# Supplementary material for: The use of Multidimensional Data to Identify the Molecular Biomarker for Pancreatic Ductal Adenocarcinoma
Source: Biomed Res Int. 2013 Sep 21;2013:798054. doi: 10.1155/2013/798054 (PMC3793503; doi:10.1155/2013/798054)
Supplement: Supplementary file 1 — Supplementary Table 1 contains gene sets used in this study. It includes 106 transcription target gene sets, 715 miRNA target gene sets and 179 KEGG pathways. Supplementary Table 2 contains 273 survival gene list selected by univariate cox proportion hazards model. Supplementary Table 3 contains results from enrichment analysis of TF regulation, miRNA target and KEGG pathway. [file 798054.f1.xls]

## Sheet: Tf target genes
Supplementary Table 1.
Gene sets used in this study
Transcription Factor	Target gene sets
ARNT_T01346	Bhlhb3,Hif1a,Fos,Ero1l,Egln2,Tff1,Bhlhb2,Tfrc,Edn1,Lep,Pgrmc1,Pgr
AR_T00040	Klk2,H3f3a,Il6,Klk14,Pigr,Myc,Klk15,Muc1,Trps1,Gtf2f1,Ncoa4,F9,Ncoa1,Plau,Fgf13,Igfbp5,Rai17,Elk1,Fhl2,Fgf8,Ncoa6,Htatip,Avp,Hoxc8,Ifnar1,Pbp,Kcnh8,Lcp1,Acpp,Foxa1,Rnf4,Pwcr1,Fgf2,Ube3a,Klkb1,Nol3,Nudt6,Pkd1,Ppbp,Rara,Hbp17,Myst2,Ccng1,Kcnh4,Il6st,Pparbp,Pnrc1,Klk3,Ecm1,Pgc
BCL3_T01928	Nf-kb2,P105,C-myb,Fyn,Pir,Selp
c-Myc_T00140	Ddx18,Tomm20,Ndufv1,Cd63,Man2a2,Recql5,Bcl3,Creb1,Mcm5,Mad2l1,Psmb1,Uk114,Chc1,Capza1,Ba108l7.2,Ddx11,Znf410,Cdk5r1,Prkcsh,Rps27a,Sod1,Tusc2,Golph3,Cdk6,Znf183,Clcn6,Znf134,Fosl1,Col4a1,Herpud1,Pfn1,Rps16,Snrpb2,Acpp,Wdr36,Gmds,Psmb7,Ptma,Abcb10,Tcirg1,Arrb2,Madh7,Khk,E2f1,Gsk3b,Cdc25c,Hlxb9,Xk,Myc,Itgb3bp,Ctsc,Brca2,Cacng3,Rpl26,Dbp,Zfp36l2,Armet,Gtf2h2,Atp6v1g2,Lmx1b,Mterf,Cxorf12,Tnfrsf8,Stmn1…
CEBPA_T00105	Apoa1,Preb,Mybl1,Gadd45a,Bcl2,Hmgcs1,Trip15,Ltf,Saa2,Apob,Kiaa0146,Csf1,Ela2,Gdnf,Abcc1,Ubp1,Tph1,Acas2,Star,Ivl,Gpx4,Edn1,Cd19,Alb,Hbe1,Lbp,Msr1,S100a9,Uhrf1,Cyp21a2,Itgal,Afp,Igf2,Hnf4a,Defa3,Fdps,Retn,Cdkn1a,Itgax,P105,Cdkn1b,Pck1,Cel,Agt,Icam1,Nfya,Mmp2,Fga,Atf1,E2f1,Nr5a1,Il10,Ldlr,Enpp3,Cetp,Cyclin a2,Sp1,Foxa2,Aldob,Hcox-2,Ccne1,Hla-doa,Myst2,Adh7,Loc144467,Pcna,Cybb,Serpinc1,Fcar,Trim26,E…
CEBPB_T00581	Il1a,Saa2,Eln,Dna topoisomerase i,Igf2,Lep,Sod1,Ighg3,Abcb1,Itgb2,Hspca,Crh,Tf,Madh3,Dlc1,Alb,Cyp19a1,Gadd45g,Afp,Cd19,Il24,Ptgs1,Il8,Cetp,Il10,Sh2d3c,P105,Hp,Csrp1,Otc,Adh6,Mefv,Hcox-2,F8,Il3,Ccl11,F3,Il4,Ccl5,Csf3r,Spink1,Nos2a,Akr1c1,Cd14,Madh4,Chat,Il5,Icam1,Abcc2,Hmgcs1,Mia,Sftpd,Tnf,Tgfb1,Adm,Il17f,Insr,Saa1,Pou5f1,Tnfaip6,Il18bp,Trim26,Ugt1a10,Prg2,Prl,Il1b,Cugbp1,Il6
CEBPD_T00583	Hmgcs1,Tnf,Pou5f1,Il6,Eln,Cftr,Lep,Hcox-2,Gadd45g,F3,Sftpd,Ccnd1,Alox5ap,Cyp19a1,Cetp,Ccl5,Nos2a,Ccne1,Mia,C3,Il1b,Il1a,Tf
CEBPE_T04883	Alox5ap,Nol3,Mpo,Ltf,C-myb,Myc,Gata1,Spi1
CEBPG_T04884	Il4
CREB1_T00163	Th,Nr4a2,Cftr,Nras,Slc6a4,Etf1,Tgfb3,Tf,Pdcl,Ins,Cxcr4,Trb@,F3,Flii,Pcsk1,Slc25a21,Tfrc,Aqp3,Cd4,Il1b,Cdk5,Jun,Pmp22,Pde4d,Chrna7,Muc4,Timp1,Aqp2,Cd8a,Vgf,Slc9a1,Myh10,Gdnf,Madh6,Thpo,Dsipi,Nts,Siat9,Ache,Srm,Me2,Hfe,Pace4,Ptk9l,Pxmp2,Odc1,Pold2,Cdc2l2,Serpinb2,Mog,Cyp11a1,Il5ra,Nos1,Dna topoisomerase i,Inhba,Msmb,Bcl2,Hla-g,Tnfrsf8,Cyp19a1,Bst1,Ifng,Cebpb,Polb,Tnfrsf6,Npc1,Tnf,Lcn7,Ube2i,Areg,Cy…
CREB2_T00051	Hcox-2,Blr1,Ppp1r15a,Hpgd,Vip,Cga,Asns,Disc1
CREM_T01803	Etv3,Jun,Ldhc,Ccnd1,Th,Ccna1,Fos,Ace,Gpx4,Icam1,Pck1,Acr,Il5ra,Il2,Fhl5,Pln,Tbp,Plat,Lor
E2F-1_T01542	Hist2h2ac,C10orf26,Cugbp1,C14orf25,N/a,Cox6a2,Flj25715,N/a,Loc339685,N/a,Mospd3,Timp1,Upar,T1a-2,Flj23323,Plekhb1,Znf198,Mapk6,Ndrg4,Mrps23,N/a,Foxa2,Nek4,Scml4,N/a,Pmscl1,Rxrg,Ankrd26,Znf26,Mgc35118,Sult1a2,N/a,N/a,Lrrtm1,Itih1,Hmgn4,N/a,Jm5,Ptprc,N/a,N/a,Sstr1,Flj14594,Loc115509,Txnl,Sp110,Alg12,N/a,N/a,Sbp2,Cdc45l,Prdm2,Wdr8,Ptd012,D13s106e,N/a,N/a,Hoxb9,Actr2,Pak7,Clasp2,Mut,Rpc155,Pola2,Arnt…
E2F-2_T01544	Pef,N/a,Mgc45556,Blvra,N/a,Oas2,N/a,Ubp1,Ext2,N/a,Trpm2,Asbabp2,Rap1ga1,N/a,Znf614,Pcolce,Cdkn2c,Dtx1,Aoc2,Bik,Dpf2,Bmsc-ubp,C21orf58,Lrsam1,Flj23323,Sstr1,N/a,Mospd3,Usp1,Zcchc8,Aoc3,Pitx2,Tigd3,Mn7,Mpst,Stxbp1,Wdr8,N/a,N/a,N/a,Kcnc4,Rsn,Mgc3123,Elovl6,Flj00012,Cp110,N/a,Loc51145,Gata3,N/a,Prkaca,Pai-1,Tgfb2,Tu12b1-ty,Cltc,If,P2ry2,Mgc16824,Loc129138,N/a,Kiaa1274,Kiaa0586,Loc90378,Pkd1l1,Lyplal1…
E2F-3_T01545	Jjaz1,Pai-1,Plau,Upar,Cdc45l,Becn1,Kiaa0254,Tp73
E2F-4_T01546	Gypc,Mlh1,Wbscr1,Haghl,Becn1,Park7,Cox7c,Supt4h1,Psma7,Rps15,Myc,Klk3,Smarca4,Loc200895,Mcm6,Msh2,Tieg,Creg,Kiaa0254,Rps8,Cstf1,Skp1a,Hnf4a,Rps6,Dmrt1,Pttg1,Dleu1,Gadd45a,Calm1,Mthfd1,Mrpl12,Plcg1,Dna topoisomerase i,Cth,Dut,Tead4,Myt1,Spn,Cks2,Rabif,Vps4a,Gal1,Ptpns1,Nol3,Gabra5,Akr7a2,Sp1,Acta1,E2f2,Vcp,Dkfzp566f0546,F3,Abca1,Rad51,Mettl3,Glud1,Spo11,Nap1l4,Tbl2,Dj860f19.1,Pole2,S100a6,Eif2b2,T…
E2F-6_T02997	Becn1,Kiaa0254,Jjaz1
EGR1_T00241	Hsd11b2,Syn1,Ccnd1,Tnf,Sos1,Zfp90,Apoa1,Vegf,Pcsk2,Epx,Rela,Ptp4a1,Cebpb,Ace,Glyat,C-myb,Sod1,Fasn,Wt1,Ltb,Timp3,Timp2,Igf2,Il6,Pdgfb,Pecam1,Cd9,Egfr,Tp73,Il2rb,Kcnh4,Cntn1,Por,Psen2,Syn2,Vamp2,Atp2a2,Pai-1,Crabp2,Pparg,Tp53,Ifng,Cdk5,F3,Kcnh8,Bcl2,Col2a1,Akr1b1,Jun,Tgfbr2,Angptl4,Cd69,Ache,Ret,Ctnnb1,Slc5a5,Rb1,Tfpi2,Alox5,Thpo,Gdf15,Flt1,Abcb1,Plau,Impdh2,Bax,Flt3,Dusp4,Pten,Fgfr3,Lhb,Mmp14,Abc…
EGR2_T00242	Ddx20,Tnfrsf6,Spint1,Fasn,Hoxb2,Bsg,Abcb1,Hoxa2,Tp73
EGR3_T00243	Cd69,Spint1,Tp73
EGR4_T05190	Tnf,Il2
ELK1_T00250	Cct8,Pdgfb,Mapk1,Prkci,Ptk9l,Egr1,Kcnmb1,Acta1,Tnf,Mcl1,Srf,Acta2,Prl,Kcnma1,Plat,Fut4,Ca9,Psen1,Fos,Sin3a,Dyx1c1,Mapk3,Erbb2,Actg1,Slc6a4,Vav1,Actg2
ELK3_T01414	Fos
ELK4_T00737	Fos
EPAS1_T02718	Kdr,Vegf,Pai-1,Nos3,Tek,Ca9,Ikbkg,Flt1
ERG_T00265	Jun,Vim,Mmp3,Vwf,Pou4f1,Flt1,Anpep,Cd19,Mmp2,Cdh5,Icam2,Mmp9,Hmox1,Tgfbr2,Tnnc1,Esr1,Col11a2,Nos3,Tnc,Setdb1
ESR1_T00261	Cyp27b1,Cdkn1a,Gadd45a,Ifnar1,Gadd45b,Xpmc2h,Tac3,Runx2,Cyr61,Tff1,Angptl4,Smarca1,Btf3l1,Nt5e,Ren,Erg,Junb,Dsipi,Foxo1a,Pnrc1,Sele,Ube2l3,Apoe,Fos,C-myb,Shc1,Fbln1,Grin2d,Akt1,Cga,Cryz,Pparg,Psg1,Cyp1a1,Serpinb9,Jun,Pcaf,Akt2,Cyp19a1,Egfr,Nr0b2,Ptprg,C3,Ube3a,Hspb1,Cxcl12,Pik3ca,Ncoa1,Nol3,Pai-1,Itgb1,Pou1f1,Cad,Cdh1,Cav2,Mmp26,Ltf,Ptma,Rara,Cav1,Lrp16,Wnt7a,Sp3,Stat5a,Znf398,Esrra,Timp4,Tgfa,Ga…
ESR2_T04651	Pnrc1,Sele,Egfr,Cryz,Pai-1,Jun,Nos3,Pgr,Ebag9,Cyp27b1,Smarca2,Fos,Xpmc2h,Crebbp,Smarca1,Cd68,Rara,Stat5a,Angptl4,Grin2d,C3,Mknk2,Oxt,Ncoa3,Pparg,Pou1f1,Mad2l1,Crhbp,Tert,Ptprc
ETS1_T00112	Cyp27b1,Runx1,Timp1,Dntt,Madh4,Pai-1,Abcc1,Csn2,Atp5b,Tcn2,Was,Chuk,Bcl2,Met,Itgax,Kdr,Itga5,Tom1,Gata1,Nrp1,Ebi3,Tbxas1,Mmp2,Hbp17,Pthlh,Hmox1,Sh2d1a,Nell1,Icam4,Trb@,Nol3,Il3,Vwf,Il2rb,Magea4,Cd5,Axl,Nos3,Cox4i1,Csf2,Brca2,Lif,Il13ra2,Birc2,Pold1,Slc26a3,Csnk2a2,Egr1,Spry2,Bid,Ets1,Fcar,Abcb1,Tnfrsf8,Socs1,Ltc4s,Lcp1,Tgfbr2,Casp4,Gp6,Abcb4,Lck,Nthl1,Kcnmb1,Flt1,Gp9,Mmp12,Jak3,Fgl2,Mpl,Ccl7,Pdgf…
ETS2_T00113	Fos,Cd34,Hpse,Chga,Gba,Csf2,Anpep,Jun,Egr1,Cyp11a1,Csf3r,Il12b,Nol3,Cdc2,Fgf1,Appbp1,Plau,Dtr,Mgat5b,Ccnd1,Il5,Brca1,Fli1,Tert,Flii,Ets1,C-myb,Tp53,Mmp3,Cga,Chrne,Fosl1,Trb@,Junb,Cd4,Tfec,Jak3,Krt18,Myc,Mmp9,Mdm2,Mybl1,Thbd,Atp5b,Pde7a,Erg,Pthlh,Msr1,Lif,Kras2,Angpt2,Tgfbr2,Cd163,Surf2,Ptk9l,Vwf,Surf1,Spp1,Flt1,Gata1,Il2,Psen1,Ntrk1,Cyclin a2
ETV4_T00685	Fos,Hcox-2,Tbxas1,Ets2,Bdkrb1,Usf1,Nos3,Syn2,Pace4,Lrp8,Nrg1,Slc6a6,Dnaja3,Ece1,Lyn,Tgfbr2,Scnn1g,Vim,Surf2,Agtr1,Mmp2,Sftpd,Surf1,Muc4,Cetp,Kcnma1,Txn,Bche,Erbb2,Nrgn,Timp1,Bst1,Mgat5b,Fli1,Agtr2,Il8,Timp2,Ets1,F9,Spp1,Apoh,Mmp13,Btk,Hpgd,Brca1,Mmp12,Nr3c2,Flii,Mmp3,Hpse,Mep1b,Mmp7,Gnrhr,Madcam1,Wt1,Il13,Upar,Shmt2,Il4,Psg9,Oas2,Lox,Psg4,Mmp19,Hfe,Psg1,Htr2a,Tnf,Cdc37,Cx26,Amd1,Slc11a1,Rnf31,Pla…
FLI1_T02066	Hmox1,Eat2,Tgfbr2,Tal1,Gp9,Polr2g,Tnnc1,Ccnd1,Pdgfc,Mmp3,Pdgfrb,Sf1,Tert,Ccnd2,Cdkn1a,Pou4f1,Srf,Fos,Ccnd3,Anpep,Upp1,Mmp2,Igfbp3,Crebbp,Sla,Rnapii large subunit,Nr5a1,Col1a1,Tnc,Itga2b,Gata1,Gp6,Lyl1,Id2,Bard1,Mmp9,Erg,Mpl
FOSB_T05984	Ccl5
FOS_T00123	Eln,Cd69,Cdk5,Mmp2,Ca2,Mt1a,Penk,Nqo1,Msr1,Srr,Ptgds,Fasn,Tshb,Pdha1,Krt16,Sprr3,Timp1,Ccl5,Snft,Tnfsf5,Tp53,Hcox-2,Madh4,Tnfrsf6,Ercc1,Gstp1,Upar,Ccnd1,Tgfb1,Ets1,Tnfaip6,Mmp13,Ubp1,Mmp3,Il2,Pgr,Il3,Ntf3,Il12b,Nts,Hspa1a,Nos1,Hla-dra,Itga5,Cdkn1a,Krt6a
GLI2_T04961	Bcl2,Foxa2,Mtss1,Foxe1,Gli
GLI3_T00331	Foxa2,Shh,Mtss1,Pvr
GLI_T00330	Nkx2-8,Bnc,Accn1,Bcl2,Pvr,Foxa2,Mtss1,Th
HIF1A_T01609	Kcna5,Loc339524,Tert,Hk2,Gapd,Tuft1,Edn1,Pfkl,Cdkn1b,Pfkfb2,Cdkn1a,Itgb2,Nr4a1,Psen2,Vegf,Tff3,Tra1,Egln1,Nt5e,Hmox1,Bhlhb3,F3,Esr1,Ep300,Flt1,Slc2a1,Igfbp1,Bhlhb2,Tgfb3,Edn2,Epo,Vhl,Egln3,Ppt1,Pai-1,Ph-4,Rora,Eno1,Lep,E2ig5,Aldoa,Mig-6,Abcb1,Tf,Socs1,Pfkfb3,Gck,Tfrc,Crebbp,Hk1,Ca9,Gbe1,Epx,Bnip3,B4galt1,Pfkfb4,Tac4,Cxcl12,Adfp,Hig1,Ccl16,Adm,Timp1,P105,Nos2a,Ldha,Pgk1,Ddit4l,Tp53,Mdk,Alas2,Kdr,C…
HLF_T01071	Lmo2,Anxa2,Runx1,Snai2,Tle4,Bce-1,Tle1,F9,F8,Anxa8
HOXA1_T01695	Prph,Irf3,Rds,Ren
HOXA4_T01703	Th
HOXB1_T01719	Otx2
HOXB2_T03323	Otx2
HOXB3_T01723	Titf1,Otx2
HOXB4_T01727	Myc,Nol3
HOXB7_T01734	Nudt6,Fgf13,Fgf2
HOXB8_T03324	Ncam1
HOXB9_T01738	Ncam1
HOXC11_T03233	Lct
HOXC8_T03326	Tnfrsf11b,Btf3l1
HOXD10_T01425	Hoxd9
HOXD3_T03331	Itga5,Itgb3,Itgb1
HOXD9_T01424	Hoxd9,Cdh1
JUNB_T01977	Lor,Sftpd,Dcn,Madh4,Ubp1,Il3,Cdkn1a,Timp1,Ivl
JUND_T01978	F3,Sftpd,Fosl1,Cntn1,Nts,Nqo1,Ccl5,Ubp1,Il3,Il5,Cdkn1a,Il6,Plat,Timp1,Tnfsf5,Ivl
JUN_T00029	Ngfb,Mt1a,App,Nat1,Cdc42,Cln5,Igfbp2,Amd1,Mmp3,Serpinb2,Adh7,Nras,Nol3,Ppara,Myc,Guca2b,Lcp1,Acsl3,Gja1,Mmp7,Madh7,Ugt2b17,Dpyd,Ccl2,Celsr1,Penk,Vcam1,Cx26,Ncl,C-myb,Pgr,Vav1,Gnrhr,F3,Ccl7,Il2rb,Plat,Tshb,Slc38a6,Stat1,Pex3,Fosl1,Icam1,Hbp17,Jun,Dhx8,Hrh1,Clu,Ivl,Fos,Pomc,Esr1,Psmal/gcp iii,Cd22,Sec6l1,Nr0b2,Ace,Ccr5,Gnrh1,Sprr1a,Chga,Oxt,Vip,Spi1,Cd79a,Il7r,Nppa,Mgat5b,Bfsp2,Tnfrsf10a,Sprr3,Bdkr…
LEF1_T02905	Spp1,Vim,Ugt8,Ccnd1,Lef1,Ncam1,Nt5e,Mmp7,Dll1,Alx4,Trb@,Rag2,Nrcam,Wnt1,Myc,Hoxc13,Ed1,Dct,Cldn2,Tra@,Nol3,Ccl7,Ela2,Mark4,Tcf3,Tcf7l1,Ada,Csnk1e,Ctnnb1,Ccr5,Mitf,Cd1d
MYBL1_T01583	Cln5,Dhrs2,Bcl2,Ncl,Mtss1,Dsipi,Cd34
MYBL2_T00065	Kip2,Sp1,Loc144467,Igf1,Ccna1,Igf1r,Nol3,Col1a1,Cdc34,Psg1,Igfbp5,P107,Pla2g6,Uchl1,Myc,Clu,Csrp1
MYB_T00137	Ebna1bp2,Spib,Terf1,Nfyc,Ca7,Hspa4,Socs2,Cbs,Pcna p120,Hnrpr,Fcar,Trhr,Cdc7,Nol3,Egr1,Snrpf,Runx1,Vim,Cebpa,Myc,Gstm1,Terf2,Hmmr,Hsu79274,Gart,Alox5,Rnf144,Hhla1,Csf1,Appbp1,Npm1,Nme2,Ranbp1,Chat,Tacstd1,Tnfrsf10a,S100a9,Crebbp,Kcnmb1,Kntc1,Tcn2,Tfam,Mrpl19,Tnfrsf10b,Dap3,Trap1,Hspa9b,Gtf2h3,Kcnh8,Cdc2,Mat2a,Psat1,Ntrk1,Erbb2,Taf9,Rpl6,Tf,Tnfrsf6,Psmd14,Ptgs1,Mnda,Itgb3,Rpl10a,Igf1,Smc4l1,Nolc1,H…
NFIC_T00176	Ddb1,Hspa1a,Atp1a1,Sos1,Csnk2a2,Dna pol alpha,Prg2,C4a,C4bpb,Gtf3c2,Gtf3c1,Rgn,Wt1,Runx2,Agt,Spata2,Slc2a4,Pgk1,Csnk2a1,Fabp7,Hcox-2,Tnnc2,Rnapii large subunit,Znf183,Hnrpa1,Arg1,Apoa2,Ada,Nme1,F9,Nos1,Cga,Pklr,Sod1,Gh2,Pfkfb1,Cyp27b1,Trim26,Hmgcs2,Col18a1,Col1a1,Pir,Smug1,Tfap2a,F3,Hmox1,Gfap,Amely,Vwf,F13a1,Rpe65,Alas1,Ubtf,Hmgb1,Il6,Jun,Tf,Krt17,Pck2,Npy,Matn1,Ahsg,Tp53,Arid4a,Eln,Stmn1,Rbp1,M…
NFIX_T04935	Adra1b
NFKB1_T00591	Map3k8,Tp53,Vegfc,F8,Cyld,Hmox1,Pde7a,Ifng,Il1rn,Tnf,Plau,Ralbp1,Npy1r,Gadd45a,Nol3,Ppara,Tnfrsf10a,Cyp27b1,Itga6,Mapk14,Tnfrsf6,Rnmt,Il2,Vcam1,Hsd11b2,Pdgfb,Tnfrsf10b,Pthlh,Igfbp2,Vegf,Pitx3,Galr1,Cxcl11,Csf1,Nqo1,Igl@,Ctsb,Cd69,Slc11a1,C-myb,Kcnma1,Bcl2,Cxcl10,Pla2g4a,Tradd,Kcnh8,Ptgs1,A2m,Hrb,Fyn,Il2ra,Madcam1,Cxcl2,Elf3,Csnk2a2,Vipr1,Ppp2r4,Vwf,Fn1,Rev3l,Myod1,Ebi3,Cxcl3,Adora1,Ccl2,Cd86,Traf…
NFKB2_T00394	Selp,Rela,Bcl2,Bcl2l1,Il8,Egfr,Tnfsf5,Vcam1
PAX1_T00398	Mmp21,Slc22a8,Slc22a6,Vhl,Pdgfra,Mmp23b
PAX2_T01823	Wt1,Tp53,Gcg,Sfrp2,Ets1
PAX3_T00679	Rnmt,Bcl2l1,Met,Ets1
Pax4_T03001	Ins
PAX5_T00070	Rag2,Rb1,Cd19,Kcnh4,Tp53,Fcer2,Mycn,Vpreb1,Igll1,Kcnh8,Lef1,Egr1,Esr1,Elk1,Ets1
PAX6_T01122	Pdhx,Ets1,Map4k2,Itga5,Krt12,Mitf,Gck,L1cam,Itgb1
PAX8_T02898	Wt1,Dio2,Titf1,Tp53,Slc5a5,Tpo,Thpo,Tg,Ncam1
PAX9_T02986	Jarid1b
PGR_T0	Myc,Ovgp1,Paep,Jun,Bag1,Pfkfb3,Ifnb1,Oat,Scgb1a1,Chga,Nol3,Hsd17b2,Klk3,Itga6,Ihh,Tgfa,Bcl2l1,Smarca3,Alb,Egf,Vegf,C-myb,Cga,Loc285847,Igfbp1,Ren
POU2F1_T00641	Grm5,Il5,Gadd45a,Ccr2,Nol3,Snapc4,Fgf4,Lifr,Vcam1,Ccr5,Cd79b,Ogn,Clc,Tnf,Hist2h2aa,Bfsp2,Tcf2,Pax5,Spi1,Hla-dra,Ivl,Gyg,Aldoc,Hcfc1,Eif4g2,Vip,Sprr3,Sox2,Nfic,Il13ra2,Ins,Gcm1,Prrx1,Siat1,Cd79a,Dsipi,Sp1,Mtch1,Sprr2a,Bche,Loc352909,Cited1,Loc144467,Prl,Hist2h2be,Pou1f1,Psg1,Txnrd1,Tfap2a,Gtf2b,Ugt2b7,Clc,Cyp27b1,Tfpi2,Akr1c1,Alb,Jund,Vwf,Ervwe1,Akr1c3,Il8,Vip,Tra@,Fgl2,Plau,Spp1,Sox11,Slc38a6,Nat…
POU2F2_T00662	Myc,Gtf2b,Nol3,Ms4a2,Ets1,Pou2af1,Spi1,Tra@,Itgax,Cd22,Cd79a,Vip,C-rel,Ccr5,Spp1,Il2,Il4,Il5,Hla-dra,Vip,Hla-dob,Pnoc,Lyn,Ivl
POU2F3_T05856	Sprr2a
PPARA_T05221	Cyp1a1,Fcer1a,C-myb,Nol3,Adipor1,Cited2,Apob48r,Hcox-2,Cd36,Acox1,Hmgcs2,Pai-1,Gadd45b,Cyp4a11,Lpl,Retn,Fabp3,Myc,Angptl4,Gata3,Gadd45g,Lipe,Got1,Ptgs1,Tgfb1,Lipa,Pdha1,Sema6b,Fads2,Nox1,Fabp1,Scgb1d1,Apob,Ccnd1,Mmp9,Apoc3,Pck1,Apoa1,Acox2,Ucp3,Fgb,Cpt1a,Acsl1,Adipor2,Ucp1,Ccnd2,Ugt2b4,Dhrs4,Hmgcs1,Akt1,Edn1,Nfkbia,Gadd45a,Vegf
PPARD_T02745	Pai-1,Gadd45a,Lpl,Fcer1a,Myc,Hsd11b1,Gadd45g,Cyp4a11,Pdha1,Lipa,Scgb1d1,Ccnd1,Apoa1,Ucp3,Ucp2,Rela,Ccnd2,Scarb1,Nol3,Pparbp,Gadd45b,Angptl4,Sema6b,Cpt1b,Vegf,C-myb,Cpt2
PPARG_T02736	Ptger2,Fcer1a,Cd36,Ncoa6,Akt1,Pou2f1,Pai-1,C21orf33,Esr2,Adipor1,Gck,Cpt1b,Madh3,Hcox-2,Lpl,Rarb,Cyp19a1,Adamts4,Adam28,Acdc,Nol3,Cyp4a11,Myc,Hes1,Acox1,Gata3,Tnfrsf11b,Acaa1,Nr1d1,Ncoa4,Gadd45g,Gdep,Pparbp,Lipa,Loc347275,Casp3,Bcl2,Nr1h3,Pdha1,Ucp1,Gadd45b,Scgb1d1,Sat,Adamts3,Retn,Ccnd1,Ppargc1a,Angptl4,Apoa1,Ppp2r2c,Apoe,Ucp2,Edn1,Sema6b,Map4k2,Cd83,Dbi,Adipor2,Cdkn1a,Cyp27a1,Ccnd2,Vegf,Ugt1a10…
RARA_T00719	Klf5,Il6,Gadd45a,Pparg,Amh,Slc10a2,Akr1b1,S100a9,Rarb,Gadd45b,Tnfaip2,Abcb1,Tgfb2,Hes1,Angptl4,Asb2,Hoxa7,Crabp2,Muc4,Icam1,Titf1,Hoxa4,Muc1,Thpo,Slc5a5,Tgm1,Hoxa1,S100a8,Pou1f1,Tgfb1,Myh6,Tg,Rpe65,Cd38,Khsrp,Pml,Ncoa2,Jun,Alb,Tpo,Flj12541,Plat,Plau,Il8,Mycn,Cyp19a1,Fgfr1,Cyp26a1,Areg,Ncoa1,Cetp,Smarca2,Scd,Ibsp,Tmsb10,Serpinf1,Gadd45g,Muc5ac,P105,Hoxd4,Rara,Fbp2,Smpd1,Il2,Alpp,Hsd17b1,Ar,Rarres3…
RARB_T00721	Ncor1,S100a9,Pnrc1,Bcl2,Hcox-2,Myc,Amh,Crabp2,Tg,Icam1,S100a8,Plat,Slc5a5,Rpe65,Fgfr1,Khsrp,Jun,Smarca2,Tpo,Rarres3,Fbp2,Ncoa1,Gstp1,Prrg1,Alpp,Ccnd1,Smarca1,Sftpb,Ins,Ncoa3,Cdkn1b,Pck1,Krt1,Mif,Pthlh,Ep300,Klf5,Mapk1,Titf1,Rarb,Tgm1,Thpo,Cetp,Pou1f1,Nol3,Ibsp,Crebbp,P105,Serpinf1,Il2,Krt19,Hdac1,Tert
RARG_T00720	Tpo,Crabp2,Ncoa1,S100a8,Alpp,Rpe65,Sftpb,Jun,Ncoa3,Cyp26a1,Mif,Rarres3,Mapk1,Gstp1,Rarb,Ccnd1,Thpo,Ins,Pou1f1,Pthlh,Ibsp,Klf5,P105,Titf1,Il2,Tgm1,Pnrc1,Cetp,Tg,Serpinf1,Fgfr1,Ncor1,Smarca2,Bcl2,Fbp2,Amh,Arr3,Icam1,Smarca1,Slc5a5,Khsrp,S100a9
RELA_T00594	Wt1,Ctsb,Vcam1,Il2,Bcl3,Saa2,Ifnb1,Elf3,Cxcl11,Relb,Nr4a1,Ar,Agt,Cxcl10,Il1r1,A2m,Tnfsf5,Pigr,Cxcl2,Casp8,Brca2,Csrp1,Cxcl3,Ccl20,Mmp14,Hcox-2,Csf2,Agxt,Pck2,Sele,Il4,Fn1,Akt1,S100a6,Il12b,Il1b,Nfkbia,F3,Irf4,C20orf97,Nol3,Nf-kb2,Mica,Mmp9,Mefv,Pitx3,Tnf,Bcl2l1,Ccl2,Sftpa2,Ppard,Ppara,Csf3,Il2ra,Hdac2,Ctnnb1,Col1a1,Gstp1,Trim26,Ccr5,Ccl3,Ccnd1,Il6,Ptx3,Ccl5,Birc3,Egfr,Ptk9l,Nos2a,Birc2,Cftr,Afp,T…
RELB_T01931	Sele,Itgam,Relb,Tnfrsf5,Cd14,Cdkn1a,Pigr
REL_T00168	Irf4,Hcox-2,Il6,F3,Egfr,Jun,Tnfsf5,Il2ra,Ifng,Nfkbia,Prss8,Ccl2,Ccl5,Icam1,Il1b,Bcl2l1,Tnfsf10,Il8,Cxcl1,P105,Il2,Cxcl2,Cxcl3,Csf2,Il12b,Csrp1
SMAD1_T03885	Cdkn1a,Id3,Ahr,Bambi,Pai-1,Tcf8,Igfbp3,Ankrd1,Tnfrsf11b,Btf3l1,Cdkn2b,Rnf111,Timp1,Col1a1,Flna,Madh7,Gdf15,Id2,Col3a1,Zfhx1b,Apob,Lbp,Ehhadh,Spp1,Pdgfc,Gnrhr,Tgfbi,Nkx2-5,Edn1,Snip1
SMAD2_T04095	Acvr1b,Sp1,Loc144467,Smurf2,Psg1,Acvr1c,Bcl2l1,Tnnc1,Foxh1,Tnc,Snip1
SMAD3_T04096	Col6a3,Jun,Tnc,Acvr1c,Btrc,Timp1,Apob,Ankrd1,Ar,Hnf4a,Sf3b2,Mmp9,Mmp13,Bcl2l1,Pthlh,Col6a1,Do,Eif4enif1,Znf198,Ctnnb1,Mia2,Tnnc1,Nol3,Col7a1,Crebbp,Areg,Ccl2,Dspp,Epx,Lef1,Madh7,Edn1,Fstl3,Vegf,Gadd45b,Vip,Zfp36,Pex6,Tgfb1,Epo,Vip,Pai-1,Dok1,Akr1b1,Col3a1,Lamc1,Myc
SMAD4_T04292	Tnnc1,Jun,Col7a1,Btrc,Areg,Fshb,Nkx2-5,Ets1,Edn1,Pthlh,Cdkn1a,Do,Esr1,Dach1,Vip,Titf1,Epo,Ccl2,Pai-1,Epx,Akr1b1,Madh7,Foxh1,Fstl3,Tnc,Gadd45b,Cdkn2b,Zfp36,Timp1,Tgfb1,Ar,Vip,Bgn,Dok1,Ihh,Apob,Hnf4a,Ctnnb1,Hcox-2
SMAD6_T04220	Cdk6
SP1_T00759	Tnfrsf6,Serpina3,Scarf1,Abcg1,Glp1r,Gas,Acacb,Prkca,Alpi,Il13,Il3ra,Mmp12,Mgc4606,Cox7a1,Nup210,Cyp3a7,Cyp26a1,Bdkrb2,Rnmt,Col18a1,Vegf,Hnf4a,Scarb1,Cd7,Agxt,Egr1,Cd99,Pgr,Aldoa,Jund,Oxtr,Tfpi2,Nf-kb2,Serpina1,Ttr,Runx1,Gja1,Tp73,Cyp27b1,Fasn,Slc19a3,Mat2b,Pdha1,Clc,Itgal,Jak3,Add1,Abcb1,Adrb1,Tinf2,Madh4,App,Utrn,Tnfrsf8,Mip,Timp2,Fn1,Ltc4s,Timp1,Fosl1,Ctf1,Hook2,Bst1,Fgl2,Cyp17a1,Chrna7,Serpinb…
SP2_T02356	Ccnd1,Tra@,Ceacam1,Mat2a,Nfatc2,Loc200895,Papss1,Cd14,Paep,Plp1,Dhfr,Papss2
SPI1_T02068	Rnase2,Gata1,Cd53,Igj,Acp5,Ighg3,P2ry10,Fcgr1a,Itga2,C-rel,B2m,Btk,S100a9,Il3,Il1rn,Fes,Ncf1,Mnda,Il12b,Il8rb,Mhc2ta,Blzf1,Pdgfrb,Slc11a1,Itgam,Chi3l1,Il5,Il1b,Itgax,Ncf2,Dab2,Tnfrsf5,Mmp2,Ctsk,Tnf,C21orf33,Csf2ra,Cd58,Ptcra,Mcm3ap,Cd68,Csf3r,Srf,Itgb2,Mpo,Kcnma1,C-myb,Erg,Itga2b,Itgb1,Serpinb1,Runx1,Ccl5,Lsp1,Tbxas1,Ncf4,Flii,Folr1,Nos3,Tgfbr2,Prtn3,Fli1,Tfec,Mme,Ela2,Znf202,Abcb4,Hes1,Ebi3,Mmp1…
STAT1_T01492	Nol3,Ptgfr,Psmb9,Ccl2,Csf1,Cdkn1a,Socs3,Fcgr1a,Pim1,Nos2a,Fcgr3a,Vip,Tp53,Muc1,Rev3l,Rnmt,Gbp1,Tap1,Icam1,Jun,Egfr,Apoe,Gata3,Hspb1,Clc,Plau,Met,Jak3,Prf1,Myc,Vip,Il2ra,Pbf,Reg1a,Irf7,Ifna1,Mat2a,Casp4,Timp1,Tnfrsf5,Clc,Timp3,B3gat3,Ccr5,Ifng,Bcl6,A2m,Tlr2,Fos,Sec6l1,Hspca,Ltc4s,Cyp19a1,Irf1,Mhc2ta,Tnfrsf8,Il6st
STAT2_T01494	Apoe,Irf7
STAT3_T05694	Birc5,Fcgr1a,Sec6l1,Fasn,Il10,Irf1,Stra13,Csrp1,Il6st,Socs3,Muc1,Tnf,Nos2a,Mcl1,Cdkn1a,Bcl2,Jun,Pim1,Jak3,Tnfrsf6,Vegf,Vip,Prf1,Hspcb,Reg1a,Il2ra,Vip,Sos1,Ccnd1,Ccnd3,Lbp,B3gat3,Il6,Tnfrsf5,Igf1,Myc,Cebpb,A2m,Kiaa0146,Bcl2l1,Mia2,Pbf,Timp3,Fos,Timp1,Hmox1,Hspca,Osm,Rora,Trh,Cyp19a1,Muc4,Nol3,Ehhadh,Socs1,Oxtr,Ccl2,Tnfrsf8,Tlr2
STAT4_T01577	Il2ra,Ifng,Aicda,Irf1,Pim1,Myc,Pbf,Prf1
STAT5A_T05735	Il6,Prf1,Egfr,Il2ra,Met,Ccnd1,Pbf,Ccnd2,Cel,Igf1,Pax5,Ifng,Esr2,Trip15,Rnmt,Bcl2,Tnfrsf5,Bcl2l1,Timp3,Osm,Csn2,Sec6l1,Il6st,Tnf,Pim1,Esr1,Ccnd3,Muc1
STAT5B_T05736	Met,Prf1,Pbf,Il2ra,Cel,Ccnd1,Pax5,Igf1,Ifng,Esr2,Rara,Rnmt,Angptl4,Tnfrsf5,Timp3,Osm,Pparg,Bcl6,Sec6l1,Il6st,Tnf,Pim1,Esr1,Ccnd3,Egfr,Muc1
STAT6_T01580	Adam8,Socs1,Ccl11,Prkca,Alox15,Il1r1,Adra2b,Tnfrsf5,Ncoa3,Bcl2l1,Irf1,Irf4,Tnf,Sele
TAL1_T00790	Gata3,Rnf41,Rb1,Tcf3,Id2,Tcf7l1,Id1,Gata2,Kit,P105,Kdr,Vegf,C-myb,Id3
TFAP2A_T00035	Pfkfb3,Atp10a,Pold1,Kit,Tbxas1,Guca2b,Cln5,Slc6a4,Fbln1,Pim1,Kcna5,Dhx8,Odc1,Hsd17b4,Cdh17,Tnfrsf6,Mpg,Upar,Il8,Nos3,Atp1a1,Spry2,Flii,Celsr1,Vegf,Cntn1,Mapt,Prnp,Il3,Penk,Adrb1,Scnn1g,Psg1,Aga,Slc13a4,Npr1,Mipep,Alox15,Il2rb,Myo6,Aqp2,Prkca,Hck,Il13,Plat,Oat,Prkcb1,Atp1a3,Vegfc,Lamb1,Ntrk1,Apex1,Atp2a3,Itpr1,Nt5e,Sp1,Sphk1,Src,Il4,Clu,Glud1,Ppp4c,Hook2,Npy1r,Mgat3,Nhlh1,Rad51l1,Impa2,Vhl,C-myb,L…
TFAP2B_T02467	Drd1,Irak2
TFAP2C_T02468	Esr1,Csta
TLX1_T02054	Aldh1a1
TP53_T00671	Nhlh2,Rad51l1,Bbc3,Il2,Prg-3,Hmgn2,Igf2,P2rx1,Tp73l,Mcm7,Hras,Nol3,Eef1a2,Cdkn1a,Gclm,Psen1,Tgfb1,Cyclin a2,Ptgs1,Rps6ka1,Ctsd,P2rx5,Tfrc,Abcb1,Trim22,E2f4,C20orf10,Vegf,Bai2,Fos,Cebpa,Pols,Ppp2r4,Sfn,Muc2,Tyms,Dgkg,Tp53ap1,Smpd1,Smpd3,E2f1,Hspcb,Stmn1,Chga,Gamt,Ccnb1,Cdc14b,Sesn2,Dgka,Cables1,Wig1,Igfbp3,Kai1,Siah1,Bcl2l1,Smpd2,E2f2,Bdkrb1,Birc6,Birc1,Ninj1,Plk3,Mdm2,Pmaip1,Tnfsf10,Dgkb,Ddb2,Lit…

## Sheet: Mirna target genes
miRNAs	Target gene sets
hsa-let-7a	AARSD1,ABCB9,ABCC10,ABCC2,ABCC5,ABCC8,ABT1,ACADVL,ACCN3,ACTA1,ACTL9,ADAM15,ADAM30,ADAMTS12,ADAMTS8,ADAT3,ADRB2,ADSL,AFF4,AGPAT4,AHI1,AJAP1,ALDH2,ALG14,ALS2CR12,ANKRD43,ANXA9,AP1S1,AP2S1,APOBEC1,APOD,APOE,APP,ARPC1B,ARPC3,ARPC5,ASNA1,ASNSD1,ATP13A2,ATP2A2,ATRNL1,AVEN,BAG2,BAX,BCAP29,BCKDK,BEST2,BLOC1S1,BPIFB3,BRF2,BRP44L,BUB1B,BZW1,BZW2,C11orf84,C12orf56,C14orf118,C14orf149,C14orf2,C14orf48,C15orf…
hsa-let-7a_star	AASDH,ABCA1,ACBD5,ACYP1,ADAM22,ADAM7,ADH4,ADSSL1,AGA,AGBL4,AGPAT9,AHDC1,AHI1,AKAP9,ALPK1,AMHR2,ANAPC10,ANKRD6,ANP32E,AOC2,AP3S1,APCS,APOB,ARL1,ARMC2,ART3,ATAD5,ATOH1,ATP5F1,AUH,BATF3,BCL2A1,BET3L,BPGM,BRD8,BRF2,BST1,BTBD10,BTNL9,BZW2,C10orf137,C11orf58,C11orf84,C13orf26,C13orf27,C14orf149,C14orf2,C14orf37,C17orf57,C17orf75,C18orf10,C19orf6,C1QBP,C1orf129,C1orf141,C1orf194,C1orf63,C20orf26,C2CD3,C…
hsa-let-7b	AARSD1,ABCB9,ABCC10,ABCC2,ABCC8,ACADVL,ACCN3,ACTA1,ACTL9,ADAM15,ADAM30,ADAMTS12,ADAMTS8,ADAT3,ADHFE1,ADRA1A,ADRB2,ADSL,AFF4,AGPAT4,AHI1,ALDH2,ALG14,ANXA9,AP1S1,AP2S1,APOD,APOE,ARHGAP9,ARHGDIB,ARMC4,ARPC1B,ARPC3,ARPC5,ASNA1,ATP13A2,ATP2A2,ATP2C1,AVEN,BAX,BCAM,BCL2A1,BEST2,BEST3,BLOC1S1,BPIFB3,BRD3,BRF2,BRP44L,BUB1B,BZW1,C10orf99,C11orf31,C11orf84,C12orf56,C14orf2,C14orf48,C15orf39,C15orf58,C17orf6…
hsa-let-7b_star	AASDH,AASDHPPT,ABCA1,ABHD6,ACBD5,ADAM7,ADSSL1,AGA,AGBL4,AGPAT9,AHDC1,AK3,AKAP9,ALDH1L2,ALPK1,ANAPC10,ANKLE2,ANKRD6,ANUBL1,AOAH,AOC2,AP3S1,APOB,ARL1,ARMC2,ART3,ATAD5,ATOH1,ATP13A4,ATP2B2,ATP5F1,AUH,AURKB,BATF3,BCL2A1,BPGM,BRD8,BRF2,BRI3,BST1,BTBD10,BTNL9,BUB1B,BZW2,C10orf137,C11orf58,C11orf84,C12orf24,C13orf27,C14orf149,C14orf2,C14orf37,C17orf75,C18orf10,C19orf40,C1QBP,C1orf114,C1orf129,C1orf141,C…
hsa-let-7c	AARSD1,ABCB9,ABCC2,ACADVL,ACCN3,ACTA1,ACTL9,ADAM15,ADAM30,ADAMTS12,ADAMTS8,ADAT3,ADRB2,ADSL,AFF4,AGPAT4,AHI1,AJAP1,ALDH2,ALG14,ALS2CR12,ANXA9,AP2S1,APOD,APOE,ARPC1B,ASNA1,ATP13A2,ATP2A2,ATRNL1,AVEN,BAX,BEGAIN,BEST2,BLOC1S1,BPIFB3,BRF2,BRP44L,BUB1B,BZW1,BZW2,C10orf99,C11orf31,C11orf84,C12orf56,C14orf118,C14orf149,C14orf2,C14orf28,C14orf48,C15orf39,C15orf58,C15orf59,C16orf42,C17orf62,C17orf79,C18or…
hsa-let-7c_star	ABCA6,ABHD12,ABHD16B,ABHD8,ADAM2,ADAM22,ADIG,ADORA3,ADPGK,ADPRHL1,AGA,ALDH1L2,ALOX12,ALS2CR12,AMN1,ANAPC10,ANKMY1,ANKRD6,ANP32E,ANUBL1,ANXA1,AOAH,AOC2,APOA5,ARHGAP33,ASPM,ATOX1,ATP13A4,ATP1A1,ATP5F1,ATP5G3,ATP6V0A4,ATP6V0B,ATP6V1E2,BAIAP2L2,BAZ1A,BCAS2,BCL2A1,BEST3,BTN3A3,BUB1B,C10orf32,C12orf44,C12orf54,C14orf149,C15orf44,C16orf80,C1orf49,C2orf89,C5orf25,C5orf34,C6orf10,C6orf192,C6orf204,C6orf97…
hsa-let-7d	AARSD1,ABCB9,ABCC10,ABCC2,ABCC8,ACADVL,ACCN3,ACTA1,ACTL9,ACTR6,ADAM15,ADAM30,ADAMTS12,ADAT3,ADORA2B,ADRB2,ADSL,AFF4,AGPAT4,AHI1,AHSG,AJAP1,AK7,ALG14,ALS2CR12,ANKZF1,ANXA9,AP1S1,AP2S1,APOD,APOE,ARHGEF26,ARMC4,ASB2,ASL,ASNA1,ATP13A2,ATP2A2,ATP5B,ATRNL1,AVEN,AVL9,BAMBI,BAX,BBX,BCKDK,BCL2A1,BEST2,BLOC1S1,BORA,BPIFB3,BRD3,BRF2,BRP44L,BUB1B,BZW1,BZW2,C11orf84,C12orf40,C12orf56,C14orf149,C14orf2,C15orf5…
hsa-let-7d_star	AASDH,AASDHPPT,ABCA1,ACBD5,ADAM7,ADPRHL1,ADRA1D,ADSSL1,AGA,AGBL4,AHDC1,AHI1,AKAP9,AKD1,ALPK1,AMOTL2,ANAPC10,ANKRD6,ANPEP,AOAH,AOC2,AP3S1,APP,ARL1,ART3,ASAP1,ASPHD2,ATAD5,ATP2B2,ATP5F1,AURKB,BATF3,BCL2L11,BET3L,BPGM,BRD8,BRF2,BRI3,BRP44,BST1,C10orf137,C11orf58,C11orf84,C12orf11,C12orf24,C13orf27,C14orf149,C14orf2,C14orf37,C17orf75,C19orf40,C1QBP,C1orf129,C1orf194,C1orf63,C20orf26,C2orf56,C2orf89,C…
hsa-let-7e	AARSD1,ABCB9,ABCC10,ABCC2,ABCC5,ACAA2,ACADVL,ACCN3,ACTA1,ADAM15,ADAM30,ADAMTS12,ADAMTS8,ADAT3,ADRB2,ADSL,AEN,AFF4,AGPAT4,AHSG,ALDH2,ALS2CR12,ANKMY1,ANKRD37,ANKRD49,ANXA9,AP1S1,AP2S1,APOE,ARMC4,ARPC3,ARPC5,AS3MT,ASNA1,ATP12A,ATP13A2,ATP2A2,AVEN,B3GNT1,BAG2,BAMBI,BAX,BCAM,BCKDK,BEST2,BEST3,BLOC1S1,BLOC1S2,BMPR1B,BRF2,BRP44L,BUB1B,BZW1,BZW2,C10orf99,C11orf31,C11orf84,C14orf118,C14orf149,C14orf48,C15…
hsa-let-7e_star	A1CF,A2LD1,ABCA2,ABCA7,ABHD2,ACSS2,ACYP2,ADCK5,ADH6,ADSSL1,AEBP1,AFG3L2,AGPAT5,AGT,AHI1,ALOX12,ANAPC5,ANKRD33,ANPEP,ANXA1,AP3S1,ARHGAP4,ARHGAP8,ART3,ASCC2,ASPM,ATOH1,ATP2B2,ATP6V0A4,ATP6V0B,AUTS2,B3GALTL,BAZ1A,BCAP29,BCAR1,BEST3,BET3L,BPGM,BPIFB2,BST1,BTNL9,BUB1B,BUB3,C12orf54,C14orf2,C14orf37,C16orf52,C17orf101,C17orf62,C18orf32,C19orf77,C1orf114,C1orf129,C1orf192,C1orf63,C20orf26,C2CD3,C5orf38,…
hsa-let-7f-1_star	AASDH,AASDHPPT,ABCA1,ACBD5,ADAM22,ADAM7,ADH4,ADORA3,ADSSL1,AGA,AGBL4,AGPAT9,AHDC1,AKAP9,ANAPC10,ANKLE2,ANKRD6,ANP32E,AOAH,AOC2,AP3S1,APCS,ARL1,ARMC2,ARMCX2,ART3,ATAD5,ATOH1,ATP13A4,ATP1A1,ATP2B2,ATP5F1,AUH,AURKB,AUTS2,BATF3,BCL2A1,BPGM,BRD8,BRD9,BRF2,BRI3,BST1,BTBD10,BUB1B,C10orf137,C11orf58,C11orf84,C13orf26,C13orf27,C14orf149,C14orf2,C14orf37,C17orf75,C18orf10,C19orf77,C1QBP,C1orf129,C1orf141,C…
hsa-let-7f-2_star	A1CF,AASDH,ABCA1,ABCA12,ABHD2,ACYP2,ADAM7,ADH6,ADM,ADSSL1,AEBP1,AGBL4,AHDC1,AHI1,AKAP9,ANKMY1,ANPEP,ANXA1,AP3S1,ARHGAP8,ART3,ASAH1,ASCC2,ATAD5,ATOX1,ATP13A4,ATP2B2,ATP5G3,ATP6V0A4,AURKB,B3GALNT2,BACE1,BCAP29,BCAR1,BCAS2,BCLAF1,BEST3,BET3L,BLZF1,BPIFB2,BRF2,BST1,BTNL9,BUB1B,BUB3,C12orf24,C14orf149,C14orf2,C14orf37,C17orf62,C1orf129,C1orf194,C1orf43,C1orf63,C20orf24,C20orf26,C2CD3,C2orf56,C2orf89,C…
hsa-let-7f	ABCB9,ABCC2,ABCC5,ABCC8,ACADVL,ACCN3,ACTA1,ACTL9,ACYP1,ADAM15,ADAM30,ADAMTS12,ADAMTS8,ADORA2B,ADRB2,ADSL,AFF4,AGPAT4,AHI1,ALG14,ALS2CR12,ANKRD43,ANKRD49,ANUBL1,ANXA1,ANXA10,ANXA9,AP1S1,AP2S1,APBB3,APOBEC1,APP,ARPC1B,ARPC3,ARPC5,AS3MT,ASNA1,ASNSD1,ATP12A,ATP13A2,ATP2A2,ATRNL1,AVEN,AVL9,BAG2,BAX,BCAP29,BCKDK,BEST2,BLOC1S1,BPIFB3,BRF2,BRMS1L,BRP44L,BUB1B,BZW1,BZW2,C11orf31,C11orf84,C12orf56,C14orf11…
hsa-let-7g	ABCB9,ABCC10,ABCC2,ABCC5,ACAD9,ACADVL,ACCN3,ACTA1,ACTL9,ADAM15,ADAMTS12,ADAMTS8,ADRB2,AFF4,AGPAT4,AGTPBP1,AHI1,AJAP1,ALG14,ANKRD37,ANKRD49,ANXA9,AP1S1,AP2S1,APP,APPL2,ARHGAP9,ARL4D,ARPC5,ASL,ASNA1,ASPHD2,ATOX1,ATP13A2,ATP2A2,ATP5D,AVEN,B3GNT1,BAX,BBX,BCAM,BCAP29,BCKDK,BCL2A1,BEST1,BEST2,BEST3,BLOC1S1,BMP15,BORA,BPIFB3,BRD3,BRMS1L,BTBD8,BUB1B,BZW1,BZW2,C11orf31,C11orf84,C14orf1,C14orf118,C14orf2,C…
hsa-let-7g_star	AADACL4,ABCA2,ABHD2,ABHD8,ACTB,ACTG1,ACYP1,ACYP2,ADH4,ADH6,AFG3L2,AHRR,AK7,AMDHD2,ANKRD9,ANPEP,ANXA10,AOAH,AP2A2,AP3B2,AP3S1,APOA5,APP,ARHGAP33,ARHGAP4,ARHGAP8,ARID1A,ASB10,ASPHD2,ATAD5,ATP2A1,ATP2B2,ATP2C2,ATP6V0B,AXDND1,BAAT,BABAM1,BAG3,BARHL1,BBS2,BCAS2,BPIFB2,BRD8,BRD9,BRPF1,BUB3,C10orf137,C10orf96,C11orf84,C12orf24,C12orf44,C14orf2,C17orf62,C18orf32,C19orf33,C19orf77,C1QBP,C1QL4,C1orf129,C20…
hsa-let-7i	AARSD1,ABCB9,ABCC10,ABCC2,ABCC5,ABHD11,ACAD9,ACADVL,ACCN3,ACSS2,ACTA1,ADAM15,ADAM22,ADAM30,ADAMTS8,ADAT3,ADCK4,ADSL,AGPAT4,AGTPBP1,AHI1,ALG14,AMIGO2,ANXA9,AP2S1,APOOL,APP,APPL2,ARHGAP9,ARPC5,ART1,ASL,ASNA1,ASPHD2,ATP13A2,ATP2A2,ATP5D,AURKA,AVEN,B3GNT1,BCKDK,BCL2A1,BEGAIN,BEST1,BEST2,BEST3,BIN3,BLOC1S1,BMP2K,BMP4,BPIFB3,BRD3,BUB1B,BZW2,C11orf31,C11orf57,C11orf84,C14orf2,C14orf48,C15orf39,C15orf58,…
hsa-let-7i_star	AADACL4,ABCA1,ABHD6,ACBD5,ACTB,ADAD2,ADAMTS6,ADSSL1,AHI1,AHRR,AK3,AK7,ALKBH8,AMOTL1,ANAPC5,ANKHD1,ANKLE2,ANKS3,ANO9,ANXA10,AOAH,AP2A2,ARHGEF10,ARHGEF4,ARL1,ARSA,ASNA1,ASPSCR1,ATAT1,ATN1,ATOH1,ATP5SL,ATPAF2,BABAM1,BAG3,BAIAP2L2,BATF3,BCKDHA,BDNF,BFSP2,BTN3A3,BZW2,C10orf137,C10orf32,C11orf84,C12orf11,C12orf50,C12orf65,C15orf56,C16orf80,C19orf6,C1orf43,C1orf63,C20orf24,C2orf89,C3orf19,C5orf15,C5orf3…
hsa-miR-1	AADAC,ABCB7,ABCC10,ACVR1,ADAM21,ADK,ADSS,ALG5,AMT,ANKRD1,ANKRD29,ANKRD37,ANKRD42,ANP32B,ANXA1,ANXA13,AP2A1,APIP,APOBEC3B,APOOL,AQR,ARHGAP15,ASH2L,ASL,ASRGL1,ASZ1,ATXN10,AUH,AVIL,B3GALT1,BMS1,BPIFB4,BSCL2,BZRAP1,C11orf61,C12orf11,C15orf24,C15orf48,C17orf62,C1orf112,C1orf49,C2orf40,C6orf115,C7orf11,C7orf23,C8orf76,C8orf84,C9orf5,C9orf82,CAGE1,CASC1,CBY3,CCDC101,CCDC146,CCDC18,CCDC53,CCL2,CD19,CDH1,…
hsa-miR-100	ABCA7,ACSF3,ADAD2,ADAT1,AGBL4,AHI1,AHRR,AHSA1,AKAP1,ALDH4A1,ALG12,ANKMY1,AP1M1,APBA3,ARHGEF18,ARID3A,ARID3B,ARL4D,ATP11C,ATP6V0B,ATP9A,BCDIN3D,BCL6B,BIRC5,BLZF1,BPGM,BTD,C10orf35,C11orf42,C11orf52,C12orf12,C16orf95,C17orf56,C1orf88,C20orf112,C2orf15,C2orf85,C3orf49,C3orf80,C5orf22,C6orf47,CAMK2D,CBS,CBWD6,CBY1,CCDC152,CCDC22,CCDC59,CDC25A,CDC42EP3,CDH16,CDT1,CECR5,CELF5,CFP,CHCHD1,CHCHD8,CHMP2B,C…
hsa-miR-100_star	AHDC1,AIF1L,AKAP5,AMBN,ANP32E,ARHGAP6,ASPH,ATP2A1,B3GALNT2,BCAR3,C11orf88,C4orf6,CCDC165,CD163,CER1,CFH,CLVS2,CPA5,CPT1B,CPT2,CXorf24,CYTL1,DCN,DUSP11,DYX1C1-CCPG1,ECI2,EPSTI1,FAP,FKBP7,FNDC1,FREM1,GNAQ,GOLGA5,HBG2,HMGN1,HNRNPH1,HNRNPR,HOXA5,IER5,IL13RA1,KIF25,LPA,MAGEE1,MDH1,MEGF11,MGST3,MIIP,MND1,MS4A8B,NEK11,NTF3,NTSR2,NUP210L,NUPL2,PCBP2,PRKAG2,PRKAG3,PRPF18,PRPF39,PTCD2,RASSF6,RPS6KA6,RSPH4A…
hsa-miR-101	AASS,ACADVL,ACSS2,ACTC1,ACTR3B,ADAMTS10,ADCK1,ADRB1,AEBP2,AGFG1,AKIRIN1,AKR1B10,ANKHD1,ANKRD17,ANKRD27,ANKUB1,ANKZF1,ANXA10,AP3D1,AP3S1,APBA3,ARHGAP10,ARHGEF3,ARID1A,ARNTL2,ARPP21,ARVCF,ASAP1,ASCC3,ASH2L,ASPN,ATG4D,ATP13A5,ATP1A4,ATP5B,ATP6V1E1,B3GALNT2,BARD1,BAZ1A,BBS2,BBS9,BCKDHB,BEGAIN,BIN2,BMX,BUB1B,BZW2,C10orf11,C10orf122,C10orf96,C12orf24,C12orf34,C12orf44,C14orf49,C16orf61,C18orf56,C19orf2…
hsa-miR-101_star	ACACB,ACTR3,ADH6,AKR1C1,ALOX15B,ALS2CR8,ANP32B,APOOL,ARSA,ASS1,ATAD2,ATIC,BORA,C11orf73,C14orf109,C17orf80,C18orf34,C1orf135,CCDC58,CCNDBP1,CCT7,CD80,CDKL3,CETN3,CHMP4B,CKS1B,CLPX,CMTM8,CNTN1,COMMD6,COPS4,COX5A,CPT1B,CRISP2,CSDE1,CWC27,CXorf30,CXorf41,DAXX,DCLRE1A,DCTN3,DCTN6,DDT,DMP1,DNAJC2,DOCK7,DSN1,DTYMK,DYM,DZIP1,ESF1,ETAA1,EWSR1,FAM20A,FAM26D,FAM47B,FAM47C,FAM63A,FAM9A,FAM9B,FBXO6,FGL1,FOXA…
hsa-miR-103	AASS,AATF,ABCC3,ABHD12,ABHD16A,ACAD9,ACAP3,ACLY,ACSBG2,ACSL5,ADAM12,AFG3L2,ALG12,AOAH,AP2A1,APOBEC2,AQP11,ARIH2,ARMCX2,ARPC2,ASB1,ASB10,ASPG,ATCAY,ATN1,ATP13A2,ATP13A4,ATP5B,ATP6AP1L,ATP6V0D1,AVEN,AVL9,AXIN2,BCAM,BCAS4,BEST1,BMX,BNIP3,BOD1,BOLA3,BPIFA2,BPIFB4,BSDC1,C10orf125,C11orf53,C15orf55,C16orf59,C1QB,C1QL3,C1orf50,C1orf74,C20orf85,C20orf96,C2orf42,C4orf19,C6orf136,CACNA2D1,CASZ1,CBLC,CCBL2,…
hsa-miR-105	ACOT4,ACTR8,AGFG2,ALKBH2,AMBN,ANKRD33B,ANXA13,APBA3,APOA1BP,APOOL,AQP8,ARHGAP40,ARPC2,ARSH,ARSK,ASF1A,ATG2B,ATP2B3,ATP6V0A4,AVEN,B2M,BARX2,BBS4,BCAT1,BNIP2,BRAP,BRE,BRMS1L,C14orf37,C15orf24,C15orf26,C16orf61,C17orf62,C1QTNF6,C1orf131,C1orf168,C1orf51,C20orf134,C7orf33,C7orf50,C8orf33,C8orf48,CADM3,CAPN8,CASP10,CASP6,CBS,CCDC34,CCDC56,CCND3,CDH16,CDH7,CDK9,CDKN2AIP,CENPN,CHAMP1,CHRNB4,CHST4,CHTF18…
hsa-miR-105_star	ABCG8,ACRV1,ADAMTSL1,AHNAK2,APBB1IP,ARG1,ARHGAP15,ARHGEF2,ATP13A1,BPY2C,C10orf122,C16orf52,C1orf98,C4orf37,CARD6,CAST,CCRL2,CD2,CEP128,CHRNA7,CNTRL,COL7A1,CYP2D6,CYP4Z1,DSG4,DUOXA2,ENTPD1,EPG5,FAM47A,FAM47C,FCER1A,FCGR1B,FHAD1,GFPT2,GLB1L2,GSG1,GTPBP3,GUF1,HAUS7,HEBP2,HMGA1P1,HPS1,HSPA1L,IDH3G,IDO1,IVNS1ABP,KAT6B,KLHL28,KLHL7,KLK8,LIN7A,LRRC61,MAP7D1,MEA1,MED24,MGAT4C,MRPL11,MS4A8B,MTX3,NAA38,NCO…
hsa-miR-106a	AADAC,AADAT,AARS2,ABCD3,ACOT9,ADHFE1,ADORA2B,AGAP10,AGAP9,AGFG2,AGMAT,AGMO,AIM2,ALDH8A1,ALPK2,AMBRA1,AMDHD1,ANKK1,ANKRD44,ANKRD9,ANP32B,ARHGAP12,ASCL3,ASTN2,ATAD2,ATAD5,ATG2A,BAMBI,BAX,BLZF1,BPHL,BPNT1,BSPH1,BTG3,C10orf76,C10orf93,C11orf82,C12orf43,C12orf65,C13orf15,C15orf40,C16orf91,C19orf45,C1orf43,C1orf63,C2orf76,C4orf29,C5orf45,C6orf15,C7orf43,C7orf45,C9orf4,C9orf78,CABLES1,CAPN13,CAPRIN2,CAS…
hsa-miR-106a_star	ACTR3B,ADRM1,AFM,AIG1,AMT,ANKRD62P1,ANXA3,ARHGAP40,ART5,AUH,AVIL,BARHL2,BICD1,BPHL,BRD1,BRDT,BUB1B,C11orf96,C16orf71,C16orf80,C1orf177,C20orf24,C3orf37,C7orf25,C9orf103,C9orf23,C9orf3,CARD9,CCK,CDKL4,CHRNA1,CLEC9A,CLGN,COPG,CSPG5,CXCL14,DCTN6,DDX24,DDX5,DDX56,DFNA5,DLL4,DONSON,DTNB,DUSP11,EIF3B,EVC2,FAM178A,FAM198A,FAM50A,FBXO36,FGF3,FOXRED1,GJB6,GK,GNAT2,GPR18,GPX7,GRB14,H2AFJ,HBB,ICOSLG,IFI35,I…
hsa-miR-106b	AADAC,AADAT,AARS2,ABCD3,ACAT2,ACER1,ACOT9,ACPL2,ADHFE1,ADORA2B,AGA,AGAP10,AGAP6,AGAP9,AGFG2,AGMAT,AGMO,AIM2,AKAP5,ALPK2,AMBRA1,ANKK1,ANKRD44,ANKRD9,ARPC3,ASCL3,ASTN2,ATAD2,ATG2A,ATG2B,BACE2,BAMBI,BLZF1,BPHL,BPNT1,BSND,BSPH1,C10orf93,C11orf82,C12orf65,C15orf40,C16orf91,C19orf2,C19orf40,C19orf45,C1orf141,C1orf43,C1orf63,C3orf62,C6orf132,C7orf43,C7orf45,C8orf85,C9orf40,C9orf78,CALHM3,CAPN13,CAPRIN2,…
hsa-miR-106b_star	ADAT3,ADRM1,AMIGO1,AMPD1,AMT,APBB3,ARFRP1,ARHGAP40,ART5,ASB1,ASCC2,ATAT1,ATP6V0B,ATP9B,ATPAF2,ATRIP,B3GNTL1,BANP,BCOR,BEGAIN,BRD1,C11orf96,C16orf80,C1orf65,C22orf36,C3orf37,C6orf154,C9orf23,C9orf3,CARD9,CCDC71,CCK,CCL3L3,CCM2,CCRL2,CD164L2,CD1B,CD52,CECR5,CHI3L1,CIB1,CNPY3,COMT,DCTN6,DDX5,DDX56,DENND2A,DNAJC4,DTYMK,DUSP8,EIF3B,EIF4G1,ELMO3,ESR2,F12,FAM156A,FAM166A,FAM22A,FAM22B,FAM50A,FBXO36,FGD3…
hsa-miR-107	AASS,AATF,ABCC3,ABHD16A,ACAD9,ACAP3,ACSBG2,ADAM12,AFG3L2,AIP,ALG12,AOAH,APOBEC2,AQP11,ARIH2,ARPC2,ASB1,ASB10,ATCAY,ATP13A2,ATP13A4,ATP6V0D1,AUH,AURKA,AVL9,BAI1,BAZ2A,BCAM,BEST1,BMX,BNIP3,BOD1,BOLA3,BPIFB4,C11orf53,C12orf11,C12orf62,C14orf48,C16orf59,C1QB,C1QL3,C1orf50,C1orf74,C20orf85,C20orf96,C2orf42,C4orf19,C6orf57,C9orf103,CARD14,CCBL2,CCDC132,CCDC18,CCNE1,CDC42EP2,CDHR1,CETN3,CHD1,CHEK1,CHMP4…
hsa-miR-10a	ABCA1,ACAD11,ACTG1,ACTL7A,ACTR1B,ADAD1,ADAD2,ADAMTS2,ADH5,ADRB3,AKTIP,ALDH2,ALPL,ALX3,AMN,ANK1,ANKMY1,ANO8,ANXA13,ARAP2,ARID5A,ARL13A,ARL4D,ARMC9,ARSI,ARSJ,ART1,ASB1,ASB16,ASB18,ASB9,ASPRV1,B9D2,BAP1,BCAR1,BCAS4,BCL6,BET3L,BORA,BYSL,C10orf68,C12orf68,C16orf57,C1orf43,C20orf103,C20orf134,C5orf45,C7orf10,C7orf50,C7orf53,C9orf169,C9orf41,CALCR,CAPS2,CC2D2A,CCBL1,CCDC56,CCL27,CCNB3,CCRL2,CDH24,CGB5,C…
hsa-miR-10a_star	ADSL,AGBL4,AKIRIN1,ALG14,AMPD3,ANKRD22,ANXA3,AQP6,ARFIP1,ARL4D,ASCL4,ASH2L,ATP1A1,ATP6V0E1,ATP9A,AZGP1,BEX1,BICD1,BMP3,BRD8,BRSK1,BTG4,C10orf122,C10orf32,C12orf48,C12orf52,C12orf66,C14orf109,C14orf135,C14orf37,C1GALT1C1,C1orf129,C2,C20orf26,C21orf59,C2orf29,C9orf131,C9orf64,CACNA2D3,CBWD1,CBWD2,CBWD3,CBWD5,CBWD6,CBWD7,CCDC111,CCDC62,CCL2,CCNB3,CCNC,CCRL2,CHEK1,CHIC1,COL6A1,COMMD3,COQ10A,COQ5,CRBN…
hsa-miR-10b	ABRA,ABT1,ACAD11,ACCN4,ACPP,ACSS2,ACTG1,ACTL7A,ACTR1B,ADAD2,ADAMTS1,ADAMTS2,ADCY7,AIM1L,AIMP2,ALDH2,ALKBH8,ALPL,ALX3,AMN,ANK1,ANKMY1,ANO8,ANXA13,ARAP1,ARAP2,ARID5A,ARIH2,ARL4D,ARPC1B,ARSI,ARSJ,ASB16,ASB18,ATOH8,B9D2,BAP1,BCAR1,BCAS4,BORA,BTLA,C10orf68,C17orf85,C1orf96,C20orf103,C20orf134,C20orf46,C22orf28,C5orf45,C7orf50,CA14,CBWD7,CCBL1,CCDC56,CCL27,CCNB3,CD68,CDH24,CDHR4,CECR6,CGB5,CHRNA10,CHRN…
hsa-miR-10b_star	ADA,ADRB2,ADSL,AGBL4,AHI1,AHNAK,ANKRD20A1,ANKRD20A2,ANKRD20A3,ANKRD22,AQP6,ARAF,ARFIP1,ARL4D,ASXL1,ATP6V0E1,ATP9A,AZGP1,BBS2,BCDIN3D,BEND7,BRD8,BRSK1,C10orf122,C10orf32,C11orf2,C11orf63,C12orf52,C12orf66,C14orf109,C18orf55,C1GALT1C1,C1orf54,C2,C20orf96,C7orf46,C9orf131,C9orf4,C9orf64,CACNA1G,CARD9,CCDC146,CCL2,CCNA2,CCNB3,CCRL2,CEACAM20,CETN1,CHD1L,CHEK1,CHIC1,CIDEB,COMMD3,COQ10A,CRBN,CYP27B1,DDX…
hsa-miR-122	ABCC10,ABHD11,ACD,ACO1,ACTL7A,ACTN1,ADAM2,ADCK2,ADCK5,AGPAT4,ALG5,ALPL,ANKRD29,ANP32B,AP4B1,APEH,ARHGAP6,ARMC3,ARR3,ARRB2,ASCL1,ASNA1,ATL3,ATP13A2,ATP1A1,ATP5A1,ATP6V1B1,BAI2,BCAT2,BCL2A1,BET3L,BICD1,BPIFB4,BROX,BYSL,C10orf93,C11orf58,C11orf61,C14orf166,C14orf48,C19orf26,C19orf48,C22orf28,C3orf32,C7orf43,C8orf84,C9orf86,C9orf96,CABS1,CAGE1,CC2D1A,CCDC146,CCDC40,CCL1,CCNG1,CD300LF,CD320,CDA,CDH24,…
hsa-miR-122_star	ACBD5,ACVRL1,ARID3C,ATP13A5,BANP,BCAN,BEST4,BRK1,C10orf93,C3orf33,C8orf85,CDK15,CNN1,COL9A1,CPA6,CRABP2,CSE1L,CSF2RA,CTDSPL2,DCBLD1,DNMT1,DOCK10,DOPEY1,DSE,ENOX1,FBXO7,G3BP1,GDF5OS,GJA8,GPSM2,GRM7,HIST1H2BK,HMGA2,HSPA14,IL1R1,ING2,KTN1,LINS,LRTOMT,NPC1L1,NSUN3,OCIAD1,OR13D1,OR5AP2,OTUD4,PAAF1,PFKFB3,PHYHD1,PLVAP,PNCK,PPID,REPS1,RGS2,RPL21,RRAGA,RUNX1T1,SKP2,SLC22A1,SLC28A2,THOC4,TJAP1,TMEM8B,TOMM…
hsa-miR-124	AATF,ABCC3,ABCD1,ABHD5,ACADVL,ACAN,ACHE,ACY3,ADIG,AGT,AGTR1,AGXT2L1,AIRE,AKT1S1,ALAS2,ALDH9A1,ALG13,ANAPC11,ANKRD53,ANKS1B,APBA3,APEX2,APH1B,APLNR,ARAF,ARPC1B,ART1,ASB4,ASCC2,ASCC3,ASPA,ATF7IP,ATP1A1,AURKA,AXDND1,BAG3,BAX,BCMO1,BEST2,BEST4,BICC1,C10orf35,C11orf82,C11orf84,C12orf39,C15orf33,C17orf101,C17orf80,C19orf48,C19orf6,C1orf68,C20orf26,C20orf85,C3orf38,C3orf54,C6orf72,C7orf26,C7orf45,C9orf2…
hsa-miR-124_star	ACE,ACY3,ACYP2,ADCY10,AFG3L1P,AIFM1,ALLC,ANKRD6,APLNR,APOA1BP,BATF,BCAM,BEST1,C11orf63,C11orf82,C16orf53,C16orf7,C16orf80,C16orf95,C22orf25,C5orf46,C7orf42,C9orf68,C9orf86,CCDC111,CCDC90B,CD2,CD27,CDC7,CDK15,CHEK2,CHGA,CHMP4C,CHSY1,COL16A1,COL6A5,CYB5A,DAP3,DDHD1,DDRGK1,DECR2,DEFB131,DGKG,DHRS4,DLGAP3,DNAI1,DNASE2B,DUS2L,ECM1,EIF3C,EIF3CL,EIF4EBP1,ENPP3,FAP,FGF22,FOXN4,FZD9,GAD2,GFOD1,GMNN,GON4L,…
hsa-miR-125a-3p	AAAS,AARS2,ABCC8,ABCD1,ABHD11,ACCN2,ACCSL,ACOT8,ACOX3,ACSBG2,ACTB,ADAP1,ADCK2,ADRA1A,AGBL5,AGPAT4,AHCY,AIG1,AK2,AMN,ANGPT4,ANK1,ANKMY1,ANKRD35,ANKRD43,APCDD1L,ARMC6,ARRB2,ART1,ART3,ATP6V0A4,AURKC,AZI1,B3GALT1,B3GNTL1,BAK1,BCAN,BCAT2,BCKDK,BEST1,BEST3,BMP4,BMP8A,BRP44L,C10orf10,C10orf58,C10orf95,C12orf60,C12orf62,C12orf65,C14orf133,C15orf23,C15orf40,C15orf44,C17orf101,C17orf50,C17orf56,C17orf80,C1…
hsa-miR-125a-5p	ABCB9,ABTB1,ACADS,ACBD4,ACCSL,ACOX3,ACSBG2,ADAM15,ADCK1,ADCK4,ADRA1A,AGPAT4,AGXT2L2,AHSP,ALDH4A1,ALG12,ALKBH2,AMELY,ANGPT4,ANKHD1,ANKMY1,ANKRD35,ANO1,ANO9,ANPEP,AP1S1,APH1B,AQP3,ARAP3,ARFGAP2,ARFGAP3,ARHGAP25,ARHGAP40,ARHGEF10L,ARID3A,ARL6IP4,ARMC5,ARMC6,ARSA,AS3MT,ASB11,ASIP,ASPHD1,ASRGL1,ATL2,ATOH8,ATP6AP1L,ATP6V0B,ATP8B1,AURKC,B3GALNT2,B9D2,BAI1,BAI2,BAK1,BATF2,BCKDK,BCL2L10,BCL2L14,BHLHA15,BI…
hsa-miR-125b-1_star	AARS,ABCB6,ACAD9,ACIN1,ACTA2,AGFG2,AIRE,ALDH6A1,AMIGO2,ANKHD1,ANKRD30BL,AOAH,APOC2,AQP1,ARHGAP19,ARHGAP33,ARMC3,ASF1B,ASGR2,ATP6V0D1,BCL2L10,BCL3,BIRC2,BLNK,BOC,BPI,BTBD6,C14orf180,C17orf56,C19orf53,C1QC,C2orf53,CALY,CAT,CCBL2,CCDC88C,CDC37L1,CDK9,CIDEC,CLYBL,CNKSR1,CNTN1,CNTNAP4,COL7A1,CORO7,COX7A2,COX8A,CREB3L3,CREB3L4,CRYBA4,CRYL1,CSAG1,CSAG2,CSAG3,CSRP2,CUL1,CYP2C19,DCST1,DCTN1,DDB2,DDRGK1,DD…
hsa-miR-125b-2_star	ABCF1,ACBD5,ADPRHL2,ADSSL1,ANAPC5,ANGPTL4,ANKHD1,ARHGAP19,ARMCX2,ASF1B,ATP6AP1L,B3GNT3,BCL2L10,BIRC2,BLZF1,BPI,BSDC1,BTBD6,C11orf88,C14orf1,C14orf180,C17orf56,C1QC,C22orf36,C2orf53,C6orf146,C9orf117,CAPNS1,CCDC66,CCDC88C,CCT3,CD36,CHGB,CHPF,CLEC14A,CLYBL,CNTRL,COL7A1,COX6A1,COX6C,COX7A2,COX8A,CRY1,CRYL1,CTNNBIP1,CUL1,CYP2C19,DCST1,DCTN1,DDB2,DECR2,DEFB135,DGKA,DHX15,DHX57,DPP8,DYX1C1-CCPG1,ECHDC2…
hsa-miR-125b	AANAT,ABCB9,ABHD3,ABTB1,ACACB,ACADS,ACCN2,ACCSL,ACOX3,ACSBG2,ACTR1B,ADAM15,ADAMTS4,ADCK1,AGPAT4,AHSP,ALG12,ALKBH2,ANGPT4,ANKHD1,ANKMY1,ANKRD35,ANKRD42,ANO7,ANPEP,AP3B2,APH1B,AQP3,ARAP3,ARHGAP40,ARHGEF10L,ARL6IP4,ARMC5,ARMC6,ARMC7,AS3MT,ASB11,ASB3,ASIP,ASPHD1,ASRGL1,ATP10A,ATP6AP1L,ATP6V0B,ATP8B1,AURKC,B9D2,BAI1,BAI2,BAK1,BCKDK,BCL2L14,BIN2,BMP8A,BMPR1B,BRD4,BRMS1,BUB1B,C10orf27,C10orf47,C10orf93,…
hsa-miR-126	ABCE1,ACOX2,ACPL2,ADAM23,ADAMTS8,ADAMTSL2,ADM,AFP,AGAP2,AHSG,ANAPC11,ANGPTL6,ANKRD44,ANKRD9,ANKS1A,ANP32B,APOA4,ARAP2,ARMCX1,ATP5D,ATP6V1B1,ATP9A,B3GALTL,BAD,BARX1,BPIFA4P,BRD1,BTBD2,C15orf24,C17orf101,C1QC,C1QL3,C1orf222,C20orf26,C2orf82,C5orf50,C7orf10,C7orf33,C8orf48,C9orf131,CABLES1,CACHD1,CALHM2,CC2D2A,CCDC18,CCDC22,CCDC39,CCDC59,CCNE2,CCR8,CCT2,CD72,CD84,CD97,CDKN2A,CDKN2AIP,CELF5,CEP128,CG…
hsa-miR-126_star	AASS,ABCA6,ABHD16A,ACOX2,ALDH1A1,ARHGAP9,ARPC3,ART3,ATN1,ATP5H,BAG3,BAI3,BCAR3,BCCIP,BDH2,BEX5,BIRC2,BRIP1,BRP44L,BTF3,BZW1,C10orf58,C11orf82,C12orf26,C12orf39,C12orf56,C14orf102,C14orf135,C14orf37,C14orf39,C1GALT1C1,C1orf31,C20orf106,C7orf46,C7orf58,C9orf25,CCDC148,CCDC22,CCDC30,CCDC53,CCDC85B,CDH9,CFHR3,CFHR4,CHRNA5,CLEC12B,CNGA1,COBLL1,COMMD10,COX4I1,CYP2A13,CYP39A1,CYTIP,DEPDC1,DIRC2,DMRT2,DN…
hsa-miR-127-3p	A3GALT2P,AACS,AARS,ACO2,ACSF2,ACVR2B,ADAD2,ADORA2B,AIFM3,AKT1S1,AMIGO2,AMN,ANGPTL6,ANKRD33B,ANKRD58,ANXA9,AP2S1,AP4M1,AQP3,ARF5,ASGR1,ATP6V1B1,ATXN7L3,AZGP1,B3GNT6,BAD,BAIAP2L2,BAZ1B,BFSP2,BMP2K,BMS1,BOC,BOP1,BRAT1,BRD8,C10orf35,C11orf2,C11orf80,C12orf54,C14orf80,C17orf101,C19orf20,C19orf28,C19orf51,C19orf52,C19orf57,C1QL3,C1orf159,C6orf25,C9orf43,CACNA1C,CCDC23,CCDC88B,CCHCR1,CCL1,CCND3,CD8B,CD9…
hsa-miR-127-5p	AACS,ABLIM2,ACAD9,ACTRT1,ADAM15,ADAM18,ADAP1,ADH5,AGTRAP,AHSP,ALKBH3,ALOX5AP,AMBRA1,APOE,ARAP1,ARFRP1,ARHGEF25,ASB16,ASB3,ATP1B4,ATP5B,ATP5D,ATXN7L3,B3GNTL1,BEST4,BFSP2,BNC2,BOP1,BTN1A1,BYSL,C10orf125,C11orf61,C12orf54,C15orf44,C16orf62,C17orf56,C19orf53,C19orf57,C1QTNF8,C1orf159,C1orf87,C5orf46,C6orf10,C9orf174,CA5A,CASS4,CCDC137,CCDC23,CCDC69,CCL1,CD48,CD99,CDCP2,CDK15,CDX2,CEACAM3,CES2,CHD1L,C…
hsa-miR-128a	A3GALT2P,ABCD4,ACAA2,ACADVL,ACCS,ACSL5,ADAMTS16,ADAMTS6,ADAP1,ADCK1,ADORA2B,AGPAT4,AGRN,AHR,ALKBH3,ALOX5,ANGPT2,ANGPTL6,ANKK1,ANKRD58,ANO10,APBA3,APLNR,APOL2,APPL2,AQP11,ARHGEF38,ATG2A,ATG7,ATP5G3,ATP9A,AVPR2,B3GNTL1,BAIAP3,BATF,BCAN,BPNT1,C10orf107,C12orf50,C12orf62,C15orf27,C16orf7,C17orf39,C19orf43,C1QL3,C1orf51,C20orf111,C20orf20,C21orf33,C2orf18,C2orf80,C3orf39,C9orf21,C9orf23,CABP1,CACNG6,C…
hsa-miR-129-3p	AARSD1,ABHD5,ABTB1,ACLY,ADAM15,AEBP1,AHNAK2,AIF1L,ALKBH5,ANAPC11,ANO9,ANXA13,AP1G2,APCDD1L,AQP5,ARF5,ARHGEF1,ARID3C,ARMC5,ARPC1B,ASPDH,AURKA,AVPR1B,B4GALT7,BAALC,BAD,BBS2,BCL7B,BPI,BPIFA1,BRD3,BRF2,C17orf58,C19orf35,C19orf45,C1orf88,C1orf94,C20orf173,C2orf57,C2orf76,C3orf25,C5orf32,C5orf42,C6orf1,C6orf126,C6orf192,C6orf94,C7orf50,C8orf85,C9orf23,C9orf43,CA7,CABLES1,CARTPT,CASKIN2,CASP6,CBWD1,CBWD…
hsa-miR-129-5p	AADAT,ACCS,ACPP,ACRV1,ADSL,AGPAT2,AGXT,AHNAK2,AK2,ALPL,ANK3,ANKRD53,ANKRD55,AP1G2,APBA3,ARAP1,ARPC2,ASB10,ASPHD1,AUP1,B3GNT1,BAD,BAG2,BCL6,BEST3,BEST4,BLZF1,BMPR1A,BPI,BRF2,BSPRY,C10orf120,C10orf27,C11orf48,C12orf11,C15orf41,C16orf70,C16orf80,C17orf58,C19orf48,C1orf38,C1orf87,C20orf173,C20orf29,C20orf30,C20orf79,C22orf23,C2orf43,C2orf62,C9orf86,CABS1,CAPN13,CATSPERG,CBWD1,CBWD3,CBWD5,CBWD6,CCBL2,…
hsa-miR-129_star	ABTB1,ACLY,ADAM15,AEBP1,APCDD1L,ARF5,ARHGAP33,ARHGEF1,ARHGEF25,ARL6,ARPC1B,ATP6V0A4,AVPR1B,BCL7B,C20orf173,C6orf192,CASC3,CASKIN2,CASP6,CCDC36,CCDC64B,CDC37,CDCP2,CHRNA2,CIB2,COQ4,CSRP1,CYB5R2,DAB1,DCTN2,DEDD2,DIP2A,DKK4,DPP7,ELOF1,ENOSF1,FAM129B,FAM173A,FAM65A,FANCG,FBXO36,FKBP11,GCHFR,GLI1,GPR12,GPRIN2,GXYLT2,GYLTL1B,HDDC3,HNRNPR,IL19,IL2,INCENP,IVL,JMJD7-PLA2G4B,JUP,KIAA0895L,LARP6,LRFN4,LRRC4…
hsa-miR-130a	ABCB7,ABCC3,ABCC9,ABHD3,ACAT2,ACER1,ACPL2,ACSL3,ACTR10,ACVR1,ADAM23,AFG3L2,ALS2CR12,AMZ2,ANKAR,ANKRD62P1,ANXA10,AP1G2,APOM,ARID1B,ARL5C,ARPC2,ASB7,ASB8,ATG4D,ATP12A,ATP6V0A4,ATPAF2,AVIL,B3GALNT2,BAI3,BARD1,BARHL2,BBS2,BCL2L14,BCL6B,BCMO1,BDH1,BEX5,BICC1,BTG3,C10orf112,C11orf96,C12orf44,C18orf55,C18orf8,C1D,C1S,C22orf15,C3orf33,C4orf29,C5,C6orf138,C6orf221,C7orf36,C8orf37,C8orf76,CAPRIN2,CBY1,CCL1…
hsa-miR-130a_star	AASDH,ACO1,ADRA1A,AKT3,AMBRA1,ANKRD10,ARPC1B,ART5,ASB15,ASNS,AUH,BID,C16orf55,C17orf74,C17orf81,C18orf56,C20orf196,C6orf146,CA5A,CCDC132,CCDC36,CCNH,CDH15,CDKL3,CECR2,CEP72,CHST7,CIB2,CLCN3,CLDN14,CLK3,CLLU1OS,CLP1,COL11A2,COL6A1,CPXM1,CTDNEP1,CXorf64,CXorf66,DCBLD1,DGAT2,DHRS13,ENDOU,EXOC1,FAM187A,FAM48A,FAM71C,FBXO25,FCGBP,FLII,FOXP2,FSHR,GALNT6,GAS2L3,GBA,GK,GLT6D1,GSC,HBG2,HEXA,HIBCH,HLA-C,HO…
hsa-miR-130b	ABCB7,ABCC5,ABCC9,ABCE1,ACAT2,ACPL2,ACSL3,ACTR10,ACVR1,ADAM23,AFG3L2,AGT,ALS2CR12,ANKAR,ANKRD62P1,ANXA10,AP1G2,APCDD1,ARID1B,ARL5C,ASB8,ATG4D,ATP12A,ATP5SL,ATP6V0A4,ATPAF2,AVIL,B3GALNT2,BAI3,BARD1,BARHL2,BCL2L14,BCL6B,BCMO1,BDH1,BEX5,BICC1,BPIFB2,C11orf82,C11orf96,C12orf44,C12orf63,C18orf8,C1D,C1S,C3orf33,C4orf29,C5,C6orf138,C6orf221,C8orf76,CAPRIN2,CASP9,CBY1,CC2D2B,CCDC75,CCL1,CCT8,CD69,CD72,CD…
hsa-miR-130b_star	AAMP,ABCA1,ABCG5,ACO1,ADAD2,ADRA1A,AK8,AKR1A1,AMIGO1,ANKRD10,ANKRD33,ARHGAP22,ARPC1B,ARRB2,BID,C16orf53,C17orf74,C17orf81,C20orf196,C22orf24,C9orf30,CARD17,CATSPER4,CBLN1,CCDC36,CCR10,CD160,CDH15,CECR2,CEP72,CHCHD3,CHRNA9,CLDN14,CLLU1OS,COQ4,CPXM1,CRH,CTDNEP1,CTSZ,CUL4B,CXorf64,CXorf66,CYP2A6,DBC1,DDAH2,DGKZ,DNAH2,ENDOU,FAM167B,FGF20,FKBP3,FLII,FNBP1L,FOXP2,GDF11,GLRX,GNB2,GNPAT,GPATCH3,GPR143,GP…
hsa-miR-132	ABHD3,ACAD9,ACP2,ACSM3,ACVR1,ACVR2B,ADAL,ADAMTS6,AEN,AGPAT3,AGTPBP1,AGTR1,AHCY,AHSP,ALKBH3,AMOT,AOAH,APC,APCDD1L,APOA1BP,ARHGAP32,ARID4B,ARMC5,ARX,ASB1,ASNS,ASZ1,ATP13A2,ATP2C2,ATP6V0D1,AVL9,B3GNT8,BCL2L11,BHLHE23,BLCAP,BMS1,BPIFB2,BRAP,BRI3,C11orf52,C11orf82,C11orf84,C11orf87,C12orf26,C12orf48,C14orf149,C14orf48,C16orf7,C16orf70,C16orf74,C16orf87,C17orf72,C19orf47,C19orf51,C1orf43,C2orf57,C3orf6…
hsa-miR-132_star	ACRBP,ADAMTS15,ATAD3B,ATAD3C,C11orf31,C16orf46,C1QTNF4,C21orf56,C2orf53,C7orf26,CAMSAP1,CCDC116,CCL17,CCNE1,CCNF,CCT6A,CD99,CDK4,CHCHD8,CNOT3,COG4,COMMD6,CRTC3,DENND2A,DET1,DHRS3,DLL4,EDC4,EPHB2,ESRRB,FAHD1,FAM160A2,FAM170A,FAM53A,FAM83F,GABRD,GCAT,GLT8D1,GNAL,GNB2,GPI,GRIN2D,HDHD3,HERC5,HMHA1,HOXB4,HS6ST1,IGSF3,IL15RA,KCNF1,KRT76,LRRC45,MCM5,MED16,METTL3,MVP,MYADML2,NCKAP5L,NR2F1,OGFR,PACS2,PFKL…
hsa-miR-133a	A4GALT,AAMP,AARS2,ABCA2,ABHD16A,ACAT2,ADAD2,ADPRHL2,ADRA1D,AIRE,AKIRIN2,ALOXE3,ANGPTL4,ANKRD5,ANKZF1,AP1B1,AP2A1,APBA3,APOB,APPL2,AQP3,ARHGAP30,ARHGEF25,ARID3A,ASB10,ASB3,ATP1A4,ATP7B,ATP8B3,AVL9,B4GALT7,BAK1P1,BARHL1,BCMO1,BHLHA15,BID,BRAT1,BRF1,BRI3,BSX,BTK,C10orf68,C11orf63,C14orf119,C16orf42,C16orf59,C16orf79,C16orf89,C18orf21,C19orf71,C19orf80,C1orf172,C22orf28,C2orf27B,C2orf53,C3orf25,C8orf…
hsa-miR-133b	A4GALT,AAMP,AANAT,AARS2,ABCA2,ABHD16A,ACAT2,ADAD2,ADPRHL2,ADRA1D,AIRE,AKIRIN2,ALOXE3,ANGPTL4,ANKRD5,ANKZF1,AP1B1,AP2A1,AP2S1,APBA3,APOB,APPL2,AQP3,ARHGAP30,ARHGEF25,ARID3A,ASB10,ASB3,ATP1A4,ATP7B,ATP8B3,AVL9,B4GALT7,BAK1P1,BARHL1,BCMO1,BHLHA15,BRAT1,BRI3,BSX,BTK,C10orf68,C11orf63,C14orf119,C16orf59,C16orf89,C18orf21,C19orf71,C19orf80,C1orf172,C22orf28,C2orf27B,C2orf53,C3orf25,C5orf4,C8orf74,CABIN…
hsa-miR-134	AAGAB,ABCD1,ABT1,ACADVL,ACCN2,ADAD1,AEBP1,ALDH3B2,ALLC,ANGPTL4,ANKRD24,ANP32B,ARHGAP30,ARL4D,ASAP2,ATIC,ATP2B2,ATP6V0C,ATP8B3,BANF1,BARD1,BARX2,BID,BLMH,BMP1,BMP2K,BOLA3,BPIFA2,BRIX1,BTBD8,C10orf11,C10orf99,C11orf41,C12orf41,C12orf51,C16orf48,C17orf85,C19orf53,C1orf106,C1orf111,C1orf115,C1orf177,C1orf85,C22orf28,C2orf27A,C7orf58,C9orf116,C9orf174,C9orf3,CA7,CACNA2D3,CAMK1D,CAPNS1,CARS,CCDC136,CCD…
hsa-miR-135a	AASDHPPT,ACAA1,ACPP,ACSM3,ADAM20,ADARB2,ADCYAP1,AEBP2,AIF1,AKR1A1,AKR1D1,AKR1E2,ALAS1,ALDH2,ALG6,ALKBH3,ANK3,ANKRD33,ANKRD55,ANKRD56,ANXA7,APEX1,APTX,ARHGAP6,ARHGEF4,ARMC4,ATP13A2,ATP6V0E1,BMS1,BNIP1,BNIP2,BRIX1,BTNL3,BZW2,C11orf31,C11orf82,C13orf27,C14orf149,C17orf79,C18orf54,C19orf53,C7orf63,C8orf47,C9orf153,CA11,CACNA1D,CACNB4,CALN1,CAP2,CCDC30,CCDC42B,CCHCR1,CCL1,CCL21,CD2,CD2BP2,CD36,CD3G,CD…
hsa-miR-135a_star	ABCD1,ACE,AHSG,AIF1,AIF1L,ALDH1A1,ANAPC5,APBB3,APOA2,AQP1,ARHGEF25,ASAP3,ATP12A,ATP2B4,ATP5G2,ATP9A,B3GNT4,BCAT2,BCL2L12,BIN2,BUB3,C15orf43,C17orf56,C17orf79,C1QTNF9,C1QTNF9B,C1orf31,C8B,C8orf34,C9orf96,CABIN1,CATSPER3,CCDC165,CD37,CD8B,CDCA2,CDH24,CENPT,CEP57L1,CETN2,CGN,CHIA,CHRNA10,CIDEB,CLEC12A,CLIP3,COPS7A,COQ4,CPSF3L,CREBBP,CRP,CUTA,CXXC1,DCTN3,DDR2,DDX27,DDX4,DHX8,DNAI2,DOM3Z,EMX1,ENOX1,EP…
hsa-miR-135b	ACAA1,ACPP,ACSM3,ADAM20,ADARB2,ADCYAP1,AEBP2,AIF1,AKR1A1,AKR1D1,AKR1E2,ALAS1,ALDH2,ALG6,ALKBH3,ALPK1,ALPK2,ANK3,ANKLE2,ANKRD55,ANKRD56,ANXA7,APEX1,APTX,ARHGAP20,ARHGAP6,ARHGEF4,ARMC4,ATP13A2,ATP6V0E1,B3GALTL,BMS1,BNIP1,BRIX1,BTNL3,BZW2,C10orf28,C11orf31,C11orf82,C13orf27,C14orf149,C17orf79,C18orf54,C19orf53,C6orf48,C7orf63,C8orf47,C9orf153,C9orf71,CACNA1D,CACNB4,CADM4,CALN1,CAP2,CCDC30,CCDC89,CCH…
hsa-miR-135b_star	ABCD1,ABHD16B,ADAMTS10,AFF4,AGPAT4,AHSG,AIF1L,ALPK1,AMT,ANAPC5,ANXA1,APBB3,APOA2,ARIH1,ATP12A,ATP2B4,ATP6V1E1,ATXN7L1,B3GNT4,BCL2L12,BRCA2,BUB3,C12orf10,C12orf56,C17orf56,C19orf57,C1QTNF9,C1QTNF9B,C1orf122,C1orf31,C4orf42,C5orf56,C8B,C9orf5,CATSPER3,CCDC13,CCDC135,CCDC146,CCDC165,CCDC40,CCL1,CD53,CDA,CDH24,CENPT,CEP164,CETN2,CHCHD6,CHIA,CHRNA10,CLDN17,CLEC12A,COQ4,CPSF3L,CRABP2,CUEDC2,CXXC1,CYP2D…
hsa-miR-136	AANAT,ABHD16A,ADAMTSL1,ADD1,AGPAT9,AKIRIN1,ALDH3B2,AMICA1,ANGPTL3,ANKRD33B,ANO2,APBB1IP,APOB,ARHGAP22,ARHGEF38,ARHGEF4,ASAH1,ATF1,ATG16L2,BCL2L14,BIN2,BLNK,BLOC1S2,C11orf34,C11orf52,C14orf37,C2orf62,C2orf70,C9orf135,C9orf64,C9orf93,CABP4,CCDC12,CCDC64B,CDH22,CDK4,CEP152,CERS4,CILP2,COPS4,CPVL,CRTAC1,CSF2RB,CSRP3,CYB5R1,CYB5R4,CYP2U1,DBC1,DCP1A,DDX4,DDX43,DDX59,DHX58,DTYMK,DUSP19,DYNC2H1,DYNLT3,EB…
hsa-miR-136_star	AASS,ACOX3,ACRC,AMY1B,ANXA5,ARMC4,ARMC8,ATG4D,B4GALNT4,BAAT,BCL2A1,BEND5,C10orf90,C12orf48,C14orf102,C2CD2L,C8orf38,C9orf30,CALCB,CASC5,CBX2,CD58,CDK5RAP3,CHRM3,CLEC14A,CNOT4,CRISP2,CYP2A13,CYP2F1,DDX18,DEFB124,DHH,DHX29,DIS3L2,DMRT2,EBPL,ECI2,EVPL,FAIM3,FAM21B,FAM22D,FANCB,FOXA3,GAP43,GFRAL,GIPC1,GLB1,GNAS,GPR37L1,GTPBP6,HCFC2,HEBP2,IDH3B,IDS,IGF1,IGFBPL1,IL13RA1,IL27,IP6K2,IQUB,ITFG1,KCNC1,KIAA…
hsa-miR-137	AASS,ABHD16B,ABHD5,ABHD6,ABTB1,ACADL,ACSL6,ACVR1,ADAM20,ADH5,AFM,AGK,AKAP14,AKIP1,AKT2,ALMS1,ANKHD1,ANKRD33B,ANUBL1,ANXA7,AOX1,APOA1BP,ARHGAP6,ARID4B,ARPC3,ASH1L,ATG4C,ATP13A3,ATP6AP1L,B4GALT7,BAZ1A,BCCIP,BLNK,BLVRB,BMP10,BNIP2,BORA,BRAP,BRIP1,BRP44L,C10orf26,C11orf61,C12orf11,C13orf26,C14orf102,C16orf46,C1GALT1,C1orf186,C20orf20,C20orf43,C2CD2,C4orf37,C6orf203,C6orf47,C8orf4,C8orf48,C9orf169,C9o…
hsa-miR-138-1_star	ADAM2,ADAT1,AGTPBP1,AQP7,B4GALNT2,BCL2L10,BRF2,BTNL8,C1orf35,C1orf98,C20orf46,C3orf19,C6orf201,C6orf62,CBY3,CD33,CD63,CDC14A,CDH9,CDX2,CEP63,CHST11,CIR1,CLDN15,CLMN,CNKSR1,COL16A1,COL9A1,CUL4B,CXorf40B,CYP3A4,DAD1,DDIT3,DEFB104A,DEFB104B,DUOX1,DUSP23,DUSP5,E2F6,ECE2,ENPEP,ENSA,FA2H,FAM114A1,FAM162A,FAM179A,FAM182B,FAM187A,FAM21C,FAM3A,FPGS,FUK,GANC,GFOD2,GJB5,GKAP1,GNL2,GP5,GPR153,GSTM1,GSTM2,GTP…
hsa-miR-138-2_star	ABCA6,ADAM2,AGTPBP1,AMTN,AOC2,APEX1,APOA5,ASPHD2,ATP6V0B,B4GALNT2,BCL6B,BRP44L,BTNL8,C10orf11,C10orf90,C1orf98,C4orf7,C6orf201,C6orf62,C8orf48,CCDC110,CCDC144A,CCDC77,CD63,CDH9,CGA,CHRNA9,CHST11,CIR1,CLCA4,CLK2,COL9A1,CUL4B,CYB5R2,DNASE1L2,DUSP23,E2F6,EBI3,ECE2,ENPEP,ENSA,EXOSC1,FAM179A,FAM21C,FBLN1,FBXL19,FMO1,FMO3,FPGS,FRMPD2,FRMPDP2,GCKR,GCM2,GJB5,GKAP1,GNL2,GPR153,GTF3C5,GTPBP3,HAX1,HELLS,HHI…
hsa-miR-138	ABCF2,ABI3,ACE,ACO1,ACTR5,ADAM11,ADH1A,ADHFE1,AHDC1,AIRE,AKT1,ALPL,ANO10,ANO8,ANXA6,APRT,ARHGAP33,ARHGAP44,ARL6IP4,ARMC7,ARMCX2,ARPP21,ARSA,ATP13A1,ATP1B1,ATP6V0A1,ATP6V0A4,ATRIP,AVPR2,BAG1,BCKDK,BEST2,BPI,BPIFB3,BRI3,C10orf82,C11orf42,C14orf118,C14orf48,C15orf48,C16orf48,C16orf79,C17orf50,C1S,C1orf111,C1orf38,C1orf49,C1orf68,C21orf2,C3AR1,C3orf52,C6orf118,C7orf50,C8B,C9orf169,CA3,CABP2,CABP4,CAC…
hsa-miR-139-3p	AANAT,ABI3,ACSF3,ADA,ADAMTSL1,ADAMTSL4,ADC,ADPRH,ADPRHL1,ADSSL1,AHCY,AHDC1,AHRR,AKAP17A,AKT1,ALDH16A1,ALDH1A1,ANKMY1,ANKRD36B,AP2M1,AP3D1,AP4M1,APBA2,APRT,AQP8,ARAP3,ARHGEF1,ASB10,ASB13,ASCC2,ATAT1,ATP2C2,ATP6V0B,ATXN3L,AVPI1,B3GALNT2,B4GALT2,BABAM1,BAD,BARHL1,BATF,BAZ2B,BCKDHA,BIN1,BIN3,BRD9,BTBD6,C10orf107,C10orf57,C10orf82,C11orf20,C14orf1,C16orf45,C16orf95,C17orf101,C17orf50,C17orf75,C17orf81…
hsa-miR-139-5p	ABCA6,ABCC11,ACCS,ACP5,ACSM3,ACYP1,ADAMTS6,ADARB2,ADC,AFG3L2,AIG1,ALKBH3,ANGPTL5,ANGPTL6,ANK1,ANK2,ANKK1,AP3D1,AQR,ARFGAP2,ARHGAP21,ARHGAP22,ARID5A,ARL9,ARPP21,ASPHD2,ATG4D,ATG9A,ATP13A5,ATP2C2,ATP5G3,ATP6V0A1,ATP7B,ATXN3L,ATXN7,AVPI1,B3GALNT2,BABAM1,BATF,BAZ2B,BBX,BCAP31,BCL2,BCL7B,BET1,BMPR1A,BTG3,BUB1B,BYSL,C10orf12,C15orf29,C16orf7,C16orf95,C17orf58,C17orf75,C1orf74,C20orf24,C22orf40,C3orf35,…
hsa-miR-140-3p	ABCA2,ABHD2,ACBD5,ACCS,ACO2,ACP5,ACSM3,ACTR5,ADA,ADAD2,ADAM18,ADAM23,ADAMTS6,ADAMTS8,AFG3L1P,AFG3L2,AGPS,ANKHD1,AP2S1,APCDD1,APLP2,ARF5,ARSI,ASB3,ATF2,ATG2B,ATL3,ATP2C2,ATP4A,ATP6AP2,ATP6V0D1,ATPAF2,BACE1,BAG1,BCAS4,BCL3,BCMO1,BPIFA2,C10orf2,C10orf96,C12orf44,C12orf51,C14orf149,C14orf37,C15orf59,C16orf7,C17orf53,C17orf96,C1S,C1orf85,C20orf26,C21orf2,C21orf90,C6orf163,C8orf47,C8orf84,C9orf95,CACNA…
hsa-miR-140-5p	AARS,AASS,ABCC10,ACAD10,ACCS,ACSBG2,ACYP1,ADAM2,ADAMTS6,ADORA2B,AKIP1,AKIRIN2,ALDH8A1,ALG8,ALKBH3,ALOX15B,ALOXE3,ALS2CR11,AMELX,AMZ2,ANKIB1,ANKRD55,ANXA3,ASB3,ASH2L,ASNA1,ATAD2,ATP6V1E2,BAG2,BCAR3,BCL3,BMPR1B,BPIFA2,BPIFB2,BPIFB4,BRP44L,BSND,C11orf82,C12orf44,C14orf48,C15orf24,C15orf40,C16orf57,C1R,C1orf50,C20orf26,C20orf46,C21orf90,C4orf33,C6orf72,C8orf47,C8orf84,C9orf71,CACNA1B,CACNB4,CAGE1,CAL…
hsa-miR-141	ABCB10,ACAD8,ACO1,ACOT7,ACOX1,ACP2,ACP5,ACTA1,ACTR6,ADAM20,ADAMTS2,ADHFE1,ADORA2B,ADORA3,AGBL4,AGFG2,AHNAK,ANGPTL5,AP3S1,APBB2,AQP10,AQP8,ARHGEF18,ARMC9,ART5,ATIC,ATL1,ATP6V0D2,ATP6V1E2,ATP8A2,AVEN,BAG2,BAI3,BCL10,BCL9,C10orf137,C10orf93,C11orf54,C12orf48,C12orf5,C14orf49,C15orf17,C16orf91,C16orf95,C17orf75,C17orf79,C18orf19,C1GALT1,C1orf114,C1orf49,C1orf50,C1orf63,C20orf196,C2orf42,C3orf67,C7orf…
hsa-miR-141_star	ADAMTS6,AKNAD1,AMELY,ANKZF1,AOX1,ARHGEF10L,ATL3,ATXN2,B3GALNT2,BCAS2,BLNK,BPIFA1,BTG4,BZRAP1,C10orf128,C12orf54,C17orf90,C19orf53,C20orf173,C2orf28,CCDC117,CD276,CDH18,CDK5RAP3,CDR1,CLCN5,COG2,COG8,COX17,CTSC,DAXX,DCBLD1,DDX53,DEPDC5,ECHDC2,EIF4E2,EMG1,EPHX1,EXOSC1,F11,FAM170A,FBXO18,FHL2,FUS,GABBR1,GLT8D1,GNMT,GRM5,GRRP1,GTF2B,HEBP2,HNMT,IFT52,IL1RL2,IL3RA,ILF2,INCENP,ITGB3BP,KCNT1,KIAA0090,KLF1…
hsa-miR-142-3p	AADAC,ABCD1,ABHD11,ACADL,ACBD6,ADAM2,ADHFE1,ADRA1D,AKIP1,AKIRIN1,ALDOB,AMBN,AP2A1,APBB2,APBB3,APC,ARHGAP6,ARIH1,ARMC3,ASB12,ASPHD1,ATF7IP,ATG16L1,ATG2A,ATP13A4,ATP1B1,ATP6V0D2,ATP6V1G3,ATP8B4,AZI1,B3GNT4,BAZ1A,BBOX1,BCOR,BCS1L,BEST3,BIRC3,BOD1,BPI,BTG3,BTNL8,BUB1B,C13orf27,C14orf1,C15orf24,C16orf78,C19orf48,C1QTNF9,C1QTNF9B,C1S,C1orf85,C1orf9,C1orf94,C20orf118,C2orf40,C2orf47,C4A,C5,C6orf192,C7or…
hsa-miR-142-5p	AADAC,AADACL4,AATF,ABLIM2,ACAT2,ACSF2,ACTC1,ACTN4,ACTR10,ACTR3B,ALMS1,ALS2,AMBN,ANKRD5,APBB3,AQR,ARHGAP33,ARHGAP6,ARID3A,ARMCX5,ARPP21,ASB3,ASXL1,ATAD2,ATG2B,ATP12A,ATP1B1,ATP5SL,BAI3,BBOX1,BBS12,BRIX1,BTBD6,BTG3,BUB1B,C11orf82,C12orf11,C12orf48,C12orf5,C12orf60,C16orf78,C18orf55,C19orf39,C19orf46,C1QTNF9,C1QTNF9B,C1orf85,C1orf94,C2orf40,C2orf47,C3orf67,C7orf46,C8orf34,C8orf76,C9,CACNA1G,CALCA,CA…
hsa-miR-143	AADAC,AASS,ABHD14A,ACTN1,ADAMTSL1,ADHFE1,AFG3L2,AGAP2,AICDA,ALG5,ALLC,ALS2CR11,ANKRD37,ANKRD46,ANO2,ANO7,APLP1,ARHGAP15,ARHGAP9,ASCL1,ASXL1,ATG2B,ATP10A,ATP12A,ATP5B,ATP5S,BAG2,BAG3,BCAP31,BCCIP,BEX4,BICD1,BPIFB2,BRD2,C10orf99,C15orf23,C15orf48,C16orf61,C19orf10,C19orf71,C1orf49,C5AR1,C6orf130,C6orf162,C7orf28B,C7orf58,C8B,CAB39L,CACNA1A,CALN1,CASC1,CCBL1,CCDC58,CCDC60,CCDC64,CCDC94,CCDC96,CCL23,…
hsa-miR-143_star	ABHD12,AFAP1,AIRE,ATP8B2,C10orf90,C19orf40,C19orf46,CACNA1B,CASC5,CBR3,CCL5,CDY1,CDY1B,CENPM,CHADL,COX6B2,CYP20A1,DDI2,DNAH11,DOCK8,DPY19L2,EDA,EDARADD,EFS,ENSA,FBXL13,FNDC4,FUT6,GAD1,GATAD1,HEATR2,HIF3A,HIST1H2BM,HSCB,HSD17B7,HSFY1,HSPB9,HTR3B,IMPA2,IMPDH2,INPP5D,KANK3,KCNH2,KCNH6,KIAA1324,KIF4A,L2HGDH,LSM14B,MAP3K11,MAP3K6,MB21D1,MKNK2,MPP4,MUC1,NLRP12,NME7,NME9,PDLIM5,PGLYRP2,PHACTR1,PIF1,PIK3…
hsa-miR-144	AADAC,ABCA12,ACTR6,ACYP2,ADCK1,ADM,AGA,AIMP1,AKAP1,ALDH1A2,ALDOB,ALS2,AMPH,ANGPTL3,ANGPTL7,ANKRD10,ANXA10,ANXA3,APEX2,APOBEC4,ARHGAP18,ARIH1,ARNTL2,ARPP21,ASB11,ASB3,ASB5,ASCC1,ATP5B,B3GALNT2,BARD1,BCL9,BEX2,BMP2,BMPR1A,BMX,BRDT,BTG3,BUB1B,C11orf58,C11orf82,C12orf5,C16orf80,C19orf2,C1orf101,C4orf32,C6orf103,C6orf136,C7orf25,C8orf76,CALCB,CAP2,CAPRIN2,CASK,CBLB,CBLL1,CCDC132,CCDC22,CCDC90B,CCDC99,…
hsa-miR-144_star	ADAM2,ATG16L2,ATG2A,BTAF1,C13orf27,C7orf11,C8orf80,C9orf93,CBWD1,CBWD2,CBWD3,CBWD5,CBWD6,CCDC82,CDCA3,CENPC1,CEP192,CLEC2D,CLVS1,COL13A1,CT47B1,CTSL1,CTSL2,DLL1,DST,DUSP12,EFHA1,EIF2A,FGG,GFRAL,GLYAT,GPRASP2,HOXA13,HRASLS,IFNA14,IL17F,IL19,INTS4,JMJD1C,KLHL36,NPM1,PARP2,PAX3,PDCD5,PDZK1,PEX7,PON3,POU1F1,RAD21L1,RBBP8,RBM39,RPAP1,RQCD1,RRAGC,SAP30L,SLC7A3,SMG8,SNX2,SPACA5,SPACA5B,SPAG17,SPINK7,SYN…
hsa-miR-145	AARS,ABI3,ACAD8,ACBD5,ACBD6,ACSBG2,ACTB,ACTG1,ACTR3,ADCK2,ADRA1A,ADRM1,AKIP1,ANGPT4,ANK1,ANKRD33B,ANXA13,AP1G2,AP3M2,AP3S1,ARAP1,ARHGAP32,ARID3B,ARID5A,ASPHD1,ATF1,ATP4A,ATP6V0B,ATXN2,B3GAT3,BATF,BMP1,BMP15,BMP4,BPIFB4,BRF1,C10orf116,C10orf62,C10orf68,C10orf76,C11orf53,C14orf49,C16orf59,C1QL2,C1QL4,C1orf112,C1orf182,C21orf2,C21orf58,C2orf65,C2orf80,C4orf50,C6orf115,C6orf154,C7orf11,C8orf76,C8orf8…
hsa-miR-145_star	ACTR3B,ADH6,ANGPTL6,AP4B1,ASGR1,ATP13A4,ATP4B,ATPAF1-AS1,BPI,C11orf54,C11orf88,C13orf35,C1QC,C6orf115,C8B,C9orf80,CDH24,CLC,CLPX,CMBL,CNGA2,COG7,COQ3,DDIT4,DDX1,DHRS2,DNHD1,DOK1,EID2B,FAM69B,FAM92A1,FCRL5,FGF1,FNDC1,GGCT,GZMK,HDDC3,HMGA2,HSFY2,IVL,KLK4,KRT20,KRT40,LIN52,LRRC2,LRRTM1,LSM2,LSM3,METTL3,MSLN,MTFMT,NSUN6,NT5C3L,PCSK6,PDZK1,PER1,PHF20,PHRF1,POLR1C,PPP2R2B,PRKCH,PTGER3,PUS3,PYGL,RASSF3,…
hsa-miR-146a	ABCC10,ACTR3,ACYP1,ADAM23,ADAM30,ADCK3,ADPRHL1,AFAP1L2,AGPAT3,AHRR,AKAP8,ALPK1,ALS2CR12,AMOTL1,ANGPTL2,ANO7,ANXA9,APEX1,AQP11,AQR,ARHGAP35,ARHGEF4,ARMC4,ARSH,ATOH8,ATP10B,ATP4B,ATP6V1C2,ATP7B,AUP1,AURKAIP1,B3GALT2,B3GNT1,B3GNT2,BAI3,BCCIP,BLZF1,BMP2KL,BNIP3,BRDT,BZRAP1,C10orf112,C10orf96,C11orf84,C12orf51,C14orf135,C14orf166,C19orf56,C1orf123,C1orf186,C1orf43,C20orf111,C20orf26,C21orf33,C22orf23,…
hsa-miR-146a_star	AAMP,ACAA2,AIM2,ALKBH2,AMELY,ARAP1,ARHGEF10L,ATG7,ATP6V1H,B9D1,BBS2,BCCIP,BMP15,BUD13,C11orf48,C14orf149,C16orf53,C20orf134,C22orf23,C3orf67,C9orf102,C9orf16,CD164L2,CD248,CFLAR,CXCR7,DDX43,DPAGT1,EBF1,EGFL8,ELSPBP1,EMD,ENDOG,FAM100A,FAM105B,FAM13C,FAM164A,FBXO24,FBXO9,FRG1,FRG1B,FRRS1,G0S2,GAST,GATA1,GET4,GHSR,GPR12,GPR176,GRAP,HSH2D,IGFL3,IL18RAP,IL5,IL6,KRT15,LAMB2,LCE1B,LIG3,LILRA1,LINGO4,LRR…
hsa-miR-146b-3p	A2LD1,AAMP,AATF,ABLIM2,ACPP,ACTL7B,ADAM22,AGRN,AHSA1,AIMP2,ALDH2,ANGPTL1,ANKRD13D,ANKZF1,ANPEP,ANXA13,AP3D1,AP4M1,APBA3,APEH,ARID3B,ARID5A,ARMC4,ART5,ASIP,ASL,ATG4D,ATP13A1,ATP6V0B,B4GALNT3,B9D2,BAI1,BET3L,BRD9,BRSK1,BSND,BST2,BTLA,C10orf120,C10orf28,C10orf68,C12orf51,C12orf53,C14orf37,C17orf107,C17orf59,C19orf29,C19orf71,C1S,C1orf170,C1orf192,C1orf222,C1orf43,C20orf134,C22orf28,C2orf84,C6orf145,…
hsa-miR-146b-5p	ABCC10,ACTR3,ACYP1,ADAM23,ADCK3,ADD1,AFAP1L2,AGPAT3,AHRR,AKAP8,ALOX5AP,ALPK1,ALS2CR12,ANGPTL2,ANO7,ANXA9,APEX1,AQP11,AQR,ARAF,ARHGAP35,ARHGEF4,ARMC2,ARMC4,ATG7,ATOH8,ATP10B,ATP6V1C2,ATP7B,B3GALT2,B3GNT1,B3GNT2,BAI3,BAZ2B,BCCIP,BEST2,BLVRA,BLZF1,BMP2KL,BRDT,BZRAP1,C10orf112,C10orf96,C12orf51,C14orf166,C16orf42,C1orf186,C1orf43,C20orf26,C21orf33,C22orf23,C5orf46,C6orf203,C8orf84,C9orf125,C9orf3,C9o…
hsa-miR-147	ABCA7,ABCF3,ABHD5,ABHD6,ABLIM2,ACAA1,ACO2,ACTB,ACTL7A,ACTL7B,ADA,ADAMTSL5,ADAP1,ADAT3,ADCK5,ADH5,AGBL2,AKNAD1,AKT2,ALOX5,AMPD1,ANGPT4,ANKRD5,ANKS3,ANO1,ANXA13,AP2M1,APOH,AQP8,ARHGAP22,ARHGAP30,ARHGEF1,ARHGEF40,ARID3A,ARPC2,ATIC,BCHE,BCL2L14,BCL7B,BCOR,BICD1,BIN2,BMP2K,BPIFA2,BRCA2,BRD3,BRD4,BRE,BTBD6,BZW2,C10orf10,C10orf128,C10orf57,C11orf2,C12orf5,C15orf48,C16orf95,C19orf80,C1GALT1,C1GALT1C1,C1o…
hsa-miR-147b	ABCC3,ABCC6,ABCF3,ABHD6,ABHD8,ABLIM2,ACAP3,ACTB,ACYP1,ADA,ADAD2,ADAM15,ADAT3,ADCK1,AHDC1,AK7,AKAP17A,ALOX5,ANAPC1,ANKMY1,ANXA13,AP2M1,APOH,AQP5,AQP8,ARFGEF1,ARHGAP22,ARHGEF1,ARL4D,ARPC2,ARRDC4,ASCL1,ATP2B3,ATP6V1B1,ATP7B,ATP8A2,BAMBI,BCHE,BCL2L14,BCL7B,BHLHE23,BICD1,BMP1,BMP2K,BPIFA2,BRD3,BRD4,BRD9,BRE,BTBD6,C10orf128,C11orf87,C12orf50,C12orf53,C15orf48,C17orf50,C19orf26,C1GALT1C1,C1orf111,C1orf1…
hsa-miR-148a	AASS,ABCB7,ABCC3,ABHD12,ACTL7A,ADRM1,AFG3L2,AGBL1,AGTR1,AK2,AKAP1,ALG13,ALS2CR12,ANAPC2,ANKS3,AP1G2,APLNR,APOA4,APOM,AQP11,AQP7,ARFGEF1,ARMC5,ARPC5L,ART3,ATG4D,ATG9A,ATOH7,ATP4B,ATP5S,ATP6AP2,ATPAF2,ATRIP,B3GAT3,B4GALT6,BAG3,BAI3,BBC3,BBS7,BDKRB1,BEAN1,C12orf24,C12orf42,C14orf2,C16orf70,C16orf80,C16orf85,C17orf99,C18orf8,C1GALT1,C1QL3,C22orf25,C2orf42,C2orf80,C3orf52,C3orf54,C6orf115,C6orf211,C8o…
hsa-miR-148a_star	ACE,ALG14,ALS2CR8,ANGPTL1,ARHGAP22,ART3,ASB2,BARHL2,BCCIP,BEST3,BST2,C15orf44,C1orf192,C21orf59,C7orf44,C8orf48,CBWD1,CBWD2,CBWD3,CBWD5,CBWD6,CCDC23,CCDC99,CD244,CD72,CDK8,CETN3,CFH,CFHR1,CFHR2,CLLU1OS,CNPPD1,CRLS1,CUEDC1,DCTN1,DDX43,DENND2D,DHRS2,DOCK2,DRG1,DSC1,DUSP11,EDN2,EEF1A1,EPB41,EPHA8,FAM160A2,FAM9B,FASTKD3,FBXL13,FGD4,FKBP3,FRY,GJC1,GMPR,GTPBP3,GUCY2C,H2AFY2,HBD,HBG2,HBXIP,HEATR1,HELZ,H…
hsa-miR-148b	AASS,ABCB7,ABCC3,ABCD3,ABI1,ACAA2,ACBD6,ADNP2,AFG3L2,AGBL1,AGBL2,AGTR1,AK2,AKAP1,ALG13,ALS2CR12,ANAPC2,ANKS3,AP1G2,APBA1,APLNR,APOA4,APOM,AQP11,ARFGEF1,ARL6IP1,ARMC5,ARPC5L,ART3,ATG4C,ATG4D,ATG9A,ATP4B,ATP6AP2,ATPAF2,ATRIP,B3GAT3,B4GALT6,BAG3,BAI3,BBC3,BBS7,BDKRB1,BEAN1,C12orf24,C12orf42,C14orf2,C16orf70,C16orf80,C16orf85,C17orf99,C18orf8,C1GALT1,C1QL3,C20orf118,C2orf42,C2orf80,C3orf52,C6orf115,C…
hsa-miR-148b_star	ACTR5,ALG14,ALKBH8,ANGPTL6,APOBEC3F,ARHGAP22,ART3,ASB2,ASPH,ATPAF1-AS1,BCCIP,BIRC7,C1orf112,C1orf167,C1orf192,C5orf46,C7orf31,C8orf85,CA5A,CALCA,CCDC134,CCDC146,CCDC147,CCDC23,CCDC73,CCRL2,CD244,CDCP2,CETN3,CLEC4M,CLNS1A,COL4A3,COPZ2,CRLS1,DDX39A,DENND2D,DOCK2,DRG1,DUSP11,EEF1A1,EPB41,EPSTI1,FAM123A,FAM159B,FAM9B,FASTKD3,FBXL13,FRY,GJC1,GMPR,GNB2L1,HBG2,HBXIP,HEATR1,HELZ,HIST1H2BD,HRH2,HSFY2,HSPA…
hsa-miR-149	ABCA2,ABCB9,ABCD1,ACADS,ADAMTS10,ADAMTSL1,ADCK5,AEBP1,AK8,ANGPT4,ANKRD56,ANPEP,ANXA6,AP1B1,AP2A1,ARHGAP22,ARHGEF4,ARRDC2,ASTN2,ATP5D,AWAT2,B3GAT3,BAD,BAI1,BBS4,BEST4,BGN,BPIFB2,BRD9,BRMS1,BSX,BZRAP1,C10orf125,C10orf93,C19orf71,C19orf77,C1orf177,C20orf4,C3orf25,C6orf136,C6orf221,C9orf86,CABP1,CACNA1D,CCDC116,CCDC136,CCDC142,CCDC88B,CD22,CD320,CD72,CENPB,CENPV,CHCHD3,CHRM1,CLDN4,CNPY3,COPE,CREB3L3,…
hsa-miR-149_star	ABCB8,ACBD4,AGAP2,ALDH1L1,ALPL,AP2S1,AP3B2,APLNR,ATN1,ATP1A3,ATP6V1B1,B4GALNT4,BARX2,BHLHE23,BPIFB3,BPIFB4,C1orf111,C20orf27,CACNA1F,CAMK1,CAPZB,CCDC105,CCDC167,CD99,CDH23,CERS4,CIZ1,CLTB,CNPY3,CNTFR,COL11A2,CSF2RB,CXorf64,CYP11B1,CYP2F1,DBP,DDAH2,DDRGK1,DES,EHMT2,EPS15L1,ERI3,EXOC3,FAM178B,FLT3LG,G6PC3,GAP43,GNB2,GNB3,HAMP,HDHD3,HOXD11,HRAS,IFITM5,IGFBP2,IGSF8,IL32,ISYNA1,KCNF1,KCTD13,KLF16,KLK4…
hsa-miR-150	AARS,ABHD11,ACAD10,ACO1,ADAD2,ADAM15,ADH6,AIG1,AKT1S1,ANKRD58,AP2A1,APOB,APPL2,ARAF,ARAP1,ARAP3,ARIH2,ARRB2,ARSI,ASB3,ASCL1,ASGR1,ATG16L2,B3GNT1,BASP1,BAX,BLZF1,BOLA1,BRD9,BSN,C12orf24,C2CD2L,C6orf154,C7orf68,CACNA1D,CACNA1G,CACNG6,CADM4,CAMK1,CAMK1D,CBLB,CBY1,CC2D1A,CCDC106,CCDC142,CCDC22,CCDC85B,CCDC88B,CCL5,CCT3,CD52,CDKN2D,CDX1,CERS5,CFLAR,CHRNB2,CNPPD1,COG7,COMMD10,COPS3,CORO7,CRYAA,CSF2RA,C…
hsa-miR-150_star	ACADVL,ADCK1,AFAP1,ALDH4A1,ALS2CR12,AMICA1,ANKRD9,ANKS3,APOC1,ARHGEF1,ATP2B4,BAD,C14orf49,C16orf57,C16orf71,CALM2,CAPNS1,CBR1,CCDC40,CD7,CFHR4,CHST8,CNTRL,CST3,CST4,CYP2F1,DEFB135,DHDDS,DMKN,DNASE1L2,DPYS,DYNLL1,DYRK1B,EFNA1,EIF4G1,EIF6,ENPP2,FABP3,FAM162A,FAM75D5,FANCD2,FEZF2,FOXRED1,FTH1,GAMT,GBA2,GCKR,GCNT6,GLDC,GPKOW,GPR161,GPR182,GPR98,GPSM1,GSPT2,GUCY1A2,HGSNAT,HMG20B,HOXC13,IGHMBP2,IL36B,I…
hsa-miR-151-3p	ABCC11,ABHD14A,ACOX1,ACP6,ACSS2,ACTN1,ADAM7,ADCYAP1R1,AHCYL1,AKIRIN1,ANKHD1,ANKRD26,ANKRD53,ANXA1,APEH,APOA1BP,ARAP3,ARFRP1,ARRDC2,ASXL1,ATP5F1,ATP6V0A4,AVPI1,BARX1,BBS4,BCL6B,BMS1,BRIP1,BSND,BTBD7,BTD,C10orf10,C10orf125,C14orf119,C15orf33,C15orf41,C15orf59,C16orf62,C17orf79,C17orf80,C20orf134,C4BPA,C4orf37,C4orf43,C9orf117,C9orf142,CABS1,CARD14,CATSPER1,CCDC12,CCDC22,CCDC28A,CCDC42,CCDC69,CCDC86…
hsa-miR-151-5p	A3GALT2P,AANAT,ABCB11,ABCC11,ADCYAP1R1,AGAP4,AGAP5,AGAP6,AGAP8,AIG1,ALKBH5,AMN,ANKHD1,ANKRD30BL,ANKRD42,ANO7,APBB3,APEH,APH1A,APOA1BP,APOC3,APOO,ARFRP1,ASB1,ASB18,ASPA,ASXL1,ATP2C2,ATP5B,ATP6V0A4,ATPAF1,B4GALT3,BAI1,BARX1,BCKDK,BCS1L,BEST2,BICC1,BORA,BRMS1,BTK,C10orf116,C10orf125,C10orf71,C12orf44,C14orf1,C17orf79,C18orf19,C18orf21,C19orf21,C1orf35,C5orf39,CACNA1G,CACNG1,CACNG7,CALCA,CALHM2,CALML…
hsa-miR-152	AASS,ABCB7,ABCC3,ABHD12,ACAA2,ACBD6,ACTL9,ADAM23,AGBL2,AKAP1,ALG13,ANAPC2,AP1G2,APOA4,AQP11,AQP7,ARFGEF1,ARPC5L,ATG4D,ATP2A2,ATP4B,ATP5B,ATP6AP2,ATPAF2,ATRIP,B3GAT3,B4GALT6,BAG3,BAI3,BBC3,BEAN1,C12orf24,C14orf37,C15orf41,C16orf70,C16orf80,C16orf85,C17orf39,C17orf62,C17orf80,C19orf53,C1GALT1,C1orf49,C1orf68,C2orf42,C2orf80,C3orf21,C3orf37,C3orf54,C5orf30,C6orf115,C6orf211,C8orf76,C9orf125,C9orf174…
hsa-miR-153	ABCC2,ABCC4,ABCF3,ABI3BP,ACAA1,ACAP3,ACTB,ACTN4,ACYP2,ADAMTS8,ADH6,AIFM1,AKT1,ALDH6A1,ALDOC,ALG5,ALG6,ALOX12,AMPH,ANGPT2,ANKRD10,ANXA1,AOAH,AP3B2,AP3S1,APEH,APP,ARHGAP21,ARHGEF40,ARL13A,ARL4D,ARPC1B,ASCC3,ATG3,ATP2C1,ATP9A,AXDND1,B4GALT3,BAD,BET1,BLOC1S2,BOC,BRCA1,C11orf54,C14orf109,C14orf39,C15orf26,C17orf62,C1orf168,C1orf63,C20orf103,C20orf85,C2orf67,C4orf47,C7orf23,C7orf58,C8orf34,C9orf103,C9o…
hsa-miR-154	ABCC9,ACBD5,ACER1,ACMSD,ACOT13,ADAM18,ADAM32,ADHFE1,ADRA1A,AMPD1,ANK1,ANKHD1,ANO2,ANXA9,AP3M1,APLNR,APOOL,ARMC7,ARPC5,ASL,ASTE1,ATG7,ATP8B1,ATRIP,AURKA,B3GALNT2,B4GALT4,BBX,BCL2L13,BLOC1S2,BMPR1B,BTBD8,BTF3,BTG3,C11orf10,C14orf49,C16orf80,C17orf50,C3orf78,C7orf25,CABP7,CATSPER2,CBWD6,CCBL1,CCDC127,CCDC132,CCDC158,CCDC65,CCM2,CD101,CD151,CDK15,CEP152,CEP57L1,CERS4,CHGA,CHGB,CHST9,CILP,COL14A1,COL5…
hsa-miR-154_star	ABHD16B,ACYP1,ADAM2,AFTPH,AGAP3,ALG14,ANKRD37,ANP32B,APBA3,ARGLU1,ASCC3,ATP6V0A4,AVPR1A,AZIN1,BABAM1,C12orf24,C13orf26,C20orf196,C3orf67,CALB2,CCDC132,CCDC150,CCDC83,CCL18,CCR2,CDH15,CENPV,CEP192,CEP72,CETN3,CFH,CGRRF1,CHKA,CMAS,CRHBP,CROT,CSNK2B,CTNNA3,CUBN,DCPS,EFHC2,EHHADH,FAM164A,FBXL21,FCAMR,FIGF,FXN,GALNTL4,GJA10,GUCA1A,HDC,HM13,HSD17B8,HSPB2,IDS,IL2,KCNA2,KIAA1217,KIAA1524,KLHL32,LHX9,LRR1…
hsa-miR-155	ABCD2,ACOT12,ACTA1,ACTL7A,ACTR10,ACYP1,ADAM20,AFMID,AHRR,AICDA,AKAP10,AKR1C1,ALDH1A1,ALPK2,AMBN,ANKRD32,ANKRD44,ANXA3,ARHGAP18,ARIH2,ARMC2,ARRB2,ATP13A2,ATP13A5,BEST2,BEST3,BIN2,BMP2K,BOC,BRCA2,BRD1,C10orf90,C10orf93,C11orf82,C14orf38,C15orf41,C17orf80,C19orf12,C19orf39,C1orf63,C8orf4,C8orf45,C9orf23,C9orf78,CA6,CABP4,CAPN8,CAPRIN2,CARD10,CARHSP1,CARS2,CASP6,CCDC132,CCDC169,CCDC53,CCDC89,CCNI,CCT…
hsa-miR-155_star	ABLIM3,ACTR10,ARPC5,AZGP1,BMPR1B,C10orf129,C14orf37,C19orf68,C1orf216,C9orf43,CA14,CALCA,CCDC65,CCDC96,CCL13,CDC27,CIRBP,CLCA1,CNTRL,CYP4A11,DOCK8,DYNC1I2,EIF2C3,ELOVL5,ENSA,FRA10AC1,FRMD4A,GBA2,GNRHR2,GP6,GPBP1,HMBS,HNRNPH2,IFIT1,IGFBP1,KCTD3,KIF26B,LAMA1,LARP6,LINGO2,LTB,MAPK13,MARCO,MED23,MMP20,MOS,NDUFA5,NGRN,NLRP9,NUP133,OR12D2,OR2U1P,OR9Q1,OSBPL7,P4HA2,PCDH15,PIR,PLSCR2,PPP1R9A,PSMG3,RNF20,…
hsa-miR-15a	A4GNT,AADAT,AARS,ABCF2,ABI2,ACAA1,ACAD9,ACOX3,ACTC1,ADAM12,ADAMTSL1,ADAP1,AHNAK2,ALKBH3,ANAPC1,ANKRD13D,ANKS4B,ANO7,AP2A1,APOD,APOO,APTX,AQP11,ARHGAP18,ARMCX2,ARPP21,ASB1,ASNSD1,ASPHD2,ATCAY,ATG9A,ATN1,ATP13A2,ATP6V0B,ATXN2,AURKAIP1,AVEN,AVL9,B3GAT3,BAMBI,BANF2,BEST1,BEST4,BIN1,BMX,BOLA3,BPIFA1,BRI3,BRIX1,BRP44L,BSND,C10orf2,C11orf10,C11orf42,C11orf53,C11orf91,C14orf1,C14orf37,C16orf57,C17orf59,C…
hsa-miR-15a_star	AADAC,AGER,AIF1L,AIG1,AKR1B1,ARHGEF38,ASB10,ASL,ATL3,BAI2,BEST3,BTNL8,C11orf2,C14orf133,C17orf47,C1orf172,C2orf27B,C5,C6orf57,CALCOCO1,CASP6,CBX8,CCDC76,CCL1,CCRN4L,CDC42BPB,CDH23,CDHR2,CDY1,CEP89,CHRNA1,CLEC2B,CMTM5,CNPY4,CPEB2,CUBN,CXCR5,CYP2C19,CYP2C9,DAAM2,DAG1,DBT,DCTPP1,DDRGK1,DLX1,DYNLT1,DYRK1B,EDF1,EFTUD2,EGR1,EVC2,F13A1,FAM82A1,FAM83G,FASTK,FBXW4,FGF3,FGF7P2,FUK,GATA1,GBP7,GEMIN2,GLB1,GL…
hsa-miR-15b	A4GNT,AARS,ABCC3,ABCF2,ABI2,ACAA1,ACAD9,ACOX3,ACSL5,ACSS2,ADAM12,ADAMTSL1,ADAP1,ALKBH3,ANAPC1,ANKRD13D,ANKUB1,ANO7,AP2A1,APOD,APTX,AQP11,ARHGAP18,ARHGDIA,ARHGEF25,ARMC6,ARMCX2,ARPP21,ASB1,ASNSD1,ASPHD2,ATCAY,ATG9A,ATN1,ATP13A2,ATP6V0B,ATP6V1B2,ATXN2,ATXN7L1,AURKAIP1,AVEN,AVL9,B3GAT3,BAMBI,BEST1,BEST4,BFAR,BIN1,BMX,BOLA3,BPHL,BPIFA1,BRD1,BRI3,BRP44L,BSND,C11orf10,C11orf42,C11orf53,C11orf91,C14orf1…
hsa-miR-15b_star	ABI1,ADAM2,AGER,AGTR2,AGXT2L1,AHSG,AIG1,ALDH9A1,ALPK1,ARHGEF38,ARPC4,ASB11,ASB3,ASPH,ATP6AP2,BCCIP,BTNL8,C14orf109,C14orf133,C17orf47,C19orf57,C1QL3,C2CD4A,C3orf39,C4orf33,C5,C6orf10,C6orf57,C6orf58,C9orf135,CAMKMT,CASP6,CBX8,CCDC160,CCDC76,CCNI,CDH23,CDY1,CEBPE,CHCHD1,CHRNA1,CLDN17,CLEC2B,CNPPD1,COL14A1,COMMD10,COPS8,COX7A2,CP,CRB1,CUBN,CXCR2,CXorf21,CYP2C19,CYP2C9,DDX60L,DHH,DIMT1,DMGDH,DNMT1,D…
hsa-miR-16-1_star	ACADM,ACPP,AHI1,AIMP1,ALG12,ANXA7,AQP11,ARNTL2,ASH2L,ASPN,ATP6V0A4,AVEN,BICD1,BIK,C16orf61,C1orf134,C1orf50,C20orf173,C5orf15,CALCA,CAST,CCNE1,CCNO,CD36,CDH26,CDH9,CDK7,CEP170,CEP192,CHST11,CHST12,CHTOP,CLSPN,CLVS2,COMMD8,CPXCR1,CRYM,CTNNA3,CUL2,DCTN2,DDAH2,DDRGK1,DDX43,DDX53,DIS3L2,DNTT,EFCAB5,EFTUD1,EIF1AY,EIF5B,ELP4,EMB,FAAH2,FAM114A1,FAM160B1,FAM193B,FAP,FGD1,FKBP3,FMO1,FSHR,FUCA2,GPR182,GPR1…
hsa-miR-16-2_star	ACADM,ACPP,ACSL6,AHI1,AIMP1,ALG12,ANXA7,ARNTL2,ASB11,ASH2L,ASPN,ATP5S,ATP6V0A4,BCL2L11,C12orf11,C15orf55,C1orf43,C1orf50,C5orf15,C7orf61,CAST,CCDC152,CCDC80,CD36,CDH8,CEP170,CEP192,CHMP4C,CHST11,CHST12,CLSPN,CLVS2,COMMD8,CPXCR1,CRYM,CTNNA3,CUL2,DDAH2,DDX43,DDX53,DYM,EFHA1,EFTUD1,EIF1AY,EIF5B,EMB,EXOSC1,FAAH2,FAM114A1,FAM174A,FAM24A,FAP,FBXL21,FGL1,FMO1,FRRS1,FSHR,GK2,GPR182,GPRASP2,GRIA3,HADHB,HE…
hsa-miR-16	A4GNT,AASS,ABCF2,ABHD16A,ABI2,ACAD9,ACOX3,ACOXL,ACTC1,ACVR2A,ADAMTS18,ADAMTSL1,ADM,ADNP2,ADRB2,AMIGO2,ANAPC1,ANKRD13D,ANKRD57,AP2A1,APOD,APOO,AQP11,AQP8,ARHGAP10,ARMCX2,ASB1,ATCAY,ATP13A2,ATP6V0B,ATXN2,AURKAIP1,AVEN,AVL9,B3GAT3,B3GNT2,BATF3,BBS2,BCAP31,BEST4,BLMH,BMX,BOLA3,BPIFA1,BRI3,BRIX1,BRP44L,BSND,C10orf58,C11orf10,C11orf42,C11orf46,C11orf53,C11orf91,C12orf26,C15orf41,C15orf55,C16orf80,C17or…
hsa-miR-17	AADAC,AADAT,AARS2,ABCD3,ABHD11,ABTB1,ACPL2,ADAL,ADHFE1,ADORA2B,ADRA1B,AGAP10,AGAP9,AGFG2,AGMAT,AGMO,ALDH8A1,AMBRA1,AMDHD1,ANKK1,ANKRD44,ANKRD9,APP,ASB9,ASCL3,ASTN2,ATAD2,ATP12A,ATP6V1D,BAMBI,BCAS1,BLZF1,BPHL,BPNT1,BRCA1,BSPH1,BYSL,C10orf76,C10orf93,C11orf1,C11orf54,C11orf82,C12orf41,C12orf43,C12orf65,C15orf40,C15orf44,C19orf2,C19orf39,C19orf40,C19orf45,C1orf63,C21orf58,C2orf47,C2orf56,C2orf76,C5o…
hsa-miR-17_star	ACCS,ADAM33,AFG3L1P,AGER,AMPD1,AP1S1,ARMC6,ASB3,ATP8A2,BBX,C10orf32,C14orf49,C17orf39,C17orf75,C19orf29,CABIN1,CALY,CAPN1,CBLL1,CCDC22,CD27,CENPM,CHN2,CLEC4A,CSNK1E,CWC27,DDX4,DDX47,DHX58,DMAP1,DNAJC25,DONSON,DUS1L,ELMO3,ENTPD2,EPHB2,EXD3,EXOC3L4,FAM21C,FAM71B,FANCB,FHOD1,FIG4,FLNA,GK,GTF2H1,HENMT1,HIF3A,HLA-DRB1,HSD11B2,HSP90AB1,ICAM1,IL5,ILF2,INSL3,KAT5,KCNN3,KIAA1704,KLC1,KLK6,KRT33B,LFNG,LGAL…
hsa-miR-181a-2_star	A2LD1,AARS,ABCA3,ABCG2,ACVR2B,ADHFE1,ADNP2,AEN,AGPAT1,AHCY,AHRR,ALDH1B1,ALG13,ALG14,AMICA1,ANKRD1,APOA1BP,APOC2,ARAP3,ARID4A,ARL10,ASAP1,ATF3,ATOH8,ATP13A3,AXDND1,BCCIP,BIN3,BMP15,BNIPL,BOK,BRD4,BSND,C12orf45,C12orf73,C15orf33,C17orf72,C17orf75,C19orf53,C19orf6,C1orf162,C1orf50,C1orf98,C22orf36,C2orf43,C4orf26,C4orf33,C4orf36,C5orf63,C6orf164,C7orf72,C9orf86,CABP4,CALB2,CARD14,CARS,CASP10,CBLN4,C…
hsa-miR-181a	ABI2,ACTA2,ACTN2,ACYP1,ADA,ADAMTS18,ADCK1,ADCK3,ADORA2B,ADORA3,AKAP4,AMOT,ANKRD22,ANXA6,AP2A2,APOO,AQP11,AQP9,AQR,ARL17A,ARMCX2,ARPC1A,ARPC1B,ARSJ,ASB9,ATG5,ATP5J,AUTS2,AVL9,B3GALT5,BAI3,BARD1,BBS9,BCHE,BDKRB1,BEND5,BMS1,BRAP,BRD1,C10orf68,C12orf51,C12orf56,C14orf135,C14orf178,C16orf53,C16orf95,C18orf55,C19orf59,C1orf131,C1orf43,C1orf50,C20orf106,C20orf29,C2orf29,C3orf14,C3orf23,C3orf62,C4orf47,C…
hsa-miR-181a_star	A2LD1,ABCA9,ABCC11,ACRC,ACSM5,ACTR3,ACTR3B,ADNP2,AGFG2,AHRR,AIRE,AKT2,ALDH4A1,ALDH6A1,ALG14,ANXA1,ANXA13,APOC2,AQP9,ARFIP1,ASPHD1,ATAD5,ATP13A4,AXIN2,BACE2,BBS5,BCL2A1,BEND5,BPHL,BRCA2,BUB3,C12orf45,C12orf52,C12orf62,C14orf166B,C16orf57,C17orf107,C19orf29,C1D,C1orf162,C1orf50,C20orf94,C3orf67,C4orf26,C5orf46,C5orf63,C9orf86,CA8,CADPS,CAPZA2,CARS,CAST,CBWD1,CCDC153,CCNDBP1,CD164L2,CEACAM4,CENPI,CK…
hsa-miR-181b	ABCA1,ABCA12,ABCC3,ABHD16A,ABI2,ACMSD,ACSS1,ACTA2,ACYP1,ADCK3,ADM,AIM1L,AKAP4,ALDH9A1,ANKRD13A,ANKRD22,ANXA10,APOA1BP,APOBEC1,APOL2,APOO,AQP11,AQP9,AQR,ARL17A,ARPC1A,ARPC1B,ARSJ,ASB10,ASB9,ATG5,ATP2A2,ATP6V1H,ATPAF2,AUTS2,AVL9,BAI3,BBS9,BCHE,BDKRB1,BEND5,BEX2,BIN3,BPY2,BRAP,BRDT,BTG4,C10orf68,C11orf31,C12orf51,C12orf56,C14orf178,C16orf53,C16orf95,C19orf59,C1orf131,C1orf43,C1orf50,C20orf29,C21orf2…
hsa-miR-181c	ABI1,ACCS,ACSS1,ACTA2,ACTN2,ACYP1,ADA,ADCK1,ADCK3,ADORA2B,AICDA,AIM1L,AKAP4,AMOT,ANGPT4,ANXA6,AP2A2,APOBEC1,APOO,AQP11,AQP9,ARHGEF17,ARL17A,ARMCX2,ARPC1A,ARPC1B,ARSJ,ASB10,ATRNL1,AUTS2,AVL9,B3GALT5,B4GALNT2,BAI3,BBS2,BBS9,BCHE,BDKRB1,BEND5,BMS1,BNIPL,BRAP,BRD1,BSPRY,C10orf68,C12orf51,C12orf56,C14orf102,C14orf135,C14orf178,C16orf53,C16orf95,C18orf55,C19orf59,C1orf131,C1orf50,C20orf106,C20orf29,C3o…
hsa-miR-181c_star	ABHD12B,ABLIM2,ACSM5,ACTN4,ACTR3B,ACY3,ADCK3,ADPRHL1,AGFG2,AHRR,AKT2,ALDH1B1,ALDH4A1,ALDH6A1,ALG13,ALG14,AMICA1,ANAPC11,ANKUB1,ANXA1,AQP9,ARMC4,ASCL4,ATOH8,ATP4A,AXIN2,AZI1,B3GNTL1,BACE2,BBS5,BCCIP,BEND5,BMPR1A,BPHL,BRE,BUB3,C11orf57,C11orf96,C12orf62,C14orf166B,C17orf72,C1orf50,C2orf43,C3orf67,C4orf33,C9orf24,CAST,CASZ1,CBWD1,CCDC12,CCDC153,CCNDBP1,CDH23,CDK4,CLLU1OS,COX8A,CPXM2,CRKL,CRTAC1,CSRN…
hsa-miR-181d	ABCA1,ABCA12,ABCC3,ACCS,ACMSD,ACTA2,ACYP1,ADCK3,ADM,AGR3,AKAP4,ALDH9A1,ALX3,ANKRD22,ANXA10,APOBEC1,APOL2,APOO,APOOL,AQR,ARHGEF3,ARL17A,ARPC1A,ARPC1B,ARSJ,ASB10,ASB9,ATG2B,ATG5,AUTS2,AVL9,B9D2,BAG2,BAI3,BBS2,BBS9,BCHE,BDKRB1,BEND5,BHLHE40,BPY2,BRAP,BRD8,BRDT,C10orf68,C12orf51,C12orf56,C14orf135,C14orf178,C16orf53,C16orf95,C19orf59,C1orf131,C1orf50,C20orf106,C21orf2,C2orf29,C2orf54,C3orf14,C4orf43,…
hsa-miR-182	AASDHPPT,AATK,ABHD12,ACAA2,ACCS,ACTN1,ADCK4,ADPRHL2,AHSG,AIMP2,ALDH1A1,ALG13,ANAPC5,ANG,ANKHD1,ANKLE2,ANXA13,APBA2,APOB,ARF4,ARHGEF35,AS3MT,ASZ1,ATF1,ATP4B,B4GALT7,BBS12,BBS2,BCL2A1,BCL2L12,BDNF,BFSP1,C12orf44,C12orf52,C12orf73,C13orf33,C19orf21,C19orf26,C19orf63,C1orf112,C20orf111,C20orf24,C2orf42,C2orf89,C4orf21,C5orf22,C6orf103,C6orf118,C6orf125,C7orf46,C8orf37,C8orf58,C9orf23,CACNA2D3,CADPS2,…
hsa-miR-182_star	AARS,ABCC11,ACP6,ACYP1,ADAR,AMZ2,APOA2,ASB14,ATAD3B,BAI2,BDKRB2,BMP6,BNIPL,C10orf2,C10orf91,C1orf129,C1orf141,C8orf34,CAPN9,CCDC81,CCDC94,CCNK,CDH8,CEBPE,CHID1,CIDEC,CYTIP,DHRS7B,DSG4,ECHDC2,EGFR,F2,FABP12,FADD,FAM102A,FAM125A,FAM187A,FAT1,FGR,FIG4,FOXP2,GAST,GBA2,GLIPR2,GMNN,GPAT2,GPATCH1,GPR172A,GPR37,GUCY2C,GYS1,HBXIP,HERC5,HIAT1,HMGB1,HOXB4,ICT1,INPP5B,KLC1,LAMTOR1,LGI1,LRRIQ3,MORN5,MPV17L,MR…
hsa-miR-183	AARS,ABCB10,ACAD8,ACSM1,ADAT3,ADCK1,ADCK2,AKAP12,AKAP4,ALG12,ALS2CR8,ANKRD13C,AOAH,AP2S1,AP3M1,APEH,APOA1BP,AQP11,ARHGAP21,ARMCX5,ASTN1,ATP13A3,ATP5G3,ATP6V0D1,BANP,BRAP,BTG1,BTK,C11orf58,C11orf63,C11orf85,C12orf63,C14orf39,C14orf49,C17orf58,C17orf80,C1orf110,C20orf103,C20orf96,C2orf47,C4orf19,C4orf41,C5orf24,C6orf130,C6orf162,C9orf4,CALCB,CAPN1,CCDC121,CCDC146,CCDC64,CCNDBP1,CD151,CD3E,CD52,CD79…
hsa-miR-183_star	ABHD5,ACOT12,AMTN,ANKRD13D,ASGR2,ATF2,ATG2B,ATP6V1D,BUB1B,C15orf33,C2orf42,C7orf46,CA1,CDH9,CNPPD1,COPB1,CPXM2,CRISP1,CTH,CTSC,DCN,DCTN6,DLX4,ERO1LB,FBXL2,FGD1,FRRS1,GTF2IRD1,GUCA1C,GYLTL1B,HSPA6,IFT43,IL2,KCNH7,KCTD18,KIAA1958,KLHL7,LAMA2,LNX1,LRR1,LRRC63,MCOLN2,MEIG1,MMP12,MMS22L,MNDA,MON2,MSMB,MSRA,MTFMT,NAA38,NFYB,NOG,NOVA1,NOX1,OR2B6,OR2T12,OR2U1P,PABPC5,PDLIM5,PLXNB3,POLQ,POPDC3,PPP3CC,PTH,…
hsa-miR-184	AARS,ABHD16B,ABI3,ACAD10,ACO2,ACRV1,ACSF2,ADCK4,ADPRHL1,ADSL,AFG3L2,AGAP2,AHI1,AKAP17A,AKAP4,AKT2,ALMS1,ALOXE3,ANKRD54,ANO9,AP2M1,APOA4,APOH,ARHGDIA,ARIH2,ARMC6,ARPC2,ASPHD2,ASTN1,ATP2A1,BACE2,BAIAP2L2,BANP,BCAT2,BOD1,BOLA2,BOLA2B,BPIFA2,BRD4,C18orf55,C19orf25,C19orf35,C19orf53,C19orf54,C20orf196,C6orf132,C9orf174,C9orf84,CACNA1H,CACNG6,CADM4,CALR,CAMK2D,CAPNS1,CAPRIN2,CARM1,CCDC127,CCNA2,CCNF,CD…
hsa-miR-185	AAMP,AASS,ABCB9,ABHD16B,ABHD5,ACSF2,ACTN1,AGER,AGXT,AK2,AKAP14,AKR1B10,ALDOC,ANAPC5,ANKRD23,ANKS4B,AOAH,AP3B2,APBA1,APH1A,ARHGAP40,ATP1A3,ATP5B,AWAT2,BATF3,BCAS4,BCAT2,BEND7,BEST2,BICC1,BIK,BPIFA1,C10orf62,C12orf44,C12orf52,C12orf68,C1QC,C21orf67,C3orf19,C5orf48,C6orf105,C9,C9orf43,CACNG1,CAPS,CASP14,CCBL1,CCDC102A,CDH15,CDH24,CDS1,CMTM2,COG1,COX5B,CPNE2,CPNE6,CRABP2,CRYBA4,CTNND1,CTSH,CYFIP1,DCT…
hsa-miR-185_star	A4GALT,ABHD14A,ABTB1,ADAMTS13,ADCK4,ANPEP,AQP5,ARPC1A,ATP13A1,C1orf85,C20orf26,C21orf67,C7orf26,C9orf142,C9orf37,CCDC134,CCDC9,CCHCR1,CCM2,CD180,CHGA,CLDN19,CSNK1G2,DAB1,DDX31,DENND1C,DNHD1,DNM1,DPM2,ECEL1,EEFSEC,ENTPD2,ESRRA,FADS3,FAM178B,FARSA,FMNL1,FPGS,GMPPA,GPR45,HBZ,HSPBP1,IFITM5,IGHMBP2,IGLL1,JMJD7-PLA2G4B,KLK4,KRT1,KRT32,KRT8,LCN12,LMF1,LMX1B,LRP10,LRRC61,MAP4K2,MAPK13,MCF2L,MED25,MMP23B,…
hsa-miR-186	ABCB7,ADAMTS20,ADAMTSL1,ADAT1,AGBL2,AHCYL1,AIFM1,AK7,AKAP5,AKR1B10,ALMS1,ALPK1,AMOT,ANKRD55,AP4B1,APEX1,APOB,APOL2,ARG1,ARHGAP25,ARMC2,ARMCX1,ART3,ASZ1,ATP7B,BCDIN3D,BVES,C11orf58,C12orf56,C14orf109,C17orf79,C1orf63,C3orf33,C4orf17,C6orf221,C7orf23,C7orf26,C9orf171,CA1,CABS1,CAMKMT,CAP1,CAST,CCDC138,CD5L,CD9,CDHR4,CDK9,CENPW,CES5A,CETN2,CLK4,CLPX,CMPK1,CNGB1,CNNM2,CNOT3,COMMD6,COPS7A,COPZ1,COX7A2…
hsa-miR-186_star	ACTRT2,ADCK2,ANP32B,APCDD1L,ARSF,ATP6V1E2,BCDIN3D,BRK1,C10orf57,C11orf41,C11orf48,C11orf52,C12orf44,C12orf45,C14orf105,C14orf109,C19orf21,C20orf24,C2orf89,C3orf49,C6orf106,C9orf68,CASP10,CCDC83,CCNI,CD244,CELF5,CHRNB1,CLN6,CNTN5,COX7A2,CUTA,CXorf59,DCTPP1,DDX20,DEFB1,DOK6,EIF2B5,EMD,FBXW2,FCN1,GNB3,GREB1,HES1,HS6ST1,HSPA12B,IL25,INSR,KAT2A,KCNH6,KCNJ9,KIF2C,KRTAP9-4,LACC1,LRRC41,LRRC63,LRWD1,LSM1…
hsa-miR-187	A1CF,AARS2,ABCB9,ABHD16A,ABI2,ABLIM2,ACE,ACVR2B,AGXT2L1,AHRR,AKAP3,ALDH16A1,ALDH3B2,ALOX5AP,ANKK1,ANXA13,AP4M1,ARID5A,ART1,ART5,ASCC1,ASMT,ATP12A,ATP13A2,ATP2C2,AVEN,B4GALT7,B9D2,BAI1,BAI2,BET3L,BICD1,BTBD9,C10orf137,C10orf35,C12orf48,C14orf102,C16orf74,C17orf58,C17orf74,C17orf81,C19orf44,C1QBP,C1S,C1orf50,C20orf165,C20orf173,C22orf40,C2orf62,C3orf25,CABP4,CACNA2D3,CACNG1,CACNG8,CAPS2,CAPZB,CCDC1…
hsa-miR-187_star	ADAMTSL1,ADAMTSL2,AES,AIDA,ANKMY1,AQP12A,ASB9,ATP6V1G2,C16orf95,C17orf108,C20orf46,C3orf22,C9orf25,CALCA,CAPN1,CCDC56,CDY1,CENPE,CETP,CLCN2,CLEC4M,CMTM8,CNOT1,CNTNAP3B,COLEC11,CRABP1,CSPP1,CUEDC1,CXorf59,DAPL1,DBN1,DERL3,DNM1,EIF3B,FAM193A,FBLN1,GALT,GATA1,GFRA4,GNB5,GNL1,GPAT2,KCNV2,KRT23,KRTCAP2,MAGEB2,MAN2C1,MANEAL,MCPH1,MLLT4,MYB,MYOF,NDUFC1,NOMO1,NOMO2,NPR2,NPSR1,NUCB1,PHF12,PIGF,PIGU,PLK5,P…
hsa-miR-188-3p	AAMP,ACAD10,ACTN1,ADC,ADORA1,AFG3L2,AGPAT1,AKT1S1,AMIGO1,ANO9,APEX2,APOA5,ARFIP2,ARHGAP30,ARHGDIA,ARR3,ARSA,ATG4D,ATG7,ATPAF2,AURKA,AVPR2,AXDND1,AZGP1,B3GAT3,BCL3,BCL9,BOLA2,BOLA2B,BRF2,BRK1,BST2,BTK,C10orf93,C14orf80,C15orf40,C19orf71,C1orf172,C1orf177,C1orf35,C2orf84,C3orf52,C9orf23,C9orf71,CACNA1H,CALCOCO1,CAMK1,CAMSAP3,CARHSP1,CARM1,CBX1,CCDC12,CCDC22,CCL13,CFLAR,CHCHD8,CHI3L2,CHKA,CHORDC1,CH…
hsa-miR-188-5p	ABCF3,ABHD14B,ACTL7A,ADC,AEBP1,AFG3L2,AGXT,AKT1S1,ALPK1,AMIGO1,ANKRD33,ANO7,AP2A1,AP4M1,ARHGAP28,ARHGEF9,ARL6IP4,ARPC1B,ARPC2,ARPC5L,ASNA1,ASS1,ATG16L2,ATG4D,ATP8B5P,ATXN7L3,AVPR2,B4GALT3,BAG6,BAIAP3,BCAN,BCL9,BDKRB1,BIN2,BOLA1,BPGM,C10orf11,C10orf28,C10orf93,C12orf12,C12orf24,C13orf15,C17orf56,C17orf59,C19orf28,C1QC,C1orf177,C21orf63,C22orf26,C2orf84,C2orf89,C6orf145,C7orf26,C7orf53,C9orf23,CACN…
hsa-miR-18a	ABCC2,ABCC3,ABCD2,ABT1,ABTB2,ACAD8,ACAP3,ACER2,ACOT12,ADAMTSL1,ADAP2,ADAT2,ADM,ADRA1B,ALS2CR12,ANAPC10,ANKMY2,ANKRD44,ANUBL1,ANXA13,ANXA7,AQP1,ARAF,ARHGDIB,AS3MT,ASCC2,ATP12A,ATP13A1,ATP6V0E1,B3GALT5,BABAM1,BAMBI,BASP1,BBS9,BCCIP,BEX5,BTG3,C12orf34,C14orf37,C15orf40,C17orf101,C1orf63,C20orf24,C20orf30,C20orf85,C21orf63,C22orf31,C5orf45,C6orf154,C7orf25,C7orf42,C7orf46,C7orf50,C7orf69,CABLES1,CACN…
hsa-miR-18a_star	A4GALT,ADH4,AIFM3,ALDH4A1,ALOXE3,ANKDD1A,ANKRD13D,ANPEP,ARAF,ARAP1,ARHGEF1,ARHGEF25,ARMC6,ATP6V0D1,BRMS1,C10orf125,C12orf52,C15orf27,C19orf10,C19orf28,C19orf70,C21orf2,C2orf82,C6orf47,C9orf43,CALML3,CCDC120,CCDC36,CCDC94,CCS,CCT5,CEACAM19,CEP89,CHGA,CHRNA2,CLN3,COBRA1,CPSF3L,CPT1B,CREB3L4,CRYAA,CRYAB,CYP2A6,CYP4B1,DDX49,DLL3,DNAH12,DOK2,DOT1L,DYRK1B,EDC4,EFNA1,EME2,EML2,ETV7,EVX1,FADS1,FAM176B,FA…
hsa-miR-18b	AADAC,ABCC3,ABI3,ABTB2,ACAP3,ACER2,ACOT12,ACTR5,ADAL,ADAMTSL1,ADAP2,ADAT2,ADM,ADRA1B,AGT,ANAPC10,ANGPTL6,ANKRD44,ANKRD9,ANUBL1,ANXA13,ANXA7,APBB1IP,APCDD1,ARAF,ARHGDIB,ARL6IP1,AS3MT,ASCC2,ASCL1,ATP12A,ATP13A1,ATP2C2,ATP6V0E1,B3GALT5,BABAM1,BAMBI,BBS9,BCCIP,BEX5,BTG3,C12orf34,C15orf40,C17orf101,C1orf63,C20orf24,C20orf30,C20orf85,C21orf63,C22orf31,C5orf45,C6orf192,C6orf72,C7orf25,C7orf42,C7orf46,C7…
hsa-miR-18b_star	A4GALT,ADAM15,ADRB3,AGMAT,AKT2,ALDH4A1,ALKBH6,ALPK1,ANGPTL4,ANKDD1A,ANKRD13D,AP1B1,ARAF,ARAP1,ARHGEF10L,ARHGEF25,ARVCF,ATG9A,ATP5S,ATP6V0D1,BAK1P1,BRMS1,BSPRY,C10orf125,C12orf52,C19orf28,C19orf57,C6orf47,CABIN1,CALML3,CCDC120,CCDC9,CCDC94,CCT5,CEACAM19,CENPV,CHRNA2,CLN3,CPSF3L,CREB3L4,CRYAA,CSNK2B,CSTB,CTSL1,CYP4B1,DOK2,DUOX1,DUSP6,DYRK1B,EDC4,EML2,EPB41L1,ETV7,EXOC3L4,FADS1,FAM110B,FAM187A,FAM83…
hsa-miR-190	AGAP4,AGPS,AMTN,ANAPC10,ANGPTL1,ANGPTL5,ANKAR,ANKRD49,AP1S1,AP1S2,APBB1IP,APCS,ARAP1,ARHGAP15,ARHGAP9,ATF1,ATP1A3,ATP6V0D1,B4GALNT3,B4GALT6,BBS2,BBS9,BCO2,BLVRA,BRAF,BTBD11,C11orf54,C12orf11,C12orf48,C14orf102,C14orf135,C14orf149,C18orf55,C1GALT1,C1GALT1C1,C1orf110,C1orf137,C1orf146,C3orf30,C4orf21,C5orf34,C6orf118,C6orf146,C7orf46,C7orf63,C8orf34,C9orf5,C9orf86,CA4,CACNA1D,CAT,CCDC111,CCDC59,CCL…
hsa-miR-190b	ABHD14A,ACTR3,AGAP4,AGPS,AKR1C3,AMTN,ANAPC10,ANGPTL1,ANGPTL5,ANGPTL6,ANKAR,ANKRD6,AP4S1,APBB1IP,ARAP1,ARFGEF1,ARHGAP15,ARHGAP9,ASPHD1,ASTN1,ATF1,ATP1A3,B3GALT2,B4GALNT3,B4GALT4,B4GALT6,BAI3,BBS2,BLVRA,C10orf112,C12orf11,C14orf102,C14orf135,C14orf149,C18orf55,C19orf34,C1GALT1C1,C1orf146,C20orf111,C20orf85,C4orf29,C5orf34,C6orf118,C6orf146,C7orf31,C7orf63,C8orf34,CA4,CACNA1D,CAPS2,CAT,CCDC111,CCDC5…
hsa-miR-191	ACTA1,ACTR5,ADCK1,AGPAT9,AJAP1,ALB,ALG5,ALS2CR12,AMMECR1L,AP2A1,APTX,ARAP1,ARHGAP9,ARIH2,ARL8A,ARPP21,ASB7,ASTE1,BASP1,BCCIP,BZW2,C10orf46,C10orf57,C11orf74,C15orf17,C16orf88,C17orf85,C1orf88,C1orf94,C2orf42,C2orf72,C6orf118,C6orf192,C6orf221,C7orf23,C8orf42,C9orf150,C9orf43,CALN1,CAND1,CBLN4,CCBL2,CCDC122,CCDC152,CCDC85C,CCS,CD3G,CD81,CDC27,CDCA3,CDKAL1,CDKL3,CENPV,CEP192,CETN3,CHRNB4,CITED1,CLE…
hsa-miR-191_star	ACBD4,AIG1,ANK1,ANKRD24,AP1B1,APBB1IP,ARHGAP22,ATP1B1,BCL7C,C10orf120,C12orf42,C19orf70,C7orf50,CACNB1,CALHM2,CARD9,CCDC70,CDH15,CHST7,CLCN7,COL6A5,CRHR2,CTSZ,CYP2W1,DAB2IP,DDAH2,DHX34,EIF3G,ENG,ENTPD4,EVC2,EXOC3L4,FHOD1,FKBP6,FUBP3,GADD45G,GAS6,GBX2,GTF3C5,HIST2H2AB,HMGB2,IDH2,IFNK,IGSF9B,IRX4,KCNG1,KLKB1,LONP1,LYPLA2,MAD2L2,MAGI1,MCCD1,MCM2,MED24,MKRN2,MMEL1,MOGAT3,MPP3,MRAP,NCF1,NCF1B,NCF1C,NC…
hsa-miR-192	ABCA2,ABCC3,ABCG5,ACAT1,ACO1,ACOT12,ADPRHL2,AKAP10,ALDH2,ALPK1,ALPK3,AMFR,ANGPTL4,ANKRD46,AP3M2,APBB1,ARHGAP36,ARL4C,ASB1,ASB3,ASTL,ATF1,ATG2A,ATG4A,ATIC,ATP1B1,ATXN7,B3GALNT1,BCO2,BLZF1,BMPER,BMPR1B,BRD3,BRIX1,C10orf90,C11orf46,C12orf40,C12orf63,C16orf46,C1D,C1orf111,C2orf28,C3orf19,C4orf26,C6orf70,C7orf66,C9orf93,CACNA1H,CAMSAP1,CARS2,CASQ1,CBLN4,CCDC121,CCDC47,CCNE1,CCNG2,CCNT2,CCR1,CD164,CDC1…
hsa-miR-192_star	ABCC8,AGXT2L1,AIFM1,ATP5G3,AVPR2,BHLHA15,BOC,BRAP,BRCA2,BRF2,C12orf11,C19orf29,C20orf26,CD244,CDH16,CHN1,CIDEC,CLSPN,CMPK1,COQ4,CTNNBIP1,CYP4B1,CYP51A1,DENND1B,DRD5,DYM,EIF4E2,ENO1,FAM160B1,FKBP1A,GABARAP,GNAS,GOLGA1,GPR172A,GRHPR,H3F3A,HHEX,HSF4,IL31,ITFG2,JAM2,KAT7,KCNV2,KRTAP20-2,KRTAP22-2,LCE3D,LCE3E,MCCD1,MED23,MGEA5,NBEAL2,NBPF5,NEFM,NEUROD6,NMS,NUAK1,OR13A1,OR5H2,PAQR9,PARP1,PKP3,PLA2G2E,P…
hsa-miR-193a-3p	ABCB10,ABCF3,ABTB1,ACACA,ACSF3,ACSS2,AFAP1,AGPAT2,AIMP2,AKAP4,ALOX5,ALS2CR8,ANKRD54,AP2M1,ARHGEF26,ARPC4,ARSI,ASB3,ASF1B,ASL,ATG2A,ATG4D,ATP5S,AWAT2,B3GNT6,BAAT,BBX,BCAR1,BCAR3,BCKDK,BEST4,BMP10,BSND,BTBD17,C10orf53,C10orf62,C11orf24,C11orf49,C11orf61,C16orf48,C1QBP,C1QC,C1orf50,C1orf85,C20orf72,C20orf96,C2CD2L,C3orf25,C8orf84,C9orf16,C9orf37,C9orf96,CACNG5,CALHM2,CALHM3,CAMSAP3,CAPN10,CCDC28A,CC…
hsa-miR-193a-5p	AAMP,ABCG5,ABTB1,ACCN1,ACCN4,ACO2,ACRBP,ACSF3,ACSS1,ACTR8,AGBL1,AHDC1,AHNAK,ALKBH6,ALOX12,AMH,AMICA1,ANKRD37,ANO8,ANPEP,APBA3,APOA1BP,APOE,AQP11,ARAP3,ARF5,ARHGAP4,ARHGEF10L,ARHGEF16,ARL6IP4,ARPC2,ATP5D,ATP6V0D1,BCAS2,BCKDK,BCL7C,BIN3,BOLA3,BTBD17,BYSL,BZRAP1,C10orf62,C10orf99,C11orf61,C16orf61,C19orf22,C19orf28,C19orf57,C1QC,C1orf50,C1orf85,C20orf103,C20orf24,C20orf46,C2CD3,C2orf57,C2orf85,C4orf…
hsa-miR-193b	ABCB10,ABTB1,ACCN4,ACSF2,ACSF3,ACSS1,ACSS2,AFAP1,AGPAT2,AHNAK2,AIMP2,AKAP4,ALOX5,ALS2CR8,ANGPTL4,ANK1,ANKRD16,ANKS3,ANO1,ANO8,AP2M1,APBA3,ARF5,ARL6IP4,ARPC4,ARVCF,ASB3,ASL,ATF7IP2,ATG2A,ATP2A3,AWAT2,B3GNT6,B4GALNT3,B9D1,BBX,BCAR1,BEST4,BMP10,BOD1,BTBD17,C10orf125,C10orf53,C11orf24,C11orf49,C11orf61,C11orf9,C16orf48,C1QBP,C1QC,C1orf177,C1orf50,C1orf85,C2CD2L,C2orf57,C3orf25,C6orf64,C8orf84,C9orf96…
hsa-miR-193b_star	AAAS,ABTB1,ACCN1,ACCN3,ACSS2,ADAM30,ALDH2,ALKBH1,ALS2CR12,ANPEP,AOC2,AP1G2,ARHGAP33,ASB10,ATP5D,BMP1,BTD,C14orf180,C15orf23,C16orf61,C19orf75,C1QA,C1orf85,C2orf53,C2orf85,C6orf10,C6orf192,C6orf25,C9orf103,C9orf86,CD37,CDC42EP1,CLCN6,CMTM5,COG7,COL20A1,CPA3,CPNE6,CRCT1,DDAH2,DDX24,DEFB129,DHRS13,DNTTIP1,DPEP3,EDARADD,EFCAB4B,EPHB2,EPS8L3,FAM167B,FBXO25,FCER2,FEV,FGF18,FGFR1,FMNL1,FMO1,FSCN1,G6PC3,…
hsa-miR-194	ABHD10,ACTB,ACTR10,ADHFE1,ADSL,ALDH6A1,ALKBH6,AMIGO2,ANKFY1,AP1B1,APOD,AQR,ARHGAP1,ARHGAP21,ARHGEF35,ARHGEF40,ARSH,ASAP1,ATF7,ATP6V1E1,ATP6V1F,ATP6V1H,AVL9,B3GALT1,B4GALT4,BAMBI,BATF3,BBS2,BCKDHA,BLZF1,BMS1,C10orf93,C11orf41,C11orf9,C12orf26,C12orf40,C13orf27,C16orf95,C17orf101,C18orf32,C18orf54,C1orf122,C1orf135,C20orf196,C22orf39,C2orf28,C4orf29,C5orf32,C6orf118,C6orf228,C7orf23,C7orf58,C8orf4,…
hsa-miR-194_star	ABP1,ACAD11,ADAMTSL1,AKAP3,ALDH3A1,ALG12,ALKBH3,ALPK2,AP2S1,ARID5A,ARSF,BCKDHA,BZW2,C11orf53,C19orf80,C20orf134,C9orf68,CCDC157,CGA,CIDEB,COL7A1,COLEC11,CRCT1,CRHR1,CTRC,CXCR3,DDAH2,DDR1,DNAL4,DPEP1,DYNLT3,EIF6,EME2,FAM40A,GBGT1,GNB2,GTF3C1,HBG2,HIC1,HOXD11,IFI44L,ITGA5,KAT5,KCNAB2,LFNG,LRFN4,MAL,MAP6,MCM5,MPP1,MRPS18A,MYBPC2,NCKAP1L,NXF1,OPTN,OSGIN1,PHKG2,PI16,PIGL,PIN4,PLCD4,PRAF2,PRDM14,PRPF31…
hsa-miR-195	A4GNT,ABHD16A,ACAD9,ACOX3,ACTC1,ADAMTSL1,ADNP2,ADRB2,AHNAK2,AMIGO2,ANAPC1,ANKRD13D,AP2A1,APOD,APOO,AQP11,ARHGAP18,ARMCX2,ASB1,ASNSD1,ASXL1,ATP10B,ATP6V0B,ATXN2,AURKAIP1,AVEN,AVL9,BATF3,BCAP31,BEST4,BIN1,BMX,BPIFA1,BRF2,BRI3,BSND,BTN1A1,C10orf128,C14orf180,C15orf55,C17orf59,C19orf46,C20orf46,C20orf96,C2orf42,C6orf103,C7orf59,C8orf42,C9orf3,CA14,CAPZA3,CASZ1,CBFA2T3,CBLC,CCDC19,CCDC28A,CCDC81,CCL4,…
hsa-miR-195_star	AGAP6,APOOL,ATP6V0A4,BCHE,BTG3,C1orf134,C22orf42,C6orf47,CAST,CCDC76,CDKL4,COMMD8,CTSZ,DCAF6,DDAH2,DSG4,DYM,EFTUD1,ENSA,FAM114A1,FANCE,GABPB1,GK2,GPR182,GRIA3,GSTA5,HIPK1,IL22,INSL5,INTU,KCNV2,KLF2,KRTAP4-5,LINGO2,LTB,LTV1,MFN2,MIPOL1,NFKBID,OR6C2,PIGP,RGS4,RNF6,RRAGB,SLC6A15,TMEM116,TTC32,VEGFC,WISP2
hsa-miR-196a	ABCB9,ABHD3,ACADVL,ACCS,ACOT12,ACP6,ADAD1,AGPAT4,AGXT2L1,AK7,AKIRIN1,AKR1B10,AKTIP,ALDH6A1,ALG14,ANKRD33,ANXA1,APCS,APOB,ARAP1,ARAP3,ARHGEF10L,ARSJ,ASB3,ATAD5,ATP13A2,AUH,AVIL,BEST1,BEST2,BEST3,BPIFB3,C10orf137,C11orf85,C12orf48,C14orf2,C15orf23,C17orf47,C19orf25,C19orf52,C19orf80,C1orf194,C2,C20orf54,C22orf23,C22orf28,C2orf40,C4orf33,C6orf115,C6orf94,C7orf62,C9orf5,CABP4,CALHM2,CALM3,CALML5,CASK…
hsa-miR-196a_star	AATK,ABHD16A,ALOX15,ALPK2,ALS2CR8,ANKRD33B,AP4B1,ASPDH,BAG3,BBS2,BBX,BPTF,BRF1,BRP44,C1GALT1,C9orf169,CA4,CACNA2D1,CBR3,CCNT2,CDC37L1,CENPH,CHI3L2,CLPP,CRIP1,CYFIP1,DPYS,E4F1,EIF1B,EIF2B2,EIF3C,EIF3CL,ESYT3,FAM189A2,FAM198B,FAM53A,GEMIN8,GPRASP1,HIST1H2BM,HIST2H2AB,HNRPLL,HTR3D,INO80C,INPP1,KLHDC9,KLHL38,KLHL4,LAMA1,LRRC10,LY6D,LYRM1,MANSC1,MCM5,MCTS1,MYL12A,MYO16,NF1,NGFRAP1,NPPA,NRP2,NXT1,OR2C1…
hsa-miR-196b	ABCB9,ACAD8,ACADVL,ACCS,ACOT12,ADAD1,AGPAT4,AGXT2L1,AKNA,AKR1B1,AKR1B10,AKTIP,ALDH6A1,ALDOB,ANKRD33,ANXA1,AP2S1,APCS,APOB,ARAP1,ARAP3,ARHGEF10L,ASB3,ASPHD1,ATP13A2,ATP2C1,ATP5C1,AUH,AWAT1,AXDND1,BEST1,BEST2,BPIFB3,C10orf137,C11orf85,C12orf48,C12orf60,C14orf109,C14orf2,C15orf23,C17orf47,C19orf39,C19orf80,C1QTNF9B-AS1,C2,C20orf54,C22orf28,C2orf40,C4orf33,C6orf115,C9orf116,C9orf5,CABP4,CALHM2,CALML5…
hsa-miR-197	A4GALT,AAAS,ABCA7,ACAA1,ACADS,ACTRT2,ACVR1,ADAMTS13,ADAMTS8,ADAT2,AFF4,AHSG,AIRE,AMD1,ANKRD16,ANKRD44,ANKS3,ANXA6,ARHGAP22,ASCC1,ATF6B,ATOH8,ATP5SL,ATP6V1B1,AUP1,B3GALT6,B3GAT1,B3GNT8,B4GALNT3,BCAR1,BCL2L12,BLVRA,BMP15,BTBD2,C11orf1,C12orf24,C15orf38,C16orf74,C1QC,C1orf127,C5AR1,C6orf126,C6orf154,C7orf43,C7orf45,C9orf78,CALCA,CAPS,CASZ1,CCDC64B,CCDC77,CD101,CD300LG,CD70,CDK10,CDK5RAP1,CDY2A,CEP55…
hsa-miR-198	ABCB9,ABCC10,ACAD8,ACHE,ALDH2,ALOX5AP,ALPL,ANKRD33,ANKZF1,AP2S1,AP3B2,APEH,APH1A,APOA1BP,APOBR,ARAP3,ARHGAP19,ARHGEF4,ARIH2,ARL6IP1,ATP1A1,ATP1A3,ATP4A,ATP5B,ATP6V0A4,B4GALNT3,B9D2,BAG3,BAI3,BARX1,BAX,BIRC7,BRD1,BSND,C10orf129,C11orf86,C12orf41,C14orf135,C15orf48,C16orf71,C16orf74,C17orf58,C19orf25,C19orf28,C1orf162,C1orf31,C1orf68,C20orf24,C22orf40,C2orf57,C3orf25,C9orf43,CAMP,CAPN13,CAPN9,CBS,C…
hsa-miR-199a-3p	ACAT1,ACOT12,ACOX3,ACTA2,ACYP1,ADAM22,AEBP2,AGPAT9,AGT,ALG8,ALPK1,AMBP,AMBRA1,AMZ2,ANKAR,ANKRD6,AP2A1,APLNR,AQP8,ARHGAP21,ARHGEF3,ARHGEF4,ARHGEF7,ARID5A,ATG2A,ATOH7,ATP13A2,ATP5C1,ATP6V0B,ATP6V1H,ATXN7L2,BCAR3,BCL2L14,BPIFB2,BTN2A2,BUB1B,C10orf2,C11orf82,C15orf24,C15orf43,C16orf7,C16orf95,C17orf56,C19orf68,C1orf182,C1orf35,C22orf28,C2orf72,C3orf37,C3orf39,C6orf146,C6orf62,C7orf36,C9orf116,C9orf23…
hsa-miR-199a-5p	AADAT,ABCA6,ABCC3,ACAA1,ACE,ACP2,ACP6,ACPT,ACTL7A,ADPRHL1,AEBP1,AFG3L2,AGBL5,AMICA1,ANO10,AOC3,AP2A1,APBB1,APLNR,ARHGAP4,ARID5A,ARIH2,ARL6IP4,ASPHD1,ATG2A,ATG4D,ATG9A,ATP13A2,ATP6V1H,ATPAF2,B3GALT1,B3GNT1,BAIAP2L2,BATF,BCAM,BCAN,BLZF1,BMP3,BNIP1,BUB1B,C10orf122,C10orf53,C11orf54,C11orf82,C11orf84,C11orf9,C14orf159,C14orf166B,C14orf80,C15orf24,C16orf80,C16orf92,C17orf72,C19orf10,C19orf12,C19orf20,…
hsa-miR-199b-5p	AADAT,ABCA6,ABCC3,ACAA1,ACE,ACP2,ACP6,ACPT,ACTL7A,ADPRHL1,ADSSL1,AEBP1,AGBL5,AKAP4,AMICA1,ANO10,AP2A1,APBB1,APLNR,ARHGAP21,ARID5A,ARIH2,ARRB2,ASPHD1,ATG4D,ATG9A,ATP13A2,ATP6V1D,ATP6V1H,AXDND1,B3GALT1,B3GNT1,B4GALNT2,BAIAP2L2,BCAM,BCHE,BEND7,BLZF1,BMP3,BNIP1,BPIFC,BTN2A2,C10orf122,C11orf54,C11orf9,C14orf159,C14orf80,C15orf24,C16orf92,C17orf72,C19orf20,C19orf53,C1QL3,C1orf105,C1orf192,C20orf46,C21o…
hsa-miR-19a	AACS,ABCB1,ABCB7,ABCC3,ABHD14B,ABHD5,ACOX3,ACTN1,ADSS,AGR3,AHSA1,ALG13,ALKBH2,ALPK1,ALPK2,ANAPC10,ANKRD22,ANXA10,ANXA7,ARFGEF1,ARHGEF26,ARMCX1,ARNTL2,ARPC2,ASB7,ASB9,ASNA1,ATG4D,ATP10A,ATP12A,ATP6V0E1,B3GALNT2,B9D1,BAMBI,BARD1,BAZ1A,BBS2,BCL2L14,BCL3,BCL7A,BNIP1,BSND,BTG1,BTG4,C10orf128,C11orf96,C12orf48,C13orf33,C14orf149,C15orf24,C16orf52,C19orf52,C1D,C1QL1,C1orf43,C1orf63,C20orf123,C20orf46,C2…
hsa-miR-19a_star	ACAA1,AKNA,ALDOC,ALKBH2,AMACR,AMY1B,ANKRD20A4,ARID1A,ASAH1,BMPR1A,BPIFB2,C10orf28,C15orf59,C17orf81,C19orf2,C20orf187,C20orf26,C6orf94,C7orf33,C9orf153,CACNA1G,CARD14,CCDC41,CCDC62,CCDC96,CD180,CDC40,CDKL3,CER1,CLCN6,CLSPN,CMTM8,CNOT10,COPS2,COPS4,CPT2,CRCT1,CRISP2,CTNNAL1,CXCR6,CYP7B1,DDC,DDX24,DHX58,DMGDH,DMRT3,DNAJC28,DNM1L,DOC2A,DOCK11,DZANK1,ECI2,EIF2AK4,ERAS,EXO1,FAM110B,FAM150A,FAM167B,FAM…
hsa-miR-19b-1_star	ACAA1,ACOT13,ADAM7,AKNA,ALDOC,AMACR,ATP2B3,C10orf28,C19orf10,C1orf192,C1orf94,C20orf187,C20orf26,C2orf48,C6orf94,C7orf33,C8B,C8orf47,C9orf153,C9orf40,CACNA1G,CARD14,CCDC41,CCDC62,CCDC96,CCNI,CD27,CDKL3,CDKN2C,CELF5,CEP57L1,CER1,CLCN6,CMTM8,COPS2,COPS4,CPT2,CWC15,CXCR6,DDC,DDX24,DDX47,DHX38,DMGDH,DMRT3,DNM1L,DOC2A,DUSP19,ECI2,EFHC1,EPO,ERAS,ERN2,EXO1,FAM110B,FAM150A,FAM167B,FAM89B,FANCG,FASTKD5,FC…
hsa-miR-19b-2_star	ACAA1,ACOT13,ADAM7,AGXT2L1,AKD1,AKNA,ALDOC,AMACR,AMY1B,ASH2L,ATP2B3,C12orf60,C15orf48,C17orf81,C19orf10,C19orf2,C1orf192,C1orf94,C20orf187,C20orf26,C2orf48,C6orf192,C6orf94,C7orf33,C8B,C8orf47,CACNA1G,CARD14,CCDC41,CCDC62,CCDC96,CCNI,CCRL2,CDK7,CDKL3,CDKN2C,CELF5,CEP57L1,CER1,CLSPN,CMTM8,COPS2,COPS4,CPT2,CSAD,CSAG1,CXCR6,DDC,DHX38,DMGDH,DNAH2,DOC2A,DOCK11,DUSP19,DYNC2H1,ECI2,EGF,EPO,ERAS,ETNK1,EX…
hsa-miR-19b	AACS,ABCB1,ABCB7,ABCC3,ABHD5,ACCN4,ACOX3,ACTN1,AGR3,AHSA1,AKIRIN2,ALG13,ALKBH2,ALPK1,ALPK2,ANAPC10,ANXA10,ANXA7,ARHGEF26,ARMCX1,ARNTL2,ARPC2,ARSA,ASB7,ASB9,ASNA1,ATG4D,ATP12A,ATP6V0E1,B3GALNT2,BAMBI,BARD1,BBS2,BCL2L14,BCL3,BEND5,BNIP1,BRE,BRP44,BSND,BTG1,BTG4,C10orf128,C11orf96,C12orf48,C13orf33,C14orf149,C15orf24,C16orf52,C19orf52,C1D,C1QL1,C1orf43,C20orf123,C20orf46,C2orf42,C2orf43,C5,C5orf32,C…
hsa-miR-200a	ABCB10,ABCB8,ACAD8,ACBD4,ACO1,ACOT7,ACOX1,ACP2,ACP5,ACPL2,ACSS2,ACTA1,ACTR6,ADAM20,ADAM23,ADAMTS2,ADAMTS8,ADHFE1,ADNP2,ADORA3,AGA,AGBL1,AGFG2,AHNAK,ANGPTL5,ANKRD29,ANKRD33,AP3S1,APBB2,APOH,AQP10,AQP11,AQP8,ARMC9,ART5,ATAD2B,ATIC,ATP13A2,ATP6V0D2,ATP6V1E2,ATP8A1,ATP8A2,ATRN,ATXN7,AVEN,AVPR1A,B3GALNT2,B3GNT2,B3GNT5,BAG2,BCL9,BIN1,BMX,BRD4,C10orf137,C10orf47,C10orf93,C11orf54,C12orf40,C12orf5,C14orf…
hsa-miR-200a_star	ABLIM3,ABRA,ADCY3,AFP,ANKRD56,AP4B1,ARG2,ARHGAP4,ARPC3,ATXN3L,BCCIP,BEX1,BLNK,BMP3,C10orf62,C10orf68,C1orf127,C1orf172,C1orf201,C2orf89,C6orf170,C8orf12,C9orf96,CBX8,CCDC146,CCDC147,CCDC65,CCK,CEP70,CHI3L2,CHST12,CKS2,CLIC1,CMAS,COL23A1,COMMD7,CPOX,CPXCR1,CRH,CRHBP,CRTC1,CTSL1,CTSL2,CXorf26,CYP26A1,DAP3,DCAF4,DCBLD1,DCPS,DDAH2,DDX10,DHDDS,DHH,DHRS13,DPP6,DZIP3,EBI3,EFEMP1,EFHA1,EGFL6,EIF1B,EPB41,…
hsa-miR-200b	ABI2,ACOT7,ACP5,ACTA1,ADHFE1,AIG1,AKNA,ALS2CR8,AMPD1,ANK3,ANKRD57,ANLN,ANO8,ANP32B,AP1M1,APAF1,APBB2,APOH,APOO,ARHGAP19,ARIH1,ARIH2,ART5,ASB4,ASCC3,ASF1A,ASPN,ASRGL1,ATP13A3,ATP2A2,ATP2C1,ATP5A1,ATP5B,AVEN,BAG2,BAG6,BASP1,BICC1,BLZF1,BMP15,BNIP2,BPGM,BRF2,BRMS1L,C10orf46,C10orf93,C11orf61,C11orf95,C12orf39,C12orf4,C12orf40,C12orf51,C14orf37,C14orf39,C14orf49,C16orf74,C17orf109,C17orf57,C17orf75,C…
hsa-miR-200b_star	ABLIM3,ABRA,ADCY3,AFP,ALX1,AMMECR1,ANKRD56,AP4B1,APOBEC3B,ARG2,ARHGAP4,ARID4B,ATM,ATXN3L,BEX1,BLNK,BMP3,C10orf62,C10orf68,C12orf5,C1orf127,C1orf172,C1orf201,C1orf35,C2orf54,C6orf105,C6orf170,C7orf11,C8orf12,C9orf96,CAPZA2,CBX8,CCDC146,CCDC147,CCDC40,CCDC60,CCDC65,CCK,CDH10,CHST12,CLCNKA,CLCNKB,CLIC1,CMAS,CNOT8,COL23A1,CPD,CPOX,CPXCR1,CRHBP,CRTC1,CRYBA1,CTSL1,CTSL2,CXorf26,DAP3,DCAF4,DCBLD1,DDAH2,…
hsa-miR-200c	AARS,ABI2,ACOT7,ACTA1,ADAM20,ADAM23,AIG1,ALS2CR8,ANK3,ANLN,ANO8,ANP32B,AP1M1,APBB2,APOH,APOO,AQP11,ARHGAP19,ARHGEF26,ARHGEF3,ARIH1,ASB4,ASCC3,ASF1A,ASPN,ASRGL1,ATP13A3,ATP2A2,ATP2C1,ATP5B,AVEN,BAG6,BAP1,BASP1,BBS12,BIN1,BLZF1,BMP15,BRMS1L,BTD,C10orf93,C11orf61,C11orf95,C12orf4,C12orf40,C12orf51,C14orf37,C15orf61,C17orf57,C17orf75,C18orf19,C19orf2,C1GALT1,C1orf63,C20orf196,C20orf29,C2orf42,C2orf76…
hsa-miR-200c_star	ABLIM3,ADCY3,ADRA1A,AFP,AIM1,ALX1,ANKRD56,AP4B1,ARG2,ARID4B,ART1,ATXN3L,AZI1,B4GALNT2,BCCIP,BCL2L10,BEND6,BEX1,BOLA3,BPHL,C10orf62,C10orf68,C12orf44,C17orf62,C19orf43,C1orf35,C1orf94,C3orf20,C8orf12,CALR,CBX8,CCDC106,CCDC146,CCDC147,CCDC40,CCDC65,CD27,CD40,CHFR,CHI3L1,CLCNKA,CLCNKB,CLIC1,CMAS,CPXCR1,CRH,CRHBP,CRTC1,CTSL1,CTSL2,CXorf26,CYP26A1,DBR1,DCPS,DHDDS,DHH,DHRS13,DISC1,DLD,DPP6,EFEMP1,EGFL6…
hsa-miR-201	ABCC3,ABCC5,ABI3,ADPRHL2,AGPAT9,AGTR2,AKAP14,ALDH1L1,ALKBH3,AMICA1,ANKRD53,ANXA9,AQR,ARL13A,ARMC2,ASB2,ASB9,B3GAT3,BBS4,BRS3,C10orf28,C11orf84,C14orf133,C14orf39,C15orf44,C16orf61,C16orf74,C17orf101,C17orf75,C1orf112,C1orf115,C1orf131,C1orf182,C20orf173,C3orf39,C3orf54,C4orf17,C8B,CACNA2D3,CACNG1,CAST,CBWD1,CBWD2,CBWD3,CBWD5,CBWD6,CBWD7,CBY1,CCDC37,CCDC42B,CCDC77,CCHCR1,CCT8L2,CD151,CD72,CEACAM20…
hsa-miR-202	AARS,ABR,ADA,ADRA1B,AHSA1,AIP,ALDH6A1,ALG5,ALOX5AP,ANAPC10,AP3B2,APOBEC2,AQP11,ARHGAP15,ARHGAP22,ARHGAP30,ASCL4,ATP12A,ATP5G2,ATP6V1B1,ATPAF2,ATXN10,AVIL,BANF1,BCAS2,BLZF1,BPIFA1,C10orf95,C11orf54,C11orf85,C12orf56,C13orf26,C14orf149,C18orf21,C1orf144,C1orf74,C20orf26,C20orf85,C21orf33,C2orf40,C4orf7,C9orf86,CAPN6,CARD10,CCDC129,CCDC146,CCDC39,CCDC59,CCDC71,CCKBR,CELSR2,CEP164,CEP290,CEP76,CETN1,…
hsa-miR-202_star	ACAA1,ACPP,ADCK3,ADD2,ADRA1A,AKD1,ALG8,ALOX5,APOO,ARRDC4,ATG12,ATG4C,ATL1,ATP10A,ATP12A,AUH,B4GALNT2,BMPR1B,C17orf75,C18orf55,C1QL3,C1orf174,C1orf177,C22orf25,C6orf123,C8orf83,CCDC129,CDC123,CDC42BPA,CDCA7L,CELA3A,CENPW,CHTF18,CIB3,CNPPD1,CPPED1,CRISP2,CTSL1,CWF19L2,CYP26C1,DBC1,DCHS2,DDAH2,DDB2,DHDDS,DNTT,DOCK2,DSG2,DYSF,E4F1,ECHDC1,ESAM,FAAH,FAT1,FBXO2,FNBP1L,FRG1B,GDA,GEM,GPR161,HBXIP,HCFC1R1,…
hsa-miR-203	ABHD14A,ACMSD,ACO2,ACVR1,ADAM20,AGK,ALDH1A3,ALG5,ALS2,AMPD1,ANKRD18B,ANKRD37,APBB1IP,APLP1,ARNTL2,BARD1,BCAR3,BOLA3,BPIFB2,BPY2,BRP44L,C10orf137,C12orf43,C1S,C1orf131,C1orf141,C1orf172,C20orf24,C2CD3,C2orf40,C2orf80,C4orf29,C4orf37,C6orf118,C6orf146,C7orf11,C7orf25,C7orf28B,C7orf42,C8B,C8orf33,CASC1,CBS,CCBL2,CCDC19,CDKN2C,CENPC1,CENPL,CEP78,CHCHD8,CHD1L,CITED2,CLUL1,CNOT10,COPS4,CR2,CREB3L4,CXor…
hsa-miR-204	AAMP,ABCB6,ABL2,ACIN1,ACOX3,ACP5,AGPAT2,AIMP2,AK2,AKAP1,AP1S1,APLNR,APOM,ARHGAP10,ARHGAP22,ARID3B,ARMC3,ARPC1B,ARRB2,ASS1,ATF2,ATN1,ATP13A4,ATXN7L3,B4GALNT2,BIN2,BPIFC,BTBD16,BZW2,C11orf34,C11orf86,C15orf27,C15orf38,C17orf64,C19orf56,C1orf167,C20orf46,C21orf2,C3orf22,C6orf57,C7orf26,C9orf23,C9orf68,CA11,CAMK1,CATSPER2,CBLN1,CCDC107,CCDC8,CCL17,CCNT2,CCR10,CCS,CDCA2,CEACAM21,CEP120,CHRND,CLDN14,CL…
hsa-miR-205	ABCD1,ABI2,ACADS,ACP5,ADAM23,ANGPT4,ANKZF1,AP2A1,AP4M1,APH1A,ARHGAP19,ARHGAP22,ARL4D,ATP13A5,ATP1A1,ATP2A3,ATP6V1B1,B3GNT8,B4GALT3,B4GALT6,B9D1,BAHCC1,BET3L,BIN2,BSND,C10orf68,C10orf71,C12orf43,C12orf63,C15orf27,C17orf101,C17orf108,C17orf81,C19orf56,C20orf111,C20orf29,C22orf36,C3orf27,C6orf47,C9orf153,CALML5,CAMK2D,CAT,CBR3,CCDC107,CCDC12,CCDC147,CCDC81,CCDC86,CCL13,CCL27,CCM2,CCR7,CCT3,CDH16,CDK…
hsa-miR-206	AADACL4,ABCB7,ABCC10,ABHD6,ACER2,ACRBP,ACSF2,ACTN1,ADK,ADSS,ALKBH2,ANKRD29,ANKRD37,ANP32B,AP1S1,AP2A1,AP4B1,APIP,APOOL,ARAP3,ARMC3,ARPC3,ASH2L,ASL,ASPHD1,ASRGL1,ASZ1,ATXN10,AVIL,AXDND1,BMS1,BPIFB4,BSCL2,BYSL,BZRAP1,C11orf61,C12orf11,C17orf62,C1orf49,C1orf85,C20orf30,C22orf28,C2orf40,C2orf71,C5orf51,C6orf115,C6orf211,C7orf11,C7orf23,C7orf61,C9orf82,CAGE1,CAMKMT,CBY3,CCDC101,CCDC146,CCDC53,CD37,CD7…
hsa-miR-208	ABCB7,ACRV1,ACSS3,ADAT2,ADCK2,AGR3,AKNAD1,ALDH18A1,ALG14,ALS2CR8,AMN1,ANUBL1,AP4B1,APBB2,APC,BOD1L,BPHL,BPTF,BRD8,BRI3,C12orf48,C13orf27,C16orf61,C17orf79,C19orf44,C1orf50,C20orf196,C2orf29,C6,C6orf221,C8orf76,CACNA1B,CACNG7,CAMKMT,CAV2,CBWD1,CBWD3,CBWD5,CBWD6,CCDC28A,CCDC56,CCDC71,CCNB2,CD69,CD9,CDC7,CDCA3,CDH8,CDK1,CDK11A,CDK8,CDKL3,CDY1B,CECR2,CEP152,CETN2,CFDP1,CHST1,CISD2,CLIC6,CLLU1OS,COMMD…
hsa-miR-208b	ABCC2,ACLY,ACSS3,ADAT2,AKNAD1,ALG14,ALS2CR8,AMN1,APBB2,APPL1,ARL6,ATP2B4,ATP6AP2,BPHL,BPTF,BRD8,C11orf1,C12orf48,C13orf27,C16orf61,C17orf79,C20orf196,C2orf29,C2orf76,C6orf221,C6orf48,C8orf76,CACNA1B,CACNG7,CAMKMT,CAV2,CBWD1,CBWD3,CBWD5,CBWD6,CCDC56,CCDC71,CD164,CD9,CDC7,CDH8,CDK1,CDK8,CDKL3,CDKN2D,CDY1B,CECR2,CEP152,CEP70,CETN2,CHST1,CHURC1,CLLU1OS,CNKSR2,CNTNAP4,COMMD10,COPB1,COQ2,COQ3,CRKL,CSNK…
hsa-miR-20a	AADAC,AADAT,AARS2,ABCD3,ABHD11,ACOT9,ACYP1,ADAL,ADM,ADORA2B,AGAP10,AGAP9,AGFG2,AGMAT,AGMO,AGTPBP1,AIM2,ALDH8A1,AMBRA1,ANGPTL5,ANKK1,ANKRD29,ANKRD44,ANKRD9,ANUBL1,ASB9,ASCL3,ASTN2,ATAD2,ATP12A,ATP6V0E1,BAMBI,BCAS1,BLZF1,BPHL,BPNT1,BSPH1,BTG3,C11orf54,C11orf82,C12orf11,C12orf43,C12orf65,C15orf40,C15orf44,C16orf89,C19orf2,C19orf40,C19orf45,C1orf43,C1orf63,C2orf47,C2orf56,C2orf76,C5orf45,C6orf132,C6o…
hsa-miR-20a_star	ACOT12,ADK,ADRBK2,ADSS,ALG8,ALKBH8,ALOX5AP,ANKRD1,ANXA3,APTX,AQP5,ARMC2,ARTN,ASAP2,ATP5A1,ATP6V1G3,B2M,BAG3,BRIP1,BRIX1,C10orf107,C10orf28,C11orf85,C12orf50,C14orf37,C19orf29,C1R,C22orf24,C3orf54,C8orf34,C9orf46,C9orf85,CADPS2,CAPN2,CARD14,CBR1,CC2D2B,CCNA1,CCNO,CD180,CD300LD,CEP72,CFHR3,CHAC2,CHN2,CLEC2A,CNTRL,COG8,COX7A2L,CREM,CRYL1,CSHL1,CUEDC1,CXCR7,CYP2G1P,DACH2,DAZ2,DBP,DDX24,DDX4,DDX5,DHDD…
hsa-miR-20b	AADAC,AADAT,AARS2,ABCD3,ABHD11,ABHD15,ACER1,ACOT9,ACPL2,ACYP1,ADAL,ADM,ADORA2B,AGAP10,AGAP9,AGMAT,AGMO,AIM2,ALDH8A1,ALKBH4,AMBRA1,AMDHD1,ANGPTL5,ANKK1,ANKRD44,ANKRD9,ASB9,ASCL3,ASTN2,ATAD2,ATP12A,ATP6V0E1,BAMBI,BCAS1,BLZF1,BPHL,BPNT1,BRCA1,BSPH1,BTG3,BTN1A1,C10orf76,C11orf1,C11orf54,C11orf82,C12orf11,C12orf65,C15orf40,C16orf89,C19orf40,C19orf45,C1orf43,C1orf63,C2orf47,C2orf56,C2orf76,C5orf45,C6or…
hsa-miR-20b_star	ACACB,ACTRT1,ADPRHL2,AFG3L1P,AFMID,AKIP1,ALG8,ANKRD58,AP3S1,ARMC6,ARTN,ASB16,ATCAY,ATP5S,ATP6V1G3,ATP8B3,BRIP1,BST1,C10orf28,C10orf82,C19orf29,C1R,C1orf101,C21orf49,C22orf15,C8B,C9orf46,C9orf85,CA6,CAGE1,CASS4,CBLL1,CBR3,CC2D2B,CCDC130,CCDC132,CCT8L2,CD180,CD27,CD300LD,CDHR4,CELF5,CFHR3,CGA,CHN2,CLEC2A,CLEC4G,CNIH4,COPS7A,COPS8,COX7A2L,CSHL1,CUEDC1,CYP19A1,CYP2G1P,DDX24,DDX47,DDX5,DMXL2,DNAH2,DNA…
hsa-miR-21	ABCA1,ABHD12B,ACAT1,ACN9,ACTA1,ACYP1,AIF1L,ALDH1A1,ALX1,ANAPC1,ANKRD37,ANKRD42,ANKRD55,ANXA1,AP1AR,APEH,APOB,ARHGAP31,ARL14,ARL4D,ARMC2,ARMCX1,ARMCX5,ARSH,ASPN,ATP13A4,ATXN2,BANK1,BBS12,BEST2,BEST3,BMS1,BPI,BRD1,BTK,C10orf137,C11orf46,C16orf70,C1orf49,C1orf9,C5orf44,C6orf10,CACNG1,CCDC14,CCDC142,CCDC64,CCDC77,CCL1,CCL20,CCL22,CCNA1,CCR7,CD48,CDC37L1,CDK2AP1,CDY2A,CENPH,CEP120,CEP152,CEP192,CEP290…
hsa-miR-210	ABCD1,ABHD2,ABL2,ABTB1,ACTC1,ACTL7A,ADCY7,AGPAT2,AHRR,ALDH4A1,AMBN,ANKS3,ANO2,ARHGEF17,ARMC4,ASL,ATP1B1,ATP2B3,ATP6V0C,B4GALT7,BAIAP3,BCAS2,C10orf122,C11orf2,C11orf58,C18orf10,C19orf59,C1QTNF4,C1orf111,C1orf116,C1orf222,C20orf103,C3orf30,C6orf125,C6orf145,C6orf57,CALCOCO1,CCDC146,CCDC17,CCDC24,CCDC53,CCKBR,CCT3,CD22,CD276,CD300LD,CD55,CD8A,CDX2,CEND1,CETN3,CHAD,CHEK2,CHRDL1,CHRM3,CHST1,CHST12,CLD…
hsa-miR-211	AAMP,ABCB11,ABHD4,ABL2,ACOX3,ACP5,ADI1,AFM,AGAP3,AGPAT2,AKAP1,ALMS1,ANK1,ANKRD44,ARHGAP10,ARHGAP22,ARPC1B,ARRB2,ATF2,ATP13A4,ATXN7L3,AUP1,B4GALNT2,BPIFC,BTBD16,C10orf35,C11orf34,C11orf86,C15orf27,C17orf64,C19orf56,C1QL2,C1orf167,C2orf76,C3orf22,C5orf63,C6orf15,C7orf26,C9orf68,CA11,CAMK1,CATSPER2,CBLN1,CCDC107,CCDC8,CCL19,CCNT2,CCR10,CD40LG,CEACAM21,CELSR3,CHRND,CLDN15,COL5A1,COMMD3,COX5A,COX6B1,C…
hsa-miR-212	A4GALT,ACAD9,ACP2,ACTR5,ACVR2B,ADAL,AGPAT3,AHCY,ALKBH3,AMOT,ARHGAP22,ARHGAP32,ARX,ASB1,ASPHD2,ATN1,ATP13A2,ATP2C2,ATP6V0A4,ATP6V0D1,AVL9,AXIN2,B3GALNT2,B3GNT8,B9D2,BCAT1,BMS1,BNC2,BRAP,BRD2,BRI3,BUD13,C10orf112,C11orf52,C12orf26,C12orf48,C12orf63,C15orf38,C16orf74,C16orf87,C17orf72,C19orf47,C19orf51,C1orf88,C20orf54,C3orf62,C6orf132,C6orf136,C6orf165,C6orf94,C8orf47,C9orf156,C9orf4,CACNA1A,CALU,C…
hsa-miR-214	ACAA1,ACADVL,ACAT1,ACLY,ACTR5,ADAD2,ADAMTS19,ADAMTSL1,AHDC1,AHSA1,AHSG,AK8,AKR1B1,ALKBH6,ALPK2,AMT,ANAPC11,ANXA5,AP2A2,APLNR,APOBEC2,APOD,AQP8,ARF5,ARHGAP22,ARHGAP6,ARHGEF4,ARMC5,ARPC5L,ARVCF,ASTL,ATG7,ATP2A2,ATP6V1E1,ATPAF2,AVL9,B4GALNT3,B4GALT7,BCAP31,BIK,BIRC7,BSCL2,BTN1A1,C10orf125,C10orf99,C16orf53,C16orf57,C16orf70,C16orf71,C17orf90,C19orf56,C1QA,C1orf111,C2orf53,C7orf26,C7orf42,C7orf43,C7o…
hsa-miR-214_star	AARS2,ABHD11,AIFM3,ANKRD33,ARHGEF1,ARID5A,ATAD3B,BIN3,BMP10,C14orf80,C16orf71,C1QL2,C20orf112,C3orf27,CACNG8,CAMKK1,CARD11,CD52,CENPM,CLEC1B,CLUAP1,COMT,CSF2RB,CSNK1D,CYP2W1,DDX56,DNAJC7,EDARADD,F10,FAHD2A,FAHD2B,FAM151A,FAM166A,FAM187A,FAM83G,FBXO2,GAK,GPN2,GPR173,GPR39,HAUS7,HDC,IMPG1,ING1,INO80,IRAK1,ITGA7,KAT5,KCNC4,LHX4,LMX1B,LRFN4,LYPLA2,MAP2K2,MMP17,MRPL43,MRPS18A,MUC5B,MYBPC3,MYH14,MYH2,N…
hsa-miR-215	ABCC3,ABCG5,ACAT1,ACOT12,ADAMTS3,ADPRHL2,AKAP10,ALDH2,ALPK1,AMFR,ANGPTL4,ANKRD37,ANXA9,AP3M2,APBB1,ARHGAP29,ARL4C,ART3,ASB1,ASTL,ATG2A,ATG4A,ATIC,ATP1B1,ATXN7,B3GALNT1,BATF3,BCO2,BLZF1,BMPR1B,BRD3,BRIX1,C10orf90,C12orf40,C12orf63,C17orf47,C1D,C1orf111,C22orf23,C22orf32,C2orf28,C3orf14,C3orf19,C4orf26,C7orf66,C9orf93,CARS2,CASQ1,CBLN4,CCDC108,CCDC47,CCDC99,CCNE1,CCNT2,CDC7,CDCA4,CDH8,CFH,CHD2,CIB2…
hsa-miR-216a	AADAC,AAMP,ABCC2,ABHD12B,ACAD9,ACOT9,ACTB,ACTR10,AFF4,AFP,AGA,AGBL4,AIRE,AKD1,AKT1S1,ALPK1,AMN1,ANGPTL4,ANKS3,ANP32B,ANXA9,AP4B1,APRT,ARAF,ARMCX1,ASB1,ASCC1,ASPHD2,ATAD2,ATCAY,ATP1A3,ATPAF2,AVL9,BBS9,BEND7,BEX4,BIK,BMP10,BPIFB3,BPIFB6,BRI3,BST2,C10orf96,C12orf26,C17orf42,C19orf51,C20orf132,C20orf46,C20orf72,C22orf36,C2orf78,C3orf18,C4BPA,C6orf115,C7orf43,C8orf34,C9orf3,CACNA1G,CACNG6,CALHM3,CAMK2…
hsa-miR-216b	AARS,ACER1,ACER2,ACOT4,ADAMTSL5,ADRB2,AFF4,AGBL4,AHI1,AKIP1,AMN1,ANKRD22,ANKRD56,ANXA10,AP1M1,AP4B1,APIP,APOOL,AQP5,ARAF,ARAP3,ASB2,ASPHD2,ATP6V1G3,BAZ1A,BCCIP,BCL6B,BDH1,BEX5,BMPR1B,BMS1,BPI,BRF2,BRIP1,BTBD11,C10orf32,C10orf57,C10orf67,C13orf27,C14orf166,C16orf52,C16orf61,C16orf87,C1QTNF8,C1orf38,C20orf132,C6orf115,C6orf72,C7orf58,C7orf64,C9orf23,C9orf3,CACNG6,CAMK2G,CAPN9,CCBL1,CCDC22,CCDC23,CC…
hsa-miR-217	ACER2,ACOT12,ACTR10,ACTR5,ADAMTS2,ADAMTSL1,ALDH18A1,ALDH1L2,ALG10B,AMHR2,AMN1,ANKIB1,ANLN,ANP32E,AP3D1,AP3S1,APPL2,AQP5,ARHGAP12,ARHGEF17,ASTN1,ATAD2,ATG2A,ATP6V0D1,ATP9A,ATPBD4,B3GALT2,BAAT,BAG3,BAI3,BRP44L,C10orf11,C10orf28,C12orf24,C14orf37,C16orf53,C19orf2,C19orf43,C1orf64,C20orf54,C6orf163,C8orf38,CABP4,CALHM2,CARD11,CBR1,CCDC102A,CCKAR,CCT6B,CD163,CD44,CDC5L,CDH1,CENPV,CERS6,CHN2,CHPF,CHST7…
hsa-miR-218-1_star	ACAD9,ACPL2,ACSL5,ADRA1A,AGT,AGTRAP,AHI1,ALG6,ANKRD46,ARL10,ASF1B,ATAD3B,ATP13A1,ATP1A4,ATPAF1-AS1,BCAM,BEST2,BRD4,BRF2,C15orf55,C1orf129,C1orf159,C21orf58,C7orf42,C8orf47,CALCA,CALCB,CAPN9,CD164L2,CD79B,CD8B,CDC27,CDK20,CES4A,CHAMP1,CHCHD6,CHD1L,CHRD,CHRND,CUEDC1,DCAKD,DLL4,DOCK7,DOK1,DUSP23,ECHDC2,EFEMP2,EIF4A1,EIF4ENIF1,EMCN,EPO,ERAL1,EVC2,F2,FAM102A,FAM154A,FAM169B,FAM184A,FAM187B,FAM3D,FAM55…
hsa-miR-218-2_star	ABCB1,ABCC10,ACAD9,ADAMTS15,AGT,AGTRAP,AKD1,ALG6,ALS2CR11,AMPD2,ANKHD1,ANKRD46,ANKRD7,APOB,ARL10,ARMCX2,ASF1B,ATAD3B,ATP13A1,ATP1A4,ATP5L,ATP6V0D1,BATF3,BCAM,BEST1,BRD4,BST2,C10orf2,C10orf96,C12orf42,C12orf70,C14orf177,C14orf180,C15orf55,C16orf61,C17orf81,C1orf129,C1orf167,C21orf58,C2orf50,C7orf26,C7orf42,C8orf47,C9orf46,C9orf80,CALCA,CALCB,CAPN9,CCDC23,CCDC65,CCDC99,CCL2,CD164L2,CD79B,CD8B,CDC27…
hsa-miR-218	AASS,ABCC6,ABCD2,ABCF2,ACOT13,ACSL1,ACTN1,ACYP2,ADAM21,ADARB2,AKIRIN1,ALAS2,ALDOB,ALOX15B,ANK1,ANKRD1,ANKRD30BL,AP2A1,APBA1,APBB1IP,APH1B,ARAF,ARG1,ARID4B,ARMC7,ASB4,ASS1,ATAD2,ATL1,ATP1B1,ATXN7L3,BAI3,BATF3,BBS9,BRCC3,BZW2,C11orf54,C12orf48,C17orf70,C20orf132,C20orf151,C22orf36,C4BPA,C6orf201,C6orf99,C7orf25,C7orf59,C9orf46,C9orf68,CA2,CACNB4,CARD17,CBLL1,CCDC101,CCDC132,CCDC22,CCDC24,CCDC89,CCN…
hsa-miR-219-1-3p	AADAC,ABHD12,ABHD8,ACAA1,ACAT2,ACCN4,ACOT13,ACOX3,ACY3,ADAT3,AHSG,AKNAD1,ALMS1,ALOX5AP,ANKRD55,ASCC2,ASNS,ASPA,ATAT1,ATP12A,ATP13A4,ATP5D,ATP6V0D1,ATPAF2,AVPR2,B3GALNT2,BBOX1,BMP2K,BTG3,C10orf11,C10orf53,C10orf71,C11orf41,C11orf48,C16orf42,C18orf21,C18orf34,C19orf28,C1orf159,C1orf162,C1orf177,C1orf85,C3orf15,C6orf118,C6orf201,C7,C8orf45,CAMSAP3,CCDC60,CCDC65,CCDC86,CCL23,CCL8,CCR7,CD48,CD9,CDC40,…
hsa-miR-219-2-3p	AADAC,ABCA1,ABHD5,ACSS2,ACTR10,ACTR3B,AHR,AHRR,ALG12,ALOX5AP,ALPK2,AMPD1,ANKRD30A,AP4S1,AQR,ARHGEF10,ASB10,ASB3,ASPA,ASXL2,ATAD2,ATAT1,ATP6V1G3,ATXN10,B4GALT3,BAI3,BAIAP2L2,BCAT2,BCL10,BFAR,BLZF1,BOC,BPHL,BPY2B,BPY2C,BRD8,C12orf11,C13orf30,C15orf33,C16orf45,C16orf52,C18orf56,C1orf110,C1orf177,C3orf32,C4BPA,C5orf35,C6orf118,C6orf146,C6orf201,C8B,C8orf34,CA2,CATSPERB,CCDC138,CCDC152,CCDC28A,CCDC33,…
hsa-miR-219-5p	ABCG4,ABHD14A,ABHD8,ACAD10,ACAT2,ACOT9,ACOX1,ACOX3,ACOXL,ADAM22,ADAMTS6,ADCY10,ADSS,AEN,AGPAT4,AGXT2L1,AKAP10,AKNAD1,ALS2CR8,AMOT,ANKMY1,AP1B1,AP4S1,AQP11,ARHGEF4,ARID3B,ARPC2,ARPC5L,ART1,ASH1L,ASL,ASPHD1,ASS1,ASXL2,ATAD2,ATL3,ATP13A4,ATP1A3,ATP4A,ATP6AP1L,ATP6V1G1,AWAT2,B3GALNT2,BAIAP2L2,BARX1,BPY2B,BRD8,BTN1A1,BUB1,C10orf120,C10orf128,C10orf96,C12orf50,C13orf26,C14orf105,C15orf58,C16orf59,C16or…
hsa-miR-21_star	AAMP,ABTB1,ACAA1,ACADS,ACBD5,ALPK2,AP1B1,AP2A1,ARPC5L,ATF2,ATG10,ATP1B1,ATP6V0B,ATP6V1E1,BANP,BEND5,C12orf68,C17orf79,C2orf28,C2orf44,C6orf130,CARTPT,CBY1,CCDC158,CCL17,CNKSR3,CRLS1,CRYZL1,DAXX,DCBLD1,DCTN2,DDB1,DEFA4,DMD,DNMT1,DTNB,DYM,EML2,EPHX4,FAM190A,FBXO15,FBXO7,GABRG3,GAK,GPR37L1,GRHPR,GRIK1,GUCA1A,HAUS5,HBP1,HDAC8,HNF4G,HNMT,HOXD11,IGFBP6,IL22,ITIH5,KCNG4,KIAA0391,KIF13A,KRTAP1-3,LARP1B,L…
hsa-miR-22	A2LD1,ABCC10,ABCC11,ACTR10,ACTR6,ADAM10,ADCK2,ADCY6,ADRA1A,AGBL5,AHDC1,AMBP,AMFR,ANKHD1,ANKS3,AP1B1,AP1M2,AP2A1,APBB2,ARHGAP4,ARID5A,ART1,ART5,ASS1,ATOH1,ATP9A,B2M,B3GNTL1,BATF3,BBS4,BCL11A,BCL7B,BCL9L,BIN1,BRD4,BRP44,BRPF3,BSPRY,C10orf125,C13orf30,C15orf27,C17orf53,C19orf26,C19orf70,C19orf77,C1orf114,C1orf122,C1orf228,C1orf49,C20orf111,C2orf50,C5orf38,C6orf154,C6orf201,C7,C8orf55,C9orf117,CA7,CA…
hsa-miR-220	AAMP,ABCA1,ABCC10,ABHD11,ABHD16B,ACAD10,ACO2,ACSF3,ACVRL1,ADAD2,ADAMTS6,AFF4,AFG3L2,AFP,ALDH1L1,ANKHD1,ANKMY1,ANKRD44,AOAH,AOC2,APOBEC2,APTX,ARGLU1,ARHGAP35,ARHGAP44,ARHGEF25,ARMC5,ARPC5L,ART5,ARVCF,ASB2,ATG4D,ATN1,ATP13A3,ATP2A3,AVPR2,AZGP1,B3GALNT2,BAIAP3,BCAP31,BCAR1,BCR,BEND5,BMP10,BNC2,BRD4,BRI3,BRK1,BST2,BZW2,C10orf53,C10orf68,C12orf45,C15orf24,C16orf7,C17orf62,C19orf28,C1orf222,C20orf173,C…
hsa-miR-220b	AAAS,AARSD1,ABCA1,ABCA7,ABCC12,ABCG4,ABHD11,ACAA1,ACADS,ACER1,ADAM33,ADAMTSL4,ADAMTSL5,AHNAK,AIRE,AJAP1,AKAP5,ALKBH5,ALMS1,AMZ1,ANKS4B,ANXA6,AOC2,APOL3,ARHGAP9,ARHGEF25,ARSI,ART1,ASB1,ASB2,ASCC1,ATG9B,ATOH1,AZGP1,B3GAT1,B3GNT7,B3GNT8,B4GALT4,BCAS2,BCL2L10,BCL2L12,BEND5,BNIP1,BPNT1,BRCA1,BRD4,BRMS1L,C10orf11,C10orf35,C11orf2,C12orf10,C14orf119,C17orf72,C17orf82,C19orf28,C19orf47,C1orf135,C1orf150,…
hsa-miR-220c	ABHD16A,ACP5,ACTA1,ACTA2,ADA,ADAM33,ADAMTS6,ADAMTSL1,ADAMTSL4,ADI1,ADRA1B,AFG3L2,AIFM1,AIP,AIRE,AK2,AKAP5,AKR1B1,AKR1C3,ALDOC,ALKBH6,ALMS1,AP2M1,AP3S1,APOL3,AQP1,ARFRP1,ARHGAP22,ARHGAP4,ARSI,ARVCF,ASB2,ASH2L,ATN1,ATP2A1,ATP6V0D1,B3GAT3,B9D1,BABAM1,BATF3,BBS4,BEND5,BHLHE23,BIK,BMP1,BNC1,BNC2,BRCA1,C10orf68,C10orf81,C12orf52,C16orf42,C17orf81,C17orf82,C17orf90,C19orf10,C19orf48,C19orf51,C19orf80,C1…
hsa-miR-221	AADAC,ABCC11,ACTR10,ADAP1,ADSL,ALDH1A1,ALKBH3,ALKBH8,ANGPT4,ANGPTL2,ANGPTL4,ANKRD10,ANKRD55,ANXA1,ANXA3,AP3B2,APEH,APOOL,ARF4,ARHGEF17,ARIH2,ATF2,ATN1,ATP13A2,ATP1A1,ATP5SL,ATPAF2,ATPBD4,AUTS2,AZGP1,B3GAT3,B3GNTL1,BCAT1,BEND2,BLVRA,BRAP,BRI3,BRIX1,BRK1,BRP44,BTG3,C10orf82,C15orf26,C16orf45,C17orf75,C18orf32,C19orf59,C19orf80,C1orf65,C1orf87,C20orf72,C4orf33,C5orf50,C6orf58,C7orf51,C8orf42,C9orf13…
hsa-miR-221_star	ADAM20,ADORA2B,ALDH3B2,ANKIB1,ANKRD53,AP1S1,AQP8,ATE1,ATXN7L3,C1orf134,C7orf51,C9orf71,CADPS2,CECR2,CFH,CLVS2,COIL,DAD1,DDX17,DYSF,ENTPD1,FBXW2,FOXP3,FRMD3,GLIS1,GUCY1A2,IQCH,KRT35,LEPREL2,MARCH10,MED22,MTSS1L,MXD3,NPDC1,NUB1,OR5AR1,PAMR1,PBXIP1,PCIF1,PCSK9,PDLIM2,PDLIM7,PGAM2,PLK5,POU5F1,PRSS54,PTGER3,RAP1GAP,REC8,RNF133,RNF222,RWDD3,RXFP4,SCO1,SDCCAG8,SEMA7A,SLC2A11,SLC9A5,SLN,SP2,SPATA4,SVEP1,…
hsa-miR-222	A4GNT,AADAC,ABTB2,ACTR5,ADAP1,ADHFE1,ADSL,AGPAT4,ALDH1A1,ALKBH3,ANKRD10,ANO10,ANXA1,ANXA3,AP3B2,AP3D1,APTX,ARIH2,ATF2,ATN1,ATP13A2,ATP1A1,ATPAF2,AVPR2,B3GALT5,B3GAT3,BBS12,BCL2L14,BRAP,BRI3,BRK1,C10orf112,C11orf83,C12orf24,C15orf26,C18orf32,C18orf56,C19orf2,C19orf45,C1QTNF9B,C1orf100,C1orf65,C1orf87,C4orf33,C5orf46,C6,C7orf51,C8orf42,C9orf135,C9orf169,CALHM3,CAPRIN2,CAST,CBY1,CCDC129,CCDC18,CCDC3…
hsa-miR-222_star	ANKRD53,ARHGAP6,ARL2,ATG7,BCL2L11,C16orf53,C1QA,C6orf103,C9orf129,CD163,CDK7,CHRM3,COL25A1,CSNK2B,CSTA,CYB5R2,CYHR1,DBI,DDIT3,DEPDC1B,DHX57,DPAGT1,EML3,FAM83A,FGD3,FGF20,GIP,GPSM3,HHIPL2,JMJD7-PLA2G4B,KIF4A,KRTAP13-4,MAMSTR,MIR7-3HG,MLIP,MMS19,MRPL16,MRPL43,NEDD8,NEU3,NME3,NRF1,OR5A1,PCDHB2,PCMTD1,PGM3,PHPT1,PLEKHG1,PPP1CB,PSD,RABEP1,RASEF,RIMS3,SETD2,SHOX,SLC25A10,SLC35D2,SMOX,SMPDL3A,SORCS1,SPR…
hsa-miR-223	ACCN3,ACCS,ACOX1,ACTA1,ACTR5,ACVR2A,ADAMTS2,ADCYAP1,AHRR,AIMP2,AKR7A2,ALS2CR8,AMIGO2,AMY1B,ANK1,ANKRD44,APOOL,AQP8,AQR,ARHGEF38,ARID1A,ARMCX1,ARMCX2,ARPC5L,ARSJ,ASCL4,ATF1,ATOX1,ATP1B1,ATP5E,ATP5EP2,ATP6V0A4,B4GALT4,BAAT,BRAF,BRPF3,C12orf50,C15orf26,C17orf58,C1orf49,C20orf118,C20orf134,C20orf160,C20orf46,C22orf28,C2orf76,C5orf34,C8orf48,C9orf79,C9orf96,CA5A,CACNB4,CAPN7,CBLB,CBLL1,CCDC74A,CCDC74B…
hsa-miR-223_star	ABCA6,ACN9,ADAMTS6,AGXT2L2,AMICA1,ARMC4,B3GALNT2,BUB3,C13orf27,C18orf21,C1orf74,C6orf118,CARD14,CCL4,CCT3,CEP290,CHAC2,CTSL1,DLEU7,DLK2,DNAJB11,EFHC1,EIF1B,EIF2D,EIF4G3,FAM108B1,FAM127A,FAM208B,FBN1,FCER1A,FRMD3,GTF3C3,HS3ST3A1,HTATSF1,IFNA21,ISCU,ITM2A,KIAA0564,KRBOX1,KRT40,LEO1,LIPI,LUM,MAP9,MMADHC,MORF4L1,MRPS30,NOL8,NRBF2,NSA2,NT5DC4,NUP37,OR6B3,PAK1IP1,PDCL,PDSS1,PEX3,PIGV,PPM1D,PPWD1,PRAMEF…
hsa-miR-224	A4GALT,AANAT,AATF,ACAT1,ACER3,ACOT12,ACSF2,AFG3L2,AHSG,AK7,ALLC,ALS2CR8,AMACR,ANKHD1,ANKRD49,AP2M1,AP3B2,AP3M1,APOL2,ARHGAP21,ARHGAP9,ARHGEF40,ARPC3,ASCC1,ASS1,ATF2,ATG2B,ATP2C2,ATPAF2,BARX1,BEST3,BNIPL,BRCA1,BTG4,BUD31,BYSL,C10orf81,C12orf11,C12orf43,C12orf57,C14orf49,C17orf75,C17orf80,C18orf34,C20orf26,C5orf25,C5orf32,C6,C7orf60,C9orf11,C9orf80,CA2,CACNG1,CAMK2B,CAMKMT,CASP9,CAST,CAT,CCDC132,CC…
hsa-miR-22_star	AADACL2,ABHD12,ABHD5,ACCS,ACSBG2,AHI1,AIFM3,AIM2,AMIGO2,ANKRD46,APOB,ASCL4,ATP6V1B1,BCAR1,BCCIP,BEST1,BIN1,BPIFA2,BUB1B,C11orf52,C12orf28,C15orf26,C17orf72,C17orf75,C6orf201,C9orf23,C9orf68,CA3,CARTPT,CASC1,CCDC132,CCDC42,CCDC59,CD79B,CD99,CIDEC,CLIP1,CNPPD1,CNTNAP3,CNTNAP3B,CNTRL,CREB3L4,CRISP2,CTRC,CXorf40B,DHRS2,DNAH14,DNAH8,DOCK6,EBF1,ECHS1,EIF2B5,ESYT2,ETNK2,EXO1,F11,FABP9,FAM115A,FAM123A,FA…
hsa-miR-23a	ABCC5,ABT1,ACRC,ACTR5,ADCK1,AFF4,AKAP5,ALDH1A1,ALDH9A1,ALG13,ANKHD1,APBA1,APBB1IP,ARG1,ARHGAP9,ARPC1B,ARSA,ART5,ASB15,ASTN2,ASZ1,ATG12,ATP6V1E1,ATP6V1G3,ATXN7L3,AUH,AZGP1,B3GNT1,BBS9,BCAM,BMP10,BRAP,C10orf68,C12orf62,C14orf135,C15orf42,C15orf44,C16orf95,C17orf72,C17orf81,C18orf21,C18orf56,C1orf110,C1orf168,C1orf65,C20orf111,C20orf85,C2orf89,C3orf38,C6orf115,C6orf146,C6orf154,C8orf58,CA5A,CA9,CACN…
hsa-miR-23a_star	ABCG8,ACCSL,ADAM33,ALKBH6,ALPL,ANGPTL6,ANO9,APBA3,APLP1,ART1,ASGR1,ATP13A1,ATP13A2,BAI2,BCKDK,BEGAIN,BIN3,BPI,BRMS1,BTD,BTK,C12orf52,C19orf25,C20orf134,C21orf2,C21orf58,C2orf53,C2orf57,C4A,C9orf71,CA7,CCDC24,CCDC56,CCDC9,CCL19,CCL21,CD101,CD164L2,CD320,CD37,CD81,CDH23,CDH24,CELA3A,CHD4,CHRNA1,CKM,CLSTN1,CNTN1,COX6B1,CPNE5,CREB3L3,CSMD2,CTDP1,CTSA,CUEDC2,CXCR3,DPEP1,DTYMK,DYNLRB1,EML2,ENSA,ERBB2,E…
hsa-miR-23b	AACS,ABT1,ACRC,ACTR5,ADCK1,AFF4,AHCYL1,AKAP5,ALDH1A1,ALDH9A1,ALG13,ANKHD1,APBA1,APBB1IP,ARFIP1,ARG1,ARHGAP9,ARPC1B,ARSA,ART5,ASB15,ASZ1,ATG4C,ATP6V1E1,ATP6V1G3,ATXN7L3,AUH,AZGP1,B3GNT1,BBS9,BCAM,BLOC1S2,BMP10,BRAP,C10orf68,C12orf62,C14orf135,C15orf42,C16orf95,C17orf72,C17orf81,C18orf21,C18orf56,C1orf110,C1orf168,C1orf65,C1orf74,C20orf111,C20orf85,C2orf89,C6orf115,C6orf146,C6orf154,C8orf58,C9orf86…
hsa-miR-23b_star	ADAM33,AEBP1,AHRR,ALKBH6,ANAPC11,ANGPTL6,APBA3,ARAP1,ATP13A1,ATP6V1B1,BCAM,BCKDK,BTD,BTK,C19orf25,C1orf127,C20orf112,C20orf134,C21orf2,C2orf53,C2orf57,C4A,C7,C7orf53,C9orf71,CA7,CCDC107,CCDC9,CCL19,CCL21,CD164L2,CD300LG,CD320,CD37,CDH24,CELA3A,CHD3,CHD4,CHRNA1,CKM,CNTN1,CREB3L3,CSNK2B,CTDP1,CTSA,CUEDC2,CXCR3,DBP,DPEP1,DTD1,DTYMK,DYNLRB1,ECM1,EFEMP2,EGFL7,EIF2B2,EML2,ENPP7,ENSA,EPHX1,ERBB2,EWSR1,F…
hsa-miR-24-1_star	AATF,ABHD16B,ADAM2,ALOX5,ANKRD26,APOB,ATG10,BDKRB1,BUD13,C11orf88,C16orf71,C16orf79,C17orf47,C1orf101,C1orf114,C1orf135,C20orf26,C5orf44,C9orf3,C9orf50,CABP4,CACNA2D3,CBX6,CCDC146,CCL3,CCL3L3,CEP152,CHAMP1,CHI3L1,CLIC1,CPT1B,CRCP,CYP4B1,DAZ2,DBNDD2,DEPDC5,DHH,DNM2,DRG2,ELOVL5,ENG,EPG5,ESX1,EVPL,EXOC4,EXT2,F7,FAM187A,FANCG,FARSA,FBXO2,FOXA3,FOXO3,FOXP2,GALNTL4,GALR1,GPR172A,GSG1,HCFC1R1,HCRTR1,HIS…
hsa-miR-24-2_star	A4GNT,AATF,ABHD16B,ADAM2,ADORA2B,ADRA1A,ALOX5,ANKRD26,APOB,ARHGAP19,ASPA,B3GNTL1,BUD13,C16orf71,C16orf79,C17orf47,C17orf50,C1orf101,C1orf114,C20orf26,C2orf43,C5orf44,C9orf3,CACNA2D3,CBX6,CCL3,CCL3L3,CEP152,CFD,CLIC1,CLNS1A,CPT1B,CRCP,CYP4B1,DAZ2,DBNDD2,DDX10,DGKG,DHH,DHX35,DNM2,DRG2,EGFL7,ELOVL5,ENG,EPG5,EVPL,EXT1,FABP3,FANCG,FARSA,FBXO2,FNDC9,FOXA3,FOXO3,FREM1,FRMD3,GALNT11,GALNTL4,GALR1,GNG2,GP…
hsa-miR-24	AARS,ABCA2,ABCB9,ABCC3,ABCD4,ABCF3,ABI3,ACAD9,ACE,ACHE,ACSF2,ADCK2,ADCK5,AHI1,ALAS2,ALPI,AMICA1,ANKMY1,ANKRD13D,ANO9,APOBR,APPL2,AQP7,ARAF,ARFGAP2,ARHGEF16,ARID5A,ARMC6,ASB1,ASF1B,ATP13A1,ATP13A2,ATP5D,ATPAF2,B3GAT3,B3GNT8,B4GALNT3,BCAP31,BCL2L12,BIRC7,BNIP1,BPIFB2,BVES,C10orf82,C14orf80,C16orf53,C17orf57,C19orf57,C19orf6,C20orf96,C2orf72,C3orf33,C4orf48,C6orf103,C6orf130,C6orf47,C7orf26,C8B,C9or…
hsa-miR-25	AARS,AATK,ABHD3,ACAA1,ACAA2,ACACB,ACADL,ACOT13,ACOT6,ACOX1,ACTC1,ADAD1,ADM,AFMID,AKR1E2,ALDH9A1,AMPD1,ANKRD16,ANKRD24,ANUBL1,AOAH,AP1AR,APRT,ARFIP2,ARHGEF10,ARHGEF17,ARMC2,ASB16,ASH2L,ASRGL1,AURKA,BCAR1,BCAT2,BCL6,BOLA1,BPNT1,BST2,BYSL,C10orf111,C10orf137,C10orf90,C12orf34,C16orf53,C19orf12,C1orf174,C1orf87,C2CD3,C3,C3orf25,C3orf33,C6orf27,C7orf25,C9orf30,CA1,CABP2,CABYR,CACNB4,CAMLG,CASS4,CCDC89…
hsa-miR-25_star	ACHE,ACRV1,ADAMTS10,AKR1E2,ALDH3A1,ALOX5AP,ANKS1B,ANXA6,APBA3,ARPC1A,ASPSCR1,ATCAY,BAI1,BATF3,BPIFB3,C11orf20,C3orf25,C9orf84,CALHM3,CALY,CBY3,CD37,CD99,CDC37,CENPM,COG7,COX4I2,CROCC,CYP17A1,CYP27A1,DAD1,DDAH2,DLL3,DNAJC2,EMILIN1,EXOC3,EXOC3L1,FAM125A,FAM178B,FIBP,FKBP8,FRS3,GAL3ST2,GPHA2,HCLS1,HCRT,HCRTR1,HPD,HTR3E,HTRA3,IGHMBP2,IL16,IRX1,KATNB1,KCNJ4,KLK10,KLK9,LAD1,LBX1,LIMS2,LRFN2,LRP1,LTBP3,…
hsa-miR-26a-1_star	ACAA2,ACAD9,ADK,AIM2,ALPK1,ANKAR,ANKRD33,AOX1,AP4S1,APH1A,APOBEC3B,ARHGAP22,ARPC3,ASPA,ATAT1,ATP13A4,ATP6AP2,ATP6V0E2,BTBD8,C14orf159,C15orf55,C1orf98,C20orf151,C20orf196,C6orf201,C8orf34,C9orf25,C9orf5,CABLES1,CAPN1,CBY1,CCDC63,CCDC78,CDH20,CENPE,CEP120,CETN1,CHIC1,CHST11,CIB3,CLK1,CLTA,CRTC3,CYP26C1,CYP2A13,CYP2A6,CYP2A7,CYP4B1,DCHS2,DDAH2,DEC1,DMRT3,DTWD1,EIF4EBP3,ELAC2,ENKUR,EZH2,FAM3D,FAM71F…
hsa-miR-26a-2_star	A2M,ACAA2,ACAD9,ADH4,ADK,AHI1,AIM2,ALDOC,ALG12,ALPK1,ANKAR,ANXA10,AOX1,AP4B1,AP4S1,APH1A,APOBEC3B,ARHGAP22,ARNT2,ARPC3,ATAT1,ATP13A4,ATP13A5,ATP6AP2,BCL2L14,BMP2K,BTBD8,C10orf128,C14orf159,C1orf98,C20orf196,C8orf34,C9orf25,C9orf40,CAPN1,CBY1,CCDC152,CCDC78,CD109,CENPE,CETN1,CHIC1,CLK1,CLTA,CRTAC1,CRTC3,CSNK2B,CYP2A13,CYP2A6,CYP2A7,CYP4B1,DCHS2,DEC1,DEF6,DMRT3,DPYD,DTWD1,DUS4L,DUSP13,DYNLL1,EIF4EB…
hsa-miR-26a	AASDH,ABCB9,ABCC2,ABCC9,ADH5,ADM,ADNP2,ADPRHL2,AHI1,AICDA,ANGPTL2,ANKRD44,APTX,ARAF,ARHGAP33,ARPC2,ARPC3,ART3,ASB4,ASCC3,ASPN,ATP13A3,ATP5C1,ATP6AP1L,ATP6V0A4,ATP6V1H,AZGP1,B3GNT5,BANK1,BCAR3,BCCIP,BCL7B,BCOR,BCS1L,C10orf28,C12orf35,C14orf37,C16orf61,C1S,C1orf94,C20orf24,C4orf21,C6orf118,C8orf42,C8orf48,C8orf76,C9orf156,CACNG6,CAMSAP1,CC2D2A,CCDC147,CCL13,CCNA2,CCRL1,CCT2,CD36,CDA,CDC34,CDC6,CDK2…
hsa-miR-26b	AASDH,ABCB9,ABCC2,ABCC9,ACSS3,ADM,AHI1,AICDA,ALS2CR12,AMTN,ANGPTL2,ANKRD44,APTX,ARPC2,ARPC3,ART3,ASCC3,ASPN,ATAD5,ATP13A3,ATP5C1,ATP6AP1L,ATP6V0A4,ATP6V1H,AZGP1,BANK1,BCCIP,BCL7B,BCOR,BID,C12orf35,C14orf37,C15orf24,C16orf61,C16orf70,C17orf63,C1S,C1orf94,C20orf24,C4orf21,C6orf115,C6orf118,C6orf146,C8orf48,C8orf76,C9orf156,C9orf78,CACNA1G,CCDC147,CCDC60,CCL13,CCL26,CCNA2,CCRL1,CCT2,CDC34,CDC6,CDK2A…
hsa-miR-26b_star	AANAT,ABHD12,ACAA2,ADAMTSL1,ADH4,ADK,AGPAT3,AHCY,ALDOC,AMIGO2,ANKRD33,ANKS3,APOA1BP,ARHGAP22,ARNT2,ASB2,ATAT1,ATP6AP2,ATP8B2,AVPR2,BAZ2B,BCL9,BCS1L,BPIFA2,BTBD8,BTNL9,C10orf137,C10orf53,C12orf10,C14orf159,C16orf89,C16orf95,C17orf109,C1orf87,C5orf46,C7orf59,C8orf34,CABLES1,CBX2,CCDC78,CD99,CDH4,CDKL4,CDS2,CENPE,CEP120,CHIC1,CHST11,CIB3,COG7,CYP2A13,CYP2A6,CYP4B1,DCTN2,DEF6,DERL3,DLEC1,DUS4L,DUSP13…
hsa-miR-27a	A3GALT2P,ABCA3,ABCG5,ACAT1,ACCS,ACO2,ACTA2,ACTR5,ACTR6,ADAMTS10,ADAMTS6,ADCK5,ADORA2B,ADRA1A,ADRB2,AEN,AFAP1L2,AFG3L1P,AFG3L2,AGMAT,AHSG,AKR7A2,ALDH1L2,ALDH4A1,ALKBH2,ALKBH3,ALKBH6,ANGPTL6,APLNR,APOOL,AQP11,AQP5,ARFGAP2,ARHGAP21,ARHGEF38,ARID3C,ARL14,ARMC6,ASPHD2,ASS1,ATG2A,ATOH7,ATP5G3,AURKAIP1,B3GNTL1,B4GALT3,BABAM1,BAG2,BATF,BCAS4,BCL2A1,BCL3,BEX2,BNIP3,BPIFA2,BPIFB6,BRAP,BRSK1,BTD,C10orf107,C…
hsa-miR-27a_star	AARS,ACAN,ACE,ACER2,ACP5,ACTA1,ADH7,AGBL5,ALPK1,ALS2CR12,ANGPTL6,ANO7,ANXA1,AP1M2,APEX1,APOBEC3H,APOBR,ARG1,ARHGAP29,ASH2L,ASPA,ATF3,ATG2A,ATPAF2,BEST2,BTF3,BUB3,BYSL,C10orf125,C10orf95,C14orf180,C15orf27,C17orf82,C19orf10,C19orf51,C20orf166,C20orf173,C20orf46,C8B,C9orf84,C9orf86,CARS,CCDC115,CCDC24,CCDC33,CCDC71,CCNO,CD6,CD99,CDK5,CDY1,CEACAM3,CELA3A,CEP41,CGREF1,CLIP3,COL6A2,COL9A3,CPN2,CSF3R,C…
hsa-miR-27b	A3GALT2P,ABCA3,ACAT1,ACCS,ACER1,ACO2,ACSM3,ACTA2,ACTR5,ACTR6,ADAMTS10,ADAMTS6,ADCK5,ADORA2B,ADRA1A,ADRB2,AEN,AFAP1L2,AFG3L1P,AFG3L2,AGMAT,AHSG,AKR7A2,ALDH4A1,ALKBH2,ALKBH3,ALKBH6,ANGPTL6,APCDD1,APLNR,APOOL,AQP11,AQP5,ARHGAP21,ARHGEF38,ARID3C,ARL14,ARMC6,ASH2L,ASPHD2,ASS1,ATG2A,ATOH7,ATP5G3,ATXN10,AURKAIP1,B3GNTL1,B4GALT3,BABAM1,BAG2,BATF,BCAS4,BCL2A1,BCL3,BEX2,BNIP3,BPIFA2,BRAP,BRSK1,BTD,C10orf10…
hsa-miR-27b_star	AADAC,AARS,ACER2,ACP5,ACTA1,ADAM21,AGBL3,AHSG,ALDH8A1,ALS2CR12,ANGPTL6,ANKRD37,ANO7,ANXA1,APOBEC3H,ARG1,ARSI,ASPA,ATG2A,BUB3,C12orf63,C13orf27,C16orf62,C17orf82,C19orf10,C1orf220,C1orf49,C20orf173,C20orf46,C21orf2,C22orf40,C2orf28,C4orf19,C6orf58,C7orf43,C9orf43,C9orf84,CBLL1,CCDC110,CCDC24,CCK,CD151,CD160,CEL,CELA3A,CENPN,CHRNA1,CLEC4G,CLTA,COL6A2,CPN2,CPO,CRH,CSF3R,CSPG5,CTDSPL,CTNNA3,CTSL1,CUE…
hsa-miR-28-3p	AADAC,ACRV1,ADA,ADAL,ADORA2B,AGA,AGT,AIG1,ALPK1,ANGPTL3,ANKRD1,ANKRD42,ANKRD55,ANKRD56,AP4B1,APOA4,APOL4,ARIH1,ARMC2,ARMCX3,ASB11,ASGR1,ATP2A2,ATP2C2,ATXN10,B3GALT5,BHLHB9,BNIP1,BNIP3,BOLA3,BPIFA4P,BRIP1,BRP44,BTF3,C10orf112,C14orf38,C15orf48,C19orf40,C1orf124,C1orf192,C20orf26,C2orf29,C2orf76,C6orf72,C7orf53,CALHM2,CAPN7,CAPZA3,CARD9,CAST,CC2D2B,CCDC108,CCDC129,CCDC24,CCL20,CCNA1,CCNE2,CCNO,CCR1…
hsa-miR-28-5p	AANAT,AARS2,ACOT9,ACRV1,ACSF2,AHNAK,AIG1,ALPK1,ANKHD1,ANKRD30BL,ANXA9,APOA1BP,APOC3,AQP5,AQP6,ARAF,ARIH1,ASPA,ASPG,ATP5D,ATPAF1,B4GALNT3,BCAP31,BCDIN3D,BEST3,BIVM,BMP2K,BNIP1,BPI,BRCA1,BTF3,C10orf125,C10orf62,C10orf71,C12orf44,C14orf1,C14orf166,C17orf70,C17orf75,C18orf21,C1orf162,C1orf186,C1orf35,C1orf86,C2orf53,C4orf47,C9orf129,C9orf169,C9orf171,C9orf3,CACNA1G,CALHM2,CAMK2D,CASZ1,CC2D2B,CCDC12,C…
hsa-miR-296-3p	AARS,AATF,ABCF3,ACADS,ADA,ADAMTS10,ADAMTS4,AGER,AGXT,AHSA1,ALDH16A1,ALKBH4,ALPI,ANGPT4,ANK1,ANKS1B,ANO9,AOAH,AP2A2,AP3B2,APBB3,APOBEC3B,APOC2,AQP5,ARAF,ARAP1,ARHGAP4,ARHGEF1,ARHGEF11,ARHGEF25,ARID3A,ASPSCR1,ATAT1,ATP2A1,ATP6V0B,ATP6V0D1,ATP7B,AUP1,BAI1,BARHL1,BCS1L,BGLAP,BIRC7,BLOC1S1,BMP8A,BPIFA3,BPIFB4,BRP44L,C10orf125,C10orf82,C11orf31,C11orf84,C12orf52,C16orf92,C17orf72,C17orf96,C18orf10,C19o…
hsa-miR-296-5p	AAMP,ABI3,ABTB1,ACBD4,ACO2,ACTN1,ADAM15,ADAMTS4,ADAMTSL2,ADAP1,ADCK2,ADCK5,ADRBK1,AGER,AGFG2,AHDC1,AHSA1,AHSG,AIM1L,AKT1S1,AMDHD2,ANGPT4,AP1G2,AP1M1,AP2A2,APOBEC3B,APOC1,ARAF,ARAP1,ARHGAP33,ARHGAP4,ARHGEF1,ARHGEF25,ARID5A,ASNA1,ASPDH,ASPSCR1,ASS1,ATP1A4,ATP2C2,ATP4A,ATP4B,ATP9A,AVPR2,B4GALNT3,BAI2,BAIAP2L2,BARHL1,BARX1,BBC3,BCL3,BCS1L,BGLAP,BHLHE23,BIN1,BIRC7,BMP8A,C10orf125,C10orf27,C10orf93,C16…
hsa-miR-297	ABCA9,ABCC2,ABHD14B,ABHD3,ACBD5,ACTA1,ACYP2,ADAM23,ADAM9,ADAMTSL4,ADK,AGPAT3,AHRR,AHSA1,AHSG,ALCAM,ALG12,AMHR2,AMPD1,AMPH,ANKHD1,ANKRD29,ARG1,ARRDC3,ATF1,ATL2,ATP9A,BAZ2B,BCL3,BEAN1,BMPR1A,BRE,BST1,C10orf28,C10orf93,C11orf82,C11orf91,C13orf27,C14orf149,C14orf37,C17orf46,C19orf59,C1orf146,C1orf174,C1orf31,C20orf94,C22orf25,C2orf73,C2orf78,C2orf82,C3orf30,C4orf40,C4orf41,C6orf118,C7orf72,C9orf95,CC…
hsa-miR-298	ACAA2,ACSS2,ACTR5,ACVRL1,ACYP1,ADAM19,ADORA1,AGFG2,AHDC1,AKR1E2,ALAS2,ALOXE3,ALPK1,ANKHD1,ANKRD2,ANKRD52,AP3S1,APOD,AQP8,AQR,ARHGDIA,ARMC4,AS3MT,ASGR1,ATOH1,ATP2A2,ATP4A,ATP5D,ATP6V0E1,BCKDK,BCL2L14,BCR,BMP15,BPIFA1,BPIFA3,BSCL2,BTN2A2,BUB3,C13orf33,C14orf118,C15orf48,C17orf59,C20orf111,C20orf46,C2orf50,C3orf77,C6orf27,C7orf59,C9orf43,C9orf68,CAP2,CAPN10,CAPZB,CBLB,CBX5,CCDC160,CCRL1,CD300LD,CD40…
hsa-miR-299-3p	AARS2,ABCC8,ABHD16B,ABI3,ACAT2,ACRBP,ACSF2,ACTL9,ACTR6,ADAD1,ADAMTSL1,ADD1,ADH5,AIF1L,ALG14,ALOX12,ALPK2,AMH,ANGPT2,ANO2,ANO8,ANXA1,ANXA9,APBB1,APEX1,ARAP3,ARHGAP4,ARHGAP6,ATP13A2,ATP2B4,ATP2C1,B4GALNT3,BAD,BBOX1,BCKDHB,BCL3,BPIFA1,BRE,BTBD17,BTG4,BTNL8,C12orf76,C14orf102,C19orf53,C19orf59,C1R,C1orf74,C1orf87,C20orf112,C20orf43,C2orf66,C2orf78,C3orf22,C7orf11,C8orf47,C9orf68,C9orf84,CABIN1,CACNG3…
hsa-miR-299-5p	ABCC8,ABCD3,ABHD16B,ACTR6,ACTRT2,AHDC1,AHSG,AIF1L,ALDH18A1,ALG14,ALKBH1,ALOX12,ALOX5AP,AMDHD1,AMFR,ANAPC1,ANGPT2,ANKRD58,ANO9,APOA1BP,ARHGAP8,ARHGDIB,ARMCX2,ARMCX3,ARSJ,ATP1B1,ATP2B4,ATP6V0D2,AVL9,AZGP1,BBS2,BCAN,BCKDHB,BEND6,BMS1,BRAF,BTK,C10orf88,C10orf93,C11orf35,C12orf35,C12orf45,C12orf76,C14orf1,C15orf41,C17orf62,C1orf172,C1orf35,C1orf51,C1orf74,C20orf112,C21orf58,C2orf42,C4orf17,C5orf34,C6o…
hsa-miR-29a	ABCB6,ABTB1,ACBD5,ACO1,ACTR5,ADA,ADAMTS10,ADPRHL2,ADSL,AFG3L2,AIMP2,AKAP10,ALKBH3,ALOX5AP,AMOT,ANGEL2,ANGPTL4,ANKRD13C,ANKRD49,ANKRD56,AP4B1,APP,AQP11,ARAP3,ARF5,ARHGAP22,ARMCX5,ARPC5,ARRDC2,ARSF,ARVCF,ASB2,ASPHD1,ATF2,ATP5G1,ATP8B5P,AXDND1,BCAT2,BEAN1,BIN2,BIRC2,BLMH,BSND,BTBD17,C10orf54,C10orf68,C11orf30,C11orf31,C12orf63,C14orf133,C17orf59,C19orf6,C1orf122,C1orf131,C1orf74,C20orf29,C20orf96,C2…
hsa-miR-29a_star	ABI2,ACAT2,ACBD6,ACSL6,ADAT2,ADRA1A,AEBP2,AGBL2,AGT,AGXT2L1,AGXT2L2,AHI1,AHR,AK7,AKNAD1,ALDOB,ALKBH2,ALOX5,ALS2CR11,ANAPC2,ANKRD1,ANKRD35,ANKRD44,ANKRD56,ANXA13,AP4B1,APOA1BP,APOB,APOO,ARR3,ASCL2,ATF2,ATP2A2,ATPAF1-AS1,B3GNT1,BANK1,BBS2,BBS9,BCCIP,BCL2L14,BEST3,BET3L,BMX,BPTF,BRCA2,BTBD8,C10orf58,C11orf54,C12orf52,C13orf15,C18orf19,C18orf62,C19orf34,C1orf111,C20orf187,C20orf26,C6orf164,C6orf94,C8…
hsa-miR-29b-1_star	ABHD11,ACAT2,ACBD6,ACOT4,ACSL6,ACTB,ADAM28,ADAT2,ADRA1A,AEBP2,AGBL1,AGXT2L2,AIF1L,ALDH1A2,ALDH2,ALDOB,ALKBH3,ALS2CR11,ANKRD35,ANKRD6,ANKZF1,ANXA13,APH1B,APOL5,APOO,ARHGEF9,ARMCX5,ASB7,ASPHD1,ATP2A2,ATP4A,ATP6V1G3,ATP8B2,B4GALNT2,B4GALT7,BIRC2,BPTF,BRCA2,C10orf107,C11orf54,C13orf15,C15orf40,C17orf65,C18orf21,C18orf62,C20orf187,C20orf26,C2orf15,C3orf20,C8G,C9orf131,C9orf135,C9orf174,C9orf3,C9orf85,…
hsa-miR-29b-2_star	ABCA7,ABHD11,ACAT2,ACSM3,ACSS3,ADAM28,ADRA1A,AGBL1,AKNAD1,ALG5,ALKBH3,ALS2CR11,ANKRD35,ANKRD44,ANKRD6,ANKZF1,ANXA13,APBA3,APOO,ARHGEF9,ARMCX5,ARR3,ASB5,ASB7,ASNS,ASPHD1,ATP8B2,B4GALT7,BPIFB2,BPTF,BTBD8,C10orf107,C10orf90,C11orf31,C11orf91,C14orf48,C15orf17,C15orf40,C17orf50,C17orf65,C18orf21,C18orf56,C19orf21,C19orf34,C20orf26,C2orf15,C6orf103,C6orf164,C8G,C8orf85,C9orf131,C9orf3,CA6,CACNA2D3,CBL…
hsa-miR-29b	AACS,ABCB6,ABTB1,ACBD5,ACO1,ADA,ADAMTS10,ADAMTS18,ADAMTS20,ADPRHL2,ADSL,AFG3L2,AHSG,AICDA,AIMP2,AKAP10,ALDH6A1,ALKBH3,ALOX5AP,AMOT,ANGEL2,ANGPTL4,ANKRD49,APP,AQP11,ARAP3,ARF5,ARMCX5,ARPC5,ARSF,ARVCF,ASB2,ASPHD1,ATAD5,ATF2,ATP5G1,ATP5SL,AXDND1,B3GALT1,BCAT2,BEAN1,BIN2,BIRC2,BLMH,BRAP,BRD1,BSND,BTBD17,C10orf68,C11orf31,C11orf9,C12orf63,C12orf65,C1orf131,C1orf74,C20orf29,C20orf62,C20orf96,C2orf28,C5…
hsa-miR-29c	ABTB1,ACBD5,ACO1,ADA,ADAMTS10,ADAMTS18,ADPRHL2,ADSL,AFG3L2,AHSG,AICDA,AIMP2,AKAP10,ALKBH3,ALOX5AP,AMOT,ANGEL2,ANGPTL4,ANKRD13C,ANKRD49,ANKRD56,AP4B1,APP,AQP11,ARAP3,ARF5,ARHGAP22,ARMCX5,ARPC5,ARRDC2,ARSF,ARVCF,ASB2,ASPHD1,ATP5G1,ATP5SL,AXDND1,B3GALT1,BCAT2,BEAN1,BIN2,BIRC2,BLMH,BSND,BTBD17,C10orf68,C11orf30,C11orf31,C11orf63,C12orf63,C12orf65,C14orf133,C19orf6,C1orf131,C1orf74,C20orf29,C20orf96,C…
hsa-miR-29c_star	AADAC,AARS,ACTB,ADAT3,AGBL2,AGXT2L1,AKNAD1,ALOX5,ALPK1,AMIGO1,AMTN,ANGPTL6,ANKDD1A,ANKRD44,ANKS3,APBA3,APOL5,AREGB,ARL6IP4,AXIN2,BATF,BCL9,BMPR1B,BRIX1,BTD,C10orf107,C10orf90,C11orf54,C11orf91,C14orf48,C18orf56,C19orf21,C19orf57,C1QTNF8,C1orf85,C20orf85,C3orf58,C3orf67,C6orf130,C6orf94,C9orf174,C9orf3,C9orf85,CA3,CA6,CADPS2,CAPN3,CAPZA3,CASP10,CBR1,CBWD7,CC2D1A,CCDC107,CCDC115,CCDC116,CCDC24,CCDC…
hsa-miR-300	AACS,AAMP,ADSSL1,AHSA1,AIMP2,AKAP9,ALMS1,ANKRD1,ANXA5,AP2A1,AQR,ART3,ASPHD2,ASS1,ATAD5,ATG16L2,ATP5H,B3GAT3,B9D1,BAIAP2L2,BEND5,BMX,BST1,C12orf59,C12orf63,C13orf15,C14orf2,C17orf90,C1GALT1C1,C1QBP,C1orf63,C2orf40,C6orf204,C8orf42,C9orf103,CARD16,CARTPT,CCDC34,CCDC43,CCDC66,CCL23,CCNA2,CCT8,CD19,CD40,CDC123,CDCA3,CDH20,CDK8,CDKN2AIP,CEP152,CEP192,CETN2,CETN3,CHMP4B,CIRBP,CISD2,CKAP2,CLDN14,CLPX,CN…
hsa-miR-301a	ABCB7,ABHD3,ABHD5,ACAT2,ACER1,ACPL2,ACTR10,ACVR1,ADAM23,AFG3L2,AKAP1,AKR1D1,ALG13,ALS2CR12,ANXA10,APCDD1,APEX2,APOOL,ARL6IP1,ARPP21,ARX,ASB4,ASCL1,ATAD3B,ATG4D,ATP12A,ATP6V0D1,ATPAF2,AVEN,B2M,BAI3,BARHL2,BCL11A,BCL2L14,BTBD10,BTBD3,C11orf96,C12orf11,C12orf44,C18orf55,C18orf8,C1S,C22orf15,C2orf15,C2orf47,C3orf64,C4orf29,C5,C5orf30,C6orf211,C7orf25,C7orf42,C8B,C8orf76,C9orf64,C9orf72,CA5A,CALML5,CA…
hsa-miR-301b	ABCB7,ABHD3,ABHD5,ACAT2,ACER1,ACPL2,ACTR10,ADAM23,ADRB2,AFG3L2,AKAP1,AKR1D1,ALG13,ALOX5,ALS2CR12,ANXA10,APCDD1,APEX2,APOOL,ARL6IP1,ARX,ASCL1,ATAD3B,ATG4D,ATP12A,ATP6V0D1,ATPAF2,AVEN,AVIL,B2M,BAI3,BARHL2,BBS12,BCL2L14,BRD1,BTBD10,BTBD3,C11orf96,C12orf11,C12orf39,C12orf44,C18orf55,C18orf8,C1S,C22orf15,C2orf15,C2orf47,C3orf64,C4orf29,C6orf211,C6orf35,C7orf42,C8B,C8orf76,C9orf64,C9orf72,CA5A,CALML5,C…
hsa-miR-302a	ACAA1,ACAD9,ACADVL,ACSS3,ACTR10,ADAM23,ADHFE1,ADORA2B,AEBP1,AGAP2,AGTR2,AHCY,AHRR,AIFM1,AIRE,AK2,ALCAM,ALDH1A1,AMY2B,ANKRD46,ANKRD9,APCS,APOBEC4,ARHGAP30,ARID4A,ARIH1,ARPC3,ARSH,ASB9,ASCC3,ASF1A,ASF1B,B3GNT5,B9D2,BACE2,BAD,BAMBI,BEST2,BLVRA,BNIP1,BOC,BPY2,BRIX1,BTD,C10orf108,C10orf96,C11orf82,C11orf88,C14orf177,C15orf40,C1GALT1,C1orf141,C1orf168,C1orf63,C20orf24,C2orf40,C2orf47,C2orf57,C3orf55,C5…
hsa-miR-302a_star	AAMP,ABCA6,ACOT11,ADAMTSL1,ADRA1A,AP3M2,ARHGAP15,ARHGAP29,ARHGEF5,ARMCX1,ASB16,ASF1A,ASGR2,ASTE1,ATP9A,AVL9,AWAT2,BAD,BBS9,BCAS2,BCCIP,BCL2L11,BLZF1,BRAP,BTG3,BUB3,C10orf112,C10orf88,C12orf28,C16orf88,C17orf42,C17orf80,C18orf19,C1orf129,C21orf59,C5orf25,C5orf35,C6orf103,C6orf115,C7orf63,C8orf38,C9orf103,C9orf23,CBFB,CCDC23,CCDC56,CCL2,CCL20,CCNL1,CCP110,CDC42BPA,CDH2,CENPJ,CER1,CFH,CHRDL1,CKS1B,C…
hsa-miR-302b	ACAA1,ACAD9,ACADVL,ADCY5,ADHFE1,AEBP1,AGAP2,AGAP4,AGAP5,AGAP6,AGAP8,AHRR,AIFM1,AIRE,AK2,AKR7A2,ALCAM,ALDH1A1,AMY2B,ANAPC16,APCS,APH1B,APOBEC4,APOOL,ARHGEF18,ARHGEF40,ARID4A,ARIH1,ARL4D,ARMC2,ARPC3,ARSF,ARSH,ASB9,ASCC3,ASF1A,ASF1B,ATAD2,B3GNT7,B9D2,BAD,BAG2,BAMBI,BCL6,BEST2,BLVRA,BNIP1,BPHL,BPY2,C10orf108,C10orf96,C11orf82,C14orf177,C15orf40,C19orf2,C1GALT1,C1orf141,C1orf168,C1orf63,C20orf103,C20o…
hsa-miR-302b_star	AAMP,ABCA6,ABRA,ACO1,ACOT11,ACOT12,ADAD1,ADAM22,AFAP1L2,AIG1,AKR7A2,ANKRD7,AP3D1,APOB,AQP11,ARGLU1,ARHGAP15,ASGR2,ASTE1,ASZ1,ATG2B,ATG4C,ATP6V1B1,ATP6V1F,ATP9A,ATXN7,AVL9,B3GNT5,BCL2L11,BMP15,BOLA1,BRAF,BUB3,C10orf28,C10orf90,C11orf41,C11orf88,C12orf35,C14orf149,C16orf87,C16orf88,C1orf129,C1orf172,C1orf51,C1orf61,C20orf196,C2orf28,C2orf40,C2orf42,C2orf80,C3orf14,C4orf33,C4orf43,C5,C5orf25,C6orf10…
hsa-miR-302c	ABHD11,ACAA1,ACAD9,ACADVL,ADAMTS18,ADCY5,ADHFE1,AEBP1,AGAP2,AHRR,AIFM1,AIRE,AK2,AKR7A2,ALDH1A1,AMY2B,ANAPC16,ANKRD46,APCS,APH1B,APOBEC4,APOOL,ARHGEF18,ARID4A,ARIH1,ARL4D,ARL6IP4,ARMC2,ARPC3,ARSH,ASB9,ASF1A,ASF1B,B3GNT5,BAD,BAG2,BAMBI,BCL6,BEST2,BLVRA,BNIP1,BPY2,BTD,C11orf82,C14orf177,C15orf40,C16orf89,C19orf2,C19orf48,C1orf141,C1orf168,C1orf63,C20orf24,C20orf26,C2orf40,C2orf47,C2orf57,C3orf55,C5o…
hsa-miR-302c_star	ACO1,ADAD1,ADAM22,ADRA1A,ANKRD7,AQP11,ARGLU1,ARHGAP29,ARHGEF5,ASZ1,ATP6V1B1,ATP6V1F,ATP9A,AVL9,BAD,BCL2L11,BLZF1,BOLA1,BORA,BRAF,BRAP,BTG3,BTLA,C10orf28,C10orf88,C11orf41,C11orf88,C12orf50,C12orf51,C14orf38,C16orf88,C17orf42,C1orf172,C1orf31,C1orf51,C21orf59,C2orf42,C3orf14,C5orf25,C6orf57,C9orf21,C9orf85,CARS2,CAST,CCDC112,CCDC53,CCDC62,CCL2,CCNL1,CDKN2C,CENPJ,CER1,CHEK1,CKS1B,COL21A1,COQ2,CRADD…
hsa-miR-302d	ACAA1,ACAD9,ACADVL,ADAM23,ADHFE1,ADORA2B,AEBP1,AGAP2,AGAP4,AGAP5,AGAP6,AGAP8,AHRR,AIFM1,AK2,AKR7A3,ALDH1A1,AMY2B,ANAPC16,APBB2,APCS,APH1B,APOBEC4,ARHGAP30,ARHGEF18,ARID4A,ARIH1,ARL4D,ARMC2,ARSF,ARSH,ASB9,ASF1A,ASF1B,ATP6V0B,BAD,BAG2,BAMBI,BEST2,BLVRA,BNIP1,BPIFB3,BPY2,BRIX1,C10orf108,C11orf82,C14orf177,C15orf40,C16orf89,C1orf141,C1orf168,C1orf63,C20orf24,C2orf40,C2orf57,C3orf18,C3orf55,C4orf29,C5…
hsa-miR-302d_star	AAMP,ACO1,ACOT11,ADAD1,AFAP1L2,AIG1,AKR7A2,ANKRD7,ANXA9,APOB,ARGLU1,ARHGAP15,ARHGEF38,ARMCX1,ASGR2,ATP10B,ATP6V1B1,ATP6V1F,ATP9A,ATXN7,AURKA,AVL9,B3GNT5,BCL2L11,BMP15,BOLA1,BRAF,BTLA,BUB3,C10orf28,C10orf90,C11orf41,C11orf88,C14orf149,C16orf87,C16orf88,C18orf19,C1orf129,C1orf172,C1orf50,C1orf51,C20orf196,C2orf15,C2orf28,C2orf42,C2orf56,C2orf80,C3orf14,C4orf43,C5,C5orf35,C6orf103,C6orf186,C6orf58,C…
hsa-miR-30a	ABCA12,ABCC10,ABCG5,ACBD5,ACTA1,ACTC1,ACTR10,ADAM22,ADAM28,ADAM7,ADAM9,AGBL4,AK7,ALDH2,ALDH9A1,ALG5,ALKBH3,ANKRD20A4,ANKRD22,ANKRD33,AP2A1,AP3S1,APCDD1,ARID3A,ARL6,ARL6IP6,ASB3,ASB4,ASCC3,ASZ1,ATP2A2,AVEN,AVL9,B3GALNT2,B4GALT6,BARX1,BEAN1,C11orf63,C11orf82,C12orf24,C12orf48,C15orf24,C17orf79,C1QL1,C1S,C1orf162,C1orf174,C1orf74,C22orf28,C2orf65,C5,C6orf115,C6orf165,C7orf43,C8orf45,C8orf76,C9orf86,…
hsa-miR-30a_star	ABCB7,ABCF3,ABHD2,ACYP2,ADA,ADAT2,AEBP1,ALKBH3,AMZ2,ANGPTL5,ANKHD1,ANKRD30BL,ANKRD6,APOBEC2,APOH,ARMC4,ARPC1A,ASB3,ATF2,ATF3,ATG16L1,ATP2A1,ATP6V1B1,ATP9B,BANP,BATF,BCLAF1,BEST1,BOD1,BRIX1,C10orf2,C11orf10,C12orf28,C12orf35,C12orf54,C13orf27,C16orf89,C19orf59,C19orf70,C1GALT1,C1QBP,C1orf135,C1orf61,C22orf40,C2orf51,C4orf6,C5,C7orf11,C7orf25,C9orf68,C9orf80,CA6,CACNA2D3,CAP1,CAPS,CARD17,CCDC136,CC…
hsa-miR-30b	ABCA12,ABCA6,ABCC10,ABCE1,ABCG5,ACBD5,ACTA1,ACTC1,ACTR10,ADAM22,ADAM28,ADAM7,ADAM9,ADAMTS6,AGBL4,AHSG,ALDH2,ALDH9A1,ALG14,ALG5,ALKBH3,ANKLE2,ANKRD20A4,ANKRD22,ANKRD33,ANKRD34B,ANKS4B,ANXA7,AP2A1,AP3S1,ARID3A,ARL6,ARL6IP6,ARVCF,ASB3,ASB4,ASCC3,ASZ1,ATP13A5,AVEN,AVL9,B3GALNT2,BAZ1A,BAZ2B,BCL9,BCOR,BEAN1,BEST4,BOD1,BPIFC,C10orf96,C11orf54,C11orf82,C12orf24,C12orf48,C17orf42,C17orf79,C1QL1,C1S,C20orf…
hsa-miR-30b_star	AARS2,AARSD1,ABHD2,ACCN3,ACOT6,ADAM29,ADD1,AFF4,AGXT2L1,AHDC1,AIM2,ALDH1L1,ANAPC16,ANKRD30BL,ANKRD33,AP3B2,APOC2,APOC3,APRT,ARPC1A,ATG16L1,ATG4D,ATP13A5,ATP2A1,ATP2C2,ATP6V0D2,ATPAF2,AZU1,BACH2,BATF,BEND7,BMPR1B,BPIFB3,BPIFB4,BPNT1,BTBD6,BTNL8,C10orf35,C13orf27,C18orf34,C18orf55,C19orf20,C19orf57,C1orf105,C1orf167,C1orf85,C20orf85,C2orf51,C2orf62,C3,C4orf6,C7orf25,C9orf85,C9orf86,C9orf9,CA5A,CA6,…
hsa-miR-30c-1_star	ABCF3,ABHD14A,ADAM30,ADCK2,AGBL4,AGER,AIM2,AMICA1,ANKHD1,ANKRD37,APOBEC3B,APOC3,APRT,ARHGAP32,ARHGAP36,ARIH1,ARL5C,ART5,ATF3,ATG4D,ATL3,ATPAF2,BACH2,BARX2,BCAM,BEND7,BLNK,BMP1,BPIFA3,BTNL8,C11orf88,C14orf166B,C19orf45,C19orf57,C1orf105,C20orf201,C20orf85,C22orf43,C9orf86,C9orf96,CA5A,CA6,CALY,CAMK2A,CAPN13,CAPNS1,CCDC102A,CCDC135,CCDC62,CCDC78,CCL17,CCL21,CCND3,CCR7,CD163,CDC42EP1,CDCA3,CDY1B,CEP…
hsa-miR-30c-2_star	AAAS,ABCF3,ACOT4,ADAM30,ADCK2,AGBL4,AIM2,AMICA1,AMZ2,ANKRD37,AP1G2,AP3B2,APOBEC3B,APRT,ARHGAP32,ARHGAP36,ARIH1,ARL5C,ARPC2,ART5,ATG2A,ATG4D,ATL3,ATPAF2,B4GALT3,BACH2,BCKDHA,BEND7,BMP1,BTNL8,C11orf88,C14orf166B,C19orf45,C19orf57,C1orf105,C1orf85,C20orf201,C20orf85,C21orf59,C22orf43,C9orf86,C9orf9,C9orf96,CA5A,CA6,CALY,CAMK2A,CAPN13,CAPN9,CAPNS1,CASP14,CCDC102A,CCDC14,CCDC62,CCDC78,CCL21,CCR7,CCRN4…
hsa-miR-30c	ABCA12,ABCA6,ABCB1,ABCC10,ABCC5,ABCE1,ABCG5,ACBD5,ACSL1,ACTA1,ACTC1,ACTR10,ADAM22,ADAM28,ADAM9,ADORA2B,AGBL4,ALDH2,ALDH9A1,ALG5,ALKBH3,ANKLE2,ANKRD20A4,ANKRD22,ANKRD33,ANKS4B,ANP32B,ANXA7,AP2A1,AP3S1,APOBEC1,ARID3A,ARID4A,ARL6,ARL6IP6,ASB3,ASB4,ASCC3,ASZ1,ATP2A2,ATP6V1H,AVEN,AVL9,B3GALNT2,BCL9,BCOR,BEAN1,BOD1,BPIFC,C10orf112,C10orf96,C11orf82,C12orf48,C16orf53,C16orf7,C17orf79,C19orf69,C1QL1,C1S,…
hsa-miR-30d	ABCA12,ABCC10,ABCG5,ACBD5,ACTA1,ACTC1,ACTR10,ADAM22,ADAM28,ADAM7,ADORA2B,AGBL4,AK7,AKAP10,ALDH2,ALDH9A1,ALG14,ALG5,ALKBH3,ANKLE2,ANKRD20A4,ANKRD22,ANKRD33,AP2A1,AP3S1,ARID1A,ARID4A,ARL6,ARL6IP6,ASB3,ASCC3,ASZ1,ATP2A2,AVEN,AVL9,B3GALNT2,BCL9,BCOR,BEAN1,BEST4,BRAF,C11orf54,C11orf63,C11orf82,C12orf24,C12orf48,C15orf24,C17orf56,C17orf79,C1QL1,C1S,C1orf162,C1orf74,C22orf28,C2orf65,C5,C6orf115,C6orf165…
hsa-miR-30d_star	ABCB7,ABHD2,ACYP2,ADA,ADAT2,ADORA2B,AEBP1,AFF4,AIM2,ALKBH3,AMZ2,ANKHD1,ANKRD30BL,ANKRD6,ANXA1,APOBEC2,APOBEC3B,APOH,ARMC4,ARPC1A,ARPC2,ART5,ASB3,ATF2,ATF3,ATP9B,B4GALNT3,BANP,BATF,BCCIP,BCLAF1,BOD1,BPIFB4,BRIX1,C10orf112,C11orf10,C11orf57,C11orf82,C12orf28,C12orf35,C12orf54,C13orf27,C14orf166B,C16orf89,C17orf80,C1GALT1,C1QBP,C1orf61,C22orf40,C2orf51,C5,C7orf11,C7orf25,C9orf68,C9orf72,C9orf80,C9or…
hsa-miR-30e	ABCC10,ABCG5,ACBD5,ACTC1,ACTR10,ADAM7,ADK,AGBL4,AK7,ALDH2,ALKBH3,ANKRD20A4,ANKRD22,ANKRD33,ANXA3,ANXA7,AP2A1,AP3S1,ARID1A,ARID3A,ARID4A,ARL6,ARL6IP6,ASB3,ASB4,ASCC3,ASZ1,ATP2A2,AVEN,AVL9,B3GALNT2,B4GALT6,BARX1,BAZ1A,BEX5,C11orf54,C11orf63,C11orf82,C12orf24,C12orf48,C14orf28,C17orf79,C18orf8,C1QL1,C1S,C1orf101,C1orf135,C1orf162,C22orf28,C2orf65,C5,C6orf115,C6orf118,C6orf165,C7orf43,C8orf76,C9orf86…
hsa-miR-30e_star	ABCB7,ABCF3,ABHD2,ACYP2,ADA,ADAT2,ADORA2B,AEBP1,ALKBH3,AMZ2,ANKHD1,ANKRD6,APOBEC2,APOH,ARMC4,ARPC1A,ASB3,ATF2,ATF3,ATG16L1,ATP2A1,ATP9B,BANP,BATF,BCCIP,BCLAF1,BEST1,BRIX1,C10orf112,C10orf2,C11orf10,C12orf28,C12orf35,C12orf54,C13orf27,C16orf89,C17orf80,C19orf59,C19orf70,C1orf61,C22orf40,C2orf51,C4orf6,C5,C7orf11,C7orf25,C7orf28B,C9orf68,C9orf80,CACNA2D3,CAP1,CARD17,CCDC136,CCDC59,CCDC62,CCDC73,CCD…
hsa-miR-31	AACS,ABCB9,ACADL,ACCS,ACP2,ADCK4,AGBL5,AGPHD1,AGT,AHSG,AKAP8,AKR1B1,ALDOC,ANAPC11,ANAPC5,ANKMY1,ANP32B,APBA2,APBB2,ARID1A,ARPC3,ASTE1,ATCAY,AVPR2,BAIAP2L2,BAMBI,BRAP,BRE,C12orf52,C15orf23,C16orf42,C17orf47,C17orf80,C19orf63,C1orf105,C1orf150,C1orf56,C1orf85,C20orf26,C2orf80,C4orf26,C6orf62,C7orf25,C8orf58,CALR,CBY1,CC2D2A,CCDC18,CCDC60,CCDC90B,CCL23,CCNC,CD48,CD79B,CDK2,CDKL2,CDY1,CHPT1,CHST4,CMP…
hsa-miR-31_star	AADACL2,ALMS1,ARHGEF1,ARL17A,AS3MT,ATF2,ATN1,ATP13A5,ATP5A1,AVEN,B3GNTL1,B9D2,BCS1L,BDKRB2,C1orf110,C1orf159,C22orf23,CACNG3,CANT1,CARTPT,CASP5,CBX8,CCDC122,CCDC83,CD40,CKAP5,CNOT1,CSNK2A2,CSRP2BP,CYB5R1,DDRGK1,DIDO1,DSG3,EFHC1,ENOX1,FADS3,FAM9B,FGF3,FOXA1,GLYCTK,GPR22,GRM5,GSS,HAUS4,HDAC8,HK1,HMGB1,HMGB2,HRCT1,HS6ST2,HSPB11,IARS,IL5RA,INSL5,IRX2,KIAA0391,KIAA1324,LCE1B,LIAS,LMBRD1,MAP1LC3B2,MCM4…
hsa-miR-32	AADACL3,AARS,ACAT2,ACTC1,ADARB2,ADM,AGR3,ANO2,ANP32E,ANXA10,ANXA7,ARHGEF10,ARHGEF17,ARID1B,ARL1,ARL6IP5,ARMC2,ATG3,ATP6V1B2,AURKA,BCAT2,BCOR,BRI3,C11orf24,C11orf87,C12orf65,C19orf12,C2orf69,C3AR1,C3orf33,C6orf136,C8orf34,C9orf150,CABS1,CACNB4,CALCA,CASP8AP2,CASS4,CCDC89,CCK,CCNG2,CCR9,CD69,CDH10,CDH8,CDKL4,CDKN1C,CEP41,CES5A,CETN1,CHD7,CHST7,CIC,CNGA1,CNRIP1,COG3,COL1A2,COL27A1,CRADD,CREB1,CRYZ,C…
hsa-miR-320	ABCA2,ABCC10,ACOT9,ADAD1,ADAM19,ADAMTS12,ADAMTSL1,AHDC1,ALDH6A1,AMBN,AMDHD1,APRT,ARHGAP21,ARHGAP31,ARHGAP4,ARHGEF26,ARMC6,ASCC2,ASS1,ATG9A,ATP2A3,B9D2,BAX,BNIP3,BPIFA1,BRDT,BRE,BRI3,BZW2,C10orf93,C15orf24,C15orf26,C15orf43,C17orf75,C17orf96,C1RL,C6orf136,C7orf44,C9orf4,CANT1,CCDC111,CCDC136,CCL1,CCNB2,CCT3,CD37,CDH20,CDK13,CDK5RAP1,CDKL3,CEACAM20,CENPV,CES1,CETN3,CGA,CHD1L,CHGA,CHIT1,CHST12,CHTF8…
hsa-miR-323-3p	AARSD1,ABHD16B,ABHD6,ABI1,ACADVL,ACVRL1,ADAT2,ADCK5,ADIPOR1,AGT,AIFM1,AKAP17A,AKR1E2,ALPK2,ALS2,ANKRD26,ANKRD34B,ANXA7,AP2S1,APEH,APOM,APOOL,AQP11,AQP7,ARFIP1,ARL1,ARX,ASB10,ASNS,ASPRV1,ATP2A1,B3GALT1,BCL11A,BCL2A1,BEND7,BLVRA,BMP1,BMP3,BRAP,BRF1,C11orf61,C11orf73,C14orf102,C14orf135,C15orf61,C17orf81,C4orf21,C7orf11,C7orf46,CABYR,CAND1,CAPN8,CASK,CASP3,CCDC39,CCDC61,CCL2,CCM2,CCNL1,CD164L2,CD69,…
hsa-miR-323-5p	ABCA2,ABCB9,ABCF2,ABHD16B,ABHD8,ACE,ACER2,ACTL9,ADAP2,ADCK5,AGFG2,AHRR,AKAP17A,ALDH3A1,AMZ1,ANAPC4,ANKRD33B,AP2S1,APOA4,APOBR,ARAP1,ARHGEF1,ARHGEF17,ARPC5L,ASPSCR1,ATG7,ATP12A,ATP13A2,ATP1A3,ATP2A1,ATP5D,B4GALNT2,B4GALNT3,BAIAP2L2,BAIAP3,BATF3,BEST2,BIRC7,BPIFA2,BPIFB1,BPIFB3,BRD4,C10orf125,C10orf76,C11orf61,C12orf52,C15orf40,C15orf55,C16orf48,C17orf56,C17orf72,C19orf12,C19orf2,C19orf70,C1QL1,C1Q…
hsa-miR-324-3p	AADACL4,ABCA3,ABLIM2,ABTB1,ACBD4,ACE,ACTN4,ADAMTS12,ADAMTS8,ADAMTSL2,ADCK2,ADCK5,AEBP1,AGFG2,AKR1E2,ALS2CL,ANKRD23,ANKRD54,ANO10,ANO8,APBA1,APBA2,APOE,APOM,APRT,AQP7,ARHGAP17,ARL6IP4,ARRDC2,ARVCF,ASNA1,ASPHD1,ATAD3A,ATP12A,ATP2B2,ATP4A,ATP6V0D1,ATP6V1E1,AUP1,B3GALT6,B9D1,BAI1,BARHL1,BOK,BPI,BRD2,BRD4,BRSK1,BRSK2,BSCL2,BST2,BTBD8,BTD,C10orf125,C12orf44,C12orf52,C14orf49,C14orf80,C17orf56,C17orf74,…
hsa-miR-324-5p	ABCB9,ABTB1,ACE,ACSS2,ACTN4,ACTRT2,AEBP1,AGFG2,AGTRAP,AIM1L,AMDHD2,ANGEL1,ANKK1,ANO9,AOAH,AP2A1,APOM,APP,AQP10,AQP7,AQP9,ARF3,ARHGAP27,ARHGAP33,ARHGAP35,ARHGEF1,ARHGEF10L,ARPC1B,ARSI,ARVCF,ATF3,ATP13A2,ATP2B2,ATP4A,ATP5D,ATP5G1,ATP6V0D1,ATP8B1,AVL9,AXL,AZGP1,AZI1,B4GALT3,BAIAP3,BBX,BIK,BIRC7,BNIP1,BPI,BRD2,BRD4,BRSK1,BSCL2,BST2,BTBD11,BUB3,C10orf125,C10orf93,C12orf10,C15orf39,C17orf46,C19orf21,C1…
hsa-miR-325	ABCA1,ACBD5,ACP6,ACTL8,ADAD2,ADAMTSL5,AKR1B10,ALDH1L2,ALOX5AP,ALPK1,ANAPC5,ANKRD53,AP4B1,APOC2,APOD,ARAF,ARHGAP6,ARL1,ARL14,ARPP21,ARSJ,ASB10,ASB2,ASH2L,ATL1,ATP1B1,ATPIF1,B3GAT3,BCAT1,BMP15,BMPER,BPIFB3,BRF2,BRIX1,BSND,BSPRY,C11orf52,C11orf82,C12orf5,C12orf51,C14orf28,C16orf52,C16orf79,C17orf57,C18orf19,C1orf110,C22orf31,C3orf54,C5orf34,C6orf105,C6orf127,C6orf130,CASP9,CCBL2,CCDC158,CCDC59,CCDC7…
hsa-miR-326	ABCG5,ACADS,ACER1,ACP2,ACRBP,ACSF3,ADAM29,ADC,ADCK5,AFG3L2,ALPL,ANKS3,APBA2,APBB1,AQP3,AQP8,ARC,ARHGDIA,ARID5A,ARMC5,ARVCF,ASB2,ATP6V0D1,AZI1,BAIAP3,BEST1,BPIFB4,C11orf49,C15orf27,C19orf25,C19orf71,C3orf25,C7orf51,C8G,C9orf117,C9orf24,CADM4,CALR,CAPN10,CAPN12,CCDC134,CCDC33,CCDC64B,CCDC86,CCL17,CCL21,CCM2,CD300LG,CD72,CDC34,CDC42EP1,CDH16,CDH22,CDH24,CDH26,CDK5RAP1,CDK9,CDX1,CEL,CENPB,CHMP6,CKM,C…
hsa-miR-328	AANAT,ABHD14A,ABHD8,ACAD10,ACCN4,ACRBP,ACSS2,ACTN4,ADAMTS14,ADAMTS4,AGAP2,AGAP3,AGPAT2,AMIGO3,ANK1,ANKLE2,ANKRD13D,ANKRD23,ANKS3,ANKZF1,ANXA6,AP2A1,AP3D1,AQP10,AQP3,ARHGAP22,ARHGAP30,ARHGEF16,ARHGEF17,ARHGEF18,ARHGEF25,B3GNT8,BARHL1,BCAR1,BMP1,BST2,C10orf93,C13orf33,C15orf27,C16orf48,C16orf57,C16orf89,C17orf70,C19orf25,C1QTNF4,C1orf172,C1orf85,C21orf33,C2orf27B,C5orf56,C6orf47,C8orf55,C9orf116,C9…
hsa-miR-329	AARS2,AARSD1,ABCC5,ACER2,ACSF3,ADAD1,ADC,ADCK3,AGXT2L1,AHNAK,AIRE,ALKBH3,ALKBH4,ANAPC11,ANKHD1,ANO1,AOC3,APBA1,APTX,AQP3,ARHGEF25,ASNS,ATP6V1G3,AUP1,B4GALT7,BAIAP3,BCAP31,BCAR1,BCL2L10,BPI,BRD9,BRF1,BRF2,C10orf35,C10orf67,C10orf93,C11orf53,C19orf69,C1orf101,C1orf216,C1orf35,C20orf112,C20orf62,C21orf58,C2orf53,C3orf39,C6orf126,C9orf25,CABLES1,CAPZB,CARD11,CASP8AP2,CBX1,CCDC18,CCDC61,CCDC88C,CCDC91…
hsa-miR-32_star	ADAM17,APOO,ATF1,C13orf27,C1orf101,C9orf103,CCDC112,CCT3,CD200R1,CDKN2C,CENPI,CFHR4,COX5B,CRISP1,CSN1S1,CTNNA3,CXorf48,DEPDC7,DIP2A,EIF2A,FAM92A1,FRMD3,GBX2,GTF2H2C,HEATR3,HELZ,KIAA1109,KIAA1279,KRT78,LILRB5,LMBRD1,LPAR6,LRIT1,LRRC63,MDH1,MMS22L,MRPS33,NAF1,NDUFB6,NFIL3,NGF,OCIAD2,OMA1,OR4K13,OR8I2,PCCB,PCID2,PPP1CB,PSIP1,PSMA3,RBBP6,RINT1,RPS6KA6,SLBP,SVOPL,TTC35,UCHL3,UGGT2,UPP2,VPS72,VWDE,ZNF2…
hsa-miR-330-3p	ACCN4,ACER1,ACP6,AGFG2,AHCY,ALAS2,ALOX15B,ANAPC11,ANKMY1,ANKRD37,ANKRD5,ANO1,AOAH,AP2M1,AP3B1,APBB2,APCDD1,APTX,AQP11,AQP8,ARFGAP2,ARFRP1,ARHGAP10,ARHGAP8,ARHGAP9,ARHGEF38,ARHGEF5,ARID5B,ARPC1B,ART1,ASGR1,ASPRV1,ATG9A,ATN1,ATP6V1B2,ATP8B5P,BBS2,BCAR3,BCAS4,BCL2L12,BCMO1,BFSP1,BFSP2,BIRC2,BTBD6,C10orf128,C10orf137,C11orf57,C11orf63,C11orf73,C12orf51,C12orf65,C14orf118,C15orf55,C16orf48,C16orf62,C1…
hsa-miR-330-5p	AAMP,AANAT,ACADS,ACAP3,ACER1,ACP2,ACRBP,ACTL9,ADAM29,ADC,ADCK1,ADCK4,AFAP1,AFG3L2,ALMS1,ALOX15B,AMDHD2,ANKMY1,ANKRD2,ANKRD5,ANKS3,AOAH,APBA3,AQP3,AQP5,AQP8,ARFRP1,ARHGEF16,ARHGEF5,ARID5A,ARID5B,ARMC5,ARVCF,ATL3,AZI1,B9D2,BAIAP2L2,BCAM,BEST1,BPIFB3,BPIFB4,BPIFB6,BRD8,BST2,BTBD6,C12orf43,C12orf51,C14orf38,C14orf48,C15orf27,C15orf55,C16orf48,C17orf59,C17orf81,C1orf182,C3orf25,C4orf36,C7orf43,C8G,CAB…
hsa-miR-331-3p	ABCB9,ABHD14A,ABTB1,ACAP3,ACCN4,ACIN1,ACYP1,ADAM15,ADAMTS10,ADCK2,ALPPL2,AMBRA1,AMDHD2,AP1G2,AP2A1,AP3S1,AP4S1,APBA1,APRT,AQP5,ARF5,ARHGEF16,ARID5A,ARL6IP4,ASTL,ATOH8,ATP5D,AVPR2,AZI1,B3GAT3,B3GNT8,B4GALT3,BAIAP2L2,BCAR1,BEST2,BIN1,BPI,BRD4,BRSK1,BST2,C12orf57,C14orf80,C15orf58,C15orf59,C17orf82,C19orf10,C19orf56,C19orf71,C19orf80,C1QTNF4,C1orf127,C1orf170,C1orf74,C2orf27B,C3orf25,C9orf131,C9orf2…
hsa-miR-331-5p	ACAP3,ACSM3,AFF4,ALOX5AP,ALPPL2,ANKMY1,APBB1,APBB3,APOBEC2,APTX,AQR,ARL14,ARRB2,ASB11,ATF1,AVIL,B3GNT1,B4GALT3,BATF3,BCAN,BCAR1,BEST3,BPIFB2,BPNT1,BZW2,C12orf41,C14orf133,C16orf61,C19orf51,C19orf80,C1orf74,C20orf151,C6orf125,C6orf58,C7orf28B,C9orf11,C9orf9,CA14,CAPN1,CAPN5,CAPS2,CBLN4,CC2D1A,CCDC102A,CCDC132,CCDC153,CCDC42,CCL21,CCZ1,CD36,CD48,CEP290,CES4A,CHRNA1,CHST2,CHST8,CLN3,CLPTM1,CLUAP1,CO…
hsa-miR-335	ABCD2,ABL2,ACO2,ACSF3,ACTL9,AHSG,ALDH6A1,ALDOB,AP3S1,APEH,ARF4,ARPC5L,ASB11,ASH2L,ATG16L2,ATP13A3,ATP6V0A4,B3GNT8,BCAR1,BMP3,BMX,BOLA1,C10orf112,C10orf129,C11orf74,C12orf62,C14orf118,C17orf75,C17orf99,C1orf172,C1orf87,C2orf80,C4orf29,C4orf32,C6orf170,C6orf47,C7orf11,C8orf47,C9orf150,C9orf156,CACNB2,CAPS2,CBWD1,CBWD3,CBWD5,CBWD6,CCDC18,CCDC28A,CCL1,CCL5,CCNT2,CCR3,CDC34,CENPV,CEP192,CERS5,CHCHD1,C…
hsa-miR-335_star	ANKLE2,APOOL,ARMC2,ATP5O,C12orf50,CBWD6,CDK7,CNTN5,CXorf64,CYP2J2,DDX1,DHRS3,DMRT2,DOCK6,EFEMP2,EHMT1,EMB,EME1,ENTHD1,ENTPD1,FAM26D,GNG11,GOLT1A,GRIA1,HEATR5B,HEBP2,HSPB11,IFI44,IGF1,IGFBPL1,ITGB5,KCNA4,KCNE2,KCNMA1,KIF9,LRP2,MED11,MPDZ,MRPL37,NAA35,NCKAP1L,NMI,NTM,OLFML2B,PPCS,PPP2R5C,PTHLH,RORA,RPRD2,RPS21,SLC6A4,SMYD2,SPCS1,STATH,TAGAP,TDRD5,TFB2M,TMEM14C,TMEM95,TMSB10,TOE1,TTLL5,UBE2H,UHRF1BP…
hsa-miR-337-3p	ABCD3,ABI3BP,ACAA1,ACMSD,ADAM22,ADAP2,ADH7,ADK,AGBL4,ALKBH3,ALKBH8,ANKRD1,ANXA10,AP3S1,APP,ARHGEF26,ARMC6,ARMC7,ATG4C,ATL2,ATP12A,ATP13A4,ATP1B1,ATP4B,AZGP1,B4GALT3,B4GALT7,B9D2,BASP1,BCL11A,BDKRB1,BMP10,C10orf76,C12orf40,C14orf159,C15orf32,C19orf53,C19orf68,C1GALT1C1,C2orf73,C4orf37,C5orf63,C6orf165,C8orf48,C9orf116,C9orf43,CA14,CA2,CABP2,CALCA,CBX1,CCDC74A,CCDC74B,CCL13,CD164L2,CD48,CD52,CDHR3,…
hsa-miR-337-5p	A4GALT,ABHD5,ABHD8,ACAD8,ACSBG2,ACTR3B,ADCY5,ADH5,AGBL5,AGT,AKAP17A,ALKBH3,ALPK2,ANKRD17,ANKRD2,ANKRD26,ANP32B,AP3S1,APC2,AQR,ARL1,ARMCX3,ARPC2,ARSJ,ATF3,ATN1,ATP12A,ATP13A4,ATP2C1,ATP6V0B,AVPR2,AXDND1,BCL10,BCL11A,BCL2L12,BET3L,BHLHE40,BMP15,BPIFB2,BRD8,BRK1,BRSK1,C10orf128,C10orf137,C10orf68,C10orf76,C11orf34,C11orf80,C12orf26,C14orf37,C15orf32,C15orf40,C16orf55,C16orf58,C19orf48,C1orf162,C21or…
hsa-miR-338-3p	ABCC12,ABCC6,ACP2,ACSM5,ACVR1,ADAMTS6,ADCK3,ADRBK1,AGAP3,AHSP,ALKBH5,AMACR,ANKRD37,APOA5,APOL2,ARFGAP3,ARHGAP22,ARHGAP4,ARHGEF10L,ARMCX1,ARPC1B,ASCL4,ASPHD2,ATP4A,ATP5G1,AVEN,B4GALT7,BCAT2,BEST4,BIN2,BMP6,BMX,BPY2C,C10orf57,C10orf68,C10orf81,C10orf93,C11orf31,C14orf159,C15orf43,C17orf46,C19orf77,C1orf100,C1orf123,C20orf46,C2orf42,C6orf162,C7orf44,C7orf63,C8orf48,C9orf103,C9orf71,CACNB4,CAD,CATSPE…
hsa-miR-338-5p	ABCA6,ABCC12,ABHD12B,ABI3BP,ABTB2,ACSL6,ADAM2,AIMP1,AMMECR1,ANKRD37,ANKRD49,ANKRD56,ANXA7,AP2M1,AP4B1,ARFGAP3,ARHGAP21,ARIH1,ARNTL2,ART1,ATF7,ATP1B4,ATP6V0A4,ATP8B1,ATP9A,B3GAT2,BCKDHB,BEX2,BIRC2,BMX,BNIP2,BOC,BPY2C,BRD1,BRDT,BTG3,BUB1B,C10orf32,C10orf93,C11orf52,C11orf82,C12orf11,C12orf24,C12orf34,C12orf48,C13orf15,C14orf159,C15orf55,C18orf26,C19orf12,C1orf50,C20orf132,C20orf85,C2orf47,C3orf64,C…
hsa-miR-339-3p	A3GALT2P,ABHD14B,ABHD15,ACAA1,ACACB,ACCS,ACSBG2,ACTL7A,ADA,ADAMTS20,ADAMTSL2,ADARB2,ADCYAP1R1,ADRM1,AFG3L1P,AHSG,AKT1S1,AMIGO3,ANAPC2,ANGPT4,ANK3,ANKRD24,ANKRD9,ANO9,AP1G2,APEH,APOA1,ARAP1,ARFGAP1,ARHGAP10,ARHGAP22,ARHGAP30,ARID3A,ARID5A,ARX,ASCL4,ASGR1,ASPG,ASPHD1,ATG7,ATP6V0A4,ATP6V0B,ATP7B,ATP9A,AURKC,BAI1,BAIAP2,BAP1,BCAT1,BEST2,BOP1,BRD9,BRSK2,BTBD2,C12orf34,C14orf133,C14orf166B,C14orf80,C16…
hsa-miR-339-5p	ABI3,ABP1,ACAD8,ACSS2,ACTL7A,ADAMTSL2,ADCK5,ADCYAP1R1,ADH5,AGPAT2,AJAP1,AKAP10,AMICA1,AMIGO3,ANKZF1,AOAH,AP2A1,AP3D1,APEH,AQP5,AQP8,ARHGAP30,ARID5A,ARL6IP4,ARVCF,ASGR1,ASL,ASNS,ASPG,ATG4D,ATP2C2,ATP4A,ATRIP,BAIAP2,BAMBI,BATF,BCAT1,BEST2,BOP1,BRSK1,BTBD17,C12orf34,C15orf27,C16orf48,C16orf61,C16orf89,C17orf62,C19orf25,C19orf54,C1orf85,C1orf88,C21orf59,C22orf15,C2orf54,C2orf62,C2orf82,C6orf223,C7orf…
hsa-miR-33a	AACS,AADAC,ABCA1,ABCC2,ABTB1,ACY3,ADAM12,ADC,ADRM1,AGBL2,ALDOB,ALG12,AMHR2,ANAPC1,ANGPTL6,ANKHD1,ANUBL1,ANXA1,ANXA3,APOBEC3B,ARHGAP21,ARHGEF38,ARMC9,ARMCX5,ARPC2,ARX,ASB10,ATG2B,ATP13A2,ATP5A1,ATP5S,ATP6V0E1,B3GALT2,BAI3,BATF,BBOX1,BTBD2,BUB3,C10orf99,C11orf2,C11orf58,C12orf24,C14orf80,C15orf33,C16orf57,C16orf80,C19orf6,C1orf162,C1orf43,C20orf103,C3orf54,C3orf77,C6orf191,C6orf27,C8orf83,C9orf129,…
hsa-miR-33a_star	AADAC,ACYP2,ADAM21,ALG14,ANKAR,ANKRD58,AP3S1,ARIH1,ARMCX2,ARR3,ART5,ASPM,BPIFB4,C11orf31,C12orf11,C12orf28,C15orf48,C20orf24,C2CD4B,C3AR1,C7,C7orf28B,C8orf84,CACNA2D1,CACNG1,CATSPER2,CCDC62,CCL1,CCL2,CCZ1,CD37,CDK7,CENPC1,CHCHD1,CIR1,CLDN16,COMMD7,CSRP2,CXCL11,CYP2C19,CYP2C9,DAD1,DBR1,DCUN1D2,DDX4,DHRS7C,DHX8,DOK3,DOPEY1,DPYS,EBNA1BP2,EDC4,ELAVL2,ENPP2,ENSA,EPGN,ESPL1,FAM179B,FAM181A,FAM184B,FBXL…
hsa-miR-33b	ABCA1,ABCC2,ABCE1,ABRA,ABTB1,ACAA1,ACTL7A,ADAM12,ADC,AGBL2,ALG12,AMHR2,ANAPC1,ANGPTL6,ANK1,ANO8,APOBEC3B,AQP8,ARHGEF38,ARMCX5,ARPC1A,ARPC2,ARSK,ASB10,ATG2B,ATP13A2,ATP5A1,ATP5D,ATP5S,B3GALNT2,B3GALT2,BAI3,BATF,BMP3,BTBD2,BUB3,C10orf99,C11orf2,C11orf41,C12orf24,C14orf80,C15orf33,C16orf80,C18orf34,C19orf6,C1QB,C1orf162,C1orf43,C20orf103,C3orf77,C6orf123,C6orf191,C6orf204,C8orf83,C9orf129,C9orf21,C9…
hsa-miR-33b_star	AADAC,ACAA1,ACCN3,ADAMTSL5,ADPRHL2,ANKHD1,AP3S1,APBB3,ARIH1,ARIH2,ATP12A,ATP6V0B,BRF2,BZW2,C11orf84,C2CD4B,C3AR1,C3orf54,C5orf38,C7,C8orf48,C9orf86,CACNA2D1,CATSPER2,CCDC94,CD22,CD37,CD99,CHCHD1,CLPTM1,COMMD7,CSRP2,CYP2C19,CYP2C9,DBC1,DCBLD1,DGKA,DHRS7C,DNAH1,DOK3,DPYSL4,DSG4,EBP,ENSA,EPGN,ERI3,FAM134A,FAM171A2,FAM179B,FAM181A,FAM184B,FAM3D,FAM65A,FAT2,FBXW4,FGF1,FILIP1L,G6PD,GLOD5,GMPR2,GNMT,GPR…
hsa-miR-340	AADAT,AASDH,ABCC2,ABCG2,ACTC1,ADRA1A,ALAS1,ALPK2,AMPD1,ARHGAP33,ARMCX5,ASB3,BAI3,BCOR,BOC,BRD1,BRIX1,BUB1B,C10orf122,C10orf96,C14orf149,C17orf79,C1D,C5orf22,C6orf115,C6orf57,C8orf34,C8orf76,C8orf84,CAPN10,CAPN9,CAPRIN2,CARS2,CAV2,CCDC102A,CCDC34,CCDC47,CCDC64,CCDC82,CCL20,CCT7,CDCA3,CDH1,CEP120,CEP290,CEP57L1,CETN3,CHEK2,CHMP4C,CISD2,CLEC4M,CLK1,CLP1,COPB2,CRELD2,CRISP2,CRTC3,CRYM,CSMD3,CSRP2,CST…
hsa-miR-340_star	AMELY,ANKRD13D,ATP6V1B1,BANP,BCL2L11,BCL2L13,BNIPL,BRSK1,CAPN10,CCT3,CETP,CGB5,CHST5,CRB3,DUSP15,ELOVL3,EMILIN1,FKBP1B,GAS6,GATA1,GDF11,GGT5,GJD4,GRWD1,HOXD4,IZUMO2,LRRC42,METTL6,MPDU1,MRPS16,MRPS21,NFATC3,NPHS1,POU2F1,PRSS57,PRTN3,PUM1,RBBP6,RBM10,ROGDI,ROM1,S100A1,SAMD15,SIRT2,STAG3L1,STAG3L2,SULT1A1,THOP1,TMIGD2,TRAPPC6A,TRIM31,TXNL4A,UBE2Q2P1,WDR31,WDR62,WDR65,ZNF383,ZNF554
hsa-miR-342-3p	AAMP,ABCF2,ABHD16B,ACOT12,ACVRL1,AFF4,AFP,ALDH9A1,ALKBH6,ANGPTL2,ANKHD1,ANKMY1,ANKRD49,ANXA8,ANXA8L1,ANXA8L2,AP1M2,AP2S1,ARHGAP21,ARHGDIB,ARR3,ASPH,ATG4D,ATP6V0B,ATP6V1G3,ATP9B,AZGP1,B4GALNT2,BCAR1,BCL2L1,BCL2L10,BNC1,BNIPL,BPIFB1,BST2,BTK,C10orf35,C10orf68,C10orf93,C16orf59,C17orf59,C17orf65,C19orf54,C19orf77,C1orf144,C1orf222,C20orf106,C20orf111,C21orf7,C6orf126,C9orf116,CABP4,CAMKMT,CARHSP1,CA…
hsa-miR-342-5p	A3GALT2P,AACS,ACLY,ACOT12,ADAD2,ADAT3,AHNAK2,AKAP4,ALDH16A1,ALDH1L1,ALG12,AMH,ANAPC11,ANGPTL6,ANKRD52,ANO10,AOAH,AP2S1,AQP5,ARAP1,ARHGDIB,ARHGEF16,ASPSCR1,ATG4D,ATN1,ATP4A,AUP1,BAIAP2L2,BCL2L1,BCL2L10,BLK,BTK,C10orf125,C10orf93,C15orf40,C15orf44,C17orf59,C19orf10,C19orf63,C21orf58,C2orf28,C9orf64,C9orf86,CADM4,CALB2,CARHSP1,CBX2,CCDC86,CCT7,CD34,CDA,CDC34,CDC42EP5,CDH23,CDH24,CEP164,CEP72,CHRD,CH…
hsa-miR-345	A3GALT2P,ABHD11,ABHD14A,ACADS,ACTR1B,ADH4,ADHFE1,ADRA1A,ADRBK2,AGPAT4,AIMP2,AKT2,AMDHD2,AMN,ANKRD58,AP2A1,APBB1,APH1A,APOBR,APOO,AQP5,ARC,ARHGAP22,ARL2,ARMC7,ARRDC2,ASPHD2,ATP6V1B2,AWAT2,B3GAT3,B4GALNT3,BBS4,BDKRB1,BEND5,BEST1,BHLHE40,BLNK,BRAT1,BRMS1,BST1,BTBD17,BTNL8,C10orf2,C10orf93,C12orf51,C15orf42,C17orf96,C19orf68,C19orf70,C1QC,C1orf54,C20orf144,C20orf196,C21orf33,C21orf58,C2orf62,C4orf21,…
hsa-miR-346	AARS2,ABCC12,ABLIM2,ADAMTS8,ADAMTSL1,ADC,ADRA1B,AIFM3,ANKS3,APEH,AQP5,ARHGDIA,ARHGEF1,ARMC6,ASPHD2,ATG4B,ATP1A4,ATP5EP2,ATP6V1E1,BAI1,BCL6,BCL6B,BIN2,C11orf49,C11orf80,C11orf95,C12orf52,C12orf65,C15orf40,C17orf81,C19orf28,C19orf71,C19orf80,C1orf170,C1orf228,C1orf95,C20orf29,C8orf85,C9orf116,CABP7,CALN1,CAMK2N2,CARD11,CARM1,CCDC101,CCDC37,CCR10,CD8A,CDH15,CFLAR,CHMP4B,CHST8,CHTF18,CIB2,CLEC4F,CNPY…
hsa-miR-34a	AATF,ABCA2,ACAA2,ACSL4,ACTA1,ACTL6B,ADAMTS4,ADAMTSL5,ADK,ADRA1D,AIFM1,AIP,AK8,AKAP3,ALOX5,ALX3,AMN,ANAPC2,ANKHD1,ANO10,ANXA5,AP2S1,APBA1,APOH,AQP3,AQP8,AREGB,ARHGAP30,ARHGDIB,ARHGEF25,ARID5A,ARIH1,ARSJ,AS3MT,ASB1,ASB4,ASPHD1,ATG2A,ATP13A1,ATXN7L3,AXL,AZI1,B3GALNT2,B3GAT3,B4GALT2,BARHL2,BAX,BCAN,BCAT2,BCKDK,BCL2L14,BEAN1,BEST2,BIK,BRAT1,BRI3,BTG4,C10orf128,C11orf2,C12orf57,C14orf166B,C14orf2,C17or…
hsa-miR-34a_star	AADACL3,ABCB1,ACBD5,ACOX3,ACSM1,AFF4,AGBL4,ALG1,ALG12,APBA1,ARG2,ARID4B,ARMCX5,ASXL1,ATP5J2,ATP6V0B,ATP6V1F,ATXN2,AVEN,AXDND1,B3GAT3,B3GNT4,BCS1L,BEND7,BMP5,BPIFA2,BPIFA4P,BPIFB3,BRF2,BTBD8,C15orf44,C19orf21,C1GALT1C1,C1orf159,C1orf55,C21orf59,C2orf15,C5orf48,C6orf103,C7orf53,C9orf71,CCDC107,CD300LF,CD79A,CDH7,CER1,CGA,CHAMP1,CKS1B,CLASRP,CLEC4D,CLEC6A,COL11A2,COL25A1,COL7A1,CPT1A,CRELD2,CRTC3,CR…
hsa-miR-34b	ABCC11,ABLIM2,ACAA2,ACADS,ACTR3,ADAMTSL3,ADSL,AGBL2,AGXT2,AHSG,AICDA,AK7,ALDH1B1,ALG13,AMICA1,AMZ2,ANKRD12,ANKRD49,ANKS3,AP3B2,AP3S1,AP4B1,APOA1BP,APOL3,APOOL,ARHGEF17,ARHGEF9,ARL13A,ARL3,ASB1,ASB16,ASCC1,ATG7,ATOX1,ATP6V1D,ATP6V1E1,ATP6V1H,AUH,AZI1,B4GALT6,BACH1,BAHCC1,BBS9,BCL2L10,BCL2L12,BEST2,BEST3,BIN3,BMP2K,BMS1,BRIX1,BROX,BTBD8,C10orf28,C10orf32,C14orf133,C14orf149,C14orf2,C14orf28,C15orf1…
hsa-miR-34b_star	ABCB1,ACBD5,ACOT12,ACSL6,ADORA2B,ALG1,AMTN,ANKRD33,ANO7,AP2S1,APBA1,APLNR,ARG2,ARIH1,ASPHD1,ASXL1,ATP1B3,ATXN2,B3GAT3,BEND7,BEST1,BEST2,BPIFB3,BTBD8,BTG4,C11orf73,C12orf11,C15orf44,C1QC,C1orf159,C20orf62,C21orf59,C2orf15,C5orf48,C6orf103,C6orf165,CALML5,CCDC107,CCDC76,CCK,CCR3,CD3E,CD79A,CDA,CDH7,CDK5RAP1,CEP72,CGA,COBRA1,COL11A2,CPT1A,CRELD2,CRTC3,CUEDC2,CXorf67,DAO,DCBLD1,DLL1,DMRT2,DNAJC18,DNA…
hsa-miR-34c-3p	A4GALT,AAMP,AARS2,ABHD16A,ACADS,ACTL6B,ACTR10,ADAM18,ADAMTSL3,AGBL2,AGXT2,AHSG,AICDA,AIG1,AKR1C4,ALDH1L1,ALG13,AMICA1,AMTN,ANKRD24,ANKRD36,ANXA5,AP3B2,AP4B1,ARHGAP4,ARHGEF17,ARMCX6,ASS1,ATG7,ATP1A2,ATP6V1D,ATXN7L1,AZI1,B4GALT7,BBOX1,BCL2L10,BCL2L11,BCL2L12,BEST2,BNIPL,BRAP,BSPH1,BTBD11,BTBD8,C11orf31,C12orf44,C14orf109,C14orf149,C14orf180,C14orf2,C14orf28,C15orf17,C17orf80,C19orf46,C20orf103,C20o…
hsa-miR-34c-5p	AADAC,ABCC12,ABCC3,ABCD1,ACTL6B,ADAM15,ADAMTS4,AIFM1,AIP,AK8,AKAP3,AKIP1,AKTIP,ALOX5,AMTN,ANAPC2,ANXA5,AP2S1,APBA1,APBB2,APLNR,AQP3,AQP8,ARHGDIB,ARHGEF25,ARHGEF9,ARID5A,ARIH1,ARMC6,ARMCX6,ARSJ,ATG2A,ATOX1,ATP13A1,ATP5SL,ATP6V1E1,ATPIF1,B3GALNT1,B3GAT3,B4GALT2,BAX,BCAN,BCKDK,BCL2L14,BEST1,BEST2,BRAT1,BRI3,C10orf28,C10orf32,C10orf81,C11orf10,C12orf44,C12orf57,C14orf166B,C14orf2,C15orf48,C19orf40,C1…
hsa-miR-361-3p	A4GALT,ACADS,ACAT1,ACTR5,ADAMTS10,ADAP1,ADARB2,ADC,ADCK1,ALDH3B2,ALDH8A1,AMN,ANAPC11,ANPEP,AP1G2,AP2A1,APOA1BP,APRT,ARAF,ARHGEF1,ARHGEF10,ART1,ASB3,ATP6V0D1,B9D1,BCORL1,C10orf11,C10orf125,C10orf93,C11orf30,C12orf5,C12orf62,C15orf40,C19orf20,C19orf28,C19orf29,C20orf111,C2orf43,C3AR1,C3orf45,C6orf154,C9orf131,CA7,CACNG1,CADM4,CAPN10,CARD11,CCDC88B,CCHCR1,CCL19,CD3EAP,CD79A,CERS4,CHD4,CKM,CLEC4G,CNT…
hsa-miR-361-5p	ABHD2,ACADS,ACOX3,ACSM3,ACTG1,ADAM30,ADC,ALDH6A1,ALS2CR8,ANAPC11,ANKRD33,ANKRD49,APLP2,ARAF,ARAP1,ARF4,ARGLU1,ARMC4,ARPC5L,ART1,ATG2B,ATP13A3,ATP6V0A4,ATP6V1E2,ATPAF1,B4GALT3,B9D1,BCAR3,BCCIP,BCDIN3D,BCORL1,BEND7,BMP2K,BRIP1,C10orf58,C12orf5,C12orf62,C13orf27,C14orf135,C17orf101,C20orf24,C2orf78,C3orf18,C6orf115,C7orf23,C9orf131,C9orf150,C9orf46,CA6,CACNG1,CALHM2,CATSPERG,CBLB,CC2D2B,CCDC111,CCDC…
hsa-miR-362-3p	AARSD1,AASS,ABCA12,ABCC5,ABI2,ABLIM2,ACER2,ACSF3,ADAD1,ADAMTSL4,ADC,ADCK3,AFP,AHNAK,AJAP1,ALDH4A1,AMFR,ANAPC11,ANKHD1,ANKLE2,ANXA9,AOC3,APBA1,ARHGAP21,ARHGEF25,ARL4D,ASB16,ASPG,ATF7IP,ATG4B,ATP13A3,ATP6V1G3,BCAR1,BEND5,BLCAP,BPI,BPIFB1,BRD4,BRD9,BRF2,BTBD17,C10orf35,C11orf74,C17orf79,C17orf99,C19orf69,C1orf101,C1orf216,C20orf62,C2orf53,C3orf25,C3orf39,C3orf45,C6orf126,C9orf29,C9orf64,C9orf71,CABL…
hsa-miR-362-5p	A2M,ABCB11,ABCG5,ACACB,ACER3,ACTG2,ACTL9,ADAD1,ADAM23,ADAMTS17,ADCYAP1,ADH5,ADHFE1,ADORA2B,AGBL1,AGBL4,AKNAD1,ALDH4A1,ALG13,AMBN,AMFR,ANGPTL4,ANXA9,APOH,APRT,ARHGEF25,ARPC3,ASGR1,ASH2L,ASPH,ATIC,ATP6V0D1,ATP6V0D2,AVL9,AVPR1A,B3GALT1,B4GALNT3,B4GALT2,BABAM1,BCAS2,BCAT2,BEND5,BFAR,BIRC2,BLZF1,BRD8,BRF2,BTLA,C10orf54,C14orf80,C19orf28,C19orf34,C1QL3,C1QL4,C1S,C1orf101,C1orf141,C1orf43,C20orf173,C20o…
hsa-miR-363	AARS,ABCG4,ACAA1,ACAT2,ACOX1,ACP5,ACTC1,ADAMTS16,ADCK5,ADM,AFG3L2,AGR3,AMACR,AMPD1,AMPH,ANP32E,ANXA10,ANXA7,AOAH,AP2S1,APC,ARHGEF10,ARMC2,ASB7,ASRGL1,ATP6V0A4,ATP9A,AUH,AURKA,AXDND1,BAZ2B,BCAR3,BCAT2,BMP4,BOLA1,BPNT1,BRS3,C10orf137,C11orf24,C14orf109,C16orf53,C17orf109,C20orf112,C3orf33,C6orf136,C9orf150,C9orf21,CABS1,CALCA,CASKIN1,CASP3,CBLN4,CCNG2,CCT2,CD69,CDC27,CDKN1C,CDYL2,CETN1,CHKA,CHRDL2,…
hsa-miR-363_star	ABHD16B,ACBD6,ACOT6,AKIP1,AKR1E2,ANGPT2,ANKRD33,ANKS3,AQP3,ARHGDIB,ARHGEF25,ARL13A,ASB16,ATCAY,BAD,BAI1,BATF3,BCAT2,BEGAIN,BZRAP1,C19orf69,C20orf46,C22orf15,C6orf25,C9orf85,CACNG7,CASP12,CD1B,CD3G,CIITA,CKM,CLEC4D,COPE,CTSH,CYS1,DDX24,DLGAP1,DLGAP3,DNAJC28,DTNB,DUSP15,ECE2,EVPL,EXOC3L4,FGD3,GNG3,GON4L,GP6,GTF2E1,HCLS1,HDLBP,HEATR5A,HGSNAT,HS3ST6,HSD3B1,HSD3B2,IL12RB1,INMT,ITPR1,KANK3,KCNK17,KCTD1…
hsa-miR-365	ABHD16B,ABHD3,ABHD6,ACAA1,ACER1,ACPP,ACSM1,ACVR1,ADAM30,ADM,ADPGK,ADRA1B,AEN,AFAP1L1,AGFG2,AGMAT,AKAP11,AMOTL2,ANKRD17,ANKRD28,ANKRD49,ANKS1A,APEX2,APH1B,APOA1BP,ARFGAP2,ARHGEF16,ARL9,ARMC1,ARMC4,ARPC2,ARRB2,AS3MT,ATF2,ATP1A4,ATP2B3,ATP6V0A4,AVL9,AWAT1,BATF,BEST3,BMPER,BTBD3,BTD,C10orf128,C10orf27,C10orf62,C11orf53,C11orf58,C12orf68,C16orf58,C16orf71,C19orf29,C19orf56,C1QTNF6,C1orf106,C1orf146,C2…
hsa-miR-367	A1BG,ACAA1,ACACB,ACAT2,ACOT6,ACOX1,ACTC1,ADAMTS4,ADM,AGR3,ALDH1B1,AMPD1,ANKS4B,ANP32E,APOL1,ASB16,ASB7,ATP13A5,ATP6V0D2,ATP6V1B2,ATP8B3,AXDND1,AXL,BAZ2B,BCAT2,BCL6B,BMP3,BPNT1,BRAP,C10orf137,C11orf24,C11orf48,C11orf84,C12orf65,C14orf109,C16orf53,C16orf59,C17orf42,C19orf46,C19orf63,C1orf174,C1orf222,C1orf43,C20orf165,C3,C3orf33,C6orf136,C6orf94,C9orf21,C9orf46,C9orf85,CA6,CAMLG,CASP8AP2,CASS4,CAT,…
hsa-miR-367_star	ACRBP,ADSSL1,ARHGEF9,ARMCX1,ATF2,BRAP,C6orf154,C6orf203,CARTPT,CAST,CD52,CERS5,CHIC2,CLCA4,CLVS2,CMPK1,CRTC3,DCTN3,DNAH11,DNAJC1,DUSP8,DYM,EVI2A,FAM162B,FAM27A,FAM27B,FAM27C,FGF4,GGNBP1,GRM3,GTF3C5,HES3,HSPA4L,KCNJ8,KIAA1432,LILRB3,MET,MLL5,MPP4,MR1,NDUFV3,NPM1,NR2C2,NUP160,OBSCN,PADI6,PCDH7,PDZK1IP1,PHYHD1,PIGW,PIK3R5,PPYR1,PSRC1,RAB9A,RBM28,RGR,RGS12,RGS2,RNMT,RPS2,RUSC2,SFT2D2,SIRT5,SLC16A8,SM…
hsa-miR-369-3p	A2M,ABCA6,ABCB10,ABHD10,ABI3BP,ABRA,ACPP,ACSS3,ADAMTS19,ADAMTS6,ADRA1A,AGAP4,AGAP5,AGAP6,AGAP8,AIM2,AK2,AK7,AKAP10,ALG14,ALPK1,ANKHD1,ANKRD28,ANKRD42,ANKRD44,ANLN,AP2A1,APCS,APOBEC1,APOO,AQP11,ARHGAP29,ARL6IP5,ARMC2,ARPP21,ART3,ASB12,ATAD5,ATAT1,ATF2,ATP5S,ATP6V0A4,B9D1,BAMBI,BBS4,BCAR3,BCOR,BIRC3,BOLL,BORA,BPY2C,BRCA2,BUB1B,C11orf54,C11orf58,C12orf26,C12orf52,C14orf102,C15orf60,C17orf104,C17orf8…
hsa-miR-369-5p	AADAC,ABCA6,ACAT1,ACRBP,ACSM3,ACTB,ADH5,AGAP4,AGAP5,AGAP6,AGAP8,AGBL3,AIG1,ANKHD1,ANKRD33,ANKRD42,ANKRD43,ANLN,AP1AR,APPL1,AQP4,ART3,ASB1,ATAD5,ATF2,ATOH7,ATP2C2,ATP5S,AXIN2,BCAR3,BCCIP,BNIP3,BPY2C,BRAT1,C10orf137,C10orf68,C12orf52,C13orf27,C14orf159,C15orf24,C15orf55,C17orf104,C17orf56,C18orf54,C1orf110,C1orf111,C1orf93,C3orf19,C7orf11,C9orf135,CALCB,CAP1,CAPN8,CASP12,CCDC14,CCDC28A,CCDC34,CCL20…
hsa-miR-370	AARS,ABHD8,ACCN4,ACP5,ACSBG2,ACVR2B,ADAT3,ADCY6,ADPRHL2,AEN,AIFM2,AKT3,ALX3,ANO7,AP1G2,AP2S1,APBB1,APOBEC3F,ARMC7,ASB10,ASB16,ASPSCR1,ATG4D,ATOX1,ATP5SL,ATPAF2,AVL9,B3GNTL1,BEST1,BIN3,BRF1,BRSK2,C10orf116,C12orf10,C17orf74,C19orf28,C19orf68,C19orf70,C1QTNF6,C1orf127,C1orf43,C1orf86,C2,C20orf151,C20orf201,C20orf26,C22orf36,C2orf40,C2orf81,C3orf20,C6orf25,C7,CACNA1F,CALHM2,CALHM3,CAPN1,CARNS1,CCDC1…
hsa-miR-371-3p	AARS,ABCA3,ACAA1,ACAD11,ACOX2,ACTL7A,ADAM23,ADRA1B,AGPAT4,AIG1,AK7,ALKBH2,ALS2CR12,ALS2CR8,AMIGO3,AMOT,AMOTL1,ANGPT4,ANGPTL5,ANKRD29,ANKRD9,ANXA10,AP1G2,AP2A1,APBA3,APOOL,AQP11,ARAP3,ARHGAP22,ARHGAP4,ARIH1,ARL6IP4,ARX,ASGR1,ATG4D,ATP6V0D2,ATRIP,B3GALNT2,BACE2,BCCIP,BCS1L,BEND5,BIRC3,BLVRA,BMP2K,BRD8,BSND,C10orf125,C10orf35,C11orf49,C12orf53,C15orf27,C1GALT1C1,C1QL2,C1orf86,C3orf37,C4orf41,C5,C5or…
hsa-miR-371-5p	ABCC3,ABCF2,ACAD11,ACO2,ACTR10,ADAM30,ADH6,ADK,ALOX5AP,AMOT,ANGPTL6,ANKK1,ANKRD22,AP1B1,AP2A1,AP4S1,APAF1,ASZ1,ATF7IP2,ATOX1,ATP8B4,ATRIP,B3GNT3,BANP,BCAP31,BCCIP,BCMO1,BHLHE40,BLMH,BPIFB3,BRAT1,BRD8,BTG3,BUB3,C10orf58,C16orf46,C16orf59,C16orf95,C17orf57,C17orf72,C19orf45,C19orf52,C1orf150,C20orf72,C22orf25,C2orf43,C3orf38,C5orf46,C6,C6orf164,C8orf48,C9orf103,C9orf23,CAMK2G,CCDC121,CCDC136,CCDC23…
hsa-miR-372	ABHD11,ACER1,ADORA2B,ADSL,AIFM1,AK2,AKAP5,AMBN,AMBRA1,ANKRD16,ANKRD44,ANKRD9,ANP32B,APBB2,APH1B,ARHGEF10,ASL,ATP6V1D,BARX2,BLMH,BLVRA,BMX,BPNT1,BPY2,BRIX1,BSPH1,C11orf63,C11orf82,C15orf40,C2orf15,C2orf61,C7orf29,C7orf43,C9orf3,C9orf4,CABLES1,CAPN13,CASC5,CASP6,CASP8AP2,CCDC142,CCNA1,CD68,CDK2AP2,CEP104,CFLAR,CHADL,CHMP4C,CLRN3,CLSPN,CNN1,CRLF2,CSAD,CSRP2,CXorf40A,CXorf40B,CXorf67,CYP2D6,DDHD1,DDI…
hsa-miR-373	AARS2,ABCA6,ABHD11,ABHD15,ACER1,ACSS3,ADORA2B,AGAP10,AGAP9,AGMO,AK2,AMBRA1,ANKK1,ANKRD16,ANKRD44,APH1B,APOBEC4,ASCL3,ASF1B,ASL,ASTN2,BAMBI,BFAR,BNIP1,BPNT1,BRCA1,BSPH1,C10orf58,C10orf81,C11orf63,C11orf82,C12orf65,C15orf40,C19orf39,C19orf45,C20orf24,C2orf40,C2orf47,C5orf63,C6orf127,C6orf15,C7orf43,C9orf4,C9orf78,CAPN13,CASC5,CASP6,CCDC142,CCDC53,CCL5,CCNA1,CD68,CDH4,CENPL,CENPM,CENPN,CEP104,CFLAR,…
hsa-miR-373_star	ACO2,ADCY3,AFF2,AGXT2L1,ALDH6A1,ARHGAP9,ATXN7,BAG1,BLNK,BRD2,C13orf27,C14orf183,CCDC23,CDK5RAP3,CEP152,CHD1L,CNOT10,COMMD3,CSN1S1,DCUN1D5,DDX4,DDX55,DMKN,DTNA,EIF4G3,GPR63,GTF2F2,HDAC2,IFIT1B,IKBKG,IL1R2,INPP1,KCNQ2,KIAA1704,KIAA2013,KRTAP9-4,LAMA1,LGMN,LRRFIP2,LY6G6C,MAGEB2,MAGED4,MAGED4B,NTF4,PARP10,PFN1,PRTG,RBBP4,RDH8,RGSL1,RIT2,SAMD14,SHD,SLC17A2,SLC32A1,SLC6A2,SMPX,SNX18,SPIB,SRRD,STON1-GTF…
hsa-miR-374a	AADAT,ACSL6,ACTN1,ACTR10,ACYP1,AIMP1,ALS2CR11,AMBRA1,ANAPC10,ANKRD7,ARIH1,ASF1A,ASPN,ATAD5,ATF2,ATP1A1,BAMBI,BCOR,BIRC3,BOLA3,BRIX1,BUB1B,C10orf88,C11orf58,C12orf26,C12orf48,C14orf102,C14orf118,C18orf55,C3orf30,C5orf25,C6orf170,CASC1,CASC4,CAT,CCDC122,CCL11,CCL2,CCL7,CCNA1,CDC20B,CDY1,CENPK,CEP192,CHPT1,CHRDL2,CHRNA1,CHST2,CLDN14,CLEC1B,CNKSR2,COL4A1,COQ10B,CRB1,CRTC2,CSPP1,CTH,CTTNBP2,CYTIP,DAPP…
hsa-miR-374a_star	ABCA10,ABHD2,ABHD3,ADAMTS17,AGA,ALG14,AMACR,AMY1B,ANKLE2,APOOL,ARID4B,ARMC2,ARMCX5,ATG2B,ATP5J,BBS9,BCCIP,BCS1L,BHMT,BLNK,BTF3,C12orf50,C13orf27,C1orf100,C1orf146,C1orf31,C2orf56,C6orf103,C7orf53,C9orf23,CATSPER2,CCDC112,CCDC36,CCDC53,CCDC58,CCR10,CD48,CD9,CDC123,CDHR3,CLDN16,CLEC2D,CMTM8,CNTNAP3,CNTNAP3B,CRYZL1,CYP2C19,DAOA,DCTN6,DENND1B,DNAJC1,ECI2,EFHC1,EIF1AX,ELL3,EVI5,FAM135A,FAM162B,FAM188A…
hsa-miR-374b	ABCE1,ACLY,ACSL6,ACTN1,ACTR10,ACYP1,ADORA2B,AFAP1L2,AIMP1,ALS2CR11,ANAPC10,ANKRD1,ANKRD7,ANKUB1,ARIH1,ASF1A,ASNSD1,ASPN,ATAD5,ATF2,ATP1A1,BBS12,BCOR,BIRC3,BOLA3,BRDT,BRIX1,BUB1B,C10orf88,C11orf58,C12orf26,C14orf102,C14orf118,C18orf55,C4orf29,C5orf25,C6orf170,CALU,CASC1,CASC4,CAT,CCDC122,CCDC127,CCL11,CCL2,CCL7,CCNA1,CCNE2,CCNO,CD48,CDC20B,CDY1,CEP192,CETN3,CHRDL2,CHRNA1,CHST2,CLDN14,CLEC1B,CNKSR2…
hsa-miR-374b_star	AASS,ABHD2,ABHD3,ACSL6,AGA,AHSA1,ALG14,AMACR,AMY1B,ANKLE2,ARMC2,ASTE1,ATG2B,ATP6V1H,AVIL,BBS2,BBS9,BCCIP,BLNK,C1orf110,C1orf122,C1orf146,C1orf31,C6orf103,C7orf28B,C7orf53,C8orf47,C9orf153,C9orf23,C9orf3,CACNB2,CATSPER2,CCDC110,CCDC112,CCDC36,CCDC53,CCDC56,CCDC58,CCL4L1,CCZ1,CD48,CD9,CD99,CDHR3,CLDN16,CLEC2D,CMTM8,CNOT10,COL4A3,COX6B1,CRYBA1,CRYZL1,CYP2C19,DCTN6,DDRGK1,DDX43,DDX53,DENND1B,DOCK6,DY…
hsa-miR-375	ABHD11,ABI2,ADCK2,ADCY10,ADRA1B,AGRP,ALKBH7,ALMS1,ANAPC10,ANKRD37,ANPEP,ANXA3,AP2A1,AP4B1,APBB2,APOB,AQR,ARSI,ASB1,ATP2B2,ATP6V1H,AVP,BCL2A1,BIN1,BMX,BUD31,C10orf2,C11orf49,C12orf52,C14orf159,C16orf89,C17orf50,C19orf26,C1QB,C1QBP,C1orf110,C1orf162,C20orf85,C3orf77,C6,C9orf68,CACNA1B,CCDC146,CCDC94,CD72,CDC123,CDH20,CDK15,CHST7,CNOT10,CNOT2,COQ3,COX5A,COX7A1,CPPED1,CPSF3L,CR1,CRYBA4,CSAG2,CSAG3,CT…
hsa-miR-376a	AACS,ABCA3,ABCC2,ABI2,ACE,ACSL6,AIF1L,ALG13,ALMS1,ANO3,APOO,APP,ARFGEF1,ARSH,ASGR1,ATP6V1G1,ATP6V1H,ATP8B1,ATPAF1-AS1,B3GALNT2,BAG6,BCAT1,BEND5,BTG3,BUB3,C10orf111,C10orf122,C11orf61,C12orf11,C12orf26,C12orf51,C12orf56,C15orf48,C16orf80,C17orf101,C17orf90,C19orf2,C19orf45,C1orf105,C1orf135,C6orf58,C7orf59,C8orf4,C9orf116,C9orf96,CABIN1,CACNG1,CACNG6,CASC1,CASP12,CCDC122,CCDC162P,CCDC53,CCDC59,CCD…
hsa-miR-376a_star	ADCY3,ADD1,ALKBH8,AMN1,AMPD1,ANKRD31,APOBEC1,ATP5S,B3GALNT2,BAI1,BGLAP,BIK,BOLA3,BTBD16,BTG3,C18orf55,C1orf54,C3orf14,C9orf3,CACNA1G,CACNB2,CCR9,CGRRF1,CHSY3,CLEC4A,CNOT10,CNTRL,CSRP2,CYP27B1,CYP3A43,CYSLTR1,DHRS4,DHRS4L2,DLD,DNASE1L3,DOK6,EXD2,EXO1,FAM188A,FAM21C,FAM43B,FAM49A,FAM55A,FAM65A,FBXO32,FCRLB,FGB,FGF4,FMN2,GLRA1,GPSM2,GRIP1,GYS2,HIST1H2BD,HMGB1,HRASLS,HRASLS5,HSFY2,ILDR2,KCNA10,KCNK1,…
hsa-miR-376b	AACS,ABCA3,ABCC2,ABHD5,ABI2,ACE,ACSL6,AIF1L,ALG13,ALMS1,ALS2CR11,ANKRD10,ANO3,AOAH,APOO,APP,ARFGEF1,ARSH,ASB3,ASGR1,ATP6V1G1,ATP6V1H,ATP8B1,ATPAF1-AS1,B3GALNT2,BAG6,BCAT1,BICC1,BTG3,BUB3,C10orf10,C10orf107,C10orf111,C10orf122,C11orf61,C12orf11,C12orf26,C12orf51,C12orf56,C15orf48,C16orf80,C17orf101,C17orf90,C19orf2,C19orf45,C1orf105,C1orf135,C7orf59,C8orf4,C9orf116,CABIN1,CACNG1,CACNG6,CAPS2,CASC1…
hsa-miR-376c	ABHD16A,ACAT1,ACTR10,ADAMTSL1,ADH4,ADH6,AFP,AHSA1,AIFM1,AIRE,ALG6,ALMS1,AMFR,AMTN,ANAPC10,ANKRD10,ANKRD2,ANXA13,AP3D1,ARFGEF1,ARFRP1,ARID4A,ASZ1,ATG12,ATP13A3,ATP1A3,ATP4B,ATP5B,ATP6V1H,ATPIF1,AURKC,AVEN,B3GALTL,BAG6,BARX2,BOD1L,BTG3,BUB3,C11orf61,C12orf24,C12orf26,C15orf26,C15orf61,C16orf80,C1D,C1QA,C1S,C1orf101,C1orf105,C1orf135,C1orf172,C1orf35,C1orf74,C2orf80,C6orf115,C6orf57,C7orf31,C9orf116…
hsa-miR-377	ABHD16B,ABTB1,ACOT12,ACP6,ACTR6,ADH5,ADRBK2,ALKBH6,ALS2CR11,ALX1,ANKRD6,APITD1,AQP11,ARHGAP21,ARHGEF1,ARID1B,ASB8,ASCC3,ATP2B4,ATP5E,ATP6V1G3,ATXN7,AURKC,B3GNTL1,B4GALT6,BABAM1,BCAP31,BCL2L10,BEND5,BRF1,C10orf67,C11orf24,C14orf1,C16orf59,C1QL3,C1orf162,C1orf222,C1orf50,C20orf111,C20orf29,C2orf40,C6orf165,C6orf192,C9orf116,C9orf30,C9orf80,CALB2,CAMKMT,CAP2,CAPN9,CARD6,CARKD,CARTPT,CCDC132,CCNI,CCR…
hsa-miR-377_star	AARSD1,ADAM29,ADAMTS6,ANKRD24,ANO10,AQP11,ARHGEF1,BSND,BTNL9,C1orf49,C20orf132,C3orf33,C9,C9orf85,CBR3,CCDC87,CD163L1,CDH15,CDH18,CLTCL1,CLU,CNKSR1,COL6A2,COL8A2,COX7C,DAD1,DCLRE1C,DENND1C,DHH,ENSA,FAM105B,FBXW2,FGR,FLT4,FOXS1,GDF15,GLRX3,GNMT,GPR150,GSDMA,HEATR1,HPN,HYDIN,IDO2,IFI6,IL9R,ILDR2,KCNH3,KIF9,LBX2,LILRA5,LIPC,LMNA,LOXL1,LRRC42,MAGT1,MTFMT,MYC,NCBP1,NTF4,NTSR2,OR10H5,OVCA2,P2RY4,PHLPP2…
hsa-miR-378	ABCB1,ABCC9,ACO2,ACOX3,ADD2,ADHFE1,ADORA1,ADSL,AFF4,AGK,AHSA1,ALAS2,ALMS1,ALOX5,ANGPT4,ANKRD6,AP4B1,APOC2,AQP11,AQP8,ART3,ATP13A3,ATP2C1,ATP4A,ATP5J,BBS2,BMP2,BNIP1,BOLA1,BYSL,C12orf51,C15orf33,C17orf109,C17orf72,C17orf74,C17orf90,C19orf28,C19orf51,C1orf192,C20orf134,C20orf173,C6orf221,C7orf26,C9orf117,C9orf23,CAB39,CACNA2D4,CADM4,CALHM3,CAMSAP3,CAPRIN2,CBS,CCDC102A,CCDC121,CCDC42,CCDC58,CCDC70,C…
hsa-miR-378_star	ABCD1,AGPHD1,AGXT,ANO2,ASB8,ASCL3,B3GALT1,B4GALNT3,BRCA1,C15orf40,C19orf34,C19orf39,C19orf71,C1RL,C6orf154,C6orf221,C8orf85,C9orf78,C9orf84,CD68,CELA3B,CENPM,CEP104,CHMP4C,CLSPN,CMBL,CNNM2,COL11A2,COPE,COPZ2,CSAD,CSF2RA,CUL7,DCTN3,DDI2,DFNB31,DHDH,DHX58,DNAH17,DUOXA2,DZANK1,ECE2,ECSIT,EEF1A1P6,EIF3I,ELOVL5,EPB41L4A,EXOSC4,EXT2,FAM161B,FBLIM1,FCN2,FITM1,GATAD2A,GLA,GNL3L,GPR101,GRIPAP1,GRTP1,GSDMD…
hsa-miR-379	AADAC,ACSF2,ADAM30,ADAMTS15,ADIPOQ,ADORA2B,AGMO,AHRR,AKR1C3,ALG5,ALKBH3,ALPL,ANKRD29,ANUBL1,AP3S1,APBA3,ARAP3,ARF4,ARPC5L,ASB3,ATF7,ATP6V1B2,BCL7A,BOLA2,BOLA2B,BPIFB4,BRAT1,BTBD8,C10orf81,C12orf48,C12orf51,C16orf71,C16orf87,C19orf10,C19orf51,C1QTNF9B-AS1,C1orf55,C21orf49,C2orf53,C6orf132,C6orf225,C7,C7orf46,CACNG3,CALB2,CALD1,CALHM3,CAPN1,CASP7,CBWD1,CBWD5,CCDC56,CCDC83,CCKAR,CCNB2,CD226,CD9,CDH2…
hsa-miR-379_star	ADAT2,AGPAT4,ARHGAP28,ARHGAP6,ATP6V1H,BEND5,C12orf5,C19orf48,C1orf109,C1orf122,C9orf150,C9orf84,CACNA2D1,CBWD1,CCDC150,CCNYL1,CELF5,CHD6,CHTOP,CLCN5,COL8A1,CSPP1,CXADR,CXCL10,DACH2,DCTN6,DCUN1D5,DIRAS3,DOPEY2,DUSP10,EEA1,FAM21A,FAM21B,FAM69A,FAM9A,FAM9B,FAM9C,GDAP2,GEMIN5,GLRX3,GPR19,GTF3C6,H2AFJ,HELZ,HIGD2A,HIGD2B,HRSP12,HTATSF1,IL21,IRAK4,ITFG1,KATNAL2,KRCC1,LAPTM4A,MAGEB18,MAGED4,MAGED4B,MAGEE…
hsa-miR-380	AASDH,ABCC12,ABCC2,ACSM5,ACYP1,AFTPH,AK7,ALAS1,ALDH8A1,ANKUB1,ANXA1,AOC2,AP4B1,APOOL,AQP11,ARHGAP6,ARMC1,ARMC2,ASNSD1,ASZ1,ATAD5,ATF2,AUTS2,B3GNTL1,BCOR,BEND5,BOD1,BTNL8,C11orf54,C11orf71,C14orf102,C14orf105,C15orf61,C16orf91,C17orf57,C18orf8,C19orf39,C1D,C1orf129,C3,C7orf25,C8orf38,C8orf47,C9orf103,C9orf11,C9orf5,C9orf68,C9orf84,C9orf89,CAND1,CAPN12,CAPZA3,CBL,CCDC127,CCDC18,CCDC53,CCDC90B,CCL20…
hsa-miR-380_star	ACAT1,ADAM29,ADAMTS6,ADC,AKAP4,AMELY,ANP32B,AQP7,ARL5C,ASPH,ATG4D,ATP1B3,BACH2,BCL3,BPIFB4,C1QL3,C1orf162,C5orf56,C6orf99,CAGE1,CBLL1,CBWD1,CHIC2,CHRDL1,CORO7,CROCC,CXorf67,CYP4A11,CYP4A22,DALRD3,DEFB119,DHX29,DISC1,DNAJC1,DNAJC25,DPM2,DSG4,EFEMP1,EXOC3L4,FGF1,FGF18,GALNT12,GEMIN8,GMNN,GNAL,GPR115,GTPBP4,HAVCR1,HEATR5B,HNRNPM,HSPA1L,IFT43,IGLL1,INO80C,KDM6A,KLF12,KLRC1,KLRC2,KRT32,KRT76,LGALS8,LR…
hsa-miR-381	AAMP,ACP1,ACTG1,ADSSL1,AHSA1,AIMP2,AKAP9,ANKIB1,ANXA5,AQR,ART3,ASPHD2,ATAD5,ATG16L2,ATG3,ATP2A2,ATP5H,B3GNT5,B9D1,BCL6,BRIP1,BST1,C11orf58,C11orf88,C12orf24,C12orf63,C14orf2,C17orf59,C1QBP,C1orf177,C1orf63,C6orf204,C8orf42,CADPS2,CCDC34,CCL23,CCL7,CCNA2,CD19,CDCA3,CDH20,CENPC1,CEP152,CEP192,CETN2,CETN3,CHST11,CLDN14,CMTM7,CNST,COBRA1,COL11A1,COX8A,CPNE2,CPSF3L,CRABP1,CRY1,CSPG5,CTDP1,CTU2,CWC22,C…
hsa-miR-382	AADAT,ACER1,ACRV1,ACTA1,ADAMTS18,ADPRHL2,AGBL3,AKIRIN1,ANGPTL1,ANKHD1,ANKRD42,ANKRD5,APCDD1,APP,APRT,ARL13A,ASPM,ASZ1,ATAD5,BABAM1,BAZ1A,BCL2A1,BEST3,BLOC1S2,BMPR1B,BPIFB2,BRWD3,C18orf21,C1QTNF9B-AS1,C1orf174,C1orf186,C21orf62,C22orf31,C2orf43,C3orf27,C4orf29,C4orf37,C9orf4,C9orf46,CAPN12,CBLN1,CCDC148,CD37,CDA,CDC40,CDK13,CDK5RAP1,CENPI,CHGA,CHST9,CLDN14,CLK1,CLSPN,CLTC,CLTCL1,CNOT8,COLEC11,CPNE…
hsa-miR-383	AARSD1,ABCG4,ACOT11,ADA,ADORA3,ADSS,AGA,AIFM1,AKAP10,ALDH16A1,ALOX5,ALPK1,ANAPC5,ANKLE2,ANKRD42,ANXA5,AP3M1,APLNR,ARF6,ARHGAP25,ARHGAP33,ARHGDIB,AS3MT,ATP13A3,ATP6V1H,B4GALT7,BRI3,BRIX1,C10orf122,C11orf2,C12orf45,C12orf50,C14orf1,C17orf101,C17orf53,C17orf56,C1S,C1orf201,C1orf51,C1orf87,C20orf96,C21orf58,C2orf40,C2orf47,C2orf89,C9orf156,CA7,CACNG6,CAPS2,CASP3,CCDC132,CCDC24,CCDC62,CCDC84,CCDC92,CC…
hsa-miR-384	ACBD3,ADH1A,ADH4,AP4B1,APEX1,APOBEC3F,ARHGAP6,ARL14,ARPC5L,ASH2L,ATP2A2,ATP2C2,AUH,B3GNT7,B4GALT3,BCAN,BCDIN3D,BEST3,BMP2,BTG4,BTK,C11orf63,C14orf166,C18orf63,C19orf56,C1QC,C1orf56,C1orf74,C22orf28,C3orf39,C5orf56,C6orf105,C6orf118,C9orf103,CALCA,CANT1,CCDC115,CCDC117,CCDC39,CCDC75,CCL11,CCNDBP1,CCNT2,CD72,CHAF1B,CHD1L,CHODL,CIR1,CLPX,CMAHP,COL4A4,COPG,COQ2,CPOX,CRMP1,CSE1L,CTRC,CXCL11,CYB561D2,C…
hsa-miR-409-3p	AADACL4,ABI3BP,ACOT4,ACOX2,ACSL6,ACTR6,ADA,ADAM20,ADPRHL1,AFM,AKAP4,ANKAR,ANKRD58,AP3S1,APOA4,APOBEC2,APOL2,APRT,AQP7,ARHGAP32,ARHGAP33,ARPC3,ASCL3,ASPA,ATP13A5,ATP5B,ATP6V0A4,AXDND1,B4GALT2,BAI3,BIRC2,BMX,BNIP2,BOLA3,BST2,C10orf120,C11orf63,C11orf74,C11orf88,C12orf51,C12orf56,C12orf63,C13orf27,C14orf159,C16orf80,C1QTNF9B,C1orf63,C5orf25,C5orf4,C9orf68,C9orf84,CABP4,CADPS2,CARS2,CAV1,CCBL2,CCDC12…
hsa-miR-409-5p	ABCC3,ABCF2,ACTR1B,ACVR2B,AGFG2,AIRE,ALKBH5,ALPK2,ANKAR,AOAH,APLP1,APLP2,APOA1BP,APOH,APOOL,AQP10,AQP7,ARID3B,ARL6IP4,ART1,ASB10,ASPA,ATAD2,ATP5J,ATP6V1C2,ATXN2,B3GAT3,B3GNT7,BAI3,BMPR1B,BPGM,BRAP,BST2,C10orf116,C10orf120,C12orf35,C17orf101,C18orf10,C1QTNF9B,C1orf87,C3orf33,C3orf67,C5AR1,C5orf25,C6orf47,C8orf58,C9orf169,C9orf84,CAMK2D,CAPS2,CAPZA3,CAST,CBLL1,CCDC146,CCDC19,CCDC60,CCDC64B,CCDC71,C…
hsa-miR-410	AADACL2,ABCA10,ABHD13,ACTR10,ACYP2,ADH4,ADM,AGMO,AGPS,AGTPBP1,ALAS1,AMDHD1,ANAPC10,ANGPTL2,ANKFN1,ANKRD42,ARHGEF40,ASZ1,ATP6V0D2,ATP6V1H,AVIL,AXDND1,BCAR3,BLZF1,BMS1,BNIP3,BOD1L,BORA,C11orf87,C12orf24,C12orf26,C12orf5,C19orf63,C1orf109,C1orf131,C20orf20,C2orf43,C4orf41,C7orf10,C7orf11,C7orf46,C8orf76,CASK,CBX8,CCDC122,CD164L2,CD9,CHRNA1,CIRBP,CLCN5,CNKSR3,CNOT1,CNOT10,COL8A1,COL9A1,CPA6,CPSF6,CSD…
hsa-miR-411	ABI3BP,ACTR5,ADAM21,AGPAT9,AHRR,AHSG,ALDH1A1,ALKBH3,ARHGAP22,ARPC1A,ATG12,ATP2C2,ATP8B1,AUH,AVL9,BAG2,BANK1,BBS4,BCL2L14,BCL9,BMX,BNIP3,BTBD8,C10orf81,C11orf82,C14orf37,C16orf62,C16orf91,C1QL1,C2orf53,C3orf37,C6orf145,C6orf186,C7orf46,C8orf42,C8orf76,CACNA1B,CACNB4,CASP9,CBLB,CBS,CBWD1,CBWD3,CBWD5,CBWD6,CCDC18,CCDC71,CCDC91,CCKAR,CDC37,CDH2,CDY2A,CENPV,CHRNA1,CIB4,CKAP5,CKS2,CLIP4,CLNK,CLNS1A,CNP…
hsa-miR-411_star	ABCA10,ADH4,AGPAT4,ARHGAP28,ARHGAP6,ATP6V1H,BAG3,BPY2,C12orf5,C1orf122,C1orf182,C20orf7,C9orf11,C9orf150,C9orf95,CACNA2D1,CCDC150,CELF5,CHRAC1,CSPP1,CXADR,DCTN3,DCUN1D5,DMAP1,DNTT,DUSP10,ERAS,FABP4,FAM21A,FAM21B,FAM9C,FPGT-TNNI3K,GDAP2,GLRX3,GTF3C6,GTPBP3,HELZ,HIGD2A,HIGD2B,HTATSF1,IL21,IL24,INPP5K,ITFG1,JHDM1D,JMJD1C,KDM2B,MAGEB18,MAGED4,MAGED4B,MAGEE1,MAN1B1,MGAT4A,MIER1,MMS19,MTX2,MYL12B,NAA35…
hsa-miR-412	A4GALT,ABHD12,ABHD3,ACTB,ADAD2,ADCYAP1R1,AGPAT3,ALDH1L1,ALKBH5,ANKIB1,ANKZF1,ARF5,ARFRP1,ARHGAP9,ARL6IP4,ART1,ATP5EP2,B4GALT7,BLNK,BNIP1,BTBD17,C10orf125,C12orf34,C16orf74,C17orf108,C19orf28,C19orf80,C1QC,C1orf123,C1orf127,C1orf35,C20orf96,C21orf2,C3orf37,C6orf126,C6orf136,C7orf43,C7orf45,C9orf11,CALB2,CALCA,CALHM3,CCDC107,CCDC134,CCDC61,CCHCR1,CCR10,CCT8,CDH20,CDH23,CHRNA2,CHST10,CLTB,CNOT10,CRE…
hsa-miR-421	AARS,ABCA6,ACSBG2,ACSM3,ALOX5,ANKRD10,ARID4B,ARIH2,ARX,ATF3,ATP8B3,BACE2,BAI3,BTBD11,C11orf82,C11orf87,C14orf135,C16orf52,C16orf74,C16orf92,C19orf21,C19orf77,C1orf55,C2orf42,C5orf63,C7orf11,C9orf156,CACNA1B,CALCB,CAPZA1,CASP2,CAST,CCDC134,CCDC135,CCDC58,CCNE1,CD5L,CDKL3,CENPM,CHADL,CHI3L2,CHSY3,CIR1,CLN6,CLP1,CLTA,CNIH4,CNTF,COA5,COMMD1,CPNE2,CPS1,CPT1A,CRCT1,CSGALNACT1,CXorf48,CXorf67,CYP46A1,DC…
hsa-miR-422a	ABCC9,ACO2,ADD2,ADHFE1,ADPRH,ADSL,AFF4,AHSA1,ALMS1,ALOX5,ALOXE3,ANGPT4,ANKRD6,ANPEP,AP4B1,APOBEC2,APOC2,AQP11,AQP8,ASPG,ATP13A3,ATP2C1,ATP4A,ATP5J,BYSL,C15orf33,C17orf74,C17orf80,C17orf90,C19orf25,C19orf28,C19orf51,C1orf192,C20orf173,C6orf221,C9orf23,CAB39,CACNB4,CADM4,CAMK1G,CAMSAP3,CBLB,CBS,CCDC102A,CCDC17,CCDC42,CCDC58,CCDC70,CCL17,CD180,CD300LG,CD97,CDA,CECR2,CELA1,CENPB,CER1,CHD8,CHERP,CHIT1…
hsa-miR-423-3p	ABCB8,ABCC11,ABCD4,ABHD12,ABL1,ACE,ACHE,ADAM11,ADAT3,ADI1,ADM,ADRA1B,AFAP1,AMICA1,ANKRD24,AP2A1,APBA3,APLP1,APOC2,AQP8,ARAF,ARHGDIB,ASB1,ATAD3B,ATP13A1,ATP5D,ATP5J2,ATXN2,AZGP1,B3GAT3,BAI1,BAI2,BAP1,BCL2L12,BHLHE40,BPIFB2,BYSL,BZRAP1,C10orf28,C11orf31,C11orf84,C11orf95,C15orf62,C16orf42,C17orf70,C19orf10,C19orf39,C19orf53,C19orf71,C1QTNF4,C1orf159,C20orf151,C20orf201,C20orf46,C22orf28,C6orf145,C9…
hsa-miR-423-5p	AANAT,ABCB9,ABCC12,ABHD12,ACAP3,ACCN4,ACHE,ACRBP,ADAMTSL1,ADCK1,ADCK3,ADRA1B,AGAP3,AKAP1,ALDH1L1,ALKBH6,ANKRD2,ANP32A,AP1M1,APBB1,APBB3,ARHGAP27,ARHGAP4,ARHGDIB,ARHGEF1,ARHGEF16,ARHGEF4,ARL5C,ART1,ASB1,ASB16,ASB2,ATAD3B,ATG4D,ATN1,ATP5B,ATP5D,ATP5J2,ATP5S,ATP6V1F,AZGP1,B3GAT3,B4GALNT4,B4GALT3,BAI2,BAIAP2,BAP1,BCAP31,BIRC7,C10orf125,C11orf85,C12orf44,C14orf102,C19orf28,C19orf53,C1QTNF6,C1orf159,C1…
hsa-miR-424	A4GNT,AARS,ABCF2,ACAD9,ACOX3,ACP2,ACSBG2,ACSS2,ADAMTSL1,ADRB2,AKAP12,ALG12,AMIGO2,ANKRD13D,AP2A1,AP3S1,APOD,APTX,AQP11,ARID5A,ARMCX2,ARPP21,ASB1,ATN1,ATP13A2,ATP4B,AURKAIP1,AVEN,AVL9,AXIN2,B3GAT3,B3GNT4,BAI1,BBS2,BCAP31,BEST1,BEST4,BFAR,BPIFA1,BPIFB4,BRI3,BSND,BSPRY,BTAF1,BTN1A1,C10orf68,C11orf24,C11orf42,C11orf53,C17orf59,C17orf75,C18orf8,C1QB,C20orf46,C20orf72,C20orf96,C2orf42,C4orf26,C6orf57,C…
hsa-miR-424_star	ADAM7,ADCK2,AICDA,ALOX5AP,C10orf107,C14orf177,C5orf35,CACNG6,CBWD5,CCL2,CDK11A,CENPC1,CHCHD3,COL13A1,COL15A1,DFNA5,DPH1,EIF1B,ENKUR,FAIM,FAM59A,FHL2,GPBP1,GPR65,GTPBP8,HIF3A,HIST2H2AA3,HIST2H2AA4,IDH2,KIF27,KISS1R,LAGE3,LIPA,MRPS26,NMI,NR4A1,PDC,PEX2,PLAGL1,PMS2,PPIAP22,PRKAG2,RAB39,RBMXL2,RHOXF2,RHOXF2B,ROCK2,RPL3L,RPRD2,SHPRH,SLC26A5,SMC2,SMPX,SPIB,SPIN3,TBC1D3,TBC1D3C,TBC1D3F,TBC1D3G,TCEAL2,TH…
hsa-miR-425	AACS,ACACB,ACCN1,ACP5,ACTR3,ADAMTS2,ADAMTS6,ADH5,ADRA1B,AGFG2,AGPAT9,AGTPBP1,AIMP2,ALDOA,AMHR2,AMPH,ANKRD46,AP4B1,AQP3,ATP2A1,ATP5G3,ATP5S,B4GALT4,BANP,BCAS2,BCOR,BPIFB6,BRAP,BRS3,BST2,BTG3,BTK,BTNL8,BYSL,C10orf35,C12orf24,C12orf5,C12orf63,C17orf58,C17orf79,C19orf59,C20orf43,C2orf47,C3orf19,C3orf39,C3orf64,C4orf19,C6orf130,C6orf186,C7orf11,C8orf47,C9orf169,C9orf40,CAMLG,CCDC127,CCDC141,CCL25,CCT2…
hsa-miR-425_star	ADCY3,AFG3L2,ANKS1B,ATP8A2,BAIAP2,BIN1,C12orf57,C15orf44,C17orf62,C19orf33,C19orf6,C1orf85,C7orf50,CACNA1G,CAPZB,CARHSP1,CCDC106,CCDC60,CD160,CD84,CDA,CDH4,CDK11A,CEACAM20,CENPB,CSAG1,CST9,DHCR7,DNAJC4,DPP8,EDDM3B,EIF3C,EIF3CL,EPHX1,EXOC3L1,EXOSC1,FAM100B,FANCE,FLYWCH1,FMO1,FOXD4,GABRB1,GDF15,GEMIN7,GIF,GLI1,GPI,GPRASP1,GTF2IRD1,HIST1H2BB,HTR3C,IFITM5,IL28RA,JMY,KCNAB2,KRT20,LAMA5,LDLRAD1,LENG8,L…
hsa-miR-429	ABCC9,ABHD3,ABI2,ACOT7,ACP5,ACTC1,ACTR6,ADAMTS20,ADHFE1,AIG1,ALG13,ALS2CR8,ANK3,ANKRD22,ANLN,ANP32B,AP3S1,APBB2,APOC3,APOH,APOO,ARG1,ARHGAP19,ARHGEF3,ARIH1,ARIH2,ART5,ASB4,ASF1A,ATIC,ATP13A3,ATP2A2,ATP2C1,ATP5B,ATP5S,BAG2,BAG6,BCL2L10,BLZF1,BRMS1L,C11orf61,C11orf73,C11orf95,C12orf24,C14orf37,C14orf39,C14orf49,C15orf17,C16orf74,C17orf57,C17orf75,C18orf19,C18orf55,C1orf63,C20orf29,C2orf42,C3orf23,C…
hsa-miR-431	ABHD11,ACAA1,AIRE,ALPK1,AMBP,ANKS3,ARHGAP10,ARRDC5,ATG16L2,ATOH8,ATP1A1,ATP6V0E1,AUP1,BCAN,BCKDK,BFAR,BMPR1B,BRD2,BRE,BRSK2,C10orf62,C11orf54,C11orf63,C11orf83,C14orf102,C16orf42,C19orf28,C19orf53,C19orf54,C1orf43,C1orf94,CALCR,CAPN12,CAPS,CBLN4,CCDC111,CCDC59,CCK,CCL2,CCL27,CD101,CDC42EP1,CEP72,CEP89,CERS5,CLNK,CLTC,CPNE7,CRHR2,CRISP2,CSNK1G2,CSRP2BP,CST7,CYB561D2,DFNB31,DHRS3,DISC1,DOK3,DPCD,DU…
hsa-miR-431_star	ABCB9,ADIPOQ,AGPAT2,AIRE,ANGPT4,ANKMY1,ANP32B,APOBEC3H,ARHGEF2,ARMCX5,ASPHD1,ATG16L2,ATRIP,C10orf71,C16orf61,C17orf81,C1orf110,C20orf151,C8G,CAPZB,CCBL2,CCL17,CCL4L1,CDC45,CELA1,CEP57L1,CHD5,CHI3L2,CLOCK,COMT,COPS4,COX8A,DERL3,DISC1,DLX2,DLX5,DUOXA2,DYNLRB2,EFEMP2,ELN,EMD,ENTPD1,EXOC6B,F3,FAM83B,FARSA,FCGBP,FLAD1,FOXS1,GC,GK,GMPPA,GPSM1,GPX4,GRM1,HES5,HEXDC,HYI,IFT122,IL20RB,INCENP,INTS1,IPPK,KCN…
hsa-miR-432	ABCF2,ABCF3,ABTB1,ACO2,ADA,ADAM7,ADAMTS13,ADORA2B,ALKBH3,ALOX5,ALPL,ALX3,ANXA9,ARHGAP25,ARHGAP6,ARSK,ASB2,ASH2L,ASTE1,AXL,BAIAP3,BNIP1,BPI,BPIFA1,BPIFB3,BRF1,C12orf53,C14orf70,C16orf78,C19orf44,C19orf51,C19orf57,C1QA,C1QBP,C1QC,C1orf146,C1orf74,C1orf85,C20orf26,C20orf62,C2orf85,C3orf14,C3orf18,C3orf20,C6orf146,C6orf72,C7orf58,C9orf16,C9orf37,CA3,CALCB,CALM2,CARKD,CASQ1,CBWD1,CCDC102A,CD19,CD48,CD…
hsa-miR-432_star	ABCA1,ABCF3,AIRE,ANGPTL4,ANKAR,ANKRD33,ATP2B2,BIK,BLNK,C1orf194,C2orf53,C9orf116,CCL17,CD27,COL11A1,CXXC1,DENND5B,DGAT2L6,DYNLL1,EIF3C,EIF3CL,FAM22D,FAM63A,FBXO38,FNDC8,GABBR1,GBGT1,GLIS1,HDAC8,HDDC3,HOXD10,HSD17B10,IDH3G,IGLL1,IL36B,KRT81,LCN1,LTF,LYNX1,MND1,MRAS,MYL2,NAT6,NLRC3,NOXO1,NUDT5,OPRD1,OSGIN1,PABPC1L,PCF11,PDE4DIP,PHF8,PHLPP2,PI3,PIGQ,PISD,PLCB1,PLEKHA2,PLEKHG3,PLEKHN1,POLR2L,PRICKLE3…
hsa-miR-433	AADAT,AARS2,ACAD8,ACOX2,ACP6,ACTRT1,ADH5,AHRR,AKIRIN2,AMIGO3,ANKRD44,ANO10,ARPC1A,ASPM,ATG4A,ATP1A4,ATP5S,B3GNT6,BCO2,BEST3,C10orf99,C12orf48,C15orf58,C16orf95,C18orf55,C19orf52,C1QL3,C1S,C1orf50,C20orf54,C20orf94,C22orf28,C6orf58,C6orf72,C6orf94,C8orf76,C9orf169,C9orf46,C9orf68,CACNA2D3,CAMKMT,CARS,CCDC120,CCDC121,CCDC138,CCDC142,CCL20,CD1B,CDC27,CDH4,CDK5RAP1,CDY1,CEACAM6,CENPL,CFTR,CHD2,CIRH1A…
hsa-miR-448	ACER2,ACOT12,ACOX2,ACTL7A,ADAM2,ADD1,AGR3,ALDH8A1,AMBN,AMY2B,ANKRD37,ANO8,AOX1,ARHGEF40,ASB10,ATAD5,AUTS2,AVPR1A,BRP44L,C10orf122,C14orf102,C14orf37,C19orf59,C1GALT1C1,C5orf34,C7orf55,C8orf34,C9orf40,CAGE1,CATSPERB,CCDC12,CCDC53,CCL11,CCR8,CENPQ,CERS5,CFD,CKAP2,CNGA1,CNTN5,COPB2,CTNND1,CTTN,CUL4B,CXorf22,CXorf41,CYP17A1,DACT1,DARS,DBC1,DDOST,DDX53,DENND5B,DEPDC7,DFNA5,DHX58,DIP2B,DIS3L,DLAT,DLL4,…
hsa-miR-449a	AARS,ABCA2,ABCD1,ABCF3,ACAA2,ACCN1,ADAMTS4,ADCK1,ADRA1D,AIP,AKIP1,AKR1A1,AKT1,ALG13,ANAPC2,ANO7,ANXA5,AP1G2,AP2S1,AQP8,ARHGDIB,ARID5A,ARPC1B,ARSJ,ASPHD1,ATG2A,ATOH1,ATP13A1,ATP13A4,ATP5SL,ATRIP,B3GAT3,BAG3,BAX,BCAN,BCKDK,BPIFB4,BRAT1,BRI3,BTBD11,BTG4,C10orf128,C12orf57,C14orf166B,C17orf58,C19orf29,C1GALT1,C1orf189,C1orf68,C20orf7,C22orf23,C22orf25,C22orf28,C2orf61,C6orf125,C6orf145,C8G,CA7,CAPZB,…
hsa-miR-449b	ABCA2,ABCC3,ABCD1,ABCF3,ACAA2,ACSL1,ADCK1,ADRA1D,AIP,AKIP1,AKR1A1,AKT1,ANAPC2,ANO7,ANXA5,AP1G2,AP2S1,APBA1,APLNR,AQP8,ARID5A,ARPC1B,ARSJ,ASPHD1,ATG2A,ATIC,ATOH1,ATP13A1,ATP13A4,ATP5SL,ATRIP,ATXN7L3,B3GAT3,B4GALT2,BAG3,BAX,BCAN,BCKDK,BEST1,BEX4,BLMH,BPIFB4,BRAT1,BRI3,BTG1,BTG4,C10orf128,C12orf57,C13orf33,C14orf166B,C17orf58,C19orf29,C1orf189,C1orf68,C20orf7,C22orf23,C22orf25,C22orf28,C2orf61,C6orf…
hsa-miR-450a	AADAT,ABCA6,ABCC6,ACCN1,ACOT12,ACOT13,ACSS3,ACVR1,ADAM7,ADAMTS12,AFM,AGPAT4,AHNAK,AHRR,AMT,ANKHD1,ANKRD18A,ANKS6,ANXA13,AOC2,APOO,APOOL,ARHGAP10,ARL9,ARPC2,ART3,ATP5C1,ATP6V1H,ATP7B,ATP8A2,AVIL,AXDND1,BARX2,BBOX1,BEX2,BLNK,BLZF1,BPI,BRF2,BRI3,BTNL2,C11orf31,C11orf54,C12orf11,C17orf39,C19orf75,C1orf100,C1orf110,C1orf174,C1orf182,C1orf63,C20orf85,C21orf63,C22orf28,C3orf55,C3orf58,C5AR1,C6orf221,C8B…
hsa-miR-450b-3p	AANAT,ABCC3,ABCD3,ADAL,ADAMTSL1,ADSSL1,AGXT2L1,AMT,ANKHD1,ANKRD1,ANKRD18A,APOBEC1,AQP5,ARHGAP10,ARHGAP22,ARMC6,ASB2,ASNA1,ATP5D,ATP5E,ATP5EP2,AZGP1,BABAM1,BBOX1,BBX,BCAS4,BLZF1,BOC,BRPF3,BTBD6,BTBD8,C10orf71,C11orf54,C11orf71,C13orf15,C14orf80,C17orf39,C19orf18,C19orf21,C19orf75,C1orf123,C1orf131,C21orf63,C5,C5orf56,C6orf164,C9orf117,C9orf128,C9orf156,C9orf3,CALCOCO1,CALHM2,CALR,CARD11,CCDC122,CC…
hsa-miR-450b-5p	AADAT,ABCA6,ABCC6,ACOT12,ACSS3,ADAD1,AFM,AGA,AGXT2L1,AHRR,AMT,ANKRD1,ANKRD18A,ANKRD31,ANKS6,ANXA13,AOAH,AOC2,APOOL,ARPC2,ART3,ATP5C1,ATP6V1H,AVIL,AXDND1,BARX2,BBOX1,BCL2A1,BEX2,BLZF1,BPI,BRF2,BRI3,BRIX1,BTBD8,BTNL2,C10orf112,C10orf71,C11orf31,C11orf54,C12orf11,C1orf100,C1orf110,C1orf174,C1orf63,C20orf85,C22orf28,C2orf76,C3orf58,C5AR1,C6orf1,C6orf221,C8orf37,C8orf80,C8orf84,C9orf129,C9orf153,C9orf…
hsa-miR-451	ABCB1,ABCG5,ACAA1,ACTL6B,ACTR10,ACTR3B,ACVR2B,ACYP1,ADCK4,AEBP2,AGFG2,AKR1B1,AKTIP,ALDH9A1,ALG6,ALMS1,ALS2CR12,ANKRD27,APBA3,APIP,ARAP3,ARHGEF3,ARID1B,ARIH2,ARMCX1,ARPC1B,AS3MT,ASCC1,ASXL1,ATF2,ATF7IP2,ATL2,ATP10A,ATP6V1G1,ATXN2,ATXN3L,AUTS2,BATF,BAZ2B,BRP44L,BTAF1,BTNL8,BUB1B,C11orf30,C11orf54,C12orf34,C12orf44,C12orf5,C12orf62,C14orf135,C16orf89,C17orf104,C17orf42,C1orf222,C1orf31,C1orf43,C2,C2…
hsa-miR-452	ABCC9,ACAA1,ACAA2,ADORA2B,AIMP1,ALG6,ALKBH3,ALMS1,AMY1A,AMY1B,ANGPTL5,ANKRD46,ANP32B,APBA3,ARL1,ATIC,ATP5B,ATP5F1,ATP5S,ATP6AP1L,BAMBI,BBOX1,BET3L,BZW1,C10orf93,C11orf49,C12orf5,C14orf149,C14orf93,C16orf87,C20orf111,C3orf70,C6orf146,C8orf34,C9orf9,CASC1,CCBL2,CCDC23,CCDC42,CCDC61,CCDC64,CCDC84,CCDC90B,CCKAR,CCL23,CCL3L3,CCNO,CD1E,CDR2,CENPC1,CHEK1,CHN1,CKS2,CLDN10,CLK1,CLMN,CNTRL,COPS4,COX4NB,COX…
hsa-miR-452_star	ANKHD1,APBB3,ATIC,ATP13A2,ATP2A2,BAG2,BTNL8,C19orf69,C1QTNF9,C1QTNF9B,CAGE1,CD99,CDH23,CEBPB,CEP192,CKS1B,CLOCK,CXorf40B,CYP2E1,DNAJC2,DONSON,DUSP12,EIF3D,FAM160A2,FAM96A,FCER2,FGR,FXC1,GDF11,GPR12,GPR45,HOMER2,HSD11B1L,HSPB3,IFNA10,IFNA14,IFNA16,IFNA21,IFNA5,IFNA8,IGFBPL1,IK,IMP3,KIF9,LGSN,LRRC47,MAST2,MBD6,MLH3,MYLK4,NCOR1,NF1,NKAIN3,NTHL1,P2RX4,PIGC,PMAIP1,POM121B,PRRC2C,PXK,RNMT,SERPINB2,SIRT…
hsa-miR-453	ABCF3,ABHD14A,ACAT1,ADAM33,ADCY10,ADM,AKIRIN2,ALOX15B,ANGPT4,ANKRD58,ANO10,ANXA9,ARHGAP12,ARHGAP25,ARHGDIA,ARHGEF40,ARPC2,ART1,ATP4B,ATPAF2,B3GNT6,B3GNT8,B4GALT7,BARHL1,BARHL2,BLK,C10orf93,C11orf31,C17orf53,C1QL2,C1orf177,C20orf123,C5orf46,CACNA2D3,CACNG1,CALHM2,CAMK1,CCDC60,CD101,CD22,CDC20B,CDC42BPB,CDH23,CDK4,CDKL3,CENPL,CEP78,CHMP2A,CIDEB,CIITA,CLRN3,CNKSR3,COMP,CPA1,CPNE1,CPNE9,CSAG2,CSAG3,C…
hsa-miR-454	AADAC,ABCB7,ABHD12B,ABHD3,ACAT2,ACTR10,ACVR1,ADAM28,ADAMTS20,AFG3L2,AIMP2,AKR1D1,AKTIP,ALDH3A2,ALG13,ALS2CR12,AMN1,ANKIB1,ANKRD56,ANXA10,APCDD1,ARAP2,ARHGEF1,ARIH2,ART5,ARX,ASTE1,ATAD3B,ATG4D,ATP12A,ATP6V0A4,ATP6V0E1,AVEN,B2M,BAI3,BARHL2,BBS2,BEX5,BTD,BTG1,BUB1B,C10orf68,C11orf82,C12orf11,C12orf44,C14orf109,C14orf37,C15orf24,C15orf61,C18orf55,C18orf8,C19orf48,C22orf15,C2orf28,C5,C5orf30,C6orf211,…
hsa-miR-454_star	ACCN4,AFF4,AGFG2,ALDH9A1,ASGR1,ASNS,B3GNT8,C12orf44,C6orf47,CCL24,CD72,CHRDL1,CLDN8,COL17A1,COL6A5,CTNNB1,CYorf17,DRD4,DTWD1,DYRK1B,EIF4A2,EPSTI1,FANCE,FGFBP2,GDF11,GDF9,GJA9,GNG11,GREB1,HBG2,HMX2,IL34,ITGA11,MAMSTR,METTL11B,NPM1,OR51B6,PCID2,PCYT1B,PDILT,PFKM,PPID,RAD54L,RBM14,RIMKLBP1,RNPEPL1,RPL27A,SOBP,SPAG9,SSC5D,STOML2,TCAP,TFG,TRIM40,TRIM50,TRIM6,TSPO2,VPS25,ZBTB47,ZNF821
hsa-miR-455-3p	ABCC2,ABCF3,ABHD14B,ABL1,ACAD8,ACP2,ACSL6,ACVR2B,ADAMTS18,ADAMTS8,ADAT1,ADCK1,ADCK5,ADIPOR1,ADORA2B,AGPAT9,AHRR,AIF1L,AKAP12,ALS2CR8,AMIGO2,ANAPC11,ANAPC5,ANKRD22,ANKRD46,ANKS4B,AP2A1,AP3D1,APOA1BP,ARHGAP25,ARHGAP33,ARHGEF10L,ARL6IP4,ASCC3,ASPHD1,ATAD5,ATG16L2,ATP1A4,AVPI1,AZIN1,B2M,BAG3,BAI2,BAX,BEND7,BIRC7,BLZF1,BMS1,BOLA1,BRSK2,BUD13,C10orf128,C10orf129,C11orf9,C12orf11,C12orf5,C14orf149,C15or…
hsa-miR-455-5p	AAGAB,ACBD7,ACER3,ACOT12,ACOX2,ACSF2,ACTN1,ACY3,ADAM22,ADARB2,ADAT3,AFF4,AGR3,AKT3,ALG13,ANAPC11,ANKZF1,ANXA13,AOC2,ARHGEF10L,ARMC6,ASCC3,ATP11C,ATP5E,ATP5EP2,ATP8B4,AVPI1,B3GALT5,B3GNT2,B9D2,BATF,BAZ2B,BBOX1,BCDIN3D,BFAR,BPIFB6,BRD1,BST2,C10orf35,C12orf11,C12orf63,C14orf37,C15orf40,C15orf44,C15orf59,C17orf39,C19orf21,C19orf59,C19orf68,C1GALT1C1,C20orf195,C20orf4,C20orf43,C22orf25,C22orf28,C22orf…
hsa-miR-456	ABCB9,ACPP,ADAD2,ADAMTSL5,ADORA2B,AFMID,AGXT,ALKBH3,ALX1,ANKFN1,ANKRD2,APCDD1,APLP1,ARL4D,ARL6IP4,ASPSCR1,ATG2A,ATP1A4,ATP5D,AVL9,AVPR2,BCKDK,BCL2A1,BEX1,BIN1,BOD1,C11orf2,C15orf40,C16orf74,C16orf79,C19orf51,C19orf56,C1QC,C1QL1,C1S,C1orf111,C1orf122,C1orf228,C1orf35,C1orf85,C20orf151,C20orf43,C21orf2,C22orf36,C8G,C8orf55,CA6,CACNG1,CAMK1D,CAMK2N2,CCDC135,CCDC22,CCDC60,CCDC94,CCHCR1,CD19,CD72,CDA,…
hsa-miR-460	ABCC9,ABCG5,ACOT12,ACOX3,ACPP,ALOX5AP,ANKIB1,ANKUB1,ANO2,ANXA3,APCDD1,APH1A,APOOL,APTX,AQP5,ARFGAP2,ARMC4,ASB10,ATP12A,ATP5A1,ATP6V0E1,BCAS4,BCL2L11,BET3L,BLZF1,BTN1A1,C10orf107,C11orf10,C12orf63,C14orf105,C16orf46,C19orf43,C19orf53,C1orf122,C20orf195,C6orf47,C8B,CA14,CACHD1,CACNG7,CATSPER2,CBR1,CCDC110,CCDC150,CCDC18,CCDC66,CCNO,CD97,CDCA3,CENPK,CEP72,CGRRF1,CHN2,CHODL,CIB1,CKAP2,CLPTM1,CLPX,COG…
hsa-miR-483-3p	AAMP,ABTB1,ACAA1,ACAD8,ACBD4,ADAD2,AGFG2,AHDC1,AIF1,AKAP17A,AKR7A2,AKT2,AMDHD2,AMIGO3,AMZ2,ANKHD1,ANKRD33,ANKS3,ANKZF1,APBA2,APEH,APP,AQP7,ARL2,ARPC1B,ARRB2,ASB2,ASCC3,ASL,ATG7,ATP8B2,ATXN7,B3GNT8,BARHL1,BAX,BCAN,BCAR1,BCL6B,BCORL1,BDKRB2,BHLHA15,BIK,BMP8A,BPGM,BRCA2,BRSK1,C10orf85,C10orf93,C11orf91,C12orf10,C12orf52,C14orf166B,C16orf48,C17orf65,C19orf48,C19orf71,C19orf80,C1orf177,C1orf85,C3orf25…
hsa-miR-483-5p	AANAT,ACBD6,ACHE,ACO2,ACRV1,ACSF2,ACTL6B,ADRBK1,ADSL,AFG3L2,AGBL1,AHSG,AIF1,AKAP17A,AKAP3,AKT2,ALDOC,AMICA1,ANKS1B,APLNR,APOA4,AQP7,ARHGAP32,ARHGDIB,ARMC4,ARR3,ATP1A3,ATP1B2,ATP6V0E1,ATPAF2,B4GALT3,BACE2,BARX2,BCAM,BCAP31,BCORL1,BMP8A,BNIP1,BNIPL,BRSK2,BTBD2,C10orf85,C11orf84,C12orf52,C16orf47,C16orf61,C17orf65,C17orf79,C17orf81,C19orf52,C19orf56,C1QL1,C1QL4,C1orf85,C20orf151,C22orf32,C6orf136,C9…
hsa-miR-484	A4GALT,ABHD8,ABTB1,ACAD10,ADAD2,ADORA1,AGFG2,AGPAT2,AGXT2L2,AMICA1,APBA3,APLN,APOM,ARFRP1,ARHGEF10L,ARMC6,ARSA,ARSI,ASB2,ATP7B,AVL9,BATF,BCAR1,BIN3,BMP1,BOK,BSCL2,C10orf91,C11orf24,C11orf84,C16orf42,C16orf53,C17orf53,C19orf18,C19orf20,C19orf28,C20orf54,C2CD2L,C2orf70,C6orf145,C8orf55,CABP1,CACNA1C,CACNA1D,CALML5,CAPN1,CASKIN2,CCDC142,CCDC42,CCDC53,CCDC60,CCDC77,CCDC9,CCKBR,CCL18,CCL26,CCL3,CCL3L3…
hsa-miR-485-3p	AAMP,ABCB9,ABHD2,ABTB1,ACADS,ACOT12,ACTR6,ACYP1,ADCK5,AFAP1,AGAP3,AGBL1,AGBL2,AGBL4,AKIP1,AKR1C4,ALDH18A1,ALDH6A1,ALG14,ALKBH6,ALX1,ANGPTL4,ANKDD1A,ANKRD37,ANO9,AP2S1,APBA3,AQR,ARFGAP3,ARHGAP21,ARHGAP22,ARHGAP25,ARHGEF1,ARMC6,ARVCF,ASCC3,ASXL1,ATP6V1G3,AVPR2,B9D1,BABAM1,BCAN,C10orf35,C14orf1,C14orf102,C14orf118,C15orf24,C16orf53,C17orf56,C18orf55,C19orf44,C19orf59,C1QBP,C1orf101,C1orf177,C1orf50,…
hsa-miR-485-5p	AAMP,ABCB9,ACSBG2,ADAD2,ADCK4,ADCYAP1R1,AFAP1,AFG3L2,AGBL5,AGT,AKIP1,AKR1C4,ALOX5,ALPL,ALX1,AMIGO2,ANKRD2,APOBEC2,ARHGEF1,ARID3A,ART1,ARVCF,ASGR2,ATOH8,ATPAF2,AURKAIP1,BARHL1,BARHL2,BEX2,BIN3,BNIP1,BPIFA2,BPIFB3,C12orf44,C14orf102,C14orf80,C15orf62,C16orf42,C17orf39,C19orf29,C1orf85,C20orf132,C20orf43,C2orf85,C8G,C9orf4,CA14,CABP2,CACNA1H,CACNG1,CAPN1,CCDC136,CCDC22,CCDC94,CCL21,CCL23,CCNDBP1,CD1…
hsa-miR-486-3p	AAMP,AANAT,AATF,AATK,ABCB8,ABCF3,ABHD16B,ABI3,ACADS,ACADVL,ADC,AEBP1,AGXT,AHRR,AK8,AKIRIN2,ALDOC,ALKBH6,AMH,AMTN,ANGPT4,ANGPTL6,ANKS3,AP1S1,AP2A1,APLNR,APOA4,AQP8,ARHGAP35,ARHGAP4,ARMC6,ARPC1B,ATN1,ATP13A1,ATP5D,B4GALT7,BCL6B,BHLHE40,BIRC7,BPIFA1,BPIFB2,BPIFB3,BRSK1,BTBD9,C11orf2,C14orf80,C15orf39,C16orf42,C17orf46,C17orf53,C17orf56,C19orf59,C1QA,C1orf127,C1orf49,C1orf68,C1orf85,C2,C21orf67,C3orf…
hsa-miR-486-5p	AATK,ABTB2,ACAA1,ACLY,ACPP,ACTN2,ADC,ADHFE1,ALKBH2,ANGPTL4,ANGPTL7,ANK1,ANPEP,ANXA13,APBB1IP,ARHGAP35,ARHGAP4,ARIH1,ARMC6,ASB4,ASCL3,ATIC,ATP2C2,ATP5D,ATP6V0B,ATP9B,B9D2,BCAS2,BEND5,BRF1,BRSK1,BTAF1,BTBD6,C10orf137,C10orf93,C11orf9,C12orf45,C14orf159,C14orf80,C16orf58,C17orf39,C17orf53,C19orf6,C19orf80,C1QL4,C1orf100,C1orf127,C1orf68,C21orf67,C2orf42,C2orf72,C2orf89,C3orf45,C7orf50,C9orf86,CACNA1…
hsa-miR-487a	AARSD1,ABHD16B,ACTR8,ACYP1,ADAM2,ADAM23,AFTPH,AGAP3,AIFM1,AKIP1,ALDH1A1,ALG14,ANO9,AP1AR,AP2S1,APBA3,ARHGAP29,ASCC3,ASPN,ATRNL1,AZIN1,B3GALNT2,BABAM1,BOD1L,BRF2,C10orf35,C13orf26,C15orf24,C15orf58,C16orf52,C16orf59,C17orf62,C19orf69,C1orf35,C1orf49,C20orf165,C22orf32,C3orf39,C3orf67,C5orf41,CACNA1C,CALB2,CAMSAP1,CARTPT,CCAR1,CCDC150,CCK,CCNT2,CCR2,CDH15,CENPV,CEP192,CETN3,CFTR,CGRRF1,CHKA,CHORDC1…
hsa-miR-487b	ABHD16B,ACTR8,ACYP1,AFTPH,AIFM1,AKIP1,ALDH1A1,ALDH1A3,ALG14,ANKRD9,ANP32E,ANXA1,AP1AR,APBA3,ARGLU1,ASCC3,ATP9A,ATRNL1,B3GALNT2,BABAM1,C16orf52,C19orf69,C1QL3,C1orf131,C1orf35,C1orf49,C20orf165,C22orf32,C3orf67,C4orf29,C4orf32,C6orf195,CACNA1C,CALB2,CAMSAP1,CARTPT,CC2D2A,CCAR1,CCK,CCNO,CDKN2AIP,CENPV,CEP192,CFTR,CGA,CGRRF1,CHAMP1,CHMP4B,CHRNA2,CLGN,CLIP1,CMAHP,CMAS,CNOT4,CNPPD1,CNTNAP4,CNTRL,COL9A…
hsa-miR-488	A3GALT2P,AEBP2,AFP,AKR1B1,ALDH2,ANGPTL7,ANKRD44,AOAH,AQR,ARFIP2,ARMC4,ARMCX1,ATF1,ATIC,ATP6V0B,B3GNT3,BNIP1,C10orf12,C11orf82,C17orf47,C17orf80,C19orf10,C19orf80,C1orf135,C1orf168,C20orf187,C3orf25,C3orf30,C4orf17,C5orf42,C5orf63,C7orf26,C8orf84,C9orf43,C9orf57,CAMLG,CBX8,CCDC146,CCDC147,CCDC65,CCNG1,CD300LG,CD3D,CDKL4,CDY1B,CES5A,CGA,CHAF1B,CNOT1,COMMD3,COPB1,COQ5,CPA3,CRHBP,CSMD1,CSNK2B,CSPP1,C…
hsa-miR-488_star	ABHD16B,ACOT6,ACVRL1,ADAM2,ADAT2,ANXA9,APBB1IP,APOA1BP,ARMCX2,ARSA,ATP6V0A4,BBX,BCDIN3D,BFSP1,BIN3,BLNK,BRMS1,C11orf40,C12orf56,C16orf61,C17orf56,C20orf134,C20orf62,CCDC24,CCDC94,CD300LG,CEACAM3,CHERP,CHRNA9,CLCN5,CLCNKA,CLCNKB,CLEC2D,CLP1,CMAS,CPN1,CRISP1,CTNNA3,CTSZ,CYP3A43,DCUN1D2,DEPDC5,DHRS9,DIXDC1,DNAH14,DNAJB11,DNASE1L3,EPB41L5,ETNK2,FANCI,FHOD1,FITM1,GPR62,GSC2,GUCY2D,HMBS,ILF2,INTS8,ITGB…
hsa-miR-489	AAMP,ABCB1,ABLIM1,ABLIM2,ABLIM3,ACTR8,ADAMTSL1,ADRBK1,AEN,AGBL3,AKIRIN2,ALOX5AP,AMIGO2,AMY1B,ANKRD49,AP2S1,APIP,APOM,ARHGAP36,ASB1,ASCL1,ATAD2,ATG12,ATP1B3,ATP5S,ATP6V0A4,ATPAF1-AS1,AXDND1,B3GNT2,B4GALT3,BCAT1,BEX2,BPNT1,BRAP,BRF2,BRS3,BTG3,BTLA,BVES,C10orf122,C11orf57,C15orf24,C16orf7,C17orf58,C18orf10,C19orf59,C1orf110,C2orf47,C3orf39,C9orf131,C9orf68,CACNA1D,CACNG3,CALHM3,CALN1,CARTPT,CCDC111,…
hsa-miR-490-3p	ABCA3,ABCC2,ACAD9,ACTL6B,ADAMTSL4,ADCK4,AKAP8,AKD1,AKR1E2,ALKBH5,ALKBH6,ANKRD23,ANKRD24,ANKRD56,ANKRD6,ANKS6,APBA1,APOC2,APOD,AQP8,ARF5,ARFGAP1,ARHGAP32,ARHGAP33,ARID3A,ARID5A,ARPC2,ASB10,ASCC1,ATF6B,ATP6V1G3,ATXN7L1,AVL9,BAD,BCAR1,BCAS1,BEND5,BEND6,BST2,BTBD11,C12orf63,C13orf33,C16orf42,C16orf74,C1orf111,C1orf35,C1orf43,C22orf24,C5orf56,C6orf204,C9orf114,C9orf84,CACNA1H,CALB2,CARNS1,CBS,CCBL1,CC…
hsa-miR-490-5p	ABCC2,ACAA1,ADAMTS16,AGBL4,AGPAT1,AHRR,AKD1,AKR1C4,AKR7A2,ALDH1B1,ALG6,ALKBH3,AMIGO2,ANGPTL6,ANK1,ANKS4B,APBA1,APLNR,APOC2,APOC3,ARL4D,ARL9,ARMC6,ASB10,ASCC2,ATP2C2,ATP6V0D2,ATP6V0E1,ATP6V1G3,AVPR2,BAD,BAHCC1,BGN,BLNK,BMPR1B,BPY2,BTG4,BYSL,C10orf99,C11orf63,C13orf15,C15orf33,C17orf42,C17orf57,C18orf10,C19orf57,C1orf111,C1orf43,C20orf134,C2orf57,C2orf70,C3,C3orf32,C5orf56,C8B,C8orf42,C9orf40,C9orf…
hsa-miR-491-3p	ABCB1,ABHD2,ACRBP,ADPRHL1,ADSL,AGPHD1,AK7,ALMS1,ALOX5,ANXA1,APEX2,AQP3,ARF5,ARHGAP21,ARHGAP40,ARNTL,ARSA,ART1,AS3MT,ASH2L,ASNSD1,ATG4C,ATN1,AXDND1,AXIN2,BEST2,BOK,C10orf71,C14orf118,C15orf29,C15orf48,C18orf10,C18orf55,C1QBP,C1orf101,C1orf177,C1orf63,C20orf46,C20orf85,C3orf21,C4BPA,C4orf21,C9orf117,CAMK2D,CAMKMT,CARD14,CARD16,CCDC127,CCDC147,CCDC150,CCDC165,CCL7,CD48,CD82,CDC26,CDK13,CDK15,CDKN2C,…
hsa-miR-491-5p	ABHD16B,ABHD2,ABLIM2,ACOXL,ACP5,ACTL6B,ADAM18,ADAMTSL1,ADAMTSL4,ADCK4,ADH6,ADPRHL2,AFG3L1P,AGER,AGRN,ALDH18A1,ANKRD17,ANO10,AP3D1,APLP1,ARAF,ARHGDIB,ARSA,ARSI,ASCC1,ASCC2,ASNA1,ATN1,ATP2A1,BARHL1,BCL2A1,BCL6B,BEGAIN,BPIFB4,BRD4,C10orf96,C11orf45,C20orf27,C20orf4,C20orf96,C2orf43,C6orf15,C9orf16,CA11,CA7,CACNG1,CADM4,CARD16,CCDC106,CCDC132,CD7,CD82,CD99,CDA,CDH4,CDIPT,CDKN2C,CENPT,CEP89,CHAD,CIDEB…
hsa-miR-492	ABI3,ACOT6,ACSF3,ADAMTS12,AHSP,AKIRIN1,ALKBH6,ALOXE3,ANAPC2,ANKRD58,AP1M2,APOC2,ARHGAP30,ARHGDIB,ARHGEF40,ARMC6,ARPC2,ASB10,ATN1,ATP6V0B,B3GAT3,B3GNT8,BAIAP2,BARX1,BCAT2,BEST1,BEST2,BPIFB4,BPY2,BRIP1,BSG,BST2,BUD31,C10orf112,C10orf99,C15orf59,C19orf20,C19orf53,C1orf200,C20orf132,C20orf85,C2CD2L,C9,C9orf167,C9orf169,CALHM3,CARS,CATSPER3,CCDC59,CCM2,CD109,CD2,CD47,CDC34,CDC42EP2,CDCA3,CELA3A,CENPT,…
hsa-miR-493	AARS2,ABCC11,ACAA2,ADSSL1,AFG3L2,AHSG,AIP,AMIGO3,AMZ2,ANKRD10,ANKS1B,ANKUB1,ANO7,AP1S1,AP2A1,APOBEC3H,ARHGAP28,ARID4B,ASB16,ASB2,AVL9,AVPR2,B4GALNT3,BAIAP2L2,BCS1L,BEST3,BEX5,BPIFA2,BRAP,BRD4,C11orf2,C14orf1,C14orf49,C15orf44,C16orf62,C16orf78,C1QC,C1orf43,C20orf134,C2orf47,C7orf43,C8G,C9orf80,C9orf86,CACNG2,CACNG8,CALCA,CAPN10,CAPN9,CASP2,CAST,CBX1,CCDC102A,CCDC19,CCDC58,CCL17,CCM2,CCT2,CD163,CD…
hsa-miR-493_star	ACTR5,ASPM,ATP2A2,ATP6V1D,ATP6V1G3,BCOR,C1QBP,C1QTNF8,C3orf67,C8orf34,CBWD1,CBWD3,CBWD5,CBWD6,CCNA2,CDKL3,CFLAR,CHIC1,CLPX,CNGA1,CNTNAP4,COL9A3,CYP2D6,CYP2D7P1,DHX36,DSC1,DUSP12,FAM24B,FAM59A,FH,FUBP1,GABRA2,GABRA5,GNG11,GPC4,GTF2IRD1,GUCA1A,GUCA1C,HDAC8,HTATSF1,IDI2,ITGBL1,KCNJ6,KIAA1109,KIAA1704,KRT6A,LELP1,LINGO2,LRP6,MARK1,MEA1,MND1,MPP1,MRPL39,NDUFAF2,NLRP10,NR2C2,NTM,OMA1,OR9G1,PALB2,PCLO,P…
hsa-miR-494	ABCC5,ACTL6B,ACYP2,ADAMTSL1,AGBL4,AHSA1,ALG14,ALOX5AP,ANXA1,APIP,APOL4,AQP3,ARID4B,ASL,AVL9,BBOX1,BCMO1,BOD1L,BPIFA4P,C10orf35,C11orf61,C11orf63,C14orf39,C16orf53,C17orf62,C19orf56,C1GALT1C1,C1orf87,C20orf103,C2orf70,C5orf32,C6orf118,C6orf146,C7orf11,C7orf46,C8orf45,C8orf76,C8orf84,C9,CACNB2,CAMK1,CAPS2,CARD14,CASP6,CAV1,CBS,CBWD1,CBWD3,CCDC115,CCL2,CCNT2,CCRN4L,CCT8,CDCA2,CDCA3,CDS1,CENPC1,CEP15…
hsa-miR-495	AASS,ABCA2,ACTC1,ACTR6,ADAMTS19,ALKBH3,ALOX5AP,AMY2B,ANAPC1,ANAPC11,ANKLE2,ARHGAP44,AS3MT,ASB7,ASZ1,ATG16L2,ATOH1,ATP8A2,BCAT1,BCOR,BMP10,BMPR1B,BPY2,BRAF,BROX,BST1,BUB1,C12orf24,C16orf53,C17orf48,C17orf62,C19orf57,C1orf101,C1orf135,C1orf141,C2orf43,C3,C6orf115,C6orf221,C6orf62,C6orf64,C8orf4,C9orf68,C9orf78,CADPS2,CAMK2G,CASS4,CBX3,CC2D2B,CCDC102B,CCDC90B,CCDC91,CCNT2,CCT8,CD9,CDC34,CDK17,CDKAL1…
hsa-miR-496	AARS,ACAT2,ACTC1,ADAM18,ADAMTS20,ADCYAP1R1,ADHFE1,AHI1,ALDH6A1,AMELX,AMTN,ANKRD22,ANKS4B,APBA3,APIP,ARMCX5,ASAP2,ASB8,ASCC1,ATAD5,ATP13A3,ATP2A2,BCAR3,BCL2L10,BCL2L14,BRAF,BRIX1,BUB1,BZW2,C10orf68,C14orf149,C16orf80,C20orf195,C22orf36,C2orf47,C9orf46,C9orf96,CA8,CALY,CCDC129,CCDC150,CCDC33,CCL20,CCNT2,CCT8,CD9,CDCA7,CDH16,CDH8,CDK7,CENPK,CEP152,CETN3,CFH,CLDN20,CLEC4F,CLSPN,CLUL1,CMAHP,CNGA1,COL8…
hsa-miR-497	A4GNT,ABCF2,ACAD9,ACOX3,ACPP,ACSL5,ADAM12,ADAMTSL1,ADAP1,ALG12,ANAPC1,ANKRD13D,AP2A1,APOD,AQP11,ARAP3,ARHGAP18,ARHGDIA,ARHGEF25,ARMCX2,ARPP21,ASB1,ASNSD1,ATN1,ATP13A2,ATP5G1,ATP6V0B,ATRIP,ATXN7L2,AURKAIP1,AVEN,AVL9,B3GAT3,BBS2,BEST1,BEST4,BFAR,BIN1,BRD1,BRI3,BRMS1,BRP44L,BTN1A1,C11orf42,C11orf53,C11orf91,C14orf1,C17orf39,C17orf59,C17orf75,C1QB,C20orf46,C20orf96,C22orf28,C22orf40,C2orf28,C2orf42,C…
hsa-miR-497_star	AADACL2,ACYP1,AKT2,ANP32E,ARL4A,ARPC1A,ASB8,B4GALNT3,BCL11A,BTNL3,C20orf26,C3orf22,CALCA,CAPN12,CBR3,CCDC147,CCNO,CDC14B,CDRT4,CLIC5,CLP1,CMTM8,CNTNAP3,CNTNAP3B,CNTRL,COL14A1,CTHRC1,CYB5D2,DEFB136,DNAJC1,DOCK9,DSG1,EDAR,EDDM3A,EIF5A,ENTHD1,FAM168B,FAM178A,FAM178B,GFM1,GPR172A,GPR62,HMGA2,HP,ITIH2,ITSN2,KDM5A,L1CAM,MFSD5,MRPS26,MYBPHL,MYO9A,MYOG,NDUFB3,NLRP4,NOSTRIN,NPFFR1,NPPA,NSMAF,OR1L4,OR2M5,O…
hsa-miR-498	ABTB1,ADAD2,ADAP2,AIG1,AIMP1,ALDH4A1,ANKK1,AP1M2,APOL2,ARPC3,ASB7,ASPHD1,ATL1,ATP6V0D1,ATP7B,BFSP2,BRD1,BRD8,BRK1,BST2,C10orf76,C15orf43,C17orf46,C19orf2,C19orf40,C1orf177,C1orf35,C20orf112,C2orf61,C3orf23,C4BPA,C5,C7orf36,C9orf5,C9orf72,CA13,CA6,CACNA1A,CACNA2D3,CACNG1,CAPZA2,CCBL1,CCDC56,CCDC90B,CCL21,CCNDBP1,CCNG2,CD320,CDCA8,CDCP2,CDHR1,CEP152,CEP76,CHD4,CHEK2,CHODL,CLEC3B,CLVS2,CMTM2,CNIH,CN…
hsa-miR-499-3p	ACBD5,ACTL6B,ADAM18,ADAM2,ADH5,AGXT2,AK2,ALKBH8,ALPK2,AMY1B,ANKMY2,ANKS1A,ANO1,ANO5,APBB1IP,APOM,APTX,AQP11,ARID1B,ASB13,ASB3,ATP4A,ATP5J,ATP6AP2,ATP6V1E1,B3GNT1,B4GALT4,BCL2L14,BEND7,BEX2,BLCAP,BLVRA,BMS1,BPIFB1,BRD1,BRIP1,BVES,C10orf131,C10orf137,C10orf47,C10orf68,C12orf35,C14orf142,C16orf45,C16orf70,C1orf9,C6orf146,C6orf211,C7orf59,C8orf74,C9,CACNA1D,CACNG6,CBWD6,CCDC96,CCS,CD38,CDH1,CDKL3,CDX…
hsa-miR-499-5p	ADAM2,ADAT1,AFP,AGR3,ALKBH8,AMTN,ANAPC1,ANKRD49,AP3S1,AREGB,ARGLU1,ARMC2,ARPC3,ASB7,ASNSD1,ATF2,ATP13A4,ATP9A,AVPR1A,B3GALNT2,BCDIN3D,BEST3,BEST4,BIK,BLVRA,BNIP2,BSPRY,BTBD8,BTLA,C11orf49,C12orf35,C15orf24,C17orf63,C17orf75,C1orf100,C1orf186,C20orf132,C20orf24,C2orf42,C4orf41,C5,C6orf125,C7orf59,C9orf103,C9orf171,CABS1,CACNB2,CALHM3,CASC1,CBWD6,CCDC152,CCDC160,CCDC23,CCDC53,CCDC92,CCS,CD164,CD38,…
hsa-miR-500	AARSD1,ABCB11,ABCG5,ACO2,ACP6,ACYP1,ADH5,AGBL4,AHR,AKIRIN2,AKNAD1,AKT3,ARAF,ARHGEF38,ASPH,AVL9,B4GALNT3,BATF3,BCAT2,BDKRB1,C1orf130,C21orf58,C2CD3,C2orf29,C6orf162,C6orf192,C7orf46,C8orf34,CALML5,CASP6,CASP9,CBLL1,CCDC28A,CCNYL1,CCR4,CDK2AP2,CEP41,CEP70,CHIC2,CHODL,CKAP2,CLEC12B,CNOT10,COMMD3,COMMD7,CRCP,CXorf59,DCAKD,DCLRE1A,DCST1,DCTN2,DEFB125,DENND4B,DHRS2,DLEU7,DNAH11,DNAJB1,DUSP10,ELMO2,ELOV…
hsa-miR-500_star	ABCC11,ADM,ALG10B,BEST4,C10orf93,C12orf43,C17orf39,C19orf71,CCDC13,CCDC36,CCL8,CD247,CLTB,CNTLN,CXorf41,DNAJC9,FAM7A3,FES,FLCN,FTCD,GIPR,GJB5,GNRH2,GRK5,GRM1,HARS2,HBG2,HPN,HSPBP1,IL25,INCENP,ING1,L2HGDH,LBP,LDHAL6A,LILRA4,LMTK2,LY6K,MBOAT4,METTL21B,MGST3,MMEL1,NPSR1,NRF1,NSUN3,NTPCR,NUDT13,NUDT2,OGG1,OR52I2,PLD3,PLXDC2,POPDC2,PPP3CC,PPP4R1,PRL,PTAFR,RGS11,SLC26A6,SLC7A14,SNAI1,SPRR1A,SPZ1,SSX2,S…
hsa-miR-501-3p	ABCC2,ABHD3,ADAMTS3,ADSL,AFG3L2,AFMID,AGAP4,AGAP5,AGAP8,AKR1CL1,AKT1,AKT3,ALMS1,AMDHD1,ANGPTL2,ANKS4B,ARHGAP40,ARHGEF10,ARHGEF25,ARMC5,ARNT2,ARPP21,ARSF,ASB7,ASCL2,ATF7IP2,ATL1,ATP5G1,BAD,BASP1,BCMO1,BMS1,BRF2,BSPRY,C10orf11,C10orf93,C11orf24,C11orf34,C11orf53,C12orf43,C14orf102,C16orf53,C19orf29,C19orf33,C19orf71,C1orf131,C1orf177,C1orf93,C20orf173,C20orf43,C2orf54,C4orf17,C5orf42,C6orf72,C9orf1…
hsa-miR-501-5p	ABCG5,ACO2,ACP6,ACTR1B,ADAM20,ADAMTS6,ADAMTSL4,AFG3L2,AFM,AGRP,AHR,AKAP1,AKT1S1,ALDH3B1,ALX1,ANKRD36B,ANKRD6,ANKS3,ANPEP,APOD,ARHGAP17,ARHGEF25,ARL6IP4,ARMC4,ARMC5,ARPC2,ASCL2,ASGR1,ASTN2,ATF1,ATF7IP,ATG2A,ATN1,ATP5S,ATP6V1H,ATXN7L3,BBS9,BLOC1S1,C10orf28,C11orf85,C11orf88,C14orf159,C14orf39,C17orf59,C1orf101,C20orf152,C20orf173,C2orf84,C4orf19,C6orf221,C8G,C8orf34,CALB2,CALCA,CALML5,CAPN13,CASP6,…
hsa-miR-502-3p	ABCC11,ABCC2,ABHD3,ACER2,ACTR3B,ADAMTS3,ADAP2,ADCK4,ADM,AEBP1,AFG3L1P,AFG3L2,AGAP4,AGAP5,AGAP6,AGAP8,AGBL4,AHRR,AKR1CL1,AKT3,ALDH1L2,ALMS1,AMDHD1,ANKRD27,APOA4,ARFRP1,ARHGEF10,ARHGEF25,ARNT2,ARPP21,ATF7IP2,ATL1,ATP5G1,ATP7B,ATP9A,BAD,BRF2,BRS3,BSPRY,C10orf11,C10orf54,C10orf93,C10orf99,C11orf24,C11orf53,C12orf43,C14orf102,C15orf41,C16orf53,C17orf39,C17orf53,C17orf56,C19orf33,C19orf71,C1orf123,C1or…
hsa-miR-502-5p	AATF,ABCC11,ACO2,ACP6,ACTN4,ADCY5,ADH5,ADHFE1,AFG3L2,AGRP,AKAP3,ALG14,ANK1,ANKRD27,ANKRD44,AP1G2,AP4M1,APCDD1,APOBR,AQP5,ARAF,ARHGAP29,ARPC1B,ARSF,ART5,ASGR1,ASNA1,ATAT1,ATP13A1,ATP6V0D1,ATP6V1B1,BATF3,BCL2L10,BIN1,BST2,BTN1A1,C10orf108,C10orf116,C10orf99,C11orf86,C12orf52,C16orf79,C16orf89,C19orf28,C19orf80,C1orf135,C1orf172,C1orf43,C1orf85,C20orf173,C20orf54,C3AR1,C3orf18,C3orf39,C5orf38,C6orf1…
hsa-miR-503	AATK,ABCB8,ABCF2,ABHD16A,ACOX3,ACOXL,ACSBG2,ADAM15,ADAMTS18,ADAMTSL1,ADCK3,ADSS,AHNAK2,AHSA1,ALKBH3,AMIGO2,ANK3,ANKRD13D,ANKRD58,ANO10,AOAH,AP2A1,APOD,APTX,AQP8,ARFGAP2,ARL2,ARMCX2,ATG7,ATP6V1B2,ATRIP,ATXN2,AURKAIP1,AVEN,B3GAT3,B3GNT4,B3GNT7,BATF3,BCAP31,BCL2L10,BEST2,BLMH,BMX,BPIFA1,BRF1,BRI3,BSND,C11orf10,C11orf46,C11orf75,C11orf91,C14orf180,C15orf41,C19orf51,C19orf56,C1QB,C1QL3,C20orf46,C2orf4…
hsa-miR-504	AAAS,ABHD14A,ACCN4,ACPP,ACSBG2,ACTR1B,ADAMTS1,ADAMTS8,ADRBK2,AGPAT2,AGRP,ALDH4A1,ALPL,ALX3,AMDHD2,AP2A1,APBA3,APBB1,AQP5,ARL6IP4,ARMC5,ARRDC5,ASF1B,ATP2A1,ATP8B3,B3GALNT2,B3GNT6,BAZ1B,BRSK2,C10orf125,C12orf54,C12orf63,C16orf7,C16orf92,C19orf26,C20orf151,C22orf25,C3orf37,C6orf154,C7orf64,C9orf139,C9orf3,C9orf37,C9orf43,CAPN1,CAPN8,CAPN9,CARD6,CASZ1,CBWD1,CCDC102A,CCDC146,CCDC70,CDC42EP2,CDHR3,CEBP…
hsa-miR-505	AARSD1,ACOT4,ACP6,ACSM3,ACSS2,ADAT2,AGBL1,AKT3,ALG12,ALS2CR12,AMZ1,ANKMY2,APOBEC1,ARHGAP4,ASCL4,ASPRV1,ATP4A,ATP5F1,B3GNT4,BCAR3,BCL6,BPIFB3,BRCA2,BTD,BTLA,C12orf43,C17orf39,C18orf34,C1D,C1orf134,C1orf159,C20orf106,C2orf72,C2orf89,C3orf25,C5orf63,C7orf11,C8orf34,C8orf42,C8orf48,C9orf85,CABIN1,CACNB4,CAST,CATSPER4,CBWD1,CCDC28A,CCNC,CCR2,CD3E,CD96,CD97,CEP170,CES4A,CH25H,CHEK1,CHI3L1,CHI3L2,CMAHP,…
hsa-miR-505_star	ACAD10,ADAMTSL1,AJAP1,ANKRD52,ANO10,ATP1B2,BANF1,BEST3,BYSL,C10orf125,C3orf54,C5orf46,CD276,CD300A,CDH23,CHRND,CMTM5,COBRA1,COQ10A,CRIP3,CRTC1,CRYAA,DAP3,DBF4B,DNPEP,DOPEY1,DPM2,ELOF1,EXOC3L1,FAM110B,FBXO16,FCER1G,FKBP1C,FUS,GTF3C5,HIST1H2BK,HLA-DRB5,HPX,HSP90AB1,HTR3D,IFITM5,KAT8,KIAA1683,LDHA,LYZL6,MAGEA9B,MAP1LC3A,MRPS12,NEK10,NEK11,NEU3,NUDCD3,OOEP,PCNT,PLA2G4F,PLA2G5,PLK1,POP5,PPP1R7,PRPS1,P…
hsa-miR-506	AADACL4,ABHD16B,ABHD5,ACADVL,ACTR8,ADAM15,ADAM20,ADAMTS6,AGXT2L1,AIDA,AKNAD1,AKT1S1,ALAS2,ALS2CR12,ANKRD36B,AOAH,APBA3,APH1B,AQP11,ARHGAP39,ARHGEF40,ARPC1B,ASCC2,ASPA,ATG2A,ATP13A4,AURKA,AVPR2,AXDND1,BATF3,BAX,BCMO1,BEST2,BLMH,BMP6,BMS1,BTBD17,C10orf137,C10orf35,C10orf62,C10orf93,C11orf82,C11orf84,C13orf27,C17orf101,C17orf56,C18orf19,C19orf48,C19orf6,C20orf26,C20orf85,C21orf62,C3orf39,C4BPA,C6orf…
hsa-miR-507	AACS,ABCB10,ACAA1,ACTC1,ACTR1A,ADAM21,ADCK5,ADHFE1,ADRA1D,AEBP1,AGAP4,AGAP5,AGAP6,AGAP8,AGBL2,AGR3,AMN1,ANAPC2,ANKRD6,ANO2,APBA1,APBB3,APOD,APOOL,ARHGAP4,ARPC5L,BAD,BBX,BCAR3,BICC1,BID,BMP4,BPY2,BSPH1,C11orf52,C12orf48,C14orf102,C14orf109,C20orf112,C20orf123,C20orf195,C2orf43,C6orf126,C6orf136,C6orf70,C9orf89,CACNA1G,CAMK4,CAMSAP1,CC2D2A,CCDC30,CCK,CCL7,CCNT2,CDK7,CDKN1C,CES5A,CHD8,CLVS2,CNGA1,CO…
hsa-miR-508-3p	A3GALT2P,AADAT,ABI3BP,ACAT1,ACBD4,ACE,ACOT8,ADAD1,ADH5,ADH7,AGXT,AIFM2,AKAP3,ALG14,AMDHD1,AMELX,ANGPTL5,ANXA1,ANXA10,ANXA7,ARIH2,ARSF,ASL,ATL2,ATOH7,ATP6V0B,BAIAP2L2,BARHL2,BCHE,BEST3,BICD1,BLZF1,BOLA3,BPIFB1,BRI3,C10orf11,C10orf76,C10orf93,C11orf82,C12orf24,C12orf40,C12orf50,C12orf51,C17orf78,C18orf26,C19orf53,C1orf100,C1orf68,C20orf103,C20orf94,C6orf10,C6orf164,C7orf25,C8B,C9orf3,CACNB4,CCDC105…
hsa-miR-508-5p	ABCC3,ABCF3,ACACB,ACSS1,ACTC1,ADAM15,ADAT3,ADCY4,AIM1,AKIP1,AMELX,AMELY,AMICA1,AMOT,ANKRD33,AP3B2,APBB1,APOE,ARAP3,ARF6,ATAD5,ATP13A4,ATP4A,ATP5S,B3GALT6,B4GALT2,BATF3,BCAM,BCAN,BIRC2,BTG4,C17orf79,C17orf99,C1R,C1orf85,C20orf165,C2orf61,C6orf10,C6orf146,C6orf164,C8B,C8orf84,C9orf85,CARD14,CASS4,CBLN3,CCDC136,CCDC22,CCDC81,CCDC88B,CD2,CDAN1,CEP152,CEP63,CERS4,CGA,CHCHD8,CIB2,CKM,CLCC1,CLCNKA,CLCNK…
hsa-miR-509-3-5p	A4GNT,AAAS,AADAT,ABHD8,ACAD8,ACBD6,ACER2,ACOT12,ADC,ADRM1,AEBP1,AGPAT4,AGXT,AIG1,AIM2,ALKBH4,ANKK1,ANKRD24,ANKRD46,ANO9,AP1S1,APCS,APOA1BP,APOB,APOBEC2,APOH,APRT,ARFIP1,ARG1,ARIH1,ARMC6,ASB1,ASCC3,ATF2,ATG4D,ATP12A,BOC,BRI3,BRP44L,C10orf93,C11orf63,C12orf51,C14orf109,C15orf40,C16orf80,C17orf75,C17orf79,C19orf25,C19orf29,C19orf6,C1GALT1C1,C1orf177,C20orf134,C20orf43,C21orf56,C2orf72,C6orf141,C8orf…
hsa-miR-509-3p	A1CF,AAAS,ABCA3,ABCB11,ABHD5,ACAT2,ACO1,ACOX3,ACSM3,ACTC1,ACTR10,ADAMTS17,ADAMTSL5,ADC,ADCK2,AEBP1,AIM2,AKAP4,AKNA,AKR7A2,AKT1S1,ALDH9A1,ALDOB,ALKBH8,ALX1,AMIGO1,AMOT,ANAPC1,ANO8,APOBEC2,APOD,ARAF,ARF3,ARG1,AS3MT,ASCC3,ATF1,ATG4A,ATP5S,ATP6V1B2,B3GNTL1,BAZ1B,BCAT2,BMP15,BRDT,BRE,BTAF1,BTF3,BTN3A1,C10orf93,C12orf24,C14orf109,C17orf101,C17orf75,C19orf6,C19orf80,C1QB,C1S,C1orf105,C1orf172,C1orf93,C2…
hsa-miR-509-5p	A4GNT,AADAT,ACBD3,ACBD6,ACOT12,ADC,AEBP1,AGPAT4,AGXT,AIG1,AIM2,AIP,ANKK1,ANKRD24,ANO9,AP1S1,AP3B2,APOA1BP,APOH,APRT,ARIH1,ARMC6,ASB1,ASCC3,ASGR1,ASZ1,ATF2,ATP12A,ATP13A4,ATP9B,ATPAF2,AXDND1,BOC,BRI3,BRP44L,BSPH1,C10orf93,C11orf63,C12orf51,C14orf109,C15orf29,C15orf40,C16orf48,C16orf80,C17orf57,C17orf75,C17orf79,C18orf55,C19orf25,C19orf29,C19orf6,C1GALT1C1,C1orf177,C20orf134,C22orf23,C2orf47,C2orf7…
hsa-miR-510	ACIN1,ACTL6B,ACVRL1,AGPHD1,ALDH6A1,APCDD1,APOBR,ARHGEF1,ARHGEF16,ARMCX5,ASCC1,ATF7IP,ATP13A2,ATP6V0B,BFSP2,BIRC5,BPIFA2,BPIFB2,BTNL2,C16orf89,C19orf68,C1orf61,C20orf165,C2orf61,C6orf221,C7orf64,C8orf38,C8orf48,C9orf23,C9orf68,CASP9,CBR3,CCDC28A,CCDC70,CCNDBP1,CD2,CDCA7L,CDH15,CDH18,CDH24,CDKN2A,CELA1,CHD1L,CHIT1,CIDEC,CLN3,CNPPD1,COL20A1,COLQ,COMTD1,COPB2,COQ10A,CPSF3L,CRH,CRTAC1,CTDNEP1,CTH,DDB1…
hsa-miR-511	ABHD11,ACAA2,ADAL,ADCK2,ADPGK,AGMO,AGPAT3,AIRE,ALDH1A1,ANKRD1,ANKZF1,APOD,ARHGEF10L,ARSH,ARTN,ATG2A,AZI1,BBS2,BCO2,BMPR1B,BYSL,C11orf74,C14orf49,C16orf42,C16orf48,C16orf61,C16orf71,C19orf80,C1QL2,C1orf177,C1orf227,C1orf85,C5,C6orf115,C6orf163,C7orf23,C8B,CAPN2,CASC1,CCDC153,CD27,CD53,CDC25C,CDH15,CDH4,CDX2,CEACAM3,CENPW,CEP120,CHGB,CHRNB3,CHRND,CLDN14,CLEC1B,CNPY3,COL4A1,COL4A3,COMMD3,CPA6,CPXM1,…
hsa-miR-512-3p	AADAT,ABCF2,ABHD11,ACAA1,ADORA2B,ADSL,AEBP1,AFG3L1P,AGPAT2,ANAPC16,ANKK1,ANKRD24,ANP32B,APBB2,APH1B,APOBEC3A,ARPC3,ARTN,ASB18,ASL,ATP5S,ATP6V1D,BARX2,BCAN,BIRC7,BOC,BPHL,BPNT1,BPY2,BRE,BRP44L,BTBD8,C10orf58,C10orf93,C12orf65,C12orf66,C14orf80,C15orf40,C16orf59,C18orf10,C19orf2,C19orf39,C19orf45,C19orf53,C1orf129,C1orf135,C2,C2orf42,C2orf61,C3orf39,C3orf78,C5orf32,C6orf105,C6orf136,C6orf15,C6orf89…
hsa-miR-512-5p	ABCA7,ABHD11,ACAD8,ACP5,ACTG1,ADAM11,AFG3L1P,AKT2,ALDH1L1,AMDHD2,AMICA1,ANGPT4,ANKRD24,APOBEC3A,APOL3,ARAP1,ARC,ARHGAP4,ARPC1A,ARRDC2,ARTN,ASL,ATP5J,ATP5S,AVPR2,B9D2,BARX2,BIN1,BLNK,BPHL,BRF1,BRP44L,BTBD8,C10orf58,C11orf52,C11orf85,C15orf27,C15orf39,C15orf40,C15orf44,C16orf42,C16orf70,C16orf74,C17orf101,C17orf72,C18orf10,C19orf29,C1orf129,C1orf170,C2,C20orf29,C22orf40,C3orf45,C6orf105,C6orf57,C6o…
hsa-miR-513-3p	ABCB4,ABHD5,ADAMTS6,AFP,AGR3,AGTPBP1,AHI1,AHR,AIMP1,AKR1E2,ALDH2,ALMS1,AMTN,AP1M1,APLNR,APOC1,APOH,ARHGAP31,ARHGEF9,ARL6IP1,ARL9,ARPC3,ATF1,ATF6B,ATG4C,ATP12A,ATP6V1G3,ATP9A,ATXN7,B3GNT2,B4GALNT3,B4GALNT4,B4GALT3,BATF3,BCAS2,BCL2A1,BICC1,BMP15,BMS1,BRD8,BRIX1,C11orf73,C14orf37,C15orf48,C16orf47,C17orf75,C19orf2,C19orf59,C19orf69,C1D,C1orf192,C1orf51,C1orf63,C2orf47,C2orf73,C3orf33,C3orf39,C6orf13…
hsa-miR-513-5p	ABCC8,ABHD12B,ACCN1,ACE,ACPP,ACSS2,ACTA1,ADA,ADAMTS6,ADPRHL1,ADRA1B,ADRBK2,AFP,AGFG2,AKAP4,AKIRIN2,AKNA,AMICA1,ANPEP,AP1G2,APEX1,APLNR,ARHGEF9,ARL9,ASF1A,ASH2L,ASMT,ATF6B,ATL2,ATL3,ATP6V0A4,ATP9A,B4GALNT4,BABAM1,BCAS4,BHLHE23,BICC1,BMS1,BNIPL,BORA,BPIFB1,BTBD2,C12orf57,C13orf26,C14orf133,C14orf159,C16orf61,C16orf80,C19orf48,C19orf69,C1QL4,C1orf85,C2,C20orf26,C2orf53,CAGE1,CALY,CAPN13,CARD14,CASK,…
hsa-miR-514	ABCC9,ACMSD,ACO1,ACVR1,ACYP1,ADAM23,ADORA2B,ADRB3,AIMP2,AKAP4,ALDH1A1,AMZ2,ANKRD30A,APBB1,AQP7,ARHGEF9,ASB9,ATAD5,ATG3,ATOH1,ATP13A3,ATP1A3,ATP5G1,ATXN7,BBOX1,BCAS4,BEND2,BMP8A,BRE,BSPH1,C11orf10,C15orf55,C17orf101,C17orf58,C17orf66,C17orf79,C1orf101,C1orf131,C20orf26,C3orf14,C3orf25,C3orf67,C4A,C4orf41,C4orf50,C6orf103,C6orf192,CARD14,CCDC18,CCDC42B,CCNA1,CD248,CDH22,CDYL2,CENPT,CEP152,CHCHD8,CH…
hsa-miR-515-3p	AADAC,ABCA6,ABHD16A,ACAA1,ACCN3,ADAMTSL5,ADPRHL2,ADRA1B,AGBL4,AHR,AKR1E2,AKR7A2,ALS2,ANKHD1,ANKMY1,ANKRD44,ANKRD46,ANKS6,AP3S1,APBB3,APIP,ARID5A,ARIH1,ASF1B,ASNA1,ASS1,ATP6V0B,ATXN7L1,BARHL2,BCOR,BIRC7,BORA,BRF2,BTBD8,BTG4,BTK,C10orf71,C11orf31,C11orf52,C12orf63,C12orf65,C14orf1,C14orf2,C14orf48,C14orf49,C19orf25,C1orf127,C1orf182,C1orf74,C1orf85,C1orf87,C20orf134,C22orf28,C2orf42,C2orf47,C3orf67…
hsa-miR-515-5p	ABLIM3,ACSBG2,ACVR2B,ADCK1,ADCK4,ADPRHL2,AFAP1L2,AGBL4,AIM2,AK7,ALDH8A1,ALKBH4,ALOX5,AMOTL1,ANKHD1,ANKK1,ANKRD30A,ANKRD44,ANKRD5,ANUBL1,AP3S1,ARGLU1,ARHGDIB,ARHGEF10L,ASCL1,ATP6V0B,AZGP1,BAD,BARHL2,BARX2,BCDIN3D,BCL2L14,BEND5,BEX5,BIN3,BORA,BRD1,BRK1,C11orf52,C14orf102,C14orf109,C14orf133,C15orf48,C15orf55,C17orf47,C17orf79,C20orf24,C20orf46,C2orf15,C2orf42,C6orf27,C6orf48,C9orf86,CA9,CAB39L,CACN…
hsa-miR-516a-3p	ABCA3,ABP1,ACO1,ACSS2,ACTR1B,ADAM18,ADAM22,ADAMTS10,ADCK1,AEBP1,AFAP1,AGER,AGFG2,AIFM1,AKT3,ALDOA,ALOXE3,ALS2CR8,ANKHD1,ANKRD33,ANKRD42,ANKRD52,APBB1,APH1B,AQP11,ARAP1,ARHGAP20,ARMC9,ARPC1A,ARPC1B,ARPC2,ARSF,ASNA1,ASTN2,ATP13A2,ATP1A1,ATP4A,ATP6V1F,BABAM1,BAP1,BATF2,BPIFA2,BRAT1,BST2,BUD13,C10orf35,C11orf54,C11orf63,C11orf86,C12orf68,C13orf33,C14orf102,C14orf166,C14orf80,C15orf23,C16orf74,C16orf7…
hsa-miR-516a-5p	A4GALT,ABCC10,ABP1,ACACB,ACADS,ACBD5,ACP2,ACRBP,ACSM5,ADAM30,ADAMTSL4,ADH6,ADRB2,ADSL,AGBL5,AGXT2,AGXT2L1,AIF1,AJAP1,ALDOA,ALG1L,ALMS1,ALPK1,ALS2CR12,ANKRD33,ANO5,APH1A,APOBEC2,AQP11,AQP8,ARF6,ARHGAP21,ARHGAP28,ARHGEF10L,ARHGEF35,ARMCX5,ARPC3,ARPC5L,ASGR1,ATG7,ATOH1,ATP4A,ATP6V0A2,ATP6V0D1,ATP8B2,AVPR2,BABAM1,BAI1,BATF,BBS4,BLNK,BNC2,BPIFC,BRCA1,BRIP1,BST2,BTBD6,BTLA,BZW1,C10orf137,C10orf90,C11or…
hsa-miR-516b	A4GALT,AACS,AARS,ABCC10,ABL2,ABLIM2,ABTB1,ACAD9,ACBD5,ACOX3,ACP6,ACSS2,ACTA1,ADAM18,ADCY5,AFAP1,AGBL5,AGPAT2,AGXT,AIF1L,AJAP1,AKT3,ALDH8A1,ALDOA,ALG1L,ALMS1,ALOXE3,ALPL,ALX3,AMDHD2,ANKHD1,ANKMY2,ANKRD33,APEH,ARHGAP21,ARHGEF10L,ARHGEF16,ARHGEF25,ARPC3,ARSF,ASB1,ASB10,ASB12,ASB2,ASPRV1,ATP6V0D1,ATP6V1F,ATXN7L2,AVPR2,AXDND1,BAIAP3,BATF3,BBOX1,BCAS4,BCKDK,BCL2A1,BDKRB1,BGLAP,BPI,BPIFA2,BPY2,BRD4,BST2…
hsa-miR-517a	AASS,ABCG4,ABI2,ACAA1,ACSM5,ACTR1B,ACTR3B,ADAM2,ADAMTS2,ADRBK2,AGA,AGT,AHNAK2,AHRR,AHSA1,AIMP1,AKAP17A,AKIRIN1,AKR1C4,ALS2CL,ANKRD2,ANKS1B,APEH,APPL2,AQP5,AREGB,ARHGAP18,ARHGAP27,ARHGAP33,ARHGAP40,ARHGEF10L,ARHGEF26,ARIH2,ARL5C,ARPC2,ATF7IP,ATG2A,ATRIP,AVPI1,B4GALNT3,BANP,BARD1,BDH1,BHLHE41,C10orf81,C14orf1,C17orf75,C19orf26,C19orf28,C19orf45,C19orf63,C1QTNF4,C1orf123,C1orf63,C20orf118,C20orf94,C…
hsa-miR-517b	ABCG4,ABI2,ACTR1B,ACTR3B,ADAM2,ADAMTS2,AFG3L2,AGA,AHNAK2,AHR,AHRR,AHSA1,AIMP1,AKAP17A,AKIRIN1,ALG12,ANK1,ANO2,APBA1,APEH,APPL2,AQP5,AQP9,ARHGAP18,ARHGAP27,ARHGAP33,ARHGEF38,ARL5C,ARMC4,ATAD3B,ATRIP,B4GALNT3,BANP,BDH1,BEST3,C10orf81,C12orf51,C14orf1,C19orf26,C19orf28,C19orf63,C19orf71,C1QTNF4,C1orf177,C1orf63,C20orf118,C20orf24,C2orf72,C3orf77,C5orf42,C7orf42,C8orf48,CA7,CALB2,CCAR1,CCDC132,CCDC63…
hsa-miR-517c	AASS,ABCD2,ABCG4,ABI2,ABI3BP,ACAA1,ACTR1B,ACTR3B,ADAM2,ADAMTS2,ADRBK2,AHNAK2,AHRR,AHSA1,AIMP1,AKAP17A,AKIRIN1,AKR1C4,ALG12,ANKRD2,ANKS1B,APEH,APPL2,AQP5,AREGB,ARHGAP18,ARHGAP27,ARHGAP33,ARHGAP40,ARHGEF10L,ARHGEF26,ARIH2,ARL5C,ARMC4,ATF7IP,ATG2A,ATP12A,ATP2C2,ATRIP,ATXN7L1,AVPI1,B4GALNT3,BANP,BARD1,BDH1,BHLHE41,C14orf1,C16orf53,C17orf75,C19orf26,C19orf28,C19orf45,C19orf63,C1QL3,C1orf63,C20orf118,C…
hsa-miR-517_star	ACO2,ADAM2,AMICA1,AMOT,APOA1BP,ARIH1,AVPR2,C12orf51,C1orf129,C1orf43,C1orf85,C7orf51,C9orf117,C9orf43,CCDC130,CCDC15,CDH23,CMAS,COQ5,DGKG,DLGAP4,DPF2,EDN2,ENAH,FAM149B1,FAM5C,FOXRED1,GADD45G,GDF2,GJD3,GMPR2,GNMT,GPR110,GPSM1,GRM5,HAT1,HIST2H2AA3,HMBS,HMOX1,HPS6,IL36G,KLHL4,LARP7,LPHN2,LUC7L3,MAPKAPK5,MRI1,MRPS12,NDUFS5,NFKBIE,NPRL2,OIT3,OXCT2,PCYT1B,PPA1,PRRG3,PTGDS,PUS10,RABEP1,REXO1,RPS26,RSG1,…
hsa-miR-518a-3p	AACS,AARS,ABLIM1,ABTB1,ACOT7,ADAM15,ADAMTS13,ADAMTSL2,ADCK1,ADCK3,ADCK5,ADCYAP1R1,ADH1B,ADH5,ADRA1B,ADRM1,ADSL,AFG3L1P,AGXT,AHDC1,AIG1,AKAP5,AKR1B1,ALOX5AP,AMD1,ANAPC16,ANKHD1,ANKRD18A,ANKRD33B,ANKRD42,ANKRD46,ANKS1B,ANO1,ANXA5,ANXA7,AOAH,AP1G2,APITD1,APOBEC2,ARHGAP19,ARHGAP22,ARHGEF1,ARIH2,ARMC6,ARMCX6,ARPC3,ARSF,ART1,ASCL1,ASGR1,ASIP,ATF3,ATOH7,ATP13A4,ATP5L,ATP6AP1,ATP6V0E1,ATP6V1B2,ATP6V1F,AV…
hsa-miR-518a-5p	AACS,ABHD5,ACACB,ACTR10,ACTR3,ADAMTSL1,ADRB2,AGXT2,AHRR,AIG1,AKR1B1,ALDH1A1,AMIGO2,AMT,ANKIB1,ANKRD5,ANO10,AOAH,AP1G2,AP1S1,AP2M1,APOB,APRT,AQP8,ARF6,ARGLU1,ARHGAP17,ARHGAP33,ARHGEF1,ARHGEF38,ARL4D,ARMCX2,ARMCX6,ARPC2,ART3,ASB10,ASCC2,ASTN2,ATAD3A,ATAD3B,ATG16L2,ATP6V0E1,ATP6V1D,ATXN7L1,AVPR2,AWAT2,B4GALT2,BANP,BBOX1,BCMO1,BFSP1,BIN3,BLCAP,BNIPL,BRI3,BZRAP1,C11orf34,C12orf11,C12orf40,C15orf32,C16…
hsa-miR-518b	ABHD8,ABTB1,ACO1,ACTG1,ACTN4,ACTR2,ACTR3,ADAM19,ADAMTS13,ADCK3,ADCY7,ADRA1B,ADRM1,AFG3L1P,AGAP3,AHDC1,AIG1,AKAP5,AKR1B1,ANKHD1,ANKRD18A,ANKRD42,ANKRD5,ANO1,ANO7,ANXA5,AOAH,AP1G2,APITD1,APOB,APOBEC2,ARF5,ARHGAP22,ARIH2,ARMCX6,ARPC3,ARSF,ART1,ASGR1,ASIP,ATAD3C,ATF2,ATP13A4,ATP6AP1,ATXN7L3,AVPR2,BACE2,BAG3,BAMBI,BANP,BBX,BCL9L,BCMO1,BFSP1,BICC1,BLMH,BNIPL,BRE,BSPH1,BTBD8,BTK,BTNL9,C10orf125,C12orf40…
hsa-miR-518c	ABCA12,ACO1,ACOT7,ACSS3,ACTG1,ACTR2,ADAM19,ADAMTS13,ADAMTSL2,ADAT2,ADCK3,ADCY7,ADRA1B,ADRM1,AFG3L1P,AHRR,AIG1,AKAP5,AKR1B1,ALDOB,ANKRD18A,ANKRD33B,ANKRD42,ANKRD5,ANO1,ANXA5,AOAH,APITD1,APPL2,ARFGAP3,ARHGAP22,ARIH2,ARL13B,ARMC6,ARMCX6,ARPC3,ARSF,ART1,ASB18,ASGR1,ASIP,ATAD3A,ATAD3B,ATP13A4,AVPR2,BACE2,BAG3,BAMBI,BANP,BBX,BCL9L,BCMO1,BET1L,BFSP1,BICC1,BLMH,BNIPL,BRE,BSPH1,BTK,BTNL9,C10orf125,C11orf7…
hsa-miR-518c_star	A1CF,AAMP,ADAM15,ADAM18,ADCY5,ALPL,ANKRD33,ARF5,ARHGEF19,ARPC4,BACE2,BAG3,BPY2,BRD8,BST2,C10orf28,C11orf48,C16orf78,C1QC,C1orf110,C1orf200,C1orf43,C21orf128,C9orf102,C9orf43,CAND2,CCDC144A,CCDC53,CCL26,CCS,CD180,CD300LD,CD300LG,CD84,CDH23,CDK4,CLEC2A,CLRN1,COPE,DCTN3,DDB2,DDT,DEFB106A,DEFB106B,DEPTOR,DNLZ,DPF2,ECHDC1,EEF2,EMR1,ENDOU,ETNK2,FAM135A,FAM3A,FAM55B,FAM63A,FBXO47,FLT3,FUT3,FXYD4,G0S2,GA…
hsa-miR-518d-3p	ABCA12,ABCB10,ABHD8,ACO1,ACOT7,ACTG1,ACTR2,ADAM19,ADAMTS13,ADAMTSL2,ADCK3,ADCY7,ADRA1B,ADRM1,AFG3L1P,AGAP3,AHDC1,AHRR,AIG1,AKAP5,AKR1B1,AMD1,ANKHD1,ANKK1,ANKRD18A,ANKRD42,ANKRD46,ANKRD5,ANO1,ANO8,ANXA3,ANXA5,AOAH,AP1G2,APITD1,APOBEC2,ARHGAP20,ARHGAP22,ARIH2,ARMC6,ARMCX6,ARPC2,ARPC3,ARSF,ART1,ASB2,ASGR1,ASIP,ATAD3C,ATP13A4,ATP6AP1,AVPR2,BAALC,BACE2,BAG3,BANP,BBX,BCL7B,BCL9L,BCMO1,BET1L,BICC1,BLMH,…
hsa-miR-518d-5p	AAMP,ABCC5,ABHD12,ABHD5,ACAA1,ACBD5,ACSM3,ACTG1,ACTR3,ADAM15,ADAMTS13,AIG1,AIRE,AKAP5,AKNAD1,ALAS2,ALG13,ALG14,ALOX5AP,AMICA1,ANKHD1,ANKRD33,ANKRD33B,ANKRD43,ANXA10,AOX1,AP3B2,AP3M1,APEH,APITD1,APOA1BP,APOA2,APOL3,ARHGAP22,ARHGEF1,ARHGEF16,ARSI,ASCL1,ATF2,ATP13A4,ATP2A2,ATP6V0E1,ATP6V1G1,ATP6V1H,ATXN7L2,AVPR2,B4GALT3,B9D2,BACE2,BAG3,BATF3,BCAN,BCHE,BDKRB1,BICC1,BIN1,BMPER,BPGM,BSND,BST2,BSX,BTLA,…
hsa-miR-518e	ABCA12,ABHD14B,ACAA1,ACOT7,ACTG1,ACTN4,ADAMTS13,ADAMTSL2,ADAT2,ADC,ADCK3,ADCY7,ADRA1B,ADRM1,AEN,AFG3L1P,AGXT2,AHDC1,AIRE,AK8,AKAP5,AKR1B1,ALDH1A1,ALDH6A1,AMN,ANKHD1,ANKRD18A,ANKRD43,ANKRD5,ANO10,ANXA5,AOAH,APITD1,ARF5,ARHGAP22,ARIH2,ARMC6,ARMCX2,ARPC3,ASGR1,ASIP,ATAD3A,ATAD3B,ATAD3C,ATG16L2,ATP13A2,ATP13A4,ATP1A4,ATP6AP1,ATP6V1F,ATP9A,AUTS2,AWAT2,B4GALNT3,BACE2,BAMBI,BATF,BBX,BCL2L11,BCL7B,BCMO1,…
hsa-miR-518e_star	AAMP,ABHD12,ADAM15,ALG13,ALPL,AMICA1,ANKRD33,AP3B2,APOL3,ARF5,ARHGEF19,ARPC4,ARSI,AVPR2,BACE2,BAG3,BATF3,BRD8,BST2,C12orf11,C16orf78,C19orf56,C1orf110,C1orf200,C1orf43,C1orf98,C20orf196,C21orf128,C3orf25,C9orf43,C9orf84,CARD16,CBX8,CCDC130,CCDC53,CCL26,CD19,CD84,CDH23,CLEC2A,CLRN1,CLYBL,CNTNAP3B,COQ5,CPNE8,CXorf26,CYB5R4,DBC1,DCTPP1,DEPTOR,DPF2,ECHDC1,ELP4,ENDOU,ETFA,EWSR1,FAM135A,FAM194A,FAM3A,F…
hsa-miR-518f	AARS,ABCA12,ABCB10,ACO1,ACOT7,ACSS3,ACTR2,ACTR3,ADAM19,ADAMTS13,ADAMTSL2,ADCK3,ADCY7,ADH7,ADRA1B,ADRM1,ADSL,AEBP2,AFG3L1P,AGAP3,AHRR,AIG1,AKAP5,AKR1B1,ALDH1B1,ALDH6A1,ANAPC16,ANKHD1,ANKRD18A,ANKRD33B,ANKRD42,ANKRD5,ANO1,ANXA5,AOAH,APITD1,APOBEC2,ARHGAP22,ARIH2,ARL13B,ARMC6,ARMCX6,ARPC3,ARSF,ART1,ASGR1,ASIP,ATAD3A,ATAD3B,ATOH7,ATP13A4,ATP1A1,ATP6AP1,ATP6V1B2,ATXN7L2,ATXN7L3,AVPR2,BACE2,BAG3,BAMBI,…
hsa-miR-518f_star	AAMP,ABHD12,ADAM15,ALG14,ALPL,AMICA1,ANKRD33,APOA1BP,APOL3,ARHGEF19,ARSI,AVPR2,BACE2,BAG3,BATF3,BRD8,BST2,C11orf48,C12orf11,C16orf78,C19orf56,C1orf110,C1orf200,C1orf43,C1orf98,C9orf102,C9orf43,C9orf84,CBX8,CCDC130,CCDC53,CCL26,CCL5,CD300LD,CD300LG,CD84,CDH23,CLEC2A,CLRN1,CNTNAP3B,COPE,COQ5,CPNE8,CXorf26,CYB5R4,DBC1,DCTPP1,DNLZ,DPF2,ECHDC1,ELP4,ENDOU,ETFA,EWSR1,FAM135A,FAM194A,FBXO47,FBXO7,FCGBP,F…
hsa-miR-519a	AADAC,ABHD16A,ABT1,ACAA2,ACAT2,ACSS2,ACTR6,ADAMTS8,ADAP2,ADPRHL2,AHSG,AIMP2,AKR1D1,ALG12,ALPK1,AMDHD1,ANAPC5,ANKHD1,ANKRD37,ANKRD44,ANO8,ANUBL1,ANXA13,ANXA7,AOC2,APCDD1,APOBEC2,APOOL,ARHGAP12,ARHGAP4,ARHGEF11,ARMC2,ARSF,ART3,ATAD3A,ATAD3B,ATG2A,ATG2B,ATP12A,ATP6V0E1,ATP6V1B1,ATP8B4,AVEN,B3GNT8,BAG3,BANK1,BBS2,BBX,BCL2L11,BCO2,BEST3,BEX5,BNC2,BOC,BPIFB4,BTD,C10orf137,C11orf30,C11orf74,C12orf40,C12…
hsa-miR-519b-3p	AADAC,ABCD2,ABHD16A,ABT1,ACAA2,ACAT2,ACSS2,ACTR6,ADAMTS8,ADAP2,AHSG,AIMP2,AKR1D1,AKTIP,ALG12,AMDHD1,ANAPC5,ANGPTL1,ANKRD44,ANKRD53,ANO8,ANUBL1,ANXA10,ANXA13,ANXA7,AOC2,APCDD1,APOBEC2,APOBEC3F,APOOL,ARHGAP12,ARHGAP35,ARHGAP4,ARHGEF11,ARMC2,ARSF,ART3,ASB7,ATAD3B,ATG2A,ATG2B,ATP12A,ATP6V0A2,ATP6V0E1,ATP8B4,AVEN,B3GNT8,BAG3,BBS2,BBX,BCL2L11,BCO2,BEST3,BEX5,BNC2,BOC,BPIFB4,BTD,C11orf30,C12orf44,C14orf…
hsa-miR-519c-3p	A1CF,AADAC,ABHD16A,ABT1,ACAT2,ACO1,ACSS2,ACTR6,ADAMTS8,ADAP2,ADRA1B,AIMP2,AKNAD1,AKR7A2,ALG12,ALG14,ALPK1,AMDHD1,ANAPC5,ANKRD37,ANKRD44,ANO8,ANUBL1,ANXA13,ANXA7,AOC2,APCDD1,APOBEC2,ARHGAP4,ARHGEF11,ARMC2,ARMCX1,ARSF,ART3,ASB7,ATAD3B,ATG2A,ATG2B,ATP12A,ATP8B4,AVEN,B3GNT8,BAMBI,BANK1,BCHE,BCL2L11,BEST3,BEX5,BOC,BPIFB4,BTD,BTG3,C12orf40,C12orf44,C13orf30,C14orf28,C19orf48,C19orf53,C1orf141,C1orf63,C…
hsa-miR-519d	AADAC,AARS2,ABCC5,ABCD3,ABHD11,ACAD9,ADCY7,ADHFE1,ADORA2B,ADPRHL2,ADRA1B,AIFM1,AIG1,AKR7A2,AMDHD1,ANKHD1,ANKRD29,ANKRD44,ANKRD46,ANKRD9,ANUBL1,AP4S1,APOB,APOBEC2,ARHGAP35,ARL4D,ATAD3B,ATG2B,ATP12A,ATP6V0E1,ATP6V1B1,ATXN1,B3GALNT2,B4GALNT3,BACE2,BAMBI,BAX,BCL2L10,BCL2L11,BEST3,BEX5,BLZF1,BNIP2,BPHL,BRMS1L,BSND,BTG4,C11orf30,C11orf73,C11orf74,C11orf82,C12orf42,C15orf40,C16orf71,C16orf89,C19orf2,C1o…
hsa-miR-519e	AADAC,ABCA6,ABCD3,ABHD11,ABHD16A,ABL1,ACAA1,ACAD9,ACBD3,ACOX3,ADAMTSL2,ADAMTSL5,ADAP2,ADCK5,ADCY7,ADPRHL2,ADRA1B,AGBL4,AHNAK2,AHR,AHSG,AKIRIN2,AKR7A2,ALPK1,ANKHD1,ANKMY1,ANKRD29,ANKRD46,AP4S1,APBB2,APBB3,APIP,APOOL,AQP11,ARHGAP30,ARHGEF12,ARID3C,ARID5A,ARIH1,ARL13A,ARSF,ASF1B,ASNA1,ASS1,ATAD3B,ATP6V0B,ATXN1,ATXN7L1,BARHL2,BCL11A,BORA,BTG4,BTK,C10orf125,C10orf71,C11orf31,C11orf74,C12orf48,C12orf63…
hsa-miR-519e_star	ABLIM3,ALDH4A1,ANKRD30A,C10orf62,C18orf56,CACNA1A,CBX1,CD33,CDH26,CHRD,COPS8,CXCL6,CXorf40B,CYR61,DBC1,DIO1,ENTPD1,FAM105B,FAM135B,FAM162A,FAM86B1,FAM86B2,FBXO25,FIBP,GDPD2,GLP2R,GPC3,HAT1,HES1,HRCT1,HTRA4,IDH3B,IPPK,JMJD7-PLA2G4B,KCNK16,LDHC,MCCC1,MRPS33,MTHFR,MYOZ1,NIT1,P4HA2,PASK,POU2F1,PPT2,PRADC1,PRKG2,PSMD11,RBM41,RERGL,RNLS,SERPINA4,SLC35A2,SLC39A6,SPAG4,STXBP3,SUCNR1,TMEM52,TRADD,UGT3A1,V…
hsa-miR-520a-3p	A4GALT,AADAC,ABCG2,ABHD11,ABHD15,ACAA1,ACAD9,ACADVL,ACTR10,ADHFE1,ADORA2B,ADPRHL2,ADRA1B,ADSL,AEBP1,AGAP2,AGFG2,AIFM1,AIP,AK2,AKR7A2,AKTIP,ANKMY1,ANKRD44,ANKRD46,AP1M1,APCDD1L,APCS,APH1B,APOB,APOBEC3H,APOBEC4,APP,ARAP2,ARHGAP18,ARHGAP22,ARHGEF3,ARID4A,ARL4D,ARL6IP4,ARMC2,ARPC3,ASB9,ASL,ASNA1,ATAD2,ATF6B,ATP5SL,ATP6V0A4,AVPI1,B3GALNT1,B3GALNT2,B4GALNT3,BAD,BAMBI,BCL2L10,BCL2L14,BEND7,BLVRA,BPHL,BR…
hsa-miR-520a-5p	AARS,ABCC10,ABCC3,ABCF3,ABHD11,ABL1,ACAD8,ACTRT1,ADAM15,ADAMTS13,ADAMTS20,ADH5,ADIPOR1,AIRE,AKAP4,ALG1,ALG13,ALPL,AMICA1,ANKMY1,ANKRD33,ANKRD44,ANKRD5,ANKRD56,ANKS3,ANKS6,ANKZF1,AP3B2,APEH,APOA1BP,ARAF,ARF5,ARHGAP22,ARHGEF40,ARIH2,ARL4D,ASH2L,ASPH,ASRGL1,ATAD5,ATF2,ATF6B,ATP10A,ATP4A,ATP5D,ATP5S,ATP5SL,ATP6V1C2,ATP6V1E2,ATP6V1H,B4GALNT3,B9D2,BAD,BAG1,BAX,BBS2,BCAP31,BCL2L14,BMPER,BRAT1,BRP44,BSND…
hsa-miR-520b	AADAC,ABCG2,ABHD11,ACAD9,ACADVL,ACTRT1,ADAD2,ADHFE1,ADIPOR1,ADRA1B,ADSL,AEBP1,AGAP2,AGFG2,AGPAT4,AHRR,AIFM1,AIP,AK2,AKNAD1,AKR7A2,AKT1,ANKRD44,ANKRD46,ANXA5,AP1M1,APCS,APH1B,APOB,APOBEC3H,APOBEC4,APP,ARFGAP2,ARHGAP20,ARHGAP30,ARHGAP32,ARL13B,ARL4D,ARL6IP4,ARMC2,ARPC3,ASAH1,ASB9,ASL,ATAD2,ATF6B,ATP6V0A4,AVPI1,B4GALNT3,B9D2,BAD,BAMBI,BARX2,BCL2L10,BCL2L14,BCL6,BLVRA,BPIFB3,BRE,BUD13,BYSL,C10orf125,…
hsa-miR-520c-3p	AADAC,ABCG2,ABHD11,ACAD9,ACADVL,ACTRT1,ADAD2,ADHFE1,ADIPOR1,ADRA1B,ADSL,AEBP1,AGAP2,AGPAT4,AHRR,AIFM1,AIP,AK2,AKNAD1,AKR7A2,AKT1,ANKRD44,ANKRD46,ANXA5,AP1M1,APBB2,APCS,APH1B,APOB,APOBEC3H,APOBEC4,APP,ARFGAP2,ARHGAP20,ARHGAP30,ARHGAP32,ARHGEF7,ARL13B,ARL4D,ARL6IP4,ARMC2,ARPC3,ASAH1,ASB9,ASL,ATAD2,ATF6B,ATP6V0A4,AVPI1,B4GALNT3,B9D2,BAD,BAMBI,BARX2,BCL2L10,BCL2L14,BCL3,BCL6,BLVRA,BPIFB3,BRE,BRP44L,B…
hsa-miR-520d-3p	A4GALT,AADAC,ABCG2,ABHD15,ABLIM1,ACAA1,ACAD9,ACADVL,ADHFE1,ADIPOR1,ADRA1B,ADSL,AEBP1,AGAP2,AGBL4,AGFG2,AIFM1,AIP,AK2,AKR7A2,ANKMY1,ANKRD44,ANKRD46,APCS,APH1B,APOA5,APOBEC3H,APOBEC4,APP,ARHGAP22,ARID4B,ARL4D,ARL6IP4,ARMC2,ARPC3,ASB9,ASCC3,ASF1B,ATF6B,ATP6AP1L,ATP6V0A4,ATXN2,B3GALNT2,B9D2,BAD,BAMBI,BCL2L10,BCL2L14,BCL6,BLVRA,BRE,BRF2,BSCL2,C10orf90,C10orf96,C11orf30,C11orf82,C11orf88,C12orf11,C14or…
hsa-miR-520d-5p	ABLIM1,ABRA,ACCS,ACSM5,ACTA1,ADAMTS16,ADAMTSL1,ADAMTSL3,ADI1,ADIPOR1,ADRBK1,AFG3L2,AK7,ALDH1A1,ALG1,ALMS1,AMIGO2,AMT,ANAPC1,ANGPTL7,ANKIB1,ANKMY1,ANKRD18B,AP2A1,AP2M1,APH1B,AQP8,AQR,ARAF,ARHGAP33,ARPC2,ASB13,ATAD3B,ATAD5,ATF1,ATG16L2,ATOH7,ATP1A1,ATP5L,ATXN2,AURKC,AUTS2,BAG1,BAG3,BAX,BCAT1,BCCIP,BCL3,BEST2,BOD1,BUB3,BUD13,C10orf96,C11orf10,C11orf53,C11orf58,C14orf149,C15orf32,C17orf75,C17orf79,C1…
hsa-miR-520e	AADAC,ABCC3,ABCG2,ABHD11,ACAD9,ACADVL,ADAD2,ADAM23,ADHFE1,ADIPOR1,ADRA1B,ADSL,AEBP1,AGAP2,AHRR,AIFM1,AIP,AK2,AKNAD1,AKR7A2,ANKRD44,ANKRD46,AP1M1,APBB2,APCS,APH1B,APOB,APOBEC3H,APOBEC4,ARFGAP2,ARHGAP20,ARHGAP30,ARHGAP32,ARL4D,ARL6IP4,ARMC2,ARPC3,ASB9,ASL,ATF6B,B4GALNT3,BAD,BAMBI,BARX2,BAX,BCL2L14,BCL6,BEND7,BLVRA,BRE,BSND,BST2,BUD13,C10orf125,C11orf54,C11orf82,C11orf88,C12orf11,C12orf66,C14orf177,…
hsa-miR-520f	AADAC,ABCA6,ABCC3,ABCG2,ACAD9,ACADVL,ACAT2,ACBD3,ACTA1,ACTR10,ADAD2,ADAMTSL1,ADPRHL1,AGAP2,AGBL4,AGPAT4,AIP,AK2,AKNAD1,AKR7A2,ALAS2,ALG8,ALPK1,AMIGO3,ANKRD22,ANKRD46,ANKS6,AP1M1,APCS,APH1B,APOB,APOBEC3H,APOBEC4,APP,AQP9,ARAP3,ARFGAP2,ARHGAP20,ARHGAP30,ARID4A,ARIH1,ARL4D,ARMC2,ARMC9,ARPC1B,ARSF,ASB9,ATAD2,ATF6B,ATP13A2,ATP1A1,ATP6V0A4,ATP6V0B,ATP6V0D2,ATP6V1H,BAD,BAMBI,BARX2,BAZ1A,BCL2L10,BCL2L14,…
hsa-miR-520g	AADAC,AADAT,AARS2,ABCG2,ABHD11,ACMSD,ADORA2B,ADRA1B,AFM,AGAP10,AGAP9,AIM2,AKAP4,ALOX5AP,ALS2CR11,AMZ2,ANKRD18B,ANKRD44,ANKRD5,APEX1,APOB,APOBEC3H,APOBEC4,ARIH1,ARR3,ASL,ASNA1,ATAD3B,ATAD5,ATL1,ATP5S,ATP6V0A4,B4GALNT3,BAMBI,BCL3,BHMT2,BPHL,BRAP,BRD3,BSND,BSPRY,C10orf107,C10orf137,C10orf58,C11orf54,C11orf73,C11orf74,C14orf177,C15orf29,C15orf40,C17orf58,C19orf20,C19orf45,C19orf56,C21orf2,C2orf40,C3A…
hsa-miR-520h	AADAC,AARS2,ABCG2,ABHD11,ACMSD,ADORA2B,ADRA1B,AFM,AHRR,ALOX5AP,ALS2CR11,AMZ2,ANKLE2,ANKRD18B,ANKRD44,ANKRD5,APEX1,APOB,APOBEC3H,APOBEC4,ARIH1,ARMCX2,ASL,ATAD3B,ATL1,ATP5S,B2M,B4GALNT3,BAMBI,BCL3,BPHL,BRCA2,BRD3,BSND,BSPRY,BUB3,C10orf107,C10orf137,C11orf30,C11orf31,C11orf54,C11orf73,C11orf74,C11orf82,C11orf88,C12orf44,C12orf5,C14orf177,C15orf29,C15orf40,C17orf58,C19orf56,C21orf2,C2orf40,C3AR1,C3or…
hsa-miR-521	A2LD1,A4GALT,ABCC2,ABCF2,ABHD5,ABLIM2,ABTB1,ACSF3,ADCK4,ADRM1,ALG12,ALPK2,ANK3,ANKRD17,ANKRD22,ANO10,ANO2,AP2S1,ARHGEF35,ARR3,ASB10,ATP10A,ATP5D,ATP5G1,ATP5S,ATP6V0D1,ATRIP,BANP,BCL2L14,BMP3,BRD9,BZRAP1,C15orf26,C16orf53,C17orf79,C17orf99,C1QL2,C1orf100,C1orf101,C1orf177,C2orf82,C6orf130,C8G,C8orf47,C9orf153,CABLES1,CABLES2,CACNB2,CASP14,CCDC102B,CCDC90B,CCND2,CCNDBP1,CCNE1,CD164L2,CDH11,CDS2,CEP…
hsa-miR-522	AADAT,ABHD3,ACAD9,ACAT2,ACCS,ACSM5,ACYP2,ADCK2,AGPHD1,ALS2CR11,ANKRD22,ANKRD44,ANKRD9,ANO1,APH1A,AQP9,ARMCX1,ARMCX2,ARPC5L,AURKC,BAG6,BANF1,BCAR1,BPIFA1,BRAP,BUB1B,BZW2,C12orf41,C12orf66,C15orf44,C19orf2,C1D,C5orf45,C6orf120,C7orf11,C7orf58,C9orf153,C9orf84,CA3,CASKIN1,CBLL1,CCDC138,CCDC62,CECR2,CHGB,CHST1,CIR1,CNOT2,COPS3,CRYM,CSDE1,CSPG5,CXorf30,CYFIP1,DGKE,DHH,DHRS12,DIAPH2,DIMT1,DMRTA1,DNAH7,…
hsa-miR-523	A4GALT,AATF,ACCS,ACTR2,ADPRHL1,ADSS,AOC2,AQP8,ARHGEF35,ARL6IP1,ARPC5L,ATP5G1,ATP6V0E1,ATPAF2,AVEN,AXIN2,BCL2L14,BCOR,BRD3,BRD9,C10orf93,C11orf95,C15orf26,C16orf53,C16orf61,C17orf79,C19orf22,C1GALT1C1,C1QA,C1orf228,C20orf43,C3orf39,C3orf49,C7orf31,C8orf47,C9orf40,C9orf43,CACNG2,CASP14,CBS,CCDC28B,CCDC60,CCL26,CCNE1,CCR2,CDH20,CDHR3,CDKN2D,CENPM,CFP,CHADL,CHD1L,CMAS,CMTM4,CNTRL,COG8,COL14A1,CRYAA,C…
hsa-miR-524-3p	AATF,ABHD5,ABLIM1,ACADVL,ACOT7,ACOX3,ACP6,ACSS1,ADAM15,ADAM33,ADAMTS13,ADAMTS6,ADAMTSL2,ADH5,ADRA1A,ADRBK1,AFAP1,AGBL4,AGXT2,AGXT2L1,AIF1L,ANKHD1,ANKRD58,AP1M1,AP2A1,AP4M1,APBA3,APH1B,ARHGAP39,ARHGAP40,ARHGEF40,ARPC1B,ASCC2,ASGR1,ASPA,ATP1A1,ATP2C1,B3GALT6,B3GAT1,BAI2,BARX2,BAX,BCL2L10,BCMO1,C10orf35,C10orf57,C10orf93,C11orf82,C11orf84,C16orf74,C17orf101,C17orf80,C19orf40,C1QTNF4,C1orf135,C1orf17…
hsa-miR-524-5p	ABLIM1,ABRA,ACADS,ADAMTS16,ADAMTSL1,ADRA1A,ADRBK1,ALDH1A1,ALMS1,ALPK1,AMIGO2,ANKIB1,ANKRD13D,AP2A1,AP2M1,AQR,ARHGAP33,ARHGDIB,ASPA,ATG16L2,ATP1A1,ATP5L,ATXN2,AURKC,AUTS2,BAX,BBOX1,BCAR3,BCMO1,BEST2,BSDC1,C10orf35,C10orf96,C11orf58,C14orf149,C17orf79,C18orf10,C19orf57,C1D,C1orf101,C1orf135,C1orf35,C1orf65,C22orf40,C2orf89,C3orf67,C6orf204,C7orf10,C7orf59,C7orf64,C9orf4,C9orf41,C9orf43,CABIN1,CACNB…
hsa-miR-525-3p	AATF,ABHD16B,ABHD5,ABTB1,ACADVL,ACHE,ACOT7,ACOX3,ACP6,ACTL6B,ADAM15,ADAM23,ADAM33,ADAMTSL1,ADAMTSL2,ADH5,AFAP1,AGBL4,AGXT,AGXT2,AGXT2L1,AHSG,AIF1L,ANKRD58,ANXA5,ANXA8,ANXA8L1,ANXA8L2,AP1M1,AP4M1,APBA3,APH1B,APLNR,APRT,ARAF,ARHGAP39,ARHGAP40,ARHGEF1,ARIH2,ARPC1B,ASCC1,ASCC2,ASGR1,ASPA,ASPH,ASPRV1,ATP2C1,ATP4A,ATP6V1B2,AUH,B3GALT6,B3GAT1,BACE2,BAG1,BAI2,BAIAP2,BAIAP2L2,BANF2,BARX2,BAX,BCL2L10,BEST2…
hsa-miR-525-5p	ABCA3,ABCF3,ABTB1,ACCN1,ACHE,ADAM15,ADAMTS13,ALPK1,ALPL,AMICA1,ANKZF1,ANO7,AOX1,AP2M1,AP3B2,APEH,APOA1BP,APOBEC1,AQP9,ARAF,ARFGEF1,ARHGAP22,ARHGEF1,ARHGEF40,ARL4D,ASPH,ATP4A,ATP5D,ATP5SL,B9D2,BAD,BAG1,BAIAP2,BANF2,BAX,BCL3,BIRC7,BMPER,BRAT1,BST2,C10orf28,C11orf86,C12orf11,C12orf68,C14orf135,C14orf159,C15orf55,C16orf74,C16orf78,C17orf47,C19orf28,C19orf56,C1orf31,C1orf35,C1orf43,C1orf54,C1orf85,C20…
hsa-miR-526b	ABCC11,ACADVL,ACBD5,ACP2,ACSL6,ACTA1,ADAM15,ADAM28,AIFM3,AKIRIN1,AKR1B1,ALDH1L2,ALG1L,ALS2CR8,AMIGO3,ANKRD42,ANKUB1,AP1M1,ARHGAP9,ARHGEF16,ARID5A,ATAD5,ATG2B,ATP2C2,ATP4A,ATRNL1,ATXN7L2,BAD,BATF3,BLVRA,BMP1,BMS1,BPI,BPY2,BRCA1,C10orf125,C10orf2,C10orf27,C12orf40,C14orf80,C15orf33,C16orf52,C17orf75,C1orf100,C22orf32,C2orf28,C6orf115,C6orf118,C8orf84,C9orf9,CA1,CACNA1D,CALCA,CCDC134,CCL28,CD163,CD3…
hsa-miR-526b_star	AADAC,ADRA1B,AGPAT4,ANKRD44,BAX,BSND,C20orf26,C6orf48,CBWD1,CCDC90B,CCNA1,CCS,CNN1,DDOST,DHX9,ENSA,FGL2,GPRASP1,HIST1H3D,HN1,HRH2,KIDINS220,LSM7,LTB4R,MOV10L1,MRPL24,OLFM3,ORAI1,PRR15,PTPN4,RGN,RQCD1,SH3BGR,SLC13A3,SLC46A3,SORL1,SOS1,SVOPL,TNRC18,TOPORS,TRIP11,VLDLR,WDR19,ZCCHC7,ZNF239,ZNF791
hsa-miR-532-3p	ABHD14B,ACBD4,ACRBP,ADAMTS13,ADORA1,AFG3L2,AHSG,AMICA1,AMIGO3,ANKRD22,APH1A,APTX,ARAP1,ARHGAP30,ARHGAP33,ARR3,ARVCF,ASPG,ATG4D,ATP6V1H,ATPAF1-AS1,AZGP1,B3GNT8,B4GALT2,BEST1,BOD1,BPHL,BPIFB3,BRF2,BRSK1,BST2,BTK,C10orf129,C16orf89,C17orf74,C19orf33,C1orf192,C20orf203,C21orf33,C2orf80,C3orf80,C6orf132,C6orf154,C9orf71,CABP5,CACNG5,CACNG6,CARHSP1,CASKIN2,CCBL1,CCDC78,CCHCR1,CCR10,CCR7,CD164L2,CD7,CD7…
hsa-miR-532-5p	AAAS,ABCA3,ACAA1,ACBD4,ADCY5,ADM,ADSL,AGBL5,AHSG,AKNA,ALPK1,AMBN,ANAPC10,ARHGAP25,ARID5A,ATP6V1D,AVEN,AVL9,B3GAT3,BCAS2,BCL2L11,BCMO1,BCS1L,BLZF1,BMX,BRF2,BST1,BST2,C10orf35,C11orf31,C12orf62,C14orf37,C16orf89,C17orf50,C17orf74,C1orf68,C1orf85,C20orf132,C20orf203,C22orf23,C5orf32,C8G,C8orf47,C9orf129,C9orf43,C9orf68,CALN1,CAMK2D,CARS2,CASP10,CASP14,CAST,CD164L2,CD40LG,CD70,CDHR4,CDK9,CDO1,CECR5,C…
hsa-miR-539	ABCC2,ACTR5,ADH5,ADNP2,ADPGK,ADRA1B,ADRA1D,AHSA1,ALPL,ANXA1,APOM,APOOL,ARID4A,ATAD5,ATAT1,ATP2C2,ATP6V0E1,AVIL,BATF,BBOX1,BPIFB2,BTLA,BTNL9,BUB3,C12orf26,C12orf62,C13orf26,C19orf2,C20orf165,C5orf32,CABLES1,CARD11,CAST,CATSPERB,CCDC147,CCDC148,CCDC84,CD37,CEP78,CHI3L1,CLNK,CLRN3,CNGA1,CNKSR1,CNTNAP4,COG1,COL6A5,COQ5,CPT1B,CREB3L4,CRY1,CSRP1,CSRP2,CTDP1,CYHR1,DAB2,DBC1,DDX25,DENND1C,DFNA5,DHRS1,DIS…
hsa-miR-541	ABCC10,ADC,ALX3,ANAPC2,ANGPT4,ANKS1B,ANO10,AP3S1,APBA3,ASB16,ASPSCR1,ATG2A,ATP13A1,ATP4A,ATP6V0A4,ATP6V0C,AVPR1B,B3GNT1,BACE2,BAD,BIRC7,BPNT1,BSPRY,C10orf71,C11orf91,C12orf51,C12orf52,C14orf102,C19orf35,C1QL1,C1orf172,C20orf151,C20orf29,C20orf46,C2CD3,C6orf211,CABP2,CABP4,CALCA,CAMLG,CATSPER1,CC2D1A,CCDC106,CCDC135,CCDC22,CCDC69,CCL17,CD300LG,CD79B,CDH24,CDIPT,CDK5RAP3,CDT1,CDY1B,CELSR2,CENPH,CEN…
hsa-miR-541_star	AADAC,ADRA1A,AKNAD1,AKR1B1,ALKBH1,ALMS1,ANXA9,ARL5C,ATP5J2,BCL2L11,C14orf142,C16orf61,C1orf101,CAPRIN2,CCL26,CDK9,CHST11,CISD2,CNOT1,COL1A2,COX7A2,CPA3,DHX38,DIABLO,FAM118B,FAM20A,FAM78B,FEV,FHOD1,FLYWCH2,GIMAP1,GNRH1,ICAM4,KCNK16,KRT10,LMTK3,MACROD2,MAGED1,MBD3L1,MIA2,MNAT1,MSRA,NR2C2,NT5C3L,NUDT2,OLFML3,PADI6,PGM3,PPP1CA,RCC1,REG4,RIN1,RNF217,RSBN1L,S100Z,SCN9A,SELPLG,SETX,SLC46A3,SLU7,SMAD5-AS…
hsa-miR-542-3p	AARSD1,ABCF2,ACAD10,ACP5,ACTG2,ADAMTSL1,AFM,AHI1,AHR,AHSG,AKAP10,AKR7A2,ALCAM,ALKBH4,AMIGO2,ANGPTL2,ANKLE2,ANKRD27,APBB2,APLF,APOL5,AQR,ARFGAP3,ARHGDIB,ARHGEF26,ARPC1A,ARPC5,ASH2L,ATP13A5,ATP1B1,ATP6V0D2,BABAM1,BAMBI,BATF,BCAM,BDKRB1,BMS1,BMX,BNIP2,BRK1,C10orf93,C11orf30,C14orf166,C22orf15,C6orf141,C6orf228,C9orf93,CALM1,CALY,CASS4,CBS,CCBP2,CCDC77,CCDC90B,CCDC94,CD180,CD300LD,CD37,CD58,CDC16,CDK…
hsa-miR-542-5p	AANAT,ACAA2,ACOXL,ACP6,ADCK4,ADD1,AGER,ALDH1A1,ALDH1L1,ANAPC11,ANK1,ANKRD9,ANO7,APCDD1,AQP8,ARAP3,ARF5,ARHGEF38,ART1,ARTN,ASIP,ASS1,ATF3,ATOH1,ATOH8,ATP6AP1,BABAM1,BAG2,BAX,C10orf116,C11orf85,C11orf86,C19orf48,C19orf53,C19orf69,C1orf159,C20orf4,C3orf39,C6orf145,C7orf50,C9orf23,C9orf9,CAPZA3,CASP9,CATSPER4,CCDC42,CCDC58,CCDC80,CCDC94,CCNDBP1,CCNG2,CCNO,CD109,CD22,CD9,CDCP2,CDHR4,CEACAM21,CENPV,CHM…
hsa-miR-543	AARSD1,ABHD12B,ACSF3,ACSM1,ACTR10,ADAM10,ADCK3,ADHFE1,AGBL4,AGXT,AHRR,AIFM1,ALDH9A1,ANKRD62P1,ANXA13,APOL4,ARHGAP12,ARHGEF10L,ARL17A,ARL9,ARMC4,ARMC6,ARPC1B,ART1,ASB3,AVL9,BBOX1,BOLA1,BPY2,BRK1,BTK,C10orf116,C11orf30,C12orf51,C12orf56,C12orf73,C16orf71,C16orf95,C18orf55,C1QB,C1orf131,C1orf134,C20orf24,C20orf85,C22orf28,C2orf29,C4orf47,C6orf115,C6orf126,C6orf130,C7orf46,C8orf4,C9orf71,CACNB2,CAMKM…
hsa-miR-544	ACAD8,ACCS,ACLY,ACVR2B,ADAMTSL1,AGPAT3,AKIRIN2,ALG13,ALG6,ALKBH2,ALMS1,ANGPTL1,ANKRD1,APOL3,ARPC2,ASS1,ATP12A,ATP6V1H,ATXN7L1,AZGP1,BATF,C10orf68,C12orf50,C14orf105,C14orf149,C15orf26,C16orf48,C18orf55,C1orf100,C20orf187,CACNA1G,CALCA,CAMK2B,CBLN4,CC2D2B,CCDC147,CCDC39,CCNI,CD40,CD40LG,CDK20,CDK7,CDX2,CGRRF1,CHCHD1,CHN2,CLCN6,CLSPN,CNTRL,COL11A1,COPS2,CPEB2,CREBL2,CRYAA,CSDE1,CSF2RA,CSNK2A2,CUEDC…
hsa-miR-545	ABCA6,ABHD6,ADAMTS6,ADH7,ADHFE1,AIM1L,AKNAD1,AMDHD1,ANKRD13C,ANKRD7,ARGLU1,ARID1B,ARL13A,ARMC4,ARPC1B,ARPC5L,ASB7,ASXL1,ATAD5,ATG10,ATP12A,AURKA,BAI3,BANP,BEND5,BET3L,BRWD1,BSND,C10orf122,C11orf63,C12orf28,C12orf44,C12orf48,C12orf62,C15orf26,C15orf55,C18orf55,C1QTNF9B,C2orf42,C3orf38,C3orf67,C5,C6orf48,C7orf46,C7orf53,C9orf71,CALCB,CANT1,CBWD5,CC2D2A,CCDC110,CCDC34,CCDC58,CCDC99,CDY2B,CEBPZ,CHAMP…
hsa-miR-545_star	AKAP14,AKNAD1,AMDHD1,ANAPC10,ANKRD53,ARAF,ARG1,ASPHD1,ATAD5,ATP12A,B4GALNT3,BAMBI,BCCIP,C12orf28,C12orf44,C19orf12,C22orf40,C3orf54,CBWD1,CBWD3,CBWD5,CBWD6,CCM2,CDKL3,CEACAM3,CENPJ,CKAP2,CLEC4A,CNOT10,CNPY2,COMMD6,COX5A,DCUN1D2,DDX54,DLEU7,DOPEY2,DUSP8,DZIP1L,EFCAB4B,ESF1,FAM162B,FGG,FNBP4,FOXP2,FREM1,GLIPR1L1,GLMN,HCFC2,HDAC9,HIBCH,HOXA13,IL10,IL20,INTU,IVNS1ABP,KCNN2,LBP,LHX9,LIG1,LRFN5,LRMP,ME…
hsa-miR-548a-3p	ABCA10,ABCC2,ABCD2,ACBD5,ACN9,ACOX3,ACTC1,ACTR6,ADAMTSL3,ADH7,ADPRHL2,ADSS,AEN,AGBL4,AGMO,AGPAT1,AGR3,AGTPBP1,AGXT2L1,AHDC1,AHNAK,AHSP,AKR1B1,ALG10,ALG13,AMPH,ANGPTL1,ANKDD1A,ANKRD44,ANKRD5,ANKRD55,ANKRD57,ANKRD6,ANUBL1,APBA2,APOL4,AQP11,ARAF,ARHGAP21,ARHGAP29,ARHGEF16,ARHGEF26,ARMCX5,ASPM,ATF2,ATG16L2,ATL1,ATL2,ATP2C2,ATP5A1,ATP6V0B,ATP6V1G3,ATP9A,ATXN10,B3GALT1,B3GALT5,BAI3,BCCIP,BDP1,BEX2,BEX4…
hsa-miR-548a-5p	AADAT,ACADL,ACAT1,ACAT2,ACBD5,ACO2,ACTL8,ACTN4,ADAD1,ADK,ADRA1A,ADSS,AFTPH,AGTPBP1,AHDC1,AHSA2,AKAP10,AKNAD1,AKR7A2,ALG10,ALG10B,ALMS1,ALS2,AMELY,ANAPC1,ANGEL2,ANKRD10,ANKRD5,ANXA13,APOB,AREGB,ARL17A,ASB3,ASH1L,ASTE1,ASZ1,ATP2C1,ATXN2,AVL9,AZI1,B2M,B3GALNT2,BAMBI,BBOX1,BBS2,BEX4,BMS1,BOC,BRDT,BRI3,BRIX1,C10orf107,C10orf81,C10orf90,C12orf26,C12orf35,C12orf48,C12orf51,C13orf27,C14orf149,C14orf49,C1…
hsa-miR-548b-3p	AACS,ABCA10,ABCB11,ABCC4,ABI1,ACO2,ACOX3,ACYP1,AHNAK,AHR,AIM1,AKNAD1,AKT1,ALG10,ALKBH2,ALPK1,ANGPT1,ANKRD34B,ANKRD5,ANP32B,APBA3,APBB1,APOL4,APOM,AQP8,ARAF,ARG2,ARHGAP33,ARMCX2,ARPC2,ARX,ASB7,ASPG,ASPH,ASTL,ASTN2,ATF2,ATG4A,ATP1A1,ATRNL1,ATXN7L1,B3GALNT1,B3GNT4,BAZ1A,BBS2,BCCIP,BIK,BIRC7,BLVRA,BPGM,BTF3,BTNL3,C12orf23,C12orf34,C12orf42,C12orf45,C12orf51,C12orf60,C12orf68,C13orf27,C14orf133,C14orf…
hsa-miR-548b-5p	ABCB7,ACADL,ACAT2,ACBD5,ACN9,ACO2,ACTL8,ACTR6,ADAM30,ADAMTS20,ADD1,ADSS,AFTPH,AHDC1,AHSA2,AKD1,AKR7A2,ALG10,ALG10B,ALMS1,ALOX5AP,ALS2,AMELX,ANAPC1,ANAPC10,ANGEL2,ANGPTL1,ANKRD10,ANKRD5,ANKS4B,ANP32B,ANXA13,ANXA3,APOB,APOM,AREGB,ARL14,ARL17A,AS3MT,ASB1,ASB3,ASTE1,ASZ1,ATG9B,ATL1,ATP2C1,ATXN2,AVL9,B3GALNT2,BAI3,BATF,BBOX1,BMS1,BRDT,BRI3,BRIX1,BTF3,BTG3,C10orf107,C10orf137,C10orf81,C11orf63,C12orf11…
hsa-miR-548c-3p	AASDH,ABCA10,ABI1,ACSL5,ACYP1,ADAM22,ADAM23,ADAMTS2,ADC,ADH7,ADNP2,ADRA1A,AFAP1L2,AFM,AGR3,AGT,ALG10,ALG8,ALPK1,AMELX,ANGPTL5,ANKRD10,ANKRD34B,ANKRD5,ANP32B,ANUBL1,AOC2,AP3S1,APH1A,AQP11,AREGB,ARF6,ARG1,ARHGAP10,ARHGAP12,ARHGAP15,ARL17A,ARL9,ARMC4,ARMCX1,ARMCX5,ASB11,ASB3,ASB4,ASPHD2,ASPM,ATG2B,ATG4A,ATG4C,ATP1A1,ATP2C2,ATRNL1,AUTS2,B3GALNT1,BABAM1,BEND5,BEST2,BIRC2,BMPR1A,BRD1,BTBD16,BTG1,BTNL3,…
hsa-miR-548c-5p	ACAT2,ACBD5,ACO2,ACTL8,ADAD1,ADSS,AFTPH,AHDC1,AHSA2,AKAP10,AKR7A2,ALG10,ALG10B,ALKBH2,ALMS1,ALS2,AMELY,ANAPC1,ANGEL2,ANGPTL5,ANKRD10,ANKRD26,ANKRD5,ANKS4B,ANXA13,ANXA3,APOB,AREGB,ARL14,ARL17A,ARSJ,AS3MT,ASB1,ASB3,ASTE1,ASZ1,ATG9B,ATL1,ATP2C1,ATXN2,AVL9,AZI1,B3GALNT2,BAMBI,BATF,BBOX1,BBS2,BMP2,BMS1,BOC,BRI3,BRIX1,BTG3,C10orf107,C12orf26,C12orf35,C12orf48,C12orf51,C14orf149,C14orf49,C15orf26,C15orf…
hsa-miR-548d-3p	AADACL2,ABCA10,ABI1,ACADL,ACN9,ACOX3,ACYP1,ADC,ADORA2B,AGPAT3,AGTPBP1,AHR,AHSP,AKAP17A,AKR1C1,AKR7A2,AKT2,ALG10,ALKBH2,ALS2,AMELX,ANKRD34B,ANKRD5,ANP32B,ANUBL1,APOA1BP,APOBEC2,APOL4,AQP8,ARG2,ARHGAP21,ARHGAP33,ARHGEF16,ARSJ,ASB1,ASB11,ASH1L,ATF2,ATP1A1,ATP5F1,ATP6V0B,ATRNL1,AUP1,AZI1,B3GALNT1,B3GAT3,B3GNT4,BAG3,BARX2,BAZ1A,BBS2,BCR,BEX2,BIRC5,BIRC7,BMPR1A,BPI,BPIFC,BRD8,BTBD16,C11orf85,C12orf11,C…
hsa-miR-548d-5p	ACAT2,ACBD5,ACO2,ACTL8,ADAD1,ADAMTS20,ADD1,ADSS,AFTPH,AHDC1,AHSA2,AKAP10,AKR7A2,ALG10,ALG10B,ALMS1,ALOX5AP,ALS2,ANAPC1,ANGEL2,ANKRD10,ANKRD26,ANKRD5,ANKS4B,ANP32B,ANXA13,ANXA3,APEX1,APOB,AREGB,ARF4,ARL17A,ARSJ,AS3MT,ASB1,ASB3,ASPH,ASTE1,ASZ1,ATG9B,ATL1,ATP2C1,ATXN2,AVL9,AVPR1A,B3GALNT2,BATF,BBOX1,BBS2,BMS1,BOC,BRI3,BRIX1,BTG3,C10orf107,C10orf137,C10orf81,C11orf63,C12orf26,C12orf35,C12orf48,C14orf…
hsa-miR-549	A2M,ACADS,ACER3,ACPP,ADD1,AFAP1L2,AGBL4,AIMP2,ALAS1,ALX1,ANKRD26,ANKRD53,ANKRD58,AOX1,AP3S1,APAF1,ARHGAP5,ATOH1,ATP5F1,ATP6AP1L,ATP8A2,AXDND1,BAG2,BCAP31,BCL2L11,BNC2,BRAP,C14orf1,C14orf118,C15orf43,C16orf62,C16orf74,C16orf95,C1GALT1C1,C1R,C1orf122,C1orf162,C1orf177,C1orf55,C20orf103,C8B,CACNG1,CACNG3,CAPN13,CARS,CCDC73,CCL26,CCNL1,CCT2,CD36,CD84,CDC25C,CDH6,CDK2AP2,CEP135,CHAMP1,CHST9,CLGN,CNGA4…
hsa-miR-550	AADAC,AASS,ABCA3,ABCD1,ABHD11,ACRV1,ADAM15,ADPRH,AGAP3,AIG1,ALG12,ALKBH1,ANKIB1,ANKMY1,ANO7,AP1M1,ARHGAP10,ARHGAP22,ARHGEF25,ARIH2,ASB1,ATP13A2,ATP2A1,B3GAT3,B3GNTL1,BAD,BARX1,BCL3,BGLAP,BMPR1B,BZW2,C10orf71,C11orf95,C12orf45,C12orf59,C14orf159,C19orf44,C20orf26,C20orf85,C22orf23,C2orf42,C4orf37,C7,C8orf48,CACNG3,CACNG8,CBX2,CBY1,CCDC13,CCL27,CCRL2,CD164L2,CD2BP2,CDK13,CIC,CMTM7,COL16A1,COL4A2,CO…
hsa-miR-550_star	ADRA1A,AIM1,AKNA,ALX1,ANKS3,APOA4,ART1,ATXN2L,C11orf9,C1orf94,C6orf72,CDK5,CLDN10,CLIC1,COL27A1,CPXCR1,CRH,CRP,CRTAC1,CSF2RA,DAP3,DBF4,DYRK1B,ERAS,FAM149A,FAM178A,FAM206A,FBXO36,GLS2,GNG4,GPR162,GPSM3,GUSBP3,HADHA,KCNF1,KCNH6,KIAA1217,KIDINS220,KLRC4,KY,LGSN,LINGO2,MORC4,MRPS16,MRPS18A,MST1,MTA2,MTNR1B,MYOD1,NIF3L1,NME5,OR10A5,OR3A3,PAK3,PARP14,PHF7,PLAUR,PRKCB,PSMB7,RASGEF1B,RNGTT,ROM1,RRM1,RSPH…
hsa-miR-551a	ACAA1,ACE,ACIN1,ACRBP,ADAMTS10,ADRM1,AFG3L2,ALDH2,ALDH4A1,ALOX5,ALPK1,AMDHD2,ANGPTL4,APBB1,APOBEC3A,APTX,AQP7,ATG16L2,ATP2A1,ATP5L,ATP6V0D1,ATP9A,B4GALNT2,BATF,BCAR1,BCL3,BIRC7,BPIFA4P,BPIFB1,BTN1A1,C10orf2,C12orf44,C19orf52,C20orf27,C22orf42,C2orf62,C4orf19,C6orf145,C6orf164,C7orf25,C7orf59,C9orf16,CACNG6,CADM4,CAMK2A,CARD14,CARHSP1,CCDC37,CCDC60,CD164L2,CDK15,CEACAM3,CELF5,CFH,CHST11,CIDEC,CITE…
hsa-miR-551b	ABCC3,ACAA1,ACE,ACER2,ACIN1,ACRBP,ACY3,AFG3L2,AGRP,AHNAK,ALDH2,ALDH4A1,ALOX5,ALPK1,ANGPTL4,ANO8,APBB1,APTX,AQP7,ARHGAP33,ARMC6,ATG16L2,ATP2A1,ATP5L,ATP6V0D1,ATP9A,B4GALNT2,BATF,BCAR1,BPIFB1,BST2,C12orf44,C14orf166B,C19orf52,C20orf27,C2orf62,C6orf126,C6orf145,C7orf25,C7orf59,C9orf16,C9orf174,CACNG6,CANT1,CARHSP1,CCDC136,CCDC3,CCDC37,CCDC60,CD164L2,CDK10,CDK15,CEACAM3,CELF5,CFH,CFLAR,CHCHD1,CHST11,…
hsa-miR-551b_star	ADC,ANKRD42,BNIP1,C20orf112,C4orf6,C5orf22,C6orf123,CCDC66,CCNB2,CCNL1,CPZ,DYM,EHBP1,ENPP2,FAM115C,FAM172BP,FAM40A,FAM72B,FGA,GKN1,GPRIN2,GRHPR,HSD17B7,IMMT,KLK6,KRT6C,MED31,MRPS30,NDUFA9,OR4N2,PBXIP1,PCDH8,PLP2,PPAP2A,PSMC4,PTPRD,RBBP7,REP15,SAMD4A,SEC61B,SENP3,SIKE1,SLC26A5,TACC2,TMEM170A,TMEM2,TSSK1B,VTI1B,ZDHHC17,ZNF638
hsa-miR-552	ABCC8,ABHD12B,ACOT12,ACOX3,ACSBG2,ACTN1,ADHFE1,AFM,AGER,AKAP10,ALDH6A1,APOA4,ARHGAP8,ASRGL1,ATG4D,ATN1,ATP4A,ATP6V0B,ATP9A,BATF3,BEX1,BICC1,BOC,BPI,BRP44L,BTBD11,C10orf95,C11orf52,C12orf60,C15orf33,C17orf101,C17orf59,C17orf62,C18orf34,C19orf53,C1S,C21orf58,C2orf54,C4orf37,C5orf45,C7orf59,CALCA,CARD10,CASP6,CAST,CCDC135,CCL1,CD82,CD97,CENPC1,CFLAR,CHD1L,CHD9,CHMP4B,CHST8,CLPS,COL9A3,COMMD7,COX5A,C…
hsa-miR-553	AASDHPPT,ACAP2,ACTR2,ADAM20,ADAMTSL1,AGPHD1,AHR,ALG6,ANO8,ANXA10,APBB1IP,APBB3,ARHGAP1,ASB1,ASB5,ATIC,ATP12A,ATP5C1,ATP5E,ATP6V1H,AVL9,BAG6,BAI1,BARD1,BAZ2B,BLZF1,BRI3,BTBD10,C10orf82,C11orf82,C12orf48,C12orf5,C14orf109,C15orf40,C15orf61,C17orf39,C17orf48,C17orf81,C1orf131,C1orf141,C1orf21,C3orf64,C5orf13,C6orf165,C6orf203,C7orf11,C7orf46,C9orf46,C9orf84,CA3,CASP6,CBLL1,CCDC23,CCDC90A,CD164,CDH4,…
hsa-miR-554	AARS2,ABCF3,ABL1,ACACB,ACIN1,ACOT12,ACOX3,ADAD2,ADAM15,ADAMTS8,AEBP2,AGRP,AIFM3,AMN,ANAPC11,ANKS3,ANKZF1,APOA1BP,ARHGAP33,ARHGEF26,ARVCF,ASL,ATG16L2,AVPR1B,BCKDHA,BEST4,BIK,BMS1,BRAT1,BTBD17,BTBD2,BZRAP1,C10orf81,C11orf53,C17orf72,C19orf45,C19orf51,C19orf71,C1orf123,C1orf94,C22orf31,C5orf45,C6orf27,C7orf51,C8orf74,C9orf142,C9orf24,CACNB3,CAPZB,CARD11,CARS,CASKIN2,CASP9,CBY3,CCDC12,CCDC33,CCDC81,C…
hsa-miR-555	ALOX5AP,AMN,AMT,ANAPC1,APOH,ARFGEF1,ARHGAP32,ARHGDIB,ARID1A,ARL17A,ART1,ASPA,ATP6V1B1,ATP8B1,ATP9B,BCO2,BEST4,BMS1,BPIFA2,C10orf81,C17orf107,C17orf81,C19orf56,C1orf85,C1orf87,C20orf196,C7orf45,C8B,CACNG7,CAPN12,CASS4,CCDC12,CCDC146,CCDC56,CCDC69,CCT7,CHMP4B,CIDEB,CLNS1A,CLP1,COPG,COPS3,CPAMD8,CRNN,CTNS,CXCL17,DDX50,DEGS2,DHPS,DHRS1,DIABLO,DPAGT1,DPEP1,DRG1,ECH1,EFCAB4B,EIF2B5,EIF3D,ENPP7,F13B,FAM…
hsa-miR-556-3p	ABCA6,ABCC12,ABHD12B,ABHD2,ACOT12,ACOX2,ACSL1,ACSM3,ACTL6B,ADPGK,ADRB2,AFF4,ALKBH3,AMIGO2,AMTN,ANKAR,ANKRD26,ANKRD44,ANO1,ANXA7,AP1AR,APIP,APLP2,AREGB,ARF6,ARL13A,ARL14,ARMCX3,ARPC1B,ARPC2,ASGR1,ASPN,ATP4A,ATP5J,ATP6AP1L,ATP6V1E1,ATXN3L,B4GALT4,BBX,BET3L,BLVRA,BRS3,BUD13,C14orf126,C17orf97,C18orf32,C19orf20,C1orf110,C4BPB,C4orf43,C5orf22,C6orf126,C6orf138,C7orf28B,C7orf43,C8orf47,C9orf131,C9orf29…
hsa-miR-556-5p	A2M,ABHD12B,ACD,ADAD1,ADAMTSL5,ADH7,ADSL,AEBP1,AFF4,AFMID,AGPAT3,AIMP1,AK7,ALMS1,ALOX5,ANAPC10,ANGPTL6,ANKRD20A1,ANKRD20A2,ANKRD20A3,ANKRD20A4,ANXA3,APC,APEH,AQP8,AREGB,ASB11,ASB3,ASPA,ATAD5,ATP13A3,ATP4A,ATP6V1A,ATXN3L,AVPR1A,AXIN2,BAX,BBS2,BCCIP,BET3L,BLNK,C14orf126,C15orf40,C17orf99,C18orf32,C1QA,C1orf101,C1orf105,C1orf172,C20orf46,C2orf47,C4BPA,C6,C7orf58,C7orf63,C9orf68,C9orf85,CALCA,CALHM2,…
hsa-miR-557	ACAA1,ADAM18,ADAMTSL5,ADAT3,ADCK3,ADK,ADRA1D,ADSSL1,AEBP1,AGAP4,AGAP5,AGAP6,AGAP8,AGR3,AHDC1,AKAP1,AKNAD1,ANAPC2,ANKHD1,AP3B2,APTX,ARG1,ARHGAP4,ARID3A,ARRDC2,ASB10,ATF7IP,ATP12A,ATP2A1,ATP9A,AXDND1,B3GALT2,B4GALT7,BATF3,BBS9,BCAR3,BCL6,BEST1,BMP4,BMX,BRD4,BTBD11,BZW2,C10orf122,C10orf93,C10orf99,C14orf102,C15orf48,C16orf74,C19orf59,C19orf80,C1QL2,C1orf162,C20orf26,C2orf43,C5orf32,C6orf125,CACNA1G,…
hsa-miR-558	ABCC5,ABHD3,ABTB1,ADAT1,ADCK2,ADCK5,AFF4,AIG1,AIRE,ANKRD34B,ANKS3,ANXA3,APCS,AQP8,ARHGEF4,ARRB2,ASB3,ASPA,ATF2,ATF3,ATP11C,ATP13A3,ATP2C1,BAIAP2L2,BBX,BIRC5,BMP2K,BRE,C15orf40,C16orf7,C19orf70,C1orf122,C1orf123,C1orf87,C21orf58,C2orf43,C3orf39,C6orf154,C8orf85,C9orf72,C9orf96,CALCB,CAPN13,CBY1,CCDC154,CCDC18,CCDC56,CCDC87,CD320,CD72,CD81,CDH16,CENPV,CEP63,CFDP1,CHTF8,CMKLR1,CNGB1,CNKSR3,COMMD4,CT…
hsa-miR-559	AASS,ABHD5,ABL2,ACO2,ALKBH6,ALMS1,AMELX,ANAPC1,ANKRD5,ANP32B,AP2A1,APBB1IP,ARL6IP6,ASB3,ATOH1,ATOH7,ATP2C1,BAI3,BBS2,BEX4,BOD1,BRDT,BRIX1,BTG3,BTLA,C10orf137,C11orf24,C11orf63,C11orf74,C12orf11,C12orf48,C14orf135,C14orf149,C14orf49,C17orf48,C2orf47,C4BPA,C7orf10,C7orf46,C8orf34,C9orf150,C9orf46,CA1,CCDC90B,CCL26,CCNA2,CCNB1,CCNG2,CCNO,CD9,CDH8,CEP152,CETN3,CFDP1,CHEK2,CHIC2,CHN2,CHST9,CLK1,CNKSR1…
hsa-miR-560	ABCA2,ABCG5,ACTL7A,ACTN1,ADAM15,ADAMTS10,AHSA1,AKT2,ALDH6A1,ANK1,ANKRD24,ANKRD53,APC2,ARHGAP27,ARPC2,ASPDH,ATAD3C,ATOH1,ATP6V0B,ATP6V1E1,AZI1,B3GALT6,B4GALNT3,BEST4,BHLHE23,BRD4,BSX,BTBD2,BUD31,C10orf95,C15orf40,C16orf80,C17orf56,C19orf20,C19orf26,C1QTNF4,C1QTNF8,C21orf56,C2orf82,C3orf80,C4orf29,C5orf38,CALN1,CAMK2B,CAMK2N2,CASP6,CBY3,CCDC142,CCDC63,CCDC78,CCDC85B,CCNYL1,CCT7,CD22,CD7,CD72,CDH20,…
hsa-miR-561	AADAT,ABCB1,ADCK2,AFP,AGR3,AIMP2,AKIRIN1,ALG6,ALOX12,ANKRD37,ANKRD42,AREGB,ARGLU1,ARMC9,ATAD2,ATF1,ATIC,ATOH7,ATP5G1,BACE2,BCCIP,BCL2L12,BPGM,BPI,C11orf63,C14orf109,C14orf133,C14orf135,C16orf62,C17orf62,C18orf21,C19orf21,C19orf39,C1orf141,C2orf47,C7orf11,C8orf42,CACHD1,CALHM2,CALHM3,CASC1,CASP12,CASP9,CATSPER4,CBX5,CCDC12,CCDC152,CCL11,CDC16,CECR2,CEP290,CETN2,CHD1L,CHD7,CHRNA5,CKS1B,CLCA1,CLEC2A…
hsa-miR-562	ABCC11,ABCC9,ACOX3,ACVR2B,ADAMTSL1,ADORA2B,AKAP5,ALG8,AMBN,ANUBL1,AP1S1,AP3B2,APBB2,ARFGAP3,ARHGEF26,ARID4B,ASB3,ASL,ATOH7,AVIL,B3GAT3,BBS2,BEST3,BLZF1,BRAP,BRIX1,C12orf24,C12orf65,C14orf149,C14orf159,C15orf23,C15orf29,C15orf48,C17orf75,C20orf46,C2orf80,C6orf72,C7orf62,C8orf47,C9orf46,C9orf80,C9orf89,CALR3,CASP6,CCBL2,CCDC107,CCDC22,CCDC58,CCDC74A,CCDC89,CCL20,CCL26,CCNE1,CCNT2,CD58,CD9,CDH17,CDK…
hsa-miR-563	ABHD16B,ABI3,ABLIM2,ACAT1,ACSM3,ACSS2,ADAM29,AKAP4,AKIP1,ALOX5AP,AMN,ANKRD13A,ANKRD58,AP4S1,ARL2,ART1,ASNS,ASPRV1,ATP11C,ATP6V1E2,ATPAF2,BBOX1,BCKDHA,BHLHB9,BPIFB4,BSCL2,C10orf107,C10orf116,C10orf96,C11orf53,C12orf56,C14orf48,C15orf24,C17orf81,C18orf21,C1orf112,C1orf131,C1orf162,C1orf50,C20orf132,C20orf7,C2orf15,C5orf45,C6orf145,C6orf99,C7,C9orf114,CADPS,CAGE1,CARM1,CBLL1,CCDC116,CCDC129,CCDC13,C…
hsa-miR-564	AATF,ABCA7,ABHD8,ACADS,ACADVL,ACE,ADAMTS10,ADAT3,ADCK4,AGPHD1,ALDH3A1,AMN,ANAPC2,ANGEL1,ANKRD54,ANO7,APBA3,APH1B,APOD,ARHGAP44,ARHGEF1,ARHGEF16,ARHGEF26,ATN1,ATP2C2,ATP6V0B,ATXN7L3,AVPR2,B4GALNT4,BCAN,BCAR1,BEST2,BLK,BMS1,BRSK1,C10orf62,C10orf71,C11orf82,C14orf102,C16orf59,C17orf39,C19orf53,C1orf159,C1orf85,C21orf62,C3orf39,C6orf192,C7orf43,C9orf23,CAPNS1,CARD10,CARD14,CCDC18,CCDC42,CCDC78,CCDC90…
hsa-miR-565	ABCA1,ABCA2,ABCA3,ABCC3,ACO1,ADAMTS14,ADORA3,AFG3L2,ALAS2,ANGPT4,ANKRD1,ANKRD2,ANKS3,ANPEP,AP1M1,APOB,AQP10,ARHGAP22,ARHGAP6,ARL4C,ARMC6,ASCC2,ATP1A4,ATP5D,ATP5S,ATP8B3,B3GNTL1,BAI1,BAI2,BATF3,BCKDHA,BIN3,BMX,BPIFB2,C10orf93,C11orf24,C11orf49,C19orf48,C1orf228,C1orf50,C1orf85,C22orf24,C22orf40,C2orf68,C3orf25,C5orf50,C6orf132,C6orf136,C7orf64,C9orf23,C9orf68,CABP7,CACNG1,CALHM3,CAPN10,CAPN12,CARM…
hsa-miR-566	A4GALT,ACAA1,ADAM15,ADAMTS13,ADAT3,ADCK3,ADM,ADRA1B,AFMID,AGAP2,AGAP3,AGPHD1,AGXT2L1,ANGEL2,ANGPTL4,ANKS3,AQP6,ARHGAP22,ARMC6,ASB1,ASIP,ASPSCR1,ASS1,ATP6V1B1,ATP8B3,ATPAF2,AVPR2,BAD,BCAS4,BCKDHB,BCL2L13,BEST2,BST1,BTBD17,C10orf116,C10orf82,C10orf93,C11orf31,C11orf83,C12orf63,C15orf58,C19orf18,C19orf20,C19orf35,C19orf53,C19orf63,C19orf80,C1QTNF6,C1orf111,C1orf159,C1orf170,C1orf52,C20orf165,C2orf66…
hsa-miR-567	ABCC2,ABCC9,ABHD6,ADAM23,ADCY8,AFTPH,AGPAT5,AKIRIN2,AMTN,ANAPC10,ANAPC2,ANKLE2,ANKRD44,AP3M2,APOL2,ARMC4,ATG5,ATP13A4,ATP2A2,AURKA,AXDND1,B3GNT8,BIRC3,C10orf128,C12orf11,C12orf60,C15orf33,C18orf54,C1QTNF3,C20orf103,C20orf187,C5,C6orf115,C7orf42,CABP4,CASP10,CATSPERB,CCDC112,CCDC84,CCNI,CDHR3,CHGB,CHIC1,CHRNA3,CHST12,CLCA1,CLEC4F,CLPX,CNTRL,COL4A3,COL9A3,COPS8,COX5A,CPNE2,CSF1R,CUL4B,CXorf22,CYB5A…
hsa-miR-568	ABI3BP,ACTR6,ADAD1,AGFG2,AIM2,AKAP5,ANKDD1A,ANXA1,AOC2,AP3B2,ARL6,ARMCX1,ARPC3,ASZ1,ATAD5,ATG3,ATL1,AUH,B2M,BAG2,BAI3,BMP2,BOC,BTG3,BUB1B,C10orf137,C12orf26,C13orf15,C14orf102,C14orf49,C18orf8,C1QL1,C1orf51,C5orf32,C5orf34,C6orf58,C7orf10,C7orf63,C8orf47,CAPN12,CBWD6,CCDC132,CCDC18,CCL1,CCNA2,CCNL1,CCRL2,CD40,CDC16,CDCA7,CDH11,CDK4,CDKN1C,CEP290,CETN3,CHN2,CLDN14,COL13A1,CRB3,CRH,CSN2,CTSL2,CTU2,…
hsa-miR-569	A4GNT,ABCC9,ACOT4,ACTA1,ADH7,AGBL3,AIF1L,AIMP1,ALDH1A1,ALDH6A1,ALS2CR11,ANAPC1,ANXA10,APAF1,APBB1IP,AQR,ASB11,ATAD5,ATF2,ATOH7,ATP5S,AVPR1A,AWAT1,BAZ1A,BEND5,BMP2K,BMP3,BSPRY,BTAF1,BTNL9,C10orf32,C12orf40,C12orf66,C16orf62,C1D,C1orf141,C1orf227,C2orf73,C3orf39,C5orf45,C6orf146,C6orf57,CAPN10,CCDC121,CCL2,CCR3,CDK2AP1,CDKN3,CEP152,CEP192,CEP290,CEP70,CES5A,CETN3,CKAP5,CNTN6,COQ4,CRABP1,CSNK1A1L,CS…
hsa-miR-570	AASS,ACBD5,ACSF2,ADCK2,ADCK3,ADH5,AHSA1,ALDH1A3,ALG13,ANGPTL5,ARIH2,ASAP1,ASB1,ATG12,ATP5C1,AZI1,B3GNT8,BAG1,BARD1,BCAT1,BIK,BMP2,BRK1,C10orf122,C14orf135,C14orf149,C16orf53,C16orf74,C1D,C1orf174,C1orf182,C2orf69,C6orf165,C6orf170,C6orf221,C6orf57,C7orf46,C8orf47,C9orf46,C9orf78,CACNB4,CCDC23,CCDC28A,CCDC73,CCL11,CCNDBP1,CD109,CD48,CDCA3,CDCP2,CDK2AP1,CEP120,CEP192,CEP72,CHN1,CIZ1,CMAHP,CNKSR3,CN…
hsa-miR-571	ABCF3,ACP5,ACRV1,ACSF3,ADAMTS13,ADRA1A,AEBP1,AGER,AGXT,ALAS2,ALPK1,ANKIB1,ANKRD58,ANKUB1,ANKZF1,ANPEP,AP4M1,APLP1,ARHGAP25,ARHGAP33,ARL4A,ASB10,ATAD2,ATG4D,AUP1,B3GNT4,BAIAP3,BARHL2,BEST2,BRAP,BTBD8,C10orf71,C14orf159,C1orf111,C20orf196,C21orf62,C4orf47,C6,C6orf118,C8orf48,C8orf84,C9orf16,CABP1,CAND2,CAPN3,CASQ1,CCDC37,CCL21,CCL27,CCT3,CD300LB,CD37,CD7,CDC34,CEP152,CLPS,CLU,CPNE9,CPSF4L,CPT2,CRP,…
hsa-miR-572	ABCA2,ABCG5,ACIN1,ADARB2,AGAP2,AIFM1,AKT2,ALDH3B1,AMDHD2,AMH,ARHGAP17,ARHGEF16,ARID5A,ART5,ARVCF,ASIP,ASPDH,ATG9A,ATP13A1,B3GNT4,BAG1,BCR,BIN1,BIRC7,BPIFA1,BST2,BTBD6,BTD,C10orf93,C11orf95,C14orf80,C15orf40,C16orf74,C17orf79,C19orf45,C1orf228,C1orf86,C2orf68,C4BPB,C9orf86,CACNA1H,CAPS,CBS,CBX4,CBY1,CCDC105,CCDC85B,CCM2,CD27,CD72,CD99,CDC34,CDC42BPB,CDH16,CDH22,CDK5RAP1,CDK9,CHADL,CHAF1B,CHKA,CHRD…
hsa-miR-573	AADAC,ABHD14A,ABHD2,ABI3BP,ACAA1,ACAT2,AFG3L2,AFP,AKD1,AKR1C1,ALG5,ALKBH3,ALPK1,AMELX,ANKLE2,ANKRD9,AP2M1,APEH,ARHGEF26,ARSJ,ASB17,ASB4,ASPHD1,ATP4B,BAG3,BANK1,BCHE,BEST1,BIRC2,BLNK,BLVRA,BPY2,BRIX1,C10orf90,C10orf93,C18orf26,C1orf122,C1orf141,C20orf111,C20orf187,C20orf26,C6orf118,C6orf154,C9orf24,CASC1,CCDC167,CCDC18,CCDC62,CCDC73,CCDC96,CCKAR,CCL1,CCR3,CD36,CDK15,CEACAM20,CFLAR,CGA,CHAF1B,CHGB,…
hsa-miR-574-3p	ABCA12,ABCA7,ABLIM2,ACBD4,ACVRL1,ADAMTS17,ADAMTS6,ADAMTSL4,ADM,ADPRHL2,AGTRAP,AIF1L,AIFM1,AKR7A2,ALOX5AP,AMOTL1,ANGPTL6,ANKRD22,ANKS1B,ANO2,AP2A1,AP2S1,APBB1IP,AQR,ARHGAP9,ARHGDIA,ARHGEF25,ARHGEF4,ARL13A,ARVCF,ATF7IP,ATG2A,ATP1A1,ATP2A2,ATP6V1A,ATP6V1G3,ATRIP,ATXN1,AURKA,B3GALT6,BACE2,BCAP31,BMP3,BPIFB1,BPIFC,BRF1,BTK,BTN2A2,C10orf47,C11orf96,C14orf183,C15orf27,C16orf53,C17orf99,C19orf18,C19orf52…
hsa-miR-574-5p	AATK,ABHD5,ABI2,ABR,ACBD4,ACD,ACOX3,ACTL7B,ACTL9,ADAMTS10,ADAMTS6,ADCK5,ADCY9,ADRA1A,AGTRAP,AGXT,AHRR,AKAP10,AKT2,AKT3,ANK1,ANKRD24,ANKRD46,APOH,APRT,AQP1,ARG1,ARHGAP10,ARHGEF1,ARHGEF17,ARID3A,ASB11,ASNA1,ATP2B3,ATPAF2,AUH,B2M,B3GALT1,BAI1,BAI2,BCAP31,BCAR3,BCL2A1,BCL7B,BIN2,C11orf96,C14orf102,C16orf57,C19orf40,C19orf80,C1orf111,C1orf227,C1orf86,C20orf123,C21orf63,C22orf25,C3,C3orf32,C6orf118,CAC…
hsa-miR-575	AACS,ACBD6,ADAMTSL1,AKT1S1,ALPK2,ANKRD27,ANKRD54,ARHGEF16,ARSF,ARX,ASCC1,ATL2,ATP13A1,ATP1A3,ATP2C2,ATPAF2,AWAT1,BAG1,BCAP31,BCL9,BPIFA2,C10orf62,C13orf33,C15orf55,C16orf59,C16orf74,C1QA,C1orf201,C1orf85,C20orf27,C6orf154,C7orf29,C8orf76,CACNA1D,CAMK2N2,CAPS,CARD14,CCDC134,CCDC23,CCDC66,CCDC88C,CD248,CDC25C,CDC27,CDC45,CDCA5,CDH23,CEACAM4,CHD3,COPS2,CPNE2,CPT1C,CRABP1,CRTC1,CRYAA,CSRP2,CSTA,CTNNB…
hsa-miR-576-3p	AADAC,ACPP,ACRC,ACTL7B,ADA,ADAMTSL1,ADAP2,AGBL3,AGBL4,AKAP3,AKR1E2,ALDH18A1,ALG13,ALX1,ANGPTL5,ANKRD36,ANUBL1,ANXA5,APCS,ARHGAP15,ARHGDIB,ARID5B,ARL14,ARPC2,ASTE1,ASZ1,ATL1,ATP2A1,ATP8A2,BAI3,BAMBI,BCHE,BPIFA3,BTD,BTG4,C10orf120,C10orf122,C11orf61,C11orf73,C11orf84,C15orf48,C16orf91,C1QTNF9,C1QTNF9B,C1orf112,C1orf194,C2orf66,C2orf67,C6orf103,C6orf115,C6orf146,C6orf211,C6orf70,C7orf11,C8B,C9orf129…
hsa-miR-576-5p	AADAC,ACOX3,ACPP,ACRC,ACSM2A,ADAMTSL1,ADCK2,ADRB3,AGBL1,AGBL4,AHNAK,ALG8,ALOXE3,ALS2,ANGPTL5,ANKAR,ANKRD30B,ANKRD44,AP2A2,APIP,ARG1,ART3,ASB4,ATP11C,ATP5F1,ATP6AP2,ATP6V1G3,BCL7A,BMPR1A,BORA,BTD,C11orf54,C11orf63,C11orf74,C11orf84,C15orf43,C15orf60,C18orf55,C1QTNF9,C1QTNF9B,C1orf141,C1orf146,C20orf111,C20orf118,C2orf28,C2orf66,C2orf80,C6,C7orf11,C9orf3,CASP12,CBLN4,CCDC34,CD1B,CDR1,CENPK,CENPW,CE…
hsa-miR-577	ABCC10,ACSL6,ACTL8,ADHFE1,ANAPC10,ANKRD10,APBB2,ASB3,ATG16L2,ATG4D,BAMBI,BRI3,C11orf82,C16orf80,C1orf146,C1orf49,C20orf85,C2orf29,C6orf165,C7orf11,C7orf46,C8B,C8orf34,C8orf59,CCDC81,CCDC82,CCDC84,CCL2,CCNT2,CCS,CDKN2C,CDX4,CELF5,CENPW,CEP192,CHCHD1,CHGA,CLASRP,CLCA4,COPS3,CREB3L4,CRNN,DCHS2,DCPS,DDA1,DEFB118,DEM1,DENND4B,DHX9,EEF1E1,EFCAB5,EFEMP1,EFHB,EGFL6,EIF2AK4,ESCO1,FAM105A,FAM162B,FAM184A,F…
hsa-miR-578	ACAT2,ACSBG2,ACTRT1,ADAMTS17,ADPGK,AGBL3,AIG1,ALDH9A1,AMELX,AMOT,ANKHD1,ANKRD19P,APOBEC3B,ARHGDIB,ATF1,ATP6V1G3,BATF,BCAN,BCL2L10,BOC,BOD1,BRD8,BST1,BYSL,C10orf107,C17orf58,C1orf131,C1orf141,C9orf102,CCDC150,CCL21,CCRL2,CD70,CDK5RAP3,CEACAM21,CEP120,CEP78,CHCHD3,CHRNA6,CLDN12,CLDN14,CLEC4F,CMAHP,CMPK1,CNTNAP4,COX10,CPVL,CREM,CRHR1,CRYAB,CTSC,CTSH,CXorf21,CYP2R1,DAO,DCTN2,DDR1,DDX26B,DENND1C,DNTTI…
hsa-miR-579	ABCD4,ABI2,ACIN1,ADAM18,ADHFE1,ADI1,ADRA1A,AGBL3,AGXT,AGXT2L1,AKR1E2,AMDHD1,ANGPTL5,ANKRD37,APAF1,APBB1IP,APIP,APOOL,ARL14,ARL4A,ARMC2,ASAH2,ASAH2B,ATL3,ATP6V0A4,B3GNT5,BARD1,BBOX1,BEST1,BFSP1,BRI3,BSPRY,BST1,C14orf49,C19orf12,C19orf69,C1GALT1,C3orf33,C5orf32,C5orf34,C6orf103,C7orf45,C7orf46,C8orf76,CACNB4,CACNG7,CADM2,CASQ1,CCAR1,CCBL2,CCDC102A,CCDC162P,CCDC59,CCL18,CCNL1,CD1B,CDKAL1,CFDP1,CHRNA…
hsa-miR-580	AADAC,ACAT1,ACTR6,ADAM21,AGAP5,AGAP6,AGAP8,AHNAK2,AKNA,ANKRD55,ANKS4B,APOO,ARHGEF35,ARIH1,ARMC2,ASAP1,ASB11,ASCC1,ASPM,ATP6V0A4,ATP6V1H,BACE2,BARD1,BBS9,BET3L,BMS1,BRDT,BRMS1L,C11orf63,C12orf11,C12orf48,C13orf27,C15orf43,C17orf64,C19orf28,C1S,C20orf85,C3AR1,C3orf67,C4orf41,C7orf23,C8orf34,C8orf84,C9orf64,CAMK2D,CARS,CASP12,CCDC62,CCDC89,CCDC92,CCL23,CCT8,CD1B,CD226,CD244,CDH26,CEP290,CETN1,CFH,CH…
hsa-miR-581	AARS2,AASS,ABHD16B,ACAT2,ACSM3,ACTR5,ADAMTS6,ADK,AGBL2,AGBL3,AGBL5,AHSG,ALPK2,ALPPL2,AMELX,ANAPC5,ANGPT4,ANXA13,APOA1BP,ARHGAP6,ARHGDIB,ARHGEF16,ARMC3,ASB3,ASB7,ASL,ASMT,ATL3,ATP5B,AURKA,AVPR1A,BATF,BBS7,BEST3,BIN3,BLOC1S1,BOC,BOD1,C10orf57,C11orf84,C14orf102,C14orf93,C15orf24,C16orf71,C17orf58,C17orf79,C1S,C20orf72,C20orf85,C2orf61,C4orf37,C5orf48,C6orf118,C9orf85,CALY,CAPN13,CAPN2,CAST,CATSPER3…
hsa-miR-582-3p	AATF,ABCB11,ABCC3,ABHD5,ABT1,ACAA2,ACAT1,ACTB,ADAM30,ADCK3,AHR,AIG1,AIMP2,AKAP1,AKIRIN2,ALDH9A1,ALS2CR8,AMY2B,ANKRD42,ANP32B,AQR,ARHGAP21,ARPP21,ARR3,ARSJ,ASB9,ATF2,ATG4D,ATG7,ATP2A2,ATP5C1,ATP5J,ATP5S,ATP6V1E1,ATRNL1,AVEN,BBS2,BBX,BEX2,BNIP1,BNIPL,BRIX1,BST2,C10orf57,C10orf81,C11orf46,C11orf63,C11orf88,C12orf62,C15orf33,C16orf59,C16orf61,C18orf19,C18orf63,C19orf2,C1orf129,C1orf49,C1orf94,C3orf54…
hsa-miR-582-5p	ABCC3,ABCC8,ACAT1,ACCS,ACO2,ACOT13,ACOXL,ACP5,ACTA2,ACTR5,ACTR6,ACYP2,ADAM29,AFF4,AGTPBP1,AKAP1,AKIRIN2,ALOX5AP,AMY2B,ANKRD5,ANKUB1,APH1B,APLNR,ARHGAP12,ARHGAP30,ARID4B,ARL6IP1,ARPC1A,ART3,ASB3,ASNA1,ASPHD1,ATP2C2,AUTS2,B3GALT2,BCL2L10,BLZF1,BMP10,BPI,BUB1B,BUB3,C10orf81,C11orf61,C12orf63,C14orf149,C15orf33,C15orf44,C16orf52,C17orf58,C17orf72,C1QTNF8,C1orf129,C1orf49,C20orf106,C3orf65,C5orf25,C5o…
hsa-miR-583	AAMP,ADAD1,ADRB2,AHRR,AHSA1,AKIP1,ALX1,AMIGO2,ANKRD2,ANXA10,AP1S1,APCS,APEX2,APOBEC4,AQP5,AREGB,ARIH2,ATF7IP,ATP13A4,ATP1A1,ATP6V1E2,AURKC,BFSP2,BSDC1,BTD,C10orf57,C14orf1,C15orf41,C17orf50,C19orf39,C1QL2,C1S,C1orf50,C2orf54,C2orf76,C2orf89,C3orf39,C6orf108,C6orf62,C7orf26,CACNG7,CALHM3,CASK,CCDC117,CCDC39,CCNDBP1,CDK5RAP1,CDY1,CDY2A,CEP152,CLCN5,CLEC2A,CLPTM1L,CLTA,COG5,COQ4,CPA4,CRB1,CREB3L4,CT…
hsa-miR-584	AASS,ABCB7,ABHD12,ACAA2,ACAD8,ACO2,AGER,AIM2,AMN,ANKRD6,ANXA1,ANXA10,APOB,AREGB,ARHGAP32,ARHGDIA,ARHGEF40,ARIH1,ARMCX2,ARMCX5,ATCAY,ATG4C,ATP4B,ATP5L,AVPI1,BAG3,BCAS2,BCL6,BIRC2,BOC,BPIFB2,BPIFB3,BRP44,C12orf5,C12orf52,C14orf166,C17orf50,C17orf75,C18orf26,C19orf18,C1orf146,C1orf182,C1orf96,C20orf94,C4orf37,C6orf10,C8orf47,C9orf86,CA6,CACNA1D,CCDC105,CCDC62,CCDC90B,CD101,CD38,CDC123,CDC16,CDH22,CD…
hsa-miR-585	ABCB9,ABHD16B,ACOX3,ACP5,ACPT,ACRBP,ADAMTSL4,ADRA1B,AHRR,ALG14,ALOX5AP,ANKRD6,ANO9,ANXA1,ARHGAP15,ARIH1,ASPHD1,ATE1,ATL1,B3GALT6,B3GNTL1,BACE2,BATF,BPY2,BRD4,C10orf62,C11orf46,C11orf96,C12orf26,C12orf57,C1QC,C3,C3orf38,C6orf136,C9orf84,C9orf86,CACNG8,CAMK2B,CAPN10,CAPN9,CARD16,CBX2,CCDC12,CCDC9,CDKN2A,CDR2,CDT1,CLIP3,CNGA1,CNIH4,CNOT1,CNTN6,COL23A1,COL5A1,COMT,COPA,COX6A2,CRTAC1,CSAG1,CXorf38,CXo…
hsa-miR-586	ACAA2,ACOT12,ACTR6,ADAMTS6,AGPHD1,AGTR2,ALOX5AP,ALX1,AMELX,AMY1B,ANGEL2,ANTXR2,ANUBL1,ARMC4,ARMCX1,ASB3,ATP13A5,BAI3,BMPR1B,BOC,BRD8,BRDT,BTBD2,C10orf107,C12orf48,C12orf50,C15orf33,C16orf78,C1orf101,C2orf29,C4orf29,C6orf115,C6orf57,C8orf84,C9orf135,C9orf46,CCDC147,CCDC36,CCL2,CCRL2,CD1B,CDH11,CDH19,CDK17,CENPE,CENPW,CEP57L1,CHMP4B,CHST13,CHST9,CKS2,CLCA1,CLDN20,CLPTM1L,CLUL1,CMTM8,CNOT1,CNOT4,CNT…
hsa-miR-587	ABCG5,ABHD16A,ACLY,ACTA1,ADAMTS6,ADCK2,AMTN,AP4B1,APIP,AQP11,ARG1,ARMC2,ARPC1A,ATP1A1,ATP5F1,ATP6AP2,ATP6V0E1,BCDIN3D,BCL2A1,BMP2,BTNL2,C10orf62,C10orf68,C12orf62,C16orf62,C19orf18,C1orf114,C1orf177,C1orf186,C1orf31,C5orf32,C7orf36,C8orf38,CANT1,CAPZB,CCBL2,CCDC147,CCDC152,CCK,CCL8,CDC27,CDH16,CDH18,CENPW,CES4A,CHAC2,CHD8,CLPTM1L,CNIH,CNOT10,CNTNAP4,CNTRL,COG2,COL11A2,COLEC11,COPA,COX7A2L,CR1,CR1…
hsa-miR-588	AATK,ABCA7,ABHD16A,ACCS,ACER1,ACTR5,ADAMTS17,ADAMTSL1,ADARB2,ADAT3,ADCK1,AEN,AFG3L2,ALDH4A1,ALG12,ANGPTL2,AP2A1,AP2M1,APOC1,ARHGAP31,AS3MT,ATF7IP2,ATG7,ATP6V0A4,AXDND1,B3GNTL1,B4GALT7,BAIAP3,BCMO1,BID,BNIP3,C11orf24,C14orf149,C14orf80,C15orf23,C17orf72,C1GALT1,C1orf170,C1orf35,C3orf62,C4orf29,C9orf71,CAMSAP1,CAPN13,CCDC136,CCDC61,CCDC71,CCDC80,CCDC92,CCDC94,CCM2,CCNA2,CCND3,CD97,CDC34,CDH8,CEP128…
hsa-miR-589	ABCC11,ABCC3,ACAD10,ACO2,ACR,ADAD1,ADAMTS14,ADAR,ADCK3,AHDC1,AKAP1,AKT2,ALDH4A1,ANKRD29,ANKZF1,APBB1,APOH,ARSI,ATP2B2,ATP5SL,ATP6V0B,ATPIF1,AUP1,B3GAT3,BABAM1,BAG1,BARHL1,BAZ2B,BEST3,BEST4,BICC1,BLVRA,BMPR1A,BZRAP1,C10orf136,C12orf11,C12orf62,C14orf135,C16orf42,C17orf53,C17orf59,C19orf10,C1QL3,C1orf172,C1orf201,C1orf222,C1orf43,C3AR1,C5orf35,C6orf145,C8orf42,C9orf79,C9orf86,CACNA1C,CACNA1G,CALCB,…
hsa-miR-589_star	AASS,ANAPC11,APOL4,ASB2,ATP5J,BEND5,C11orf73,C17orf79,CAST,CBX5,CD81,CFH,CIR1,COL1A2,CXorf38,CYP2J2,DDX24,DTNA,EFTUD1,EPHX2,FBXL4,GBE1,GEMIN8,HIF3A,HIPK1,HPRT1,ITGB4,KCNIP1,KCNRG,LSM4,MED25,MMP9,MYOG,NDUFS5,NHP2L1,NR1D1,PBXIP1,PDIA5,POLE4,PPP3CC,PRRT1,RAB13,RBM39,REPS2,RPN1,SAFB,SERPINE2,SH2D3C,SIAH2,SLC2A13,SLC4A1AP,SMG8,SNRNP70,SNRPB2,STMN1,TAF13,TDRD9,TGIF2LY,TMEM126B,TMEM141,TMEM186,TMEM60,TM…
hsa-miR-590-3p	AADAC,ABCA6,ABCC10,ABHD12B,ABHD3,ACO1,ADCK2,ADRB2,AGMO,AKAP3,AKR1C1,ALG5,ALG6,ALKBH7,AMACR,AMBN,AMPD1,AMY1B,ANAPC1,ANKHD1,ANP32B,ANXA3,ANXA5,ARG1,ARL1,ARMC9,ARMCX5,ARPC1A,ASB4,ASCC3,ASIP,ASPA,BAMBI,BBS2,BCCIP,BCDIN3D,BLVRA,BPNT1,BRAF,BRIP1,BSPH1,BTBD6,BTK,C10orf58,C12orf11,C12orf50,C12orf51,C13orf15,C13orf27,C14orf109,C14orf149,C15orf48,C18orf55,C1orf9,C20orf7,C20orf78,C2orf76,C5,C5orf34,C5orf47,…
hsa-miR-590-5p	AADAC,ABHD12B,ACAT1,ACOT13,ACYP1,AFTPH,AGBL4,ALX1,AMACR,AMICA1,AMPD1,ANAPC1,ANAPC11,ANGPTL5,ANKMY2,ANKRD37,ANKRD55,ANXA1,APEH,APPL2,ARG1,ARHGAP31,ARID4A,ARMC4,ARMCX1,ARMCX5,ARPC3,ASB11,ASIP,ASNSD1,ASPA,ATL3,ATP13A4,ATP5B,BDH2,BEST3,BPI,BRD1,BTK,C10orf122,C10orf137,C11orf53,C13orf15,C13orf33,C17orf48,C17orf79,C1orf101,C20orf7,C2orf56,C2orf76,C3orf37,C4orf19,C6orf138,C7orf25,C9orf156,CA1,CACNA1A,CA…
hsa-miR-591	A4GNT,ABCD1,ACAA1,ADSL,AK1,AKNA,AKR1C4,ALKBH1,ALOX15B,AP2S1,APOBEC3C,APOBEC3D,ART5,ATP1A4,ATPIF1,B3GALNT2,B3GAT3,BBS12,BLMH,BPIFB4,BPTF,BPY2,BRD2,C10orf128,C11orf31,C11orf91,C12orf60,C12orf62,C14orf102,C14orf159,C16orf57,C16orf74,C19orf44,C19orf51,C19orf6,C1orf159,C2,C20orf123,C20orf160,C20orf203,C6orf145,C6orf201,C9orf68,C9orf85,CARD14,CARHSP1,CASP12,CCDC136,CCK,CCL7,CCNL1,CD300LG,CEP152,CEP89,C…
hsa-miR-592	AASDHPPT,ABHD10,ACAA2,ACSF2,ACTA1,ACVR2B,ADNP,AGPHD1,AGR3,AKD1,AMTN,ANGPTL1,ANK3,ANKRD49,APOOL,ARFRP1,ARHGAP12,ARMC4,ARRDC2,ASB7,ATP1A4,ATP2A1,ATP6V0A4,ATP6V1G3,ATPIF1,BPIFA1,BPY2B,BST1,BTBD6,C10orf122,C11orf88,C12orf11,C14orf102,C19orf29,C19orf52,C1GALT1,C1orf94,C20orf26,C4orf37,C6orf192,C7orf23,C9orf30,C9orf41,CA1,CABS1,CARD16,CARTPT,CBWD3,CBWD5,CBWD6,CCDC54,CCKBR,CCNDBP1,CD9,CD97,CDH19,CDY1,CE…
hsa-miR-593	AAMP,AASS,ACE,ADIPOR1,ADM,AHSG,AIM1L,AMICA1,ANGPT4,ANKZF1,ANO2,APBA2,APOOL,ARHGAP25,ARL14,ARTN,ATP6AP1L,AZI1,B4GALT7,BATF,BCL9,BIN2,C12orf52,C16orf42,C17orf78,C19orf80,C1orf186,C20orf132,C2orf57,C3orf22,C4orf36,C9orf142,C9orf71,CAPN12,CBY1,CCDC107,CCDC12,CCDC22,CCDC24,CCDC27,CCDC37,CCL25,CCM2,CD22,CD27,CD320,CD79B,CD8B,CDC26,CDCA7L,CDHR4,CEP120,CHCHD1,CIITA,CLN3,CNPY3,CR1,CREB3L3,CTDP1,CUEDC1,CUT…
hsa-miR-593_star	ACO1,ACOT7,ALKBH6,ASAP3,ASPG,BEND5,BIRC7,C20orf196,C20orf26,C9orf141,C9orf25,CDH23,CDK5,CEMP1,CYP27A1,DENND1C,DHX35,DOCK6,ECHS1,ECM1,EDARADD,EPS8L2,ESPNL,FAF1,FAM169B,FEZ1,FKBP4,GAL3ST1,GJA4,GRASP,GRM8,GTF3C5,HGSNAT,HRH3,IL32,LRGUK,MAP4,MIF4GD,MLST8,MT3,NCDN,NCKAP5L,NT5C,NXF1,PABPC5,PEMT,PES1,PHLDB3,PLA2G5,PORCN,PPP1R14B,PRAMEF11,RBFA,RHBDF2,RHOG,RPS13,S100A16,SLC6A13,SLC7A4,SNAP91,SUGP2,TMEM141,…
hsa-miR-595	AARS,ABCC10,ABHD5,ACO1,ACRBP,ADAM21,ADIPOR1,AGBL2,AGTR1,AHI1,AKIRIN1,ALKBH5,ALS2CL,AP4B1,APEH,APOH,ARHGAP10,ARHGAP6,ARHGEF40,ATP12A,ATP6V0E1,BCAR3,BPIFA2,BRIX1,C14orf102,C14orf166,C14orf2,C15orf44,C16orf87,C18orf34,C18orf55,C19orf56,C1orf112,C1orf194,C1orf222,C20orf85,C5orf44,C8orf38,C8orf84,C9orf68,CAD,CARD14,CC2D1A,CCDC33,CCDC40,CCDC56,CD86,CDYL2,CENPN,CEP76,CGA,CGRRF1,CHAF1B,CHPF,CHRNA1,CLDN15…
hsa-miR-596	AATK,ABCF2,ABTB1,ACP5,ACPP,AKAP17A,ALOX5,ANKRD13D,ANKS1B,ANO1,AP3B2,ARFGAP2,ARHGAP39,ARPC1B,ASCC2,ATAD3B,ATP13A4,ATP2A3,ATP2C2,ATP5B,ATP5D,ATP6V0B,B4GALT2,B4GALT7,BAI2,BCKDK,BCL7B,C10orf57,C10orf93,C11orf95,C16orf87,C19orf28,C1QBP,C1orf86,C1orf95,C20orf203,C20orf26,C21orf2,C21orf33,C21orf58,C22orf15,C3orf22,C6orf201,CACNA1I,CACNG1,CALCA,CALML3,CCDC106,CCDC58,CCDC78,CCR10,CD164L2,CDC42EP2,CDH24,CH…
hsa-miR-597	ABCA1,ABHD12,ACAD9,ACO1,ACP5,ACP6,ADAM29,AKD1,ALPK1,AMELX,AMY2B,ANK2,AP2S1,AQP11,ARF5,ARHGEF4,ARL1,ARL14,ARMC4,ARPC1A,ARPP21,ASB10,ASCC3,ASRGL1,ATP1A4,ATP2A1,ATP6V1G3,ATRIP,BCL6B,BFAR,BRI3,BRIP1,C11orf49,C15orf24,C16orf91,C19orf59,C1GALT1C1,C1QA,C20orf26,C20orf29,C4orf17,C6orf27,CALHM1,CAPN13,CBLL1,CCBL1,CCDC71,CCNG2,CD52,CDY1,CEMP1,CHD7,CHKA,CKAP5,CNOT4,CNPY4,CNTNAP4,COL9A3,CSN1S1,CSNK1D,CT47B1,…
hsa-miR-598	ACAA2,ACOX2,ACTL6B,ADAM23,ADAMTS2,ADCK2,AFMID,AKAP3,AKR1C3,AKT3,ALDH1A3,ALPK2,ALS2CL,ANXA1,APOBEC2,APOOL,ARID3C,ARL14,ARMC5,ARPC1A,ART3,ASGR1,ATG9B,BCAN,BCL2A1,BMS1,BNIP3,BRAT1,BRWD1,C12orf48,C12orf54,C13orf27,C16orf59,C16orf92,C17orf107,C17orf49,C19orf52,C1orf123,C2CD2L,C3orf25,C3orf77,C4orf29,C5orf44,C5orf50,C6orf221,C8orf47,C8orf85,CAPRIN2,CASP3,CCDC33,CCDC77,CCR8,CD1A,CD244,CD27,CDA,CDKL3,CDY…
hsa-miR-599	AASS,ABHD14A,ACOT12,ACSF2,ACTA1,ACVR2B,ADAM2,ADK,AKAP5,ALDOB,AMELX,ANGPTL1,AP4B1,AP4M1,APOOL,ARHGEF9,ASB7,ASPHD1,ATF1,ATP1A4,BAG2,BPIFA1,BRSK1,BST1,BST2,BTBD16,BTG1,C10orf67,C12orf63,C14orf102,C1QTNF9B,C1orf150,C1orf94,C20orf26,C2orf47,C3orf25,C4orf37,C6orf48,C9orf141,C9orf41,CAPN12,CARD16,CARTPT,CASP10,CC2D1A,CCBL1,CCDC152,CCDC54,CCDC62,CCKBR,CCL16,CCL23,CDH19,CDK9,CDNF,CEACAM21,CEACAM3,CEBPB,CH…
hsa-miR-600	ABCC9,AFM,AIG1,ANK1,ANKRD55,ANKRD6,ANO9,APOBEC3H,ARL4D,ASPA,BEX4,BEX5,BHLHE40,BRCA2,C10orf76,C11orf53,C12orf60,C15orf40,C17orf101,C17orf63,C1orf93,C6orf165,C9orf156,CAB39L,CAST,CATSPER4,CCDC111,CCK,CCNE1,CD27,CD7,CDC25A,CDH15,CERS4,CHST1,CLVS2,CNTRL,COG7,COQ5,COX6A2,CPN1,CPT2,CSN1S1,CSNK1A1L,CTBP2,CTDP1,CTPS2,CTSE,CXorf41,CYP26A1,DBX2,DCTPP1,DDOST,DEC1,DIABLO,DNM3,DUSP2,DUSP22,DZANK1,EFHB,ENAH,EP…
hsa-miR-601	ABCF3,ABHD14A,ACCN3,ADAT3,ADHFE1,ALDH3A1,AMICA1,ANGPT4,ANGPTL6,ANKHD1,APBB1,APOO,ARHGEF25,ARIH1,ARIH2,ATP6AP1,B3GNTL1,BCAM,BCKDK,BEST2,BPIFA4P,BPIFB2,BYSL,C10orf53,C11orf20,C12orf44,C14orf133,C17orf58,C19orf44,C19orf51,C19orf68,C1QBP,C1QC,C1QTNF4,C1orf131,C1orf162,C1orf172,C3orf22,C3orf25,C6orf25,CABLES1,CADM4,CAPS,CARD10,CARS2,CCDC23,CCDC40,CCDC58,CCDC66,CCL26,CD164L2,CD36,CD3E,CD5L,CD72,CDA,CDH…
hsa-miR-602	AACS,AAMP,AATK,ABHD4,ABHD8,ABL2,ACAD9,ACAP3,ACOT6,ADAP1,ADCK1,AIP,AKR1B1,ANAPC11,ANAPC2,ANKRD24,ANO10,ANO9,ARHGAP10,ARHGAP35,ARL6IP4,ARL8A,ATG4B,ATP5D,ATP5G2,ATP6V0B,B3GALT6,B3GNTL1,BABAM1,BACE2,BEST4,BRSK1,BSND,C16orf42,C16orf45,C17orf101,C19orf35,C1QA,C1orf86,C20orf20,C2orf85,C4orf48,C5orf38,C6orf130,C7orf26,C8G,CABIN1,CALCA,CALY,CAMK2B,CAPN1,CARD10,CCDC12,CCDC135,CCDC37,CCDC92,CD101,CD27,CDC16…
hsa-miR-603	AACS,ABTB1,ACSS1,ACVRL1,ADAM32,AGBL2,AGPAT9,AHRR,ALKBH5,ALX1,AMACR,AMOT,ANKAR,ANKRD49,ARHGAP10,ARHGEF9,ARMC3,ARPC4,ART5,ASZ1,ATL2,AVEN,B4GALT7,BCAR1,BCOR,BEST4,BPGM,BPI,BRD9,BTBD7,BTD,C11orf41,C11orf53,C14orf2,C15orf24,C16orf53,C17orf99,C18orf19,C1orf100,C1orf101,C1orf216,C20orf26,C21orf33,C4orf46,C5orf24,C6orf130,C6orf154,C8orf47,C9orf153,CACNA1B,CACNB3,CAPZB,CCDC122,CCDC132,CCL25,CCL3L3,CCM2,CC…
hsa-miR-604	ABCA2,ABHD11,ABHD12B,ABI3,ACBD6,ACIN1,ADAM15,ADCK3,AKR1E2,AKR7A2,ALG14,ANKRD13D,ANKRD2,ANKRD24,ANKS3,ANKS6,AP1M1,AP3B2,APCDD1,APOE,ARHGAP21,ARHGAP39,ASCC2,ATF3,ATN1,ATP1A4,ATP2C2,ATP6V0B,ATP7B,AVIL,BAG3,BARX1,BCAR1,BEGAIN,BRI3,BSND,C11orf2,C16orf71,C17orf90,C19orf26,C19orf43,C1orf65,C20orf151,C20orf160,C20orf26,C21orf2,C22orf28,C2orf68,C2orf82,C4orf36,C7orf26,C7orf41,C8orf58,C9orf96,CALML6,CALY,C…
hsa-miR-605	AADAC,ABHD2,ABI2,ACAD9,ACOX3,ACTR3,ADAL,ADAM33,ADRA1B,ADRB2,AGAP3,AGBL1,AGPAT4,AKR1E2,ALDH4A1,ALKBH3,ANKRD13A,AP4B1,APOA1BP,ARHGAP9,ARL9,ARSA,ASPHD2,ATG16L2,AURKA,B4GALNT3,B4GALT3,BATF2,BCDIN3D,BNIPL,BTBD16,C11orf84,C12orf41,C16orf57,C16orf87,C17orf47,C19orf33,C1orf204,C1orf49,C20orf46,C20orf62,C22orf31,C5orf38,C5orf63,C6orf126,C6orf132,C6orf163,C6orf211,C9orf23,C9orf4,C9orf9,CACNG3,CANT1,CCDC101…
hsa-miR-606	AADACL2,AARS2,ABCA12,ACBD5,ACVR1,ACYP1,ADAT1,AHR,AIG1,AIPL1,ALDH1A1,ALG10B,ALG13,ALG14,AMDHD1,ANLN,AP3S1,ARFGAP3,ARL1,ARPC1A,ASAH1,ASB3,ASNSD1,BBS2,BET3L,BPTF,BTBD6,C12orf60,C14orf135,C16orf61,C1GALT1C1,C1orf110,C2orf43,C3orf22,C9orf85,CBX3,CCAR1,CCNA1,CCNA2,CCNC,CCNL1,CCT8,CELA1,CENPQ,CEP57L1,CEP76,CFD,CIZ1,CLDN20,CLUL1,CLVS2,CNST,COG3,COL14A1,COL9A1,COLEC11,COMMD3,CPB2,CPSF6,CRB1,CSGALNACT2,CSN…
hsa-miR-607	ACSBG2,ADH6,ADRB2,AK7,ALDH2,ALDOB,AMPD3,ANGPTL6,ANKHD1,ANXA13,ARHGAP17,ARHGAP32,ARPC3,ATP2C1,ATP6V1G3,AUTS2,AZGP1,B2M,B4GALT4,BICD1,BMP2K,BRCA2,BRD3,BRP44,C11orf67,C12orf11,C14orf135,C14orf28,C15orf26,C15orf48,C17orf108,C17orf75,C1QL3,C1orf112,C20orf134,C2orf29,C5orf15,C6orf115,C6orf146,C8orf34,C8orf48,C9orf156,CAMK2N1,CCNB1,CCNL1,CCT2,CD163,CD244,CDC45,CDCA5,CDKL3,CDKN2AIP,CDO1,CETN1,CHCHD1,CHEK…
hsa-miR-608	ABHD12,ABLIM2,ACBD4,ACCN3,ACCN4,ADARB2,ADAT3,AFG3L1P,AIFM2,ALDH3A1,ALOX5AP,AMIGO3,ANAPC2,ANO9,ANXA9,AP2S1,APEX1,APOA2,APOE,AQP3,ARHGEF1,ASPSCR1,ATN1,ATP1A3,ATP6V0B,ATP6V1B1,B3GAT3,B3GNT7,BAIAP2L2,BARHL1,BIK,BPIFA2,C11orf84,C15orf27,C15orf39,C16orf7,C16orf89,C17orf101,C17orf81,C19orf53,C19orf71,C1QB,C20orf134,C2orf42,C6orf103,C6orf15,C7orf43,CABIN1,CACNG1,CALB2,CALR,CAMK1,CAPS,CARD11,CBS,CCDC24,CC…
hsa-miR-609	ABCC10,ABCC2,ABHD16A,ACOX3,ADARB2,ADRA1A,ADSS,AGAP2,AGER,ALG14,ALKBH5,ANKRD30BL,ANKRD33,ANKRD9,APOA2,ARIH2,ASRGL1,ATP1A1,ATP2C2,AUTS2,BAI1,BBS9,BEGAIN,BEND5,BEST1,BFSP2,BMPR1B,BPIFA1,BRD4,BRSK2,BYSL,C11orf72,C11orf84,C16orf7,C17orf81,C18orf21,C19orf56,C2CD3,C2orf53,C2orf65,C2orf85,C9orf169,C9orf68,CALHM2,CARD11,CARHSP1,CASP10,CCDC105,CCKAR,CDA,CDH16,CDH23,CDKN2D,CGN,CGREF1,CHI3L1,CIB4,CLCN2,CLN6,…
hsa-miR-610	AANAT,ACAA1,ACER3,ACO2,ACOT12,ACOT13,ACRV1,ACSM5,ADAMTSL1,AEN,AGK,ALDH1A1,ANKHD1,ANKS1B,ANXA5,APOH,APOOL,ASB11,ATAD5,ATG9A,ATP5A1,ATP5G2,B3GNT1,B3GNT4,BCO2,BEST1,BEST4,BLVRA,BOLA3,BORA,BRAP,BTD,BTNL9,C10orf112,C11orf1,C12orf5,C12orf63,C13orf26,C17orf42,C1orf134,C20orf118,C4orf41,C5orf22,C6orf141,C6orf170,C7orf11,C9orf4,CA6,CBLN1,CCDC115,CCDC127,CCDC30,CCDC38,CCDC96,CCL25,CCL26,CCT2,CCT8L2,CDSN,CE…
hsa-miR-611	A3GALT2P,ABLIM3,ACAD9,ACHE,ACSF2,ADAM15,ADAMTS8,ADCK4,ADRBK2,AGXT,ANGPT4,ANO7,APBA3,APOE,AQP8,ASB1,ASB2,ATP4A,ATP5B,ATP6V0D1,B4GALT4,BABAM1,BHLHE23,BIN1,C11orf85,C14orf166B,C14orf80,C16orf58,C17orf59,C19orf57,C19orf71,C1S,C1orf159,C1orf85,C20orf134,C2orf53,C5orf46,C9orf156,C9orf89,CACNG7,CALY,CAMK2D,CBLC,CCDC106,CCDC116,CCDC88B,CCL2,CCS,CD164L2,CDK10,CDK4,CECR2,CHRDL2,CHST11,CHTF18,CIB1,CIRBP,CMT…
hsa-miR-612	ABCA2,ABCA3,ACAD10,ACE,ACOX3,ACSF2,ADAMTS16,ADCK4,ADRA1A,AFAP1,AGRN,ALDH1L1,ALKBH4,AMDHD2,AMN1,APBB1IP,APLNR,APOA4,ARHGAP4,ASL,BAIAP2L2,BARHL1,BATF3,BPIFB4,BRMS1,BRSK1,BST1,C11orf91,C12orf63,C19orf28,C19orf6,C1orf111,C1orf35,C1orf85,C20orf85,C2orf65,C7orf72,CABIN1,CABP2,CACNA1H,CAPN9,CAPS,CBY3,CCDC102A,CCDC106,CCDC12,CCDC19,CCM2,CCS,CD151,CD248,CD7,CD72,CD84,CDH1,CDH4,CDIPT,CELA3A,CENPH,CERCAM,CH…
hsa-miR-613	ABCB7,ABCC10,ABHD3,ACAA2,ACSBG2,ACSF2,ADAM21,ADAMTS12,ADAMTS2,ADAMTS20,ADAT1,AGMO,AGPAT1,AKAP12,ALX1,ANK1,ANKIB1,ANXA5,APOA1,APRT,ASH2L,ASPA,AXDND1,BARHL2,C11orf35,C11orf61,C12orf52,C12orf56,C13orf26,C14orf159,C15orf48,C17orf64,C18orf10,C1GALT1,C1orf85,C20orf26,C22orf28,C4orf7,C7orf23,CA8,CAPS2,CCDC101,CCDC107,CCDC36,CCL2,CD300LF,CDC25C,CDK9,CENPC1,CHAMP1,CHSY1,CIDEC,CITED2,CLCA4,CLEC9A,CLPP,CNN3…
hsa-miR-614	AAMP,ACACB,ACVR2B,ADAMTSL2,ADRA1B,ANGPT4,ANKMY1,ANKRD23,AP4B1,ARHGAP9,ARRDC2,ARSA,ASB2,ASF1B,ASS1,BARHL2,BEST2,BRCC3,BSX,BTAF1,C16orf74,C18orf19,C19orf25,C1orf87,C21orf2,C21orf33,C2orf70,C3orf25,C7orf64,CACNA1G,CACNB3,CALM1,CAMK2N2,CATSPER3,CCDC116,CCDC120,CCDC28A,CCDC28B,CCL26,CCNE1,CCRN4L,CD70,CDC25C,CDH22,CEP164,CHMP4B,CLTCL1,CLU,CNKSR1,COPS3,CPSF3L,CREB3L1,CTDP1,CUEDC1,D2HGDH,DDB1,DDX56,DNAJC…
hsa-miR-615-3p	AARS2,ABCC10,ACBD4,ACTN1,ADAM15,ADH6,ADHFE1,ADPGK,ALDH1L1,AMDHD1,ANGPTL4,ANKK1,ANKMY1,ANKRD33,ANKRD33B,ANKS3,ANO10,ANO9,AOAH,AP1B1,AP2A1,AP2A2,AP3D1,APOB,ARHGAP44,ARHGEF10L,ARHGEF25,ARHGEF9,ARRDC2,ASB2,ASIP,ASPRV1,ATG4A,ATP13A1,ATP4A,ATP6V0B,ATP9A,AVPR2,B3GALT6,B3GNT8,B4GALT7,BAI2,BAIAP2L2,BARHL1,BARX1,BATF,BCL3,BCL6B,BDKRB1,BIN2,BIRC7,BRD8,BRSK2,BYSL,C10orf93,C11orf20,C11orf83,C11orf95,C14orf80,…
hsa-miR-615-5p	ABCF3,ABHD14A,ABHD14B,ABHD8,ABI3,ABP1,ACADS,ACCN4,ACCSL,ACSBG2,ACTL9,ADCK4,ADORA1,ADRA1B,AGPAT2,AHSA1,ALDH1L1,ALKBH6,AMH,ANAPC11,ANO7,ANO8,AP1S1,AP2A1,APBA3,APEH,APOA1BP,APOC1,ARAF,ARHGAP10,ARHGAP33,ARHGEF1,ARHGEF10L,ART5,ARTN,ASGR1,ASIP,ASPRV1,ATG2A,ATG7,ATP13A1,ATP13A2,ATP4A,ATP7B,AVPR2,B3GALT6,B3GNTL1,B4GALNT3,B4GALT3,B4GALT7,BABAM1,BARHL2,BARX1,BATF,BCL3,BHLHE23,BRAT1,BRMS1,C16orf71,C17orf50,…
hsa-miR-616	A1CF,ABCG5,ACER1,ACOT13,ADCK1,ADCK5,ADSSL1,AGXT,AHRR,AKAP5,AKTIP,ALMS1,AMELX,ANGPTL5,ANK1,APEX1,APOB,APOBEC2,ARAF,ASGR2,ATF2,AVL9,BAIAP2L2,BAX,BBOX1,BCAT2,BCMO1,BPIFA2,BRAP,BTG1,C11orf85,C14orf39,C16orf48,C19orf53,C1QTNF9B,C1orf177,C21orf7,C4orf37,C5orf32,C6orf201,C9orf150,CABP4,CALY,CASP3,CASP9,CBS,CCDC136,CCDC28A,CCDC60,CCL22,CD19,CD9,CDH18,CDHR4,CDKAL1,CENPC1,CEP68,CES4A,CHCHD1,CHGB,CHRND,CIRB…
hsa-miR-616_star	AADAT,ADORA3,ADRB2,ALG6,ANKRD10,ASGR2,ASTN2,ATP8B2,BAG1,BRD2,C9orf41,C9orf46,CCDC38,CCL2,CNOT10,CNTRL,COMMD8,CTNNAL1,DDX25,DLL3,DRG2,ELOVL3,ERAS,EXOC1,FAM161B,FBXW2,FKBP4,GDPD2,GLE1,GUCY1A2,HSD11B1,HSP90AA1,INPP1,KCNQ2,KIAA2013,LAMA1,LRRIQ3,METTL21C,MGAT2,MRPL43,NETO1,OAT,OR10AB1P,PDE4DIP,PIK3C3,PNCK,PNRC1,PRKRIP1,PRPS1,PTX3,RAD54L2,REPS1,RER1,RIOK2,RIT2,RPL23,S100A4,SDHAF1,SFT2D2,SLC12A1,SLC17A2…
hsa-miR-617	ABCB10,ABCC8,ACACB,ACSBG2,ACTL6B,ADAD1,ADAR,ADCK1,ADPRHL2,AHCY,AHR,AIRE,AKAP5,ANKHD1,APOA1BP,APOD,AQP9,ASPN,ASRGL1,ATP9A,ATXN2,B4GALNT3,BABAM1,BAD,BASP1,BICD1,BPIFB4,BST2,BTG1,C14orf109,C15orf59,C17orf39,C17orf47,C19orf28,C19orf57,C1orf192,C1orf54,C1orf61,C1orf74,C3orf33,C3orf37,C7orf29,C7orf36,C9orf103,C9orf153,C9orf4,C9orf9,CAPN9,CCDC104,CCL4,CCL4L1,CCL5,CD14,CD164L2,CDIPT,CETP,CHD8,CHRM1,CHRNA…
hsa-miR-618	ABCA7,ADRBK2,ALG14,ALKBH3,ANKRD58,ANO1,APBB1IP,APCDD1,ARHGAP25,ARHGEF26,ARPP21,ASB9,ATAD5,ATP13A4,ATP6V1E2,ATP6V1H,ATXN10,B3GNT2,BBS9,BCAP31,BMP15,BPGM,BPY2,BRD9,BUB3,C10orf112,C11orf52,C11orf57,C12orf66,C19orf51,C19orf71,C1S,C1orf186,C20orf24,C3orf25,C6orf127,C7orf25,C7orf72,C9orf95,CATSPER1,CBX8,CCBL1,CCDC14,CCDC65,CCL26,CCR2,CD2,CD55,CKB,CLCC1,CLDN14,CLTA,CNN1,COL17A1,COMMD1,CRYZ,CTIF,CTNNB1,C…
hsa-miR-619	ABCC4,ACCN1,ACOT12,ADAMTSL4,ADIG,ALG12,ANKRD6,AP2M1,APBB1,APOA1BP,AQP8,ARAP1,ARID3A,ARL2,ARMC5,ASB10,ATP12A,AVL9,BCAN,BTBD11,C12orf44,C12orf62,C18orf56,C19orf56,C1orf35,C20orf85,C3orf25,C4orf48,C6orf126,C6orf141,C6orf221,C9orf23,C9orf89,CALB2,CAMSAP3,CARNS1,CCBL1,CCDC167,CCDC25,CCDC64B,CCDC70,CCDC88B,CD63,CDA,CDC34,CDH24,CENPT,CER1,CERS4,CFTR,CHIC1,CLEC2D,COG4,COL6A2,COPS7B,COX6C,CPN1,CPSF3L,CPSF…
hsa-miR-620	ACAD10,ACSM3,ADH6,ADK,AFP,AGA,AHI1,AKAP3,ANKRD55,ANXA1,ANXA3,ANXA6,APH1A,APOB,APOBEC3B,ARAF,ARHGAP9,ATAD5,ATG16L2,ATP12A,BAI2,BBOX1,BCAS4,BOLA3,C11orf63,C16orf61,C19orf51,C1orf101,C1orf51,C20orf7,C22orf42,C3AR1,C6orf15,C6orf163,CABS1,CALY,CBWD1,CBWD3,CBX8,CCBL2,CCDC141,CCDC165,CCDC82,CCDC96,CDK5R2,CDKAL1,CENPJ,CERS4,CETN1,CHRD,CIR1,CLASRP,CLTB,CMTM8,CNDP1,CNTN3,COBL,COG5,COL11A1,COL20A1,COPS3,CRE…
hsa-miR-621	AATF,AATK,ABCB6,ABHD11,ABL2,ACOT6,ACTG1,ACTN1,ACTR5,ACVR1,ADH5,AGPAT2,AHSG,AKAP3,ALDH1A2,ALDH4A1,ALKBH3,ANK1,ANK2,ANKRD35,APBB1IP,APOD,AQP9,ARFGAP2,ARFIP2,ARHGDIB,ARMC4,ASB1,ASPG,ASRGL1,ATAD3B,ATG4D,ATP5G1,B3GNT7,BEST2,BID,BOLA2,BOLA2B,BPGM,BTBD17,BUD13,BYSL,C11orf24,C15orf27,C17orf81,C19orf29,C1orf131,C1orf74,CABP1,CACNA1B,CACNG4,CALHM3,CAPN12,CBLB,CCDC116,CCDC134,CCDC167,CCDC27,CCDC37,CCDC85B,C…
hsa-miR-622	ABHD11,ACADS,ADAMTS12,ALKBH5,ALOX5,AMIGO2,ANGPTL4,APBB1IP,AQP5,AQP8,ARF4,ARTN,ASPHD2,ATF2,AXIN2,B3GALNT2,BATF3,BFSP2,BTK,BTNL8,BUB1B,C10orf71,C11orf49,C14orf133,C15orf55,C17orf46,C17orf79,C17orf81,C1orf131,C22orf28,C2orf47,C2orf72,C6,C6orf94,C9orf68,C9orf80,CACNG1,CAMK1G,CAT,CBLN2,CCDC130,CCDC134,CCDC86,CCL3,CCL3L3,CCNI,CD79A,CEACAM21,CECR2,CHRND,CHTF18,CIDEC,CLEC4C,CLK1,COL8A2,COLQ,CRTC3,CSF1R,C…
hsa-miR-623	ABCA2,ABCF3,ABHD14B,ABHD16B,ADPRHL2,AGPAT2,AGXT,ALDH16A1,ALPL,AMDHD1,AMIGO1,AMT,ANK1,ANKHD1,ANKRD13D,ANKRD33,AP2S1,APOBEC2,AQP3,ARFGAP3,ARHGAP28,ARID3A,ARPC2,ATG2A,ATP2C2,ATXN7L3,BASP1,BBX,BCAN,BEGAIN,BIRC2,BLMH,BTBD17,C14orf1,C19orf28,C19orf71,C1S,C20orf201,C2orf51,C8G,CACNA1A,CACNA1H,CAPN12,CBLC,CCDC110,CCDC116,CCDC167,CCL17,CCL27,CD27,CDA,CDH20,CDH23,CDK20,CHI3L1,CHRNA10,CHRNA2,CHST11,CIB4,CIR…
hsa-miR-624	ACAD8,ADAM10,AMIGO2,AMZ2,ANAPC5,ANGPT4,ARL14,ASCL3,ATAD5,ATF7IP,ATP2A1,B3GAT3,BAMBI,BBOX1,BBX,BCCIP,BCMO1,BEND7,BFSP2,BIRC2,BRCA2,BTBD8,BUB1B,C12orf66,C15orf26,C15orf40,C16orf87,C20orf111,C20orf85,C2orf43,C4orf33,C9orf156,CALCB,CAPRIN2,CCDC132,CCDC136,CCDC14,CCNYL1,CD22,CEP290,CFLAR,CHRNA6,CLEC3A,CLN3,CNOT1,COL10A1,COPS4,CPNE1,CPNE2,CRYAB,CTNNB1,CWC25,CWC27,CX3CR1,CXorf64,DHDH,DHRS7B,DHX58,DLX6,D…
hsa-miR-624_star	ABCB6,ABHD16B,ACOX2,ADAM2,ADCY10,ADCYAP1R1,ANKZF1,ARHGAP9,AVPR1B,B3GALT1,BRD8,C14orf39,C18orf19,C1QC,C1orf182,CCDC18,CLUAP1,CNTRL,COL7A1,CYP2A7P1,CYTL1,DALRD3,DDX56,DHRS4,DHRS4L2,DHX29,DOCK11,DUS2L,EDF1,ESYT1,EXOSC10,FAM193B,GAL3ST1,GPR37,GSTA4,HMGN1,HSD17B6,HSPB3,ILF2,JAM2,KLRB1,LCE2D,MEGF6,MIA3,MYOT,NEU3,NOXRED1,NPHP4,NXT2,OBSCN,OMG,OR5J1P,PCDHB2,PHLDB3,PKIG,PRDM9,PRIM2,RALGPS1,RAMP1,RBM33,RGS1…
hsa-miR-625	ABCC3,ABCF3,ABHD16A,ACTL6B,ADH1A,AKT1,AKT2,ALDH16A1,ALPK1,AMN,ANKFN1,ANKIB1,AP2A1,APOD,APOM,APOOL,ARIH2,ARL6IP4,ASNA1,ATG7,ATP12A,ATP2A1,ATP6AP2,ATXN7,AVPI1,BAD,BAIAP2L2,BAX,BIN1,BMS1,BPI,BTBD16,C11orf73,C12orf11,C15orf60,C1orf172,C4orf6,C7,CALCOCO1,CAPN1,CASP9,CCDC101,CCDC42,CCDC56,CCL11,CDK4,CERS2,CLCNKB,CLDN11,CLN3,CNDP1,COL20A1,COL8A2,COPB1,COPZ2,CPT1B,CRABP1,CRCT1,CSGALNACT2,CTDP1,CYHR1,DCTP…
hsa-miR-625_star	ACTR10,APH1A,ATF7IP,C12orf60,C7orf25,C9orf84,CD97,CLCN5,CRB1,CRISP1,CTXN3,DDX1,ESD,FADS1,FRAS1,GLRA4,GPR89A,GPR89B,HIST1H2BB,HSPA8,IL19,KIAA1217,KIAA1279,LHX8,MCM5,MCM8,MORN5,NBPF24,NETO1,NIPSNAP3B,NSUN3,NUP37,PFKFB1,PHACTR1,PLXDC2,POLR2J2,PSME2,RAB3IP,RAD1,RFPL3,RNASE10,RNF13,RNGTT,RPAP1,SERAC1,SLC7A13,SOD1,SORBS1,SSX2IP,ST8SIA3,TBC1D3G,TIMM17A,TMED5,TMEM187,TMEM87B,WDR67,WRAP73,ZNF554,ZNF773
hsa-miR-626	AANAT,ABCF2,ABCF3,ABHD14A,ACLY,ACPP,ADAMTS8,ADPGK,AGXT,AKIRIN2,AKR1E2,ANKRD42,ANO7,APLP1,APOBEC4,ARHGAP20,ARHGAP25,ART5,ASCL3,ASPHD1,ATP6V0B,ATP9B,B3GNT6,B4GALT4,BACH2,BTBD6,BUB1,C10orf93,C14orf118,C14orf177,C15orf17,C16orf48,C17orf56,C17orf72,C17orf80,C1QL2,C1orf127,C1orf177,C20orf103,C20orf177,C22orf15,C7,CALHM3,CAMSAP1,CAPN12,CASP14,CCDC102B,CCDC23,CCDC42,CCKAR,CD320,CDH4,CDKL3,CENPV,CEP72,CHG…
hsa-miR-627	A4GALT,AAMP,ABCC2,ACBD4,ACTR5,ADAMTS17,ADCK1,ANKRD22,AP3B2,APOA1BP,APOC2,APOE,APOOL,AQP11,ARL1,ARNTL2,ASCC1,ASPHD2,ATP4A,ATP8A2,ATP8B1,ATPAF2,BACE2,BCCIP,BEND5,BPY2,BRI3,BUB1B,C10orf81,C14orf166,C14orf177,C22orf28,C2orf42,C7orf11,C9orf9,CACNA1C,CALR,CATSPER2,CCDC101,CCDC66,CCDC73,CCNYL1,CDCA3,CDKL3,CEP120,CHGB,CHMP5,CMTM5,COLQ,COMMD10,CRHR2,CSN3,CSNK1G3,CTSH,CTSL2,CUEDC1,CXCR6,CYP2F1,CYP4B1,DBH,D…
hsa-miR-628-3p	ABRA,ACOT12,ACYP1,AGXT2L1,AHNAK2,AJAP1,AKAP10,ALDOB,ALS2CR11,ALS2CR12,ANAPC11,ANKRD26,ANKRD58,ANUBL1,ANXA7,APBB1IP,APOD,AQP9,ARHGAP6,ARHGEF10,ARMC2,ARMC4,ASNSD1,AVL9,BAG2,BEND5,BPGM,BRAP,BRIX1,BRP44L,C10orf96,C11orf10,C11orf53,C12orf26,C16orf92,C17orf57,C20orf123,C20orf20,C21orf7,C3orf22,C5,C5orf34,C6orf186,C7orf68,CABS1,CACNG3,CALCA,CALHM2,CAPN8,CASP14,CASP8AP2,CBLB,CBWD1,CBWD3,CBWD5,CBWD6,CCDC1…
hsa-miR-628-5p	AARS,ABCC5,ABHD13,ABRA,ACCN4,ACTR5,ACVR2B,AHI1,AHR,AHRR,AKAP5,ALDH1L2,ALS2CR11,ALS2CR12,ANGPTL3,ANGPTL6,ANK3,ANKRD17,ANKRD26,ANKRD30BL,AP4B1,ARHGAP6,ARL1,ARMC4,ASCC3,ASRGL1,ATF7IP2,ATG2A,ATP13A1,ATP2A2,ATP6V0E1,ATP8B3,B3GALT1,BBS4,BCL6,BEND5,BEX2,BEX4,BMP1,BMP2K,BRD9,BRE,BTBD6,BTD,C10orf58,C11orf53,C12orf51,C16orf92,C17orf109,C17orf81,C19orf51,C19orf70,C1QL3,C1orf56,C4orf19,C5orf44,C6orf15,C6orf5…
hsa-miR-629	ABCC8,ACYP1,ADAM10,ADAMTS6,AKNAD1,AKR7A2,ALG14,ALKBH1,ALOX12,AMBP,AMIGO2,AMN,ANKHD1,ANKRD6,ANO7,AP2S1,APH1B,APOBEC3H,APOE,ARG1,ARL9,ASB11,AXDND1,AZGP1,BAALC,BCAN,BEX5,BMP2K,BPIFA3,BPIFC,BTNL3,BUB1,C11orf35,C11orf53,C16orf79,C1QC,C1orf131,C1orf182,C20orf103,C2orf53,C5orf41,C6orf146,C6orf154,C9orf30,CABP4,CALHM2,CAMKMT,CBLL1,CBLN1,CCDC111,CCDC12,CCDC129,CCDC27,CCL21,CCNA2,CD19,CD37,CDH11,CDH15,CDY1…
hsa-miR-629_star	ADAD2,ALDH3A1,ALKBH4,ANKRD34A,APOM,BEND6,BRD3,C6orf48,CBY1,CCHCR1,CD300A,CUTA,DAOA,DYNLT1,ECE2,EIF4A1,ELOVL3,ENGASE,ENSA,EPS8L1,ETNK2,FAM3B,FAM50A,FHAD1,FREM1,HSD17B10,LCE2B,LRFN2,MAP3K11,MOV10,NKX2-5,OR52H1,PDIA3,PPFIA3,PPP1R14D,PPP2R1A,PRPF31,PTAFR,RPL35,RTP2,SH3GLB2,SLC39A7,TAGLN,TGM1,UQCR10,XPO7,ZCWPW1,ZNF687,ZNF700
hsa-miR-630	ABCC2,ACCS,ADH5,ADHFE1,ADRA1D,AKAP10,AKAP14,AKR1B10,ALDOB,ALG14,ALX1,AMBN,AMZ2,ANK1,ANKRD30A,AP3B1,APOL5,ARF4,ARL6,ASPH,ATP6V0C,AVPR1A,BHLHE40,BLMH,C10orf128,C11orf82,C12orf59,C15orf48,C16orf89,C16orf91,C17orf57,C18orf56,C19orf2,C2orf42,C3orf30,C3orf67,C9orf43,CA11,CA6,CA8,CABS1,CALCB,CAPS2,CCBL1,CCDC92,CCL13,CD109,CDC27,CEP192,CHGB,CHMP4C,CIB4,CIDEB,CKAP2,CLCA4,CLDND2,CLSPN,CNIH4,CNTLN,COL13A1,C…
hsa-miR-631	ABCD4,ABCF3,ABHD8,ACIN1,ACSS2,ACTN4,ADAMTS17,ADCY1,ADPRHL2,ADSL,ALPK2,ANKHD1,ANKRD58,APLN,AQP5,ARHGAP22,ARHGAP30,ARHGAP4,ARHGEF4,ARHGEF40,ARVCF,ASB6,ATN1,ATP5D,B3GALNT2,B4GALT2,B4GALT7,BAD,BAP1,BARX1,BARX2,BCAT2,BEST2,BNC1,BST2,BSX,BYSL,C10orf125,C11orf49,C11orf80,C11orf95,C12orf44,C14orf180,C14orf80,C19orf26,C19orf53,C1QTNF6,C1orf94,C20orf173,C20orf20,C20orf96,C22orf39,C22orf40,C3orf18,C6orf145,…
hsa-miR-632	AARS2,ABHD12,ABP1,ACAA1,ACVR2B,ADAMTS8,ADC,ADK,ADRA1B,AKAP10,AKR7A2,AMELX,ANKS3,APOBR,AQP5,ARID5A,ASF1B,ASIP,ASRGL1,ATP12A,ATP2A2,ATP6V0B,B3GNTL1,BCL2L11,BCL6,BMS1,BPIFB2,BRD3,BTBD7,BTBD8,C10orf82,C10orf93,C11orf49,C11orf80,C12orf52,C13orf33,C17orf53,C19orf46,C19orf71,C1orf43,C20orf160,C5orf4,C7orf68,C9orf71,CA7,CACNA1A,CACNA1F,CALN1,CARHSP1,CARKD,CARM1,CC2D1A,CCDC105,CCDC130,CCDC37,CCDC62,CCDC88…
hsa-miR-633	AADAC,ABCA9,ACSL5,ACSM3,ACYP1,ADORA2B,ADRA1A,AKIRIN1,AMBN,AMPD1,ANKRD9,ANUBL1,ANXA10,ARHGEF25,ARHGEF40,ASB9,ASF1A,ATL1,ATOH7,ATP6V1E2,BANK1,BCL3,BCOR,BMP2,BRF1,BRIX1,C12orf24,C12orf40,C14orf39,C1orf101,C20orf112,C4BPA,C5orf34,C6orf146,C6orf163,C7orf36,C7orf63,C8orf47,C8orf48,C9orf78,CAB39,CCDC58,CCK,CCL2,CD163,CDH9,CENPW,CER1,CETN3,CFH,CFHR2,CHCHD7,CHGB,CMPK1,CMTM8,CNOT10,CNTN1,CNTN6,COPB2,CPNE2,…
hsa-miR-634	AARS2,AATF,ABCC10,ABCG4,ABI1,ACVRL1,ADAMTS2,ADRB2,AGAP3,AHSP,ALDH4A1,AMDHD2,ANGPTL4,ANKRD37,ANKZF1,AQP5,ARHGAP22,ARHGAP35,ARHGAP9,ARL6IP4,ARPC1B,ARPP21,ASB1,ATP13A1,ATP6V0B,ATP6V1F,ATP8B3,AVEN,B3GNT1,BCL2L12,BCL6B,BIK,BIN2,BMS1,BPIFB3,BRF2,C11orf42,C16orf70,C17orf70,C19orf45,C19orf59,C1QTNF6,C1S,C20orf46,C2orf78,C3orf20,C7orf64,C9orf24,CAMK2A,CCDC116,CCDC167,CCDC169,CCDC22,CCDC81,CCDC88B,CCL19,CC…
hsa-miR-635	AAMP,ABCC8,ACE,ACTR8,ADCY10,ADRA1A,AGAP4,AGAP5,AGAP6,AGAP8,AGBL5,AKR7A3,ALS2CR12,AMDHD2,AMH,ANGPTL3,ANGPTL6,ANKRD6,APBB1IP,ARFIP2,ARHGAP15,ARHGAP40,ARHGEF16,ARHGEF25,ARSH,ASAP3,ASB7,ATRNL1,B4GALT7,BASP1,BATF,BEST1,BEST3,BMS1,BRSK1,BTBD6,C16orf92,C17orf39,C17orf53,C17orf80,C18orf10,C19orf29,C19orf75,C6orf136,C7orf33,C8orf34,C9orf169,C9orf37,C9orf46,C9orf68,CCDC102A,CCDC107,CCDC167,CCDC56,CCDC61,CD…
hsa-miR-636	ABCA3,ABCC6,ABCF2,ABHD2,ACO1,ACOT12,ACTN1,ADARB2,ADPRHL2,AGR3,AGT,AKR7A2,AMH,ANK1,ANKHD1,ANO10,ANXA13,AOC2,AP3M1,APBB1IP,APOBEC3H,ARFIP1,ARID1B,ASCC2,ATOH7,ATP1B1,AUP1,AZI1,BAI1,BARX1,BATF3,BCL7B,BRAP,C10orf35,C10orf81,C11orf41,C15orf52,C19orf71,C19orf80,C20orf165,C20orf85,C3orf21,C7orf59,C8orf34,CACNA1G,CBY1,CC2D1A,CCDC154,CCDC22,CCDC59,CCDC94,CCNE1,CD2,CD320,CDSN,CDX1,CETN2,CHFR,CLDND2,COL9A3,C…
hsa-miR-637	ABCC10,ABCC11,ABTB2,ACADS,ACCN2,ACPT,AGXT,AIFM3,AKR1E2,ALKBH6,ANO7,ANO8,AP2A2,ARHGAP33,ARID5A,ARVCF,ATP13A2,ATP6V0D1,AVPR2,AZI1,BARX1,BATF,BIN1,BPIFB4,BRMS1,BYSL,BZRAP1,C10orf116,C10orf71,C16orf71,C16orf74,C17orf70,C19orf20,C19orf53,C19orf56,C19orf71,C1orf85,C2,C22orf36,C2orf53,C2orf61,C5orf46,C7orf43,C9orf142,CABP4,CADM4,CAND2,CAPNS1,CARD11,CCDC101,CCDC130,CCDC88B,CCDC88C,CD320,CD7,CD72,CD79B,CD…
hsa-miR-638	ABCB9,ABCC3,ABCF2,ABHD8,ACHE,ACRBP,ACTN4,ADAT3,ADD1,AGPHD1,ANO10,AP2S1,APBB1,APCDD1,ARHGAP27,ARHGAP39,ARHGDIA,ARHGEF1,ASIP,ASPDH,ATG9A,ATMIN,ATN1,ATP1A3,ATP2C2,ATP6V1B1,ATXN7L1,B4GALNT4,BCAT2,BTBD2,C10orf116,C17orf56,C1QC,C1QL2,C1QTNF1,C1orf123,C1orf220,C2CD3,C2orf81,C4orf36,C7orf50,C9orf86,CALML5,CAPS,CASP9,CCDC106,CCDC116,CCDC24,CCDC42,CCDC88B,CCNB1IP1,CD79B,CDH24,CDK5RAP3,CFP,CGB8,CHAF1A,CHRNE…
hsa-miR-639	AATK,ABCA4,ACCS,ADAL,ADAM33,ADCK3,AGAP2,AGFG2,AMICA1,ANKRD54,APRT,ATG4D,ATP8A2,BAI1,BAIAP2L2,BPHL,C12orf65,C14orf70,C15orf17,C19orf43,C1QTNF4,C1orf131,C1orf27,C20orf160,C5orf38,CAMK2N2,CAPN1,CAT,CCDC81,CCKBR,CCNO,CELSR2,CENPM,CHMP4B,CNN1,COG4,CSMD1,CTRC,CTSH,DCC,DDB2,DEGS2,DLEC1,DOLK,DSG2,DUOXA1,DYNLL2,EIF5A,ELMO3,EMILIN1,ENGASE,ENPP7,ERN2,EXOC3L2,F10,FADS1,FAM105B,FAM163B,FCGBP,FES,FGF3,FGFBP1,G…
hsa-miR-640	ABCB9,ACER1,ACIN1,ACP2,ACTR3,ACTR5,AFG3L1P,AGPHD1,AHR,AIG1,ALDH2,ALKBH6,ALPK2,ANXA9,AP4B1,APOL2,ASB1,ATP6V0A4,ATP9A,B4GALT2,BBS2,BCDIN3D,BLNK,C11orf63,C11orf75,C16orf62,C1orf172,C20orf103,C20orf173,C20orf96,C2CD4C,C2orf54,C4orf43,CASC5,CASQ1,CAT,CCDC147,CCDC165,CCDC22,CCL5,CCNA1,CD84,CDH20,CECR2,CENPL,CENPM,CHST8,CINP,CITED4,CLIC1,CLSPN,CLTA,CLVS2,CMBL,CNPY2,COX8A,CSAD,CSF2RA,CTNNAL1,CTRC,CXorf40…
hsa-miR-641	ABHD5,ACADL,ACOT4,ACTA2,ACTR5,ACYP2,ADAMTSL1,ADRBK2,AFF4,AGR3,AHSA1,ALS2CR8,ANUBL1,AOAH,AP3B2,ARMC4,ARPC3,ASPHD1,ASTE1,ATF3,ATP12A,ATP6V0A4,BARHL2,BCL2L10,BTD,C1QL2,C20orf196,C7orf46,C7orf68,C8orf48,CAP2,CAPN12,CAPN13,CCDC122,CCDC75,CCT6B,CDCA3,CDK2AP2,CENPC1,CEP152,CFDP1,CHAMP1,CLDN14,CLDND1,CLK2,CMTM8,CNPY2,COG5,COL22A1,COL4A3BP,COQ3,CORT,CPT1C,CTH,CTNNB1,CXCL17,CYTL1,DCTN6,DEFB128,DGKE,DNAH8,D…
hsa-miR-642	ABL2,ACBD7,ACP5,ACTN4,ACTR1B,ADAMTS10,ADAMTSL2,ADRA1A,AEBP1,ANK1,ANKRD56,AP1M2,AP2A1,APBB1,APBB1IP,APOM,AQP5,ARF5,ARHGEF25,ARID3A,ARPC1B,ARPC5L,AS3MT,ASPRV1,ATN1,AZGP1,BARX2,BIN2,BMS1,BNIP1,BRSK1,BTK,C10orf28,C10orf35,C10orf93,C11orf75,C15orf38,C17orf81,C19orf56,C3orf22,C3orf45,C5orf45,C9orf128,C9orf169,C9orf43,CA9,CAPRIN2,CCDC60,CCND3,CCS,CD164L2,CDHR2,CDK5,CEACAM3,CHD3,CHRNA10,CHRNB3,CHST11,CLC…
hsa-miR-643	AADAC,AADACL4,ABCF3,ACAA1,ACP2,ADAM22,AGA,ALX1,AMPD1,ANKS4B,ANXA1,APOL5,APOO,ARPC1B,ATF7IP2,ATP6V1D,ATP9A,ATRNL1,AVIL,BAG2,BCAR3,BCL2L10,BCMO1,BCOR,BLOC1S2,BMPR1A,BTG3,C10orf107,C10orf67,C12orf11,C12orf24,C12orf48,C14orf149,C15orf24,C16orf91,C3orf30,C6,C6orf164,C6orf48,C7orf36,C7orf46,C7orf58,C7orf61,C7orf64,C8B,CCDC59,CCDC70,CCDC90B,CCRL1,CCRL2,CCT2,CDADC1,CDH18,CDKL3,CDY1,CENPK,CHAMP1,CHIC1,CHR…
hsa-miR-644	ABCD4,ABP1,ACSBG2,ADAMTSL1,ADORA2B,AGBL5,AGPAT4,AICDA,ALPK2,AMBRA1,ANGPTL6,ANKRD33B,APBB1IP,APEH,APOD,APOH,APRT,ARHGEF10L,ARHGEF16,ARID3A,ARID4B,ARMCX5,ARPC1A,ARSJ,ASPG,ATP2C2,ATP5B,ATP5D,ATP5E,ATP6V1B1,ATP8B1,ATRIP,BEST1,BICD1,BNIP1,BOC,BTD,C10orf122,C10orf57,C15orf42,C16orf48,C16orf89,C19orf18,C19orf56,C1orf192,C20orf26,C21orf62,C2orf72,C3orf22,C8orf84,C9orf71,C9orf82,CAPS,CC2D1A,CCDC134,CCDC16…
hsa-miR-645	A4GALT,AARS,ABCB9,ABHD11,ABHD14A,ABL2,ACOXL,ADAL,ADAM7,ADAMTSL1,AHSG,ALG8,AMBRA1,AMN,ANPEP,APCDD1,APLP1,AQP8,ARF5,ARHGAP10,ARL6IP4,ATP1A1OS,ATP8B2,BCAP29,BCKDK,BCL2L11,BEST3,BLK,BMPR1B,C14orf80,C15orf26,C15orf59,C16orf48,C19orf56,C20orf29,C9orf117,C9orf47,C9orf64,CAPN1,CAPNS1,CCDC142,CCHCR1,CCL21,CD19,CD68,CD99,CDA,CDC34,CDCP2,CENPB,CENPL,CIB1,CIB2,CLVS2,COL17A1,COQ5,CRTAM,CTSH,CYB561D2,DDAH2,DDB…
hsa-miR-646	AATF,ABCC10,ACCN4,ACSBG2,ACVR2B,ADAD2,ADAMTS12,ADCYAP1,ADRA1B,ADRA1D,AFM,AGBL5,AKIRIN1,ALKBH3,ALX1,AMN,ANKRD33,AQP11,ARHGAP4,ARL3,ARPC1B,ASB12,ASL,ASPSCR1,ASS1,ATG4D,ATN1,ATP2A1,AVIL,B4GALNT4,B4GALT2,B9D2,BAG3,BID,BIN1,BIN3,BOLA3,BPIFA1,BPIFC,BRAP,BRP44L,BRSK2,C10orf96,C11orf42,C12orf63,C15orf23,C15orf44,C16orf79,C17orf56,C17orf99,C18orf21,C19orf56,C1orf114,C6orf136,C6orf27,C7orf53,CA6,CABP1,CAD,…
hsa-miR-647	ABCA4,ABHD2,ABHD6,ABI3,ACCS,ACSF3,ACTB,ACTR1B,ADAMTSL2,ADCK5,AIG1,ANKRD2,ANKRD22,ANO2,ANXA13,AP3B2,APBA1,ARHGAP22,ARHGDIA,ARHGEF40,ARPC2,ARPC3,ART5,ASB9,ASTN1,ATPAF2,AURKA,B4GALT7,BABAM1,BICD1,BPIFB1,BRSK2,C10orf116,C10orf120,C10orf93,C11orf80,C12orf34,C14orf159,C16orf46,C16orf57,C16orf92,C17orf101,C19orf10,C19orf59,C19orf6,C1orf127,C1orf65,C3AR1,C3orf25,C3orf27,C5orf46,C6orf136,CACNA1G,CACNA1H,C…
hsa-miR-648	ABHD16A,ABHD4,ABTB1,ACO1,ACOX3,ACTR5,ADA,ADAD2,ADAM21,ADCK1,ADIPOR1,ADRM1,AGR3,AGTRAP,AHI1,AK7,AKAP10,AKAP4,AKT2,ALDOA,ALG13,ALOX5,ALS2CL,ANK1,ARFGEF1,ARHGEF4,ARHGEF40,ARID5A,ARL4D,ARMC3,ART3,ARX,ATP12A,ATP2B3,ATP8A2,BARX1,BATF3,BCAR3,BEX5,BLOC1S2,BOK,BPHL,BRIX1,C12orf53,C14orf102,C14orf2,C16orf78,C17orf62,C19orf26,C1orf85,C20orf85,C22orf15,C6orf154,C8B,C9orf5,C9orf68,CA8,CAD,CAMK1G,CAPNS1,CARD10…
hsa-miR-649	AKIP1,AKIRIN2,ALG13,ALS2,AP1M1,APH1A,ARID3A,ARL1,ASB11,ASB3,ASB5,ASXL1,ASZ1,ATL1,ATL3,ATP5A1,ATP5F1,ATP6V1G3,B3GNTL1,B4GALNT3,BBX,BDH1,BID,BOD1L,BORA,BUD31,C10orf137,C10orf71,C10orf88,C14orf49,C19orf53,C20orf132,C5orf25,C5orf42,C5orf45,C9orf3,C9orf85,CALHM3,CCDC116,CCDC14,CCDC59,CCL27,CD101,CD302,CD69,CDKN1B,CHFR,CHST13,CIB1,CKAP2,CLN5,CLPX,CNTNAP3,CNTNAP3B,COG8,COL16A1,COQ2,CRMP1,CUTC,CUX1,CXCL1…
hsa-miR-650	ABCG4,ACTA2,ADAM15,ADAT3,ADCK4,AGAP3,AGPAT1,AIFM3,ALDH16A1,ALDOC,ALPK1,ANGPTL4,ANKHD1,ANKMY1,APOE,ARAF,ARHGAP39,ASB12,ASB2,AVPR2,B4GALNT3,BACE2,BANP,BCAM,BCAR1,BCAS4,BCKDK,BCL6B,BEND7,BPIFA1,BUB1B,C10orf82,C11orf82,C12orf51,C12orf52,C12orf53,C13orf15,C16orf42,C17orf50,C17orf72,C19orf56,C1orf85,C21orf49,C2orf28,C3orf20,C6orf27,C8orf85,C9orf16,CA5A,CACNB4,CALHM3,CALML5,CALR,CAPN10,CCDC167,CCDC59,CC…
hsa-miR-651	AADAC,AADAT,ACMSD,ACOT12,ACYP2,AHRR,AKIRIN2,AKR1E2,ALDH1A1,ANAPC1,ANKRD33,ANXA10,APLNR,APTX,ARGLU1,ARMCX5,ASNA1,ATG3,ATP5C1,BPHL,BRD1,BUB1B,BZW1,C10orf10,C10orf112,C11orf31,C13orf27,C14orf166,C19orf51,C1QBP,C1orf100,C1orf141,C1orf172,C1orf177,C1orf53,C21orf7,C2orf80,C4orf26,C6orf108,C6orf47,C6orf48,C7orf23,C8orf85,C9orf131,C9orf135,C9orf46,C9orf71,CA2,CA3,CAPN13,CCL7,CCNG2,CD1B,CDC27,CEP152,CETP,…
hsa-miR-652	AARS,AATF,ABCC8,ABHD8,ACCN1,ACCS,ACO2,ADAM15,ADAP2,ADCK1,ADPGK,AGAP3,AIP,ALDH4A1,AOAH,AP2S1,APBA3,APCDD1L,APOA1BP,ARF5,ARHGAP21,ARHGEF1,ARHGEF18,ASB16,ASB8,ATP8B2,AXDND1,BIN1,BIRC7,BSG,BTK,BTNL9,C10orf116,C15orf40,C1QA,C2orf28,C3,C7orf50,C9orf3,CAMLG,CAPN13,CAPZB,CASKIN2,CASP6,CCDC110,CCKAR,CD79B,CDC42BPB,CDCA7,CDK10,CHD4,CHD5,CLDN20,CNTN5,COBRA1,COMMD7,CSMD1,CSN1S1,CTDSP1,CUL1,CYP17A1,DCST2,DCUN…
hsa-miR-653	ADH5,AFP,AGMO,AHSG,ALDH18A1,ALDH9A1,ALX1,AMTN,ANKRD5,ANO8,ANXA1,ARHGDIB,ARMC2,ATP6V0D2,BAZ1A,BEND7,BPY2,C11orf24,C11orf30,C1QBP,C2orf80,C3orf67,C4BPA,C5orf32,C9orf46,C9orf68,CABS1,CAGE1,CASC1,CASP5,CASP7,CBWD1,CBWD2,CBWD3,CBWD5,CBWD6,CBWD7,CCDC138,CCT5,CD36,CENPB,CENPT,CENPV,CEP152,CEP192,CES5A,CFP,CHRNA3,CHST14,CKAP2,CLDN20,CLU,CLVS2,CNTNAP4,COL4A4,COPS3,CR1,CRISP1,CTBS,CXCR4,CYB5D2,CYP4B1,DAZAP…
hsa-miR-654-3p	ACAA1,ACO2,ACSF3,ADC,AFG3L1P,AGPAT1,AGPAT5,AHNAK,AKR1B10,ALPL,AMELX,ANKRD30A,ANO7,AOC2,ARAP1,ARHGAP25,ART3,ASB16,ATG2B,ATP2A2,ATP6V0A4,ATPIF1,B3GNTL1,BACE2,BAI2,BRAP,BRD9,BRIX1,C10orf122,C10orf35,C10orf71,C10orf93,C12orf52,C12orf54,C12orf57,C12orf62,C12orf63,C14orf109,C17orf56,C19orf28,C19orf48,C19orf59,C20orf173,C3orf77,C4BPB,C9orf116,C9orf23,CADM3,CAPN9,CARD11,CARHSP1,CASP10,CCDC105,CCDC142,CCD…
hsa-miR-654-5p	AANAT,AATF,ABTB2,ACP5,ACSF3,ACTN1,ACVRL1,ADC,AFG3L2,AGPHD1,AGTR2,ALPL,ALX3,ANAPC2,ANGPT4,ANO9,AP4M1,ARAF,ARHGDIA,ARMC5,ARR3,ART1,ASB16,ATG2A,ATP4A,ATP6V0A4,ATP6V0C,ATPIF1,ATXN7L1,AVP,AZI1,BACE2,BAI2,BATF,BBX,BIRC7,C10orf71,C12orf51,C13orf15,C15orf2,C15orf55,C16orf80,C17orf50,C17orf70,C19orf48,C19orf71,C20orf166,C20orf46,C4orf36,C7orf59,C9orf169,CABP2,CABP4,CACNA1D,CADM3,CARD11,CASKIN2,CASP10,CASP…
hsa-miR-655	ABCC10,ABI1,ABRA,ACOT9,ACSS3,ACTR6,ACYP1,ADRA1A,AGBL1,AGTPBP1,AIMP2,AK2,AK7,AKIRIN2,ANKRD34B,ANKRD44,ANKRD7,ANKUB1,ANXA7,AP2A1,APCS,APOBEC1,AQP11,ARFIP1,ARMC4,ART3,ASB12,ATP6V0A4,ATP6V1H,BAMBI,BIRC3,BLZF1,BRAT1,BST1,BUB1B,C11orf58,C12orf24,C17orf85,C18orf19,C1QL3,C1orf101,C20orf20,C3orf14,C4orf14,C6orf58,C8orf47,C8orf48,C8orf76,C9orf84,CALU,CAMLG,CAP2,CCBL2,CCDC73,CCNL1,CDKN1C,CDKN2AIP,CENPK,CEP2…
hsa-miR-656	A1CF,ABHD3,ACSM3,ACYP2,ADAMTS20,AKD1,ANAPC10,ANKRD7,ANXA1,ANXA7,AP4B1,APAF1,ARHGAP6,ARIH2,ATP6AP2,ATP6V0A2,BAI3,BARHL2,BCAR3,BCAS2,C10orf96,C11orf63,C13orf15,C18orf32,C18orf55,C1D,C1orf110,C1orf146,C4orf41,C6orf118,C6orf162,C6orf57,CALU,CCAR1,CCDC122,CCDC132,CCDC169,CCDC64,CCL8,CCNA1,CCT8,CDH11,CDH8,CENPC1,CENPK,CEP192,CETN3,CHST2,CHUK,CLCA4,CLVS2,CMTM8,CNKSR3,CPSF6,CTLA4,CTSL2,CYP26A1,CYP7B1,DCP…
hsa-miR-657	ABHD8,ACAD9,ACSBG2,ADAD2,ADAM15,ADH4,AGBL5,AKR1B1,ALDH8A1,AMPD1,AMT,ANKHD1,AP4S1,APLN,ARHGAP22,ARHGEF40,ATAD3B,ATP2B3,ATXN7,AVIL,BMP15,BPIFB2,BSCL2,C11orf10,C12orf44,C14orf101,C19orf21,C19orf44,C19orf51,C19orf56,C19orf59,C1orf35,C7orf51,C9orf21,C9orf3,C9orf5,C9orf50,CA9,CABP4,CAMK1,CAPS,CARS2,CBLN2,CCDC81,CCDC85B,CCDC94,CCNDBP1,CCNO,CD300LG,CD320,CD4,CDH15,CDH22,CDKN1C,CEACAM20,CEACAM3,CEP85,CHRN…
hsa-miR-658	AAMP,ABHD8,ACBD4,ACHE,ACRV1,ADAT3,ADCK4,AGBL5,AKAP7,ALPI,ALPK1,ALPL,ANGPT4,ANKRD2,AP2S1,APBA3,APOBR,APOE,APRT,ARAF,ARFGEF1,ARHGEF1,ARHGEF4,ARHGEF40,ARPC1A,ASB12,ASPSCR1,ATP5D,ATP6V0B,ATP6V1B1,ATXN2,AVPR2,BARX1,BEST4,BMS1,BRSK2,BTBD2,C10orf125,C15orf48,C18orf55,C1QC,C1QL1,C1orf159,C1orf86,C3orf25,C9orf86,CABP1,CABP2,CACNG3,CALB2,CALML3,CALML5,CALY,CAPN1,CCDC106,CD37,CDH24,COL6A2,CORO7,CPNE2,CPNE6,…
hsa-miR-659	ABCC10,ABHD14A,ACCN3,ACIN1,ACVR1C,ADAD2,ADAM29,AGTRAP,AIG1,ANGPT4,ANKAR,ANKRD2,AP2A1,APH1B,APPL2,ARHGAP42,ARHGAP6,ARID3A,ASMT,ATN1,ATP13A4,ATP6V0D1,B3GALNT2,B3GNTL1,BDKRB1,BLVRB,BOC,BPIFA4P,C11orf35,C11orf9,C17orf81,C18orf26,C1orf162,C1orf194,C1orf50,C2orf29,C3orf21,C3orf77,C6orf105,C7orf10,C7orf51,C8orf12,CABP1,CAMK1,CASC1,CATSPER4,CBLN4,CCDC162P,CCDC167,CCDC23,CCDC58,CCDC94,CCT3,CD8B,CDH20,CDH2…
hsa-miR-660	ABHD16B,ABLIM2,ACAA1,ACAD9,ACMSD,ACP5,ACSF2,ACY3,ADAMTSL4,AFF4,AFG3L2,AIFM1,AK2,AKAP9,AKNAD1,ANKLE2,ANKRD58,APOOL,APP,ARHGAP27,ARHGAP31,ARL6IP4,ARMC6,ART5,ATG16L2,BCAS4,BDKRB1,BIRC7,BMP5,BRIX1,BSND,BYSL,C13orf30,C15orf52,C17orf58,C19orf75,C7orf26,C9orf16,CABS1,CACNA1C,CALR,CAPN1,CCDC162P,CCDC83,CCHCR1,CD164L2,CD33,CD72,CER1,CHST11,CKAP2,CLK2,CLTCL1,CNPY3,COL16A1,COMMD9,CPNE7,CRTAC1,CSF3,CXorf69,C…
hsa-miR-661	ABHD11,ACAA1,ACAD10,ACOX3,ACSF2,ADAMTSL2,AGXT,AIG1,ALAS2,ALG12,AMDHD2,AMIGO3,ANKRD13D,ANO2,ANPEP,ARHGAP22,ARHGAP25,ARID5A,ARMC5,ARVCF,ASB10,ASPHD1,ATG7,ATP2C2,ATXN7L2,B3GAT3,B3GNT8,B4GALT7,BABAM1,BAI2,BCL6B,BIN1,C10orf93,C12orf34,C14orf80,C15orf27,C16orf71,C16orf89,C19orf29,C19orf71,C1QTNF4,C2orf62,C9orf169,CABP4,CACNA1H,CALY,CAPN1,CAPNS1,CCDC167,CCDC88B,CCDC92,CD320,CD7,CDC34,CDC42EP2,CDCP2,CDH2…
hsa-miR-662	ABCA7,ABCB8,ABCF3,ABHD12,ACP5,ACTN1,ADARB2,ADPRHL2,AFG3L2,AMPD1,ANKRD36B,ANO9,APEH,APOL2,APP,ARHGAP33,ASPG,AZGP1,AZI1,B4GALT7,BAX,BAZ2B,BCAR1,BEGAIN,BEST1,BIRC7,BRSK2,C10orf28,C10orf35,C10orf90,C12orf10,C16orf80,C19orf26,C19orf6,C1orf159,C2orf29,C2orf62,C6orf228,C9orf23,CAMK1,CBY3,CCDC22,CCDC61,CD40,CDC25A,CDC34,CDC42EP2,CDK9,CDT1,CFB,CFLAR,CHD8,CHID1,CHRNG,CLCN2,CLP1,CLSTN3,CMTM5,COQ2,CPSF4,CRB2…
hsa-miR-663	AATF,ABCA2,ABTB1,ACCN3,ACO2,ACTN1,ADAM33,ADAMTSL2,ADAP1,ADAT3,AIP,AMH,AMN,ANAPC2,ANGPTL4,ANKRD13D,ANO7,ANO8,APOE,ARAF,ARHGAP33,ARMC6,ARVCF,ATP2A1,ATP2C2,ATP5D,ATP6V0C,ATP6V1B1,AZU1,B4GALNT3,BAIAP3,BANP,BARHL1,BCAR1,BCKDK,BCL2L12,BEST2,BEST4,BHLHE23,BLK,BRSK1,BRSK2,C10orf125,C11orf95,C16orf42,C17orf50,C18orf10,C19orf22,C19orf35,C19orf56,C1QB,C1QL1,C1orf127,C1orf159,C1orf228,C1orf35,C1orf86,C22orf2…
hsa-miR-665	ACCN4,ADD1,AGXT,AHSA1,AKT1S1,ALKBH5,AMN,ANGPT4,ANKS4B,AP1M1,APBB1,APOE,APRT,ASB14,ATP4A,ATP5D,ATP8B3,B4GALNT3,BAIAP2,BCL3,BCL7B,BNIP1,C12orf62,C16orf7,C1QC,C1orf123,C1orf174,C1orf190,C1orf85,C20orf112,C20orf165,C21orf49,C22orf24,C3orf33,C4orf36,C5orf22,C6orf154,C6orf27,C6orf94,C9orf16,CACNA1G,CAMP,CAND2,CARHSP1,CARKD,CCDC106,CCDC135,CCDC167,CCL24,CCNF,CD320,CD79B,CDH1,CDH15,CDH24,CDKAL1,CHIT1,CID…
hsa-miR-668	ADAD2,AFG3L2,AGT,AMICA1,AMIGO2,APLNR,APOC1,AQP7,ARMC7,ARPC3,ARRDC2,ARVCF,ASL,ASPHD2,B9D2,BANP,C10orf116,C10orf93,C15orf62,C16orf42,C17orf72,C19orf28,C19orf52,C1orf94,C20orf151,C6orf57,C7,C8G,CAMK2G,CAPN12,CASC5,CCDC112,CCDC121,CCDC24,CCDC37,CDK10,CHADL,CIB3,CIITA,CNPY4,CORO1B,COX4NB,CPT1B,CST7,CTAG1A,CTAG1B,CTAG2,CTDNEP1,CTNNBIP1,CXorf31,DCTN3,DIRC2,DNAJB13,DNAJB5,DNAJC18,DOK3,DPM2,DPPA5,DTD1,DUS…
hsa-miR-671-3p	ABCA2,ABCC12,ABCF2,ABCF3,ABP1,ACAD8,ACBD5,ACBD6,ADAT3,ADCK2,AGPAT2,AKIP1,ALKBH6,AMBRA1,AMDHD2,AMIGO3,ANKHD1,APBB1,APH1A,APOA1BP,AQP3,ARHGAP40,ARMC2,ARMC5,ATP5D,ATRIP,AVPR2,B3GAT3,B3GNT8,BABAM1,BAIAP2L2,BARX1,BATF,BCAN,BCAP31,BCS1L,BEST1,BHLHA15,BMP1,BMS1,BNIP1,BRD2,BRF1,BRSK1,BTD,C10orf120,C10orf125,C10orf96,C11orf2,C11orf53,C11orf91,C12orf44,C16orf59,C16orf71,C16orf74,C17orf46,C19orf22,C1QA,C1QL…
hsa-miR-671-5p	ABCC10,ABP1,ABTB1,ACBD6,ACO2,ACOT8,ACPT,ACTR5,ADAM15,ADAM19,ADAMTS4,ADAMTSL5,ADAT3,ADCK2,ADCK4,ADPRHL2,AGPAT2,ALG12,ALKBH6,AMN,ANGPT4,ANK1,ANKHD1,ANKRD33,AQP6,ARHGAP40,ARHGEF16,ARSI,ASB16,ASF1B,ASIP,ASL,ATP6V1B1,ATP6V1E1,ATPAF2,ATRIP,B3GNT1,B3GNT8,B4GALNT1,BAG1,BCAN,BCAP31,BCDIN3D,BCL2L12,BEST3,BEST4,BRF1,C10orf67,C11orf20,C11orf95,C12orf44,C13orf33,C14orf149,C14orf159,C14orf180,C15orf44,C17orf46…
hsa-miR-672	ABI3,ACOX3,ACPP,ACSF3,ACSM3,ACTG1,ACTN1,ACY3,ADAM29,ADAMTS16,ADAMTS6,ADCK2,AFG3L2,AHNAK2,AK8,AKR1C4,ALPK2,ANK1,ANKFN1,APOB,ATP13A3,ATP5J2,BEST3,BMP1,BPIFA2,BRAP,C10orf53,C12orf44,C13orf15,C14orf49,C16orf42,C17orf50,C19orf53,C1S,C1orf38,C1orf56,C1orf85,C20orf103,C20orf132,C21orf2,C22orf23,C6orf201,C7orf25,C8G,C9,CA4,CABP2,CACNB2,CARD9,CARHSP1,CCDC148,CCK,CCL21,CCRL1,CCT8L2,CD19,CD248,CDCA2,CDCA4,C…
hsa-miR-674	AARS,ABCC2,ABCD1,ABHD1,ABI1,ACP2,ACPP,ACVR2B,ACY3,ADAMTS13,ADCK4,ADRB3,AGBL5,AIRE,AKIP1,ALDH18A1,ANGPTL6,ANKIB1,ANKRD54,AP4B1,ARG1,ARL9,ATP13A2,ATP13A3,ATP5G1,ATP6V0B,ATP9B,BCCIP,BCL10,BFAR,BNIPL,BPHL,BSPRY,C10orf125,C11orf46,C16orf70,C16orf78,C17orf58,C17orf75,C18orf56,C19orf51,C1QL2,C1orf127,C1orf227,C3orf39,C4orf36,C5orf32,C6orf145,C6orf146,C6orf15,C6orf81,C8B,C9orf85,CACNA1G,CCBL2,CCDC86,CCL7…
hsa-miR-675	AARS,AARS2,ABHD12,ACAD9,ACBD4,ACCN3,ACE,ACOX3,ADAP2,ADAT3,AGAP2,AHDC1,AMN,ANAPC2,ANKS1B,ANO7,AQP8,ASB10,ASB9,ASPDH,ATP1A3,ATP2C2,ATP6V0B,AZGP1,AZU1,B3GNTL1,BARHL1,BCL7B,BCL9L,BHLHE23,BPIFA2,BRSK2,BTBD11,C11orf2,C11orf95,C14orf166B,C14orf43,C16orf53,C19orf33,C1QL4,C21orf56,C5AR1,CA6,CABP1,CACNA1B,CADM4,CALN1,CASKIN1,CCDC106,CCDC130,CCDC37,CCL17,CD300C,CD300LD,CENPV,CFD,CHMP4B,CHRNB4,CHST8,CIB2,COG…
hsa-miR-7-1_star	ADAMTS6,ADRB2,ALS2CR8,ANKRD13C,APC,AQR,ARMCX1,ART3,ASB9,ASZ1,ATAD2B,ATF7IP,BICC1,BSND,C12orf45,C14orf149,C1QTNF8,C20orf85,C6orf130,CALCA,CALCB,CAMK2B,CAST,CD99,CEP76,CHI3L2,CLLU1OS,COPA,CSPG5,CTGF,CTRC,DDB2,DEDD,DHRS7B,DKK3,DOK5,EEF1E1,EIF1AX,ENTPD1,FAM179B,FAM96A,FBXO7,FGFR1OP2,FPGT-TNNI3K,FRZB,FUCA2,GAB1,GDF15,GIMAP7,GMFB,GPR125,GPR149,GSTA1,HDAC9,HHLA3,HIGD2A,HOXA1,HOXD9,HSPA2,HSPA4L,IDH1,IL15…
hsa-miR-7-2_star	ADAMTS6,ADH7,ADRB2,ALKBH3,ALS2CR8,ANKRD13C,APC,AQR,ARMCX1,ART3,ASB9,ASZ1,ATF7IP,ATP9A,B2M,BSND,BTNL2,C12orf45,C1QTNF8,C20orf85,C6orf130,CALCA,CALCB,CAMK2B,CAST,CD99,CEP76,CHI3L2,CLLU1OS,COQ7,CSPG5,DDB2,DEDD,DHRS7B,DKK3,DOK5,DUT,EEF1E1,EIF1AX,EXOSC8,FAM179B,FAM96A,FASTKD2,FBXO7,FGFR1OP2,FOXP2,FRZB,GAB1,GIMAP7,GMFB,GPR125,GSTA1,GSTA5,HDAC9,HHLA3,HNRNPH3,HOXA1,HOXD9,HSPA2,HSPA4L,IL15,IL5,IVNS1ABP,KH…
hsa-miR-7	AADAC,ABI2,ACADL,ACBD6,ACRV1,ACTC1,ACY3,ADD1,AGMO,AIMP2,AKAP10,ALDOC,ALS2,AMBRA1,AMIGO2,AOAH,AP3B2,APOA2,APOBEC2,APOL5,ARID4A,ARRDC2,ASB1,ASS1,ASXL1,ATG4A,ATG4C,ATOH1,ATP4B,ATP5C1,ATP6V0B,ATP8B3,AUP1,B3GALNT2,BACE2,BAD,BCAR1,BCAS2,BCL2L12,BEND5,BIN1,BIRC7,BNC2,BOC,BPIFA1,BRMS1,C10orf112,C10orf27,C11orf20,C14orf1,C14orf38,C17orf61,C18orf19,C19orf10,C1orf123,C1orf177,C1orf189,C1orf43,C1orf50,C20orf…
hsa-miR-708	AANAT,ACSF2,AEBP1,AIG1,ALDH1L1,ALOXE3,ALPK1,AMBP,ANKHD1,ANO9,ANXA9,APOA1BP,APOA5,APOC3,ARAF,ASPA,ASPG,ASXL1,ATP5D,ATPAF1,ATXN7L2,B4GALT2,BAMBI,BPI,BPY2,BTK,C10orf62,C10orf71,C12orf44,C16orf52,C16orf78,C17orf75,C18orf21,C19orf46,C1orf35,C20orf29,C2orf76,C6orf154,C6orf164,C7orf50,C7orf53,C9orf129,C9orf169,C9orf3,C9orf91,CCDC12,CCDC22,CCRL2,CD180,CD320,CD34,CDHR4,CEL,CFDP1,CHDH,CKAP5,CLCNKB,CLEC4A,C…
hsa-miR-708_star	ACRV1,ADAL,ADAMTS3,APOL4,AQR,ATP2A2,BHLHB9,BPGM,C21orf59,CA1,CASP3,CATSPERB,CBLL1,CCDC42,CCT3,CD164L2,CDCA5,CDCA7,CDKN2AIP,CGA,CHD1L,CHMP2B,CIR1,CKAP5,CLGN,COL9A1,COX11,CRMP1,CTGF,CWC27,DEM1,DHDDS,DIP2A,DNM1L,DTNB,EIF2B3,ENSA,EPB41L3,F13B,FAM118B,FAM164A,FAM168B,FAM96A,FANCB,FANCL,FAS,FBXO15,FLT4,FOXF2,FRG1B,FUS,GGNBP2,GIPR,GORAB,GOT1L1,GP1BA,HCN4,HDAC1,HIF3A,HIGD1A,HORMAD1,HS2ST1,HTR2B,INCENP,IN…
hsa-miR-744	AATK,ABCA2,ABCC6,ABCD1,ACAA2,ACADVL,ACAP3,ACO2,ACP5,ADCK5,AIP,AMDHD2,AMN,ANKRD13D,ANKRD24,AP3D1,APOB,APOD,ARF5,ARFRP1,ARHGEF1,ARHGEF10,ARRB2,ATG7,ATP1A4,ATP5D,AVP,AZU1,BAD,BCAP31,BCAT2,BID,BIN1,BIN3,BRSK1,BRSK2,BSX,C10orf125,C16orf74,C17orf81,C19orf20,C19orf55,C1QTNF4,C1orf86,C21orf56,C2orf57,C2orf85,C8orf82,C9orf37,CABP1,CACNA1D,CACNG7,CALML5,CALY,CAMK2N2,CARM1,CCDC106,CCDC167,CCDC61,CCL26,CCM2,…
hsa-miR-744_star	ABTB1,ADAM21,ANG,AP4S1,APOA1BP,AQP7,ARHGEF9,ARIH2,B3GNT4,BOC,C11orf88,C17orf72,C17orf81,C19orf2,C19orf28,C1QTNF9B,CABP2,CCDC85B,CD52,CDH24,CERS5,CNPY2,COG4,COPS2,CPA6,CYP17A1,DGAT2L6,DHH,DOCK8,DYM,DYNC2LI1,EIF5A,EML3,ERAS,FAM108A1,FAM108A3P,FAM162B,FAM20A,FAM27A,FAM27B,FAM27C,FAM63A,FAM83E,FBXO34,FBXW5,GBA2,GUCA1A,HAUS7,HOXC11,HPS1,INSM2,IQCF1,MKL1,MMP14,MUC20,MYBL2,NAALADL1,NEU4,NFE2,NFRKB,NME2,…
hsa-miR-757	ACAD10,ACER3,ACOT12,ACP5,ACTA2,ACTRT2,ADAM30,ADAMTSL1,ADAT1,AFAP1,AIRE,ALDH6A1,ANKHD1,ANKRD11,ANKRD43,ANXA7,AP4M1,APCS,APEH,APH1A,ARHGAP4,ARHGEF38,ARRB2,ASS1,ATG2B,ATP13A3,ATP1A3,ATP2A3,ATP5A1,ATP5D,AURKC,BAG1,BAG3,BAMBI,BATF3,BCAR1,BPIFA3,BPIFB3,BSCL2,BTBD2,BYSL,C12orf53,C12orf60,C18orf34,C1orf167,C1orf35,C1orf94,C20orf112,C20orf85,C21orf58,C2orf65,C5orf32,C6orf141,C6orf154,C9orf23,C9orf25,C9orf…
hsa-miR-758	ABCC3,ACAP3,ACOT12,ACSM3,ADAM32,ADAMTSL5,ADPRHL2,AFG3L2,AGPAT2,AHCY,AJAP1,ALG5,AMOTL1,ANGPTL4,ANO2,AOAH,APBB2,ARMC2,ART3,ATAD5,ATP4B,BACH2,BAIAP2,BEST1,BID,BYSL,C10orf57,C12orf10,C12orf5,C12orf66,C13orf27,C14orf166B,C1QL4,C1orf31,C1orf94,C20orf54,C22orf28,C2CD2,C3orf14,C4orf7,C8orf48,C9orf117,CALCA,CAMSAP1,CCDC141,CCL1,CCL17,CCL5,CCNYL1,CD53,CD96,CDC14A,CDC40,CDH26,CELA2A,CEP128,CLN3,CLPTM1L,CMA1…
hsa-miR-760	ABCA2,ABCC8,ABCF2,ABCG5,ABL1,ACAP3,ACIN1,ADAM29,ADAM33,ADAMTS10,ADAMTSL1,ADAMTSL2,AGER,AHDC1,AKAP3,ALMS1,ALPL,AMDHD2,ANKRD54,ANO9,ANPEP,APBA3,APLNR,APOA1BP,ARHGAP10,ATF7,ATG4D,ATG7,ATN1,ATP5D,ATXN7L2,AURKA,AXIN2,B3GALT5,B3GAT3,B4GALNT4,BAI1,BAI2,BAIAP2L2,BATF3,BGN,BPIFB4,BRCA1,BRSK2,C10orf116,C10orf137,C11orf95,C14orf49,C14orf80,C19orf80,C1QL1,C1orf38,C20orf96,C3orf25,C7orf72,C8G,C9orf3,C9orf86,C…
hsa-miR-765	ABCC10,ABHD16B,ACER1,ACP5,ACRV1,ACTA2,ADA,ADAMTSL5,ADCK1,ADCK4,ADH5,AFTPH,AIF1,AMOT,APOA1BP,ARHGAP39,ARHGDIB,ARMC6,ASB16,ASTN1,ATG7,ATP1A3,ATP2A1,ATP6V0D1,ATP6V1F,BATF3,BGLAP,BPIFB2,C10orf10,C11orf87,C16orf46,C19orf77,C1QBP,C1QC,C1orf222,C1orf50,C1orf94,C20orf96,C5orf48,C6orf136,C7orf50,CABP2,CABP4,CACNG7,CALR,CARTPT,CCDC24,CCDC92,CCL19,CCNDBP1,CD164L2,CD22,CD4,CD72,CDA,CDH24,CDK4,CDK5RAP3,CDX1,C…
hsa-miR-766	A1BG,ABCC6,ABHD11,ACAA1,ACCN4,ADAD2,ADAM15,ADAMTS13,ADCK3,ADCK4,ADCK5,ADPRHL2,AEBP1,AFMID,ALKBH5,ANAPC11,ANKRD13D,ANKRD23,AQP5,ARAP1,ARHGAP22,ARHGAP4,ASNA1,ASPG,ASPHD2,ATF7IP,ATG16L2,ATP1A4,ATP5G1,ATP6V0B,B3GAT3,B3GNT7,B4GALNT1,BATF2,BCAR1,BZRAP1,C16orf53,C19orf33,C19orf45,C19orf51,C1orf135,C1orf85,C20orf151,C20orf46,C3orf20,C9orf169,CABP2,CACNG7,CAMSAP3,CARNS1,CASKIN2,CBY1,CCDC22,CCDC85B,CCL20,C…
hsa-miR-767-3p	ABCF2,ACADS,ACBD4,ACSS2,ACTL8,ACTRT1,ACVRL1,ADA,ADCY10,AGPAT2,AGT,AIM1L,AKAP4,AKNAD1,AMT,ANGPTL4,ANKRD13D,ANKRD24,ANKS1A,ANKS3,ANO10,ANPEP,ANXA13,AP2A1,APEH,APOBEC3B,ARHGAP25,ARID5A,ARMC5,ASB2,ASPHD2,BAD,BAIAP2L2,BARX2,BBX,BCAS4,BCO2,BEND5,BMPER,BMPR1B,BOD1,BST2,BTK,C10orf35,C10orf93,C12orf52,C12orf62,C14orf102,C14orf159,C15orf27,C15orf40,C15orf59,C17orf56,C17orf61,C19orf48,C19orf71,C1orf170,C1or…
hsa-miR-767-5p	ACOXL,ACP5,ACVRL1,ADCY10,ADCY5,AHI1,AIG1,AIMP2,AMBRA1,ANGPTL4,ANKRD16,ANKRD24,ANO2,ANXA5,ARHGEF16,ARID5A,ARMC7,ARPP21,ARSI,ARVCF,ASB16,ASB2,ASB8,ATP8B2,ATP8B5P,AVPR1B,AXDND1,B3GNTL1,BCO2,BEND5,BIRC2,BLMH,BPI,BPIFA2,BPNT1,BRE,BST2,BTBD8,C10orf93,C11orf31,C11orf63,C12orf45,C15orf27,C15orf38,C15orf40,C19orf12,C19orf6,C19orf80,C1orf110,C1orf123,C1orf131,C1orf74,C22orf40,C5orf63,C9orf68,CACNA2D3,CAMK2…
hsa-miR-768-3p	AADAC,ABCA4,ABCC4,ACAT1,ACSS3,ACTR10,ADCK2,ADORA3,AHR,AICDA,AKAP9,ALG8,AMHR2,AMOT,ANKRD30BP1,ANP32E,ANXA5,APIP,APOB,ASGR1,ATOH7,ATP2B4,ATP5A1,AWAT2,B3GNT3,BBX,BCL2A1,BEST3,BEX1,BIN3,C10orf136,C12orf48,C12orf65,C12orf70,C13orf27,C14orf109,C16orf57,C17orf63,C19orf59,C1D,C1QTNF9,C1QTNF9B,C1orf129,C1orf86,C2CD3,C5orf22,C6orf163,C8orf45,C9orf103,C9orf40,C9orf84,CADPS2,CALCB,CASC3,CASP9,CAV1,CCBL2,CCDC…
hsa-miR-768-5p	ABCC12,ABHD16A,ABHD16B,ABLIM2,ABR,ACER2,ADA,ADCK2,ADH5,ADIPOR1,ADORA3,AICDA,ALDH18A1,AMOT,ANP32E,ANXA1,APBA3,APEX1,APH1A,APLF,APOA2,APOB,AQP6,ARHGEF4,ARMC3,ASB12,ASNA1,ATP2B1,ATP2B4,ATP6V0D2,BACE2,BCAP29,BEST2,BEX1,BMPR1A,BST2,C10orf136,C11orf85,C11orf87,C12orf41,C14orf101,C14orf49,C16orf61,C19orf51,C19orf71,C1QBP,C1QTNF9,C1QTNF9B,C1orf129,C1orf74,C8orf84,C9orf84,CABP2,CADPS2,CALR,CAMLG,CAP2,CCDC…
hsa-miR-769-3p	AAAS,ABCA4,ABCD1,ABI2,ACIN1,ACSF3,ACSL5,ADA,ADAT3,ADD1,AES,AFMID,AGBL4,AGER,AGTRAP,AHDC1,AHI1,ALKBH6,ALPL,ANPEP,AP3D1,APCDD1L,APOB,AQP5,ARAF,ARHGEF11,ARMC6,ARPC2,ARTN,ASB2,ASGR2,ASIP,ASPG,ATP5D,ATP6AP1L,AZGP1,BABAM1,BAP1,BARX1,BCAN,BCAR1,BCL3,BCOR,BHLHA15,BPIFB1,BRE,BST2,BTD,BTNL9,BYSL,C10orf35,C11orf24,C11orf86,C14orf38,C14orf48,C14orf80,C15orf55,C16orf71,C16orf74,C16orf89,C17orf39,C19orf53,C2,C…
hsa-miR-769-5p	ABCA4,ACPP,ACSF3,ACTL7B,ACY3,ADAMTS15,ADAMTS17,ADAP2,ADCY9,ADRA1A,AGBL4,AGPAT1,AGTRAP,AHDC1,AKR7A2,ALDOC,ALKBH6,ANKRD24,ANKZF1,APITD1,APOB,AQP5,ARFGAP2,ARHGAP10,ARHGEF16,ARHGEF38,ARL6IP4,ARL9,ASB10,ASB2,ATG7,ATP5B,BCAN,BCAT2,BCL2L11,BEST2,BEST4,BIN3,BNC1,C10orf91,C16orf48,C16orf71,C17orf56,C19orf28,C1QTNF1,C1orf111,C1orf35,C1orf38,C2,C20orf112,C20orf151,C22orf28,C2orf28,C3orf18,CADM4,CAPN10,CAPNS…
hsa-miR-770-5p	ABCC10,ACAD9,ACBD4,ACBD6,ACER1,ADAMTS14,ADAMTS8,ADNP,AGPAT3,AGTR1,AIFM3,ALPK1,AMIGO2,ANKZF1,ANO8,ANXA6,AP2A2,AP3S1,ARF5,ARPC2,ATG4D,ATP5G1,ATPAF1-AS1,B3GAT3,B3GNT1,B4GALT3,BAI1,BAZ1A,BCAN,BEST4,BIK,C10orf35,C10orf81,C11orf42,C14orf133,C14orf2,C15orf43,C16orf61,C1QC,C20orf196,C20orf46,C21orf2,C2orf43,C3orf20,C6orf48,C6orf62,C9orf86,CALCA,CARM1,CBR3,CBY1,CCDC167,CCDC22,CCNO,CCT7,CD101,CDC25A,CDC34,…
hsa-miR-801	ABHD5,ACTR5,ADH4,AIM2,AKAP4,ALDH6A1,AMACR,ANXA7,ARPC5,ASCL3,B9D2,BAIAP3,BCAP31,BFSP2,BLVRB,BMPR1B,BUB1B,BUD31,C10orf128,C10orf71,C10orf82,C10orf90,C11orf63,C19orf80,C1orf228,C1orf49,C20orf196,C9orf150,C9orf24,C9orf84,CA3,CAMP,CAPZA3,CASC5,CCDC34,CCDC89,CCDC96,CCL18,CCL23,CCL24,CCRN4L,CD19,CDCA8,CDH4,CDK4,CDX2,CEP128,CFD,CHAF1B,CHD4,CHRNB4,CITED4,CLCA1,CLEC2A,COIL,CRNN,CSNK1G1,CXCL6,CYB5D2,CYP1A1,…
hsa-miR-802	AARS,ABHD16A,ACSS3,ACTA1,ADAT2,ADSL,AGRN,ALKBH1,ALX1,ANKRD13C,ANUBL1,ANXA5,AP4B1,APOD,ARFGAP2,ARL6IP6,ART3,ASPDH,ASPHD2,ATG4C,ATP5E,ATP6V1B2,AVL9,AWAT2,BCAP29,BMS1,BPHL,BRIX1,C12orf24,C12orf40,C16orf52,C16orf62,C16orf95,C17orf39,C18orf32,C18orf55,C19orf45,C1GALT1,C20orf196,C4orf29,C5orf44,C9orf82,C9orf95,CAMK2N1,CARTPT,CASC3,CBX8,CCBL2,CCDC116,CCDC147,CCDC158,CCDC18,CCDC96,CCL20,CCNA1,CCT6A,CCT8,…
hsa-miR-871	ACAD8,ACP6,ACSS2,ACYP1,AKR7A2,ALS2CR12,ANKRD36B,ARFIP2,ARMC4,ARMCX2,ARPC1A,ASB11,ASCC3,ASPHD2,ASTE1,ATL2,ATP5C1,B3GALNT2,BCL2L10,BEND5,BFSP2,BIRC7,C14orf109,C14orf2,C16orf61,C18orf21,C19orf2,C1orf27,C1orf31,C1orf68,C2,C20orf134,C20orf24,C2orf28,C2orf78,C9orf85,CADPS2,CALM2,CCDC12,CCDC132,CCDC23,CCDC64,CCKAR,CCNA2,CCNI2,CCR8,CD163,CD19,CD84,CDH15,CDH16,CDKN2C,CEACAM21,CEACAM3,CEACAM4,CECR2,CEP192,…
hsa-miR-872	ACAA2,ACOT13,ADAM7,ADAMTS8,AKIRIN2,AKR7A2,AKTIP,AQP7,ARHGEF9,ASB1,ASH2L,ATG7,ATPAF2,AURKA,B3GAT3,BAI3,BAX,BEST4,BOC,C14orf49,C16orf61,C18orf34,C3orf33,C4orf43,C5orf34,C6orf72,C8orf37,CAPRIN2,CAST,CCDC38,CCDC75,CCDC80,CCL16,CCR8,CD101,CD9,CDH19,CDKL4,CHCHD1,CHD4,CLDN17,CLVS2,CNTF,CSDA,CTSZ,CXorf57,CYB5A,DAD1,DARS,DDA1,DDIT3,DDX25,DMRT1,DNAH3,DUSP13,EAPP,EGF,ELOVL3,ENPEP,ERMP1,ETAA1,FAIM,FAIM3,FAM1…
hsa-miR-873	A2M,AAAS,ACAN,ACO2,ADHFE1,AKIRIN1,ALDH16A1,ALDH9A1,ALKBH6,AMIGO3,ANGPTL4,ANKHD1,ANP32B,AOAH,APPL2,AQP8,ARF6,ARID1B,ASCL3,ATL3,ATP6V0C,BBS2,BIN1,BNIP1,BPGM,BPI,BRP44,BTBD11,BUD31,C10orf27,C15orf26,C17orf58,C17orf82,C1QC,C1orf172,C20orf26,C2orf40,C7orf36,C7orf43,C8orf47,CA14,CAMK2D,CAMK2N2,CAPN1,CAPN8,CATSPER4,CCDC102A,CCDC135,CCDC60,CCDC85C,CDK5RAP3,CHD9,CLDN6,CLEC17A,CLK3,COG8,COL9A2,COLEC11,COMM…
hsa-miR-874	ABCB9,ACAP3,ACP5,ADAMTS15,ADAMTSL1,ADCK5,AEN,AHCYL1,AJAP1,AKAP17A,ALPK1,ANKZF1,ANXA13,AP1B1,APBA2,ARHGEF25,ARID3B,ARIH2,ARMC6,ASB2,ATF3,ATG4D,ATOH8,ATP2B3,B3GAT3,B3GNT7,BAI1,BDH1,BEAN1,BIK,BIRC7,BRD4,BTBD2,BYSL,C10orf125,C10orf28,C12orf34,C16orf71,C16orf89,C17orf70,C17orf74,C19orf59,C21orf2,C2CD4C,C2orf62,C4A,C7orf43,C9orf169,CABLES2,CABP1,CAPN12,CAPNS1,CBLC,CBLN3,CCDC13,CCDC134,CCDC157,CCDC85B,C…
hsa-miR-875-3p	A1CF,AAMP,AANAT,ACTA2,ACTL6B,ACTL8,ADAMTSL1,ADPRH,AGBL4,AKAP10,ALOX5AP,ANGPTL2,ANGPTL5,ANKDD1A,ANKRD54,ARL14,ARPC1B,ARPC3,ASB4,ASB9,ATF3,ATP7B,AVL9,AZI1,BACE2,BATF,BIK,BRCA2,BRD8,BTBD16,BTN2A1,BVES,C10orf82,C11orf63,C12orf51,C12orf62,C14orf1,C15orf26,C16orf87,C18orf56,C19orf56,C1QTNF9,C1orf129,C1orf50,C1orf63,C3orf33,C3orf77,C4orf41,C5orf46,C6orf15,C7orf11,C7orf44,C9orf29,CALHM3,CALR,CAST,CATSPER…
hsa-miR-875-5p	ABI1,ACP6,ACTL8,ADAMTS1,ADAMTSL1,ADCK5,AHI1,ALS2CR12,ANKMY2,ANKRD16,ANKZF1,AQP11,ARL4C,ARPC1B,ASB2,ASB4,ASGR2,ASL,ASPRV1,ASTE1,ATF3,ATG12,ATP6AP1L,ATP6V0A4,BAAT,BCAS1,BLMH,BLNK,BLZF1,BMS1,BRCA2,BRD8,BUD13,C11orf10,C11orf53,C12orf41,C12orf62,C17orf63,C19orf51,C1QTNF9,C1orf129,C1orf177,C1orf192,C1orf56,C22orf25,C22orf28,C2orf43,C2orf56,C3orf39,CA3,CACNG1,CALHM2,CAPS2,CASC1,CCBL1,CCDC129,CCDC134,CCD…
hsa-miR-876-3p	ABCC10,ABCC8,ACAA2,ACBD7,ACE,ACTN4,ADAMTS4,ADRA1A,AFF4,AHSG,AKD1,ANKHD1,ANKIB1,ANKMY1,ANKRD33,ANKRD36B,ANKRD55,ANKRD58,ANKRD7,ANKS4B,ARL14,ASB12,ASZ1,ATP13A2,ATP1A1,ATP6AP1L,ATP6V0C,ATP8B3,ATP9A,BAI2,BCAS3,BCKDHB,BCL2L14,BLZF1,BMPR1A,BNIPL,BOLA1,BRDT,BRP44L,BTBD8,BTG3,C10orf125,C10orf62,C10orf99,C11orf35,C11orf63,C11orf88,C12orf24,C16orf89,C1QC,C1orf74,C1orf94,C20orf165,C20orf24,C20orf46,C2orf15,…
hsa-miR-876-5p	AAGAB,ACAA2,ACAT1,ACTL6B,ACTR3B,ACVR1,ADA,ADAMTS6,AGBL1,AGR3,AIG1,AKR1E2,ALPK2,AMDHD1,ANKIB1,ANKRD37,ANKRD55,APEX1,APLP1,APOB,ARHGAP6,ARID3A,ARID3B,ARMC3,ATF2,ATP10A,ATP12A,ATP9A,B3GALT2,BABAM1,BCL2L10,BCL2L14,BST2,BTG3,BTG4,BTK,C10orf112,C10orf116,C10orf99,C11orf88,C14orf149,C16orf57,C16orf74,C1orf192,C1orf31,C1orf38,C1orf63,C1orf74,C2,C20orf132,C2orf51,C2orf70,C2orf83,C6orf204,C7orf53,C8orf34,C…
hsa-miR-877	AANAT,ABHD5,ACRBP,ACRV1,AIRE,ALDH3A1,ALS2CR12,AMOT,ANO7,APOBEC3C,ARL6IP4,ASF1A,ASPSCR1,B3GNT4,BATF3,BICC1,BMS1,BPIFA1,BTD,BTN1A1,C10orf35,C11orf34,C1orf68,C2,C20orf54,C2orf82,C5orf32,C5orf48,C6orf57,CAMLG,CAP1,CASQ1,CBX8,CCL19,CCL26,CCM2,CD33,CDC37,CDCA3,CDIPT,CDK5RAP3,CENPF,CLDN4,CNTROB,COX6B1,CRYM,CSPG5,CTSF,DDX49,DEDD,DGAT1,DHPS,DIP2A,DLG1,DLGAP1,DNA2,DNAH9,DOK5,DR1,DTYMK,DYNLT1,EBI3,EDDM3B,EF…
hsa-miR-877_star	AAMP,ABI3,ACAN,AMOTL1,APLNR,ARHGEF1,ARRB2,BAI2,BAIAP2,BCAR1,BNIP1,BRSK1,C19orf53,C20orf26,CACNA1C,CACNA1E,CD72,CDH15,CECR2,CERS5,CNIH4,COL27A1,CPXM1,CRHR2,CRIPAK,DNAJB13,ECHDC1,EDF1,EEFSEC,EME2,EMP2,ETHE1,FADS1,FAM167B,FAM176B,FKBP2,FLAD1,FLII,GPATCH3,GPR108,GRRP1,GSS,HRG,HSD17B1,IGFBP2,IGFN1,IL34,ITGA7,ITIH1,JUNB,KCNE3,KIF1C,KREMEN2,KRT13,LIM2,LPIN3,LRRC25,MESP1,MLL2,MPI,MTA1,MYBPH,MYL9,NOSIP,NO…
hsa-miR-885-3p	ABCB9,ABCC12,ACAP3,ACCN2,ACER1,ACSL5,ACTR3B,ADAM11,ADAM15,ADAMTSL1,AGPAT2,AGRN,AGTPBP1,AKT2,ALPK2,ALPL,AMN,ANKRD13D,ANKRD44,ANXA5,AP2M1,AP2S1,AP3B1,APOBEC2,AQP3,AQP8,ARAF,ARID1A,ARMCX3,ART1,ASNA1,ASPG,ATG2A,ATG7,ATP13A1,ATP13A2,ATP1A3,ATP5C1,ATP6V1B1,BEST2,BIN3,BMP1,BMP10,BNIP1,BOD1,BPIFB2,BRF1,BRP44L,C10orf96,C11orf2,C13orf15,C14orf1,C15orf55,C16orf95,C17orf53,C19orf22,C19orf45,C19orf56,C1QL1,C1…
hsa-miR-885-5p	ABCA1,ABHD12B,ABHD16B,ABLIM2,ACER1,ACOXL,ACSL6,ACVRL1,ADAM2,ADAMTS6,ADAMTSL4,ADCK5,ADD1,AEBP1,AGBL1,AHNAK,AHSG,AKR1E2,ANKRD13D,ANKRD24,ANXA13,AP2M1,AP2S1,APBB1IP,APOOL,ARHGEF1,ARPC1B,ARPP21,ART5,ASGR1,ASNS,ASPG,ASS1,ATF7,ATPAF1-AS1,B3GNT8,B4GALNT2,BDKRB1,BFAR,BMP3,BNIP1,BUD13,C11orf41,C14orf48,C15orf40,C15orf58,C17orf58,C17orf81,C19orf28,C1orf74,C1orf87,C20orf196,C6orf154,C7orf63,C9orf169,CABYR,C…
hsa-miR-886-3p	AACS,ABCA3,ABR,ACER1,ADAMTS13,ADAMTS17,ADCY4,ADPRHL1,AEBP1,AGER,AHNAK2,ALAS2,ALG12,AMN,ANAPC2,ANKRD24,ANKRD33,AQP7,ARFGAP2,ARHGAP10,ARHGAP4,ARID3A,ARL2,ASB16,ATAT1,ATP13A1,ATP2A1,ATP2A3,ATP6V0B,AVP,AZI1,BABAM1,BAI1,BAI3,BAIAP2L2,BARX1,BATF3,BCAT2,BPIFB1,C10orf93,C11orf96,C15orf38,C16orf53,C16orf79,C16orf95,C17orf101,C17orf82,C19orf20,C19orf35,C19orf70,C1QL1,C1QL4,C1QTNF1,C1QTNF4,C1RL,C1orf70,C20o…
hsa-miR-886-5p	ABCA2,ABHD16B,ACIN1,ACO2,ADARB2,AGER,AHSP,AKAP3,AKT1S1,AMIGO2,AMN,ANKRD33,ANKS1B,AP2A1,AQP10,AQP7,ARHGAP33,ARHGAP40,ARHGDIA,ARL2,ARL6IP4,ASTE1,ATAT1,ATG7,AWAT1,AZGP1,B3GAT3,B3GNT8,B9D2,BAD,BAI1,BAIAP3,BARHL1,BARHL2,BAX,BCAT2,BCL3,BHLHE23,BNIP1,BPI,BRD4,BRD8,BRSK2,C11orf80,C11orf86,C15orf55,C16orf74,C16orf79,C17orf101,C17orf82,C19orf26,C19orf48,C19orf6,C19orf70,C19orf71,C1QL1,C1orf170,C1orf172,C21…
hsa-miR-887	AAMP,ABCC10,ACPP,ADAM9,ADCK2,ADCY9,ADRB3,AKR1B1,ANKRD56,AOC2,APOBEC3B,ARAP1,ARGLU1,ARHGAP4,ARR3,ARRDC2,ASPHD1,ATG7,ATP13A2,ATP13A3,B4GALNT3,BAD,BEND3,BEND7,BTBD2,BTD,C11orf53,C14orf166B,C15orf44,C16orf87,C19orf21,C19orf80,C1QTNF9,C1QTNF9B,C1orf123,C20orf26,C7orf43,C9orf156,C9orf169,C9orf41,C9orf78,C9orf84,CA6,CACNA1H,CALHM3,CALN1,CCDC102A,CCDC56,CD3E,CD99,CDCA2,CDH22,CDKN1C,CEP350,CFDP1,CHD3,CHST…
hsa-miR-888	ACD,ACSS3,ACTG1,ACYP1,ADC,ADRB2,ANP32B,AOAH,AP4B1,AQP11,ARHGAP21,ARHGAP25,ARHGAP9,ARID3C,ARPC3,ATAD5,AVIL,AWAT1,BAMBI,BCL6B,BIRC3,BNIPL,BSND,BTK,C10orf112,C10orf76,C11orf31,C14orf102,C17orf57,C19orf2,C2orf54,C3orf25,C6orf103,C6orf94,C7orf44,C8orf48,C8orf80,CALCA,CALCB,CALHM3,CAMSAP1,CCDC122,CCDC129,CCDC23,CCDC36,CCL13,CD58,CDC37,CDCA2,CENPK,CENPW,CEP70,CEP72,CFH,CHEK2,CHST2,CHUK,CLDN12,CLDN8,CLEC…
hsa-miR-888_star	AGAP4,AGAP6,APOBEC3H,ARF3,ATP1A3,BTD,C10orf137,C11orf2,C1orf43,C1orf56,C4A,CCDC65,CCDC90B,CCM2,CDK13,CLK4,CRIPAK,CTGLF11P,CXorf24,CXorf26,CYP2D6,DEFB119,DNAH6,DNAJC28,DYNLL2,ECHDC2,EGFL6,ERO1LB,FAM69B,FKBP10,GLRX2,HAUS4,HAX1,HEBP2,HIST1H2BG,HSPBAP1,ILK,ING1,ITPKB,KLF3,LCP2,LIN37,LIPC,LSM6,MAX,MBTD1,MEPE,METTL21A,MRS2,MTX2,NAT2,NOL11,NUP133,OR13A1,OTUD7A,PAIP2,PHRF1,RAB39,RCC1,RPRD2,RSPH1,RUVBL1,S…
hsa-miR-889	A2M,AAMP,AASDH,ABCD3,ABLIM3,ACTN1,ALS2CR11,AMBN,ANKUB1,APBB1IP,ARAP2,ARL6IP4,ARMC2,ARSK,ATG4C,ATP13A4,ATP6AP1L,ATP9B,BCAR3,BICD1,BMX,BNIP3,BOLA3,BTNL8,C10orf137,C16orf59,C17orf78,C2orf80,C4orf47,C5orf35,C6orf58,C7orf11,C7orf46,C9orf46,CCBL2,CCDC141,CCDC147,CCDC150,CCK,CCL8,CCNT2,CDH19,CDKN2AIP,CDR1,CETN2,CFHR3,CHAC2,CHPT1,CHRDL2,CITED2,CLCN5,CLPX,COQ3,CRLS1,CTCF,CUX2,CXorf24,DAPL1,DBR1,DEF6,DENND…
hsa-miR-890	ABCA3,ACE,AGT,AKIP1,AKR1E2,ALG12,ALKBH5,ANXA9,AP3M1,APOBEC3B,APOBEC3H,ARMC2,ASB1,ASB7,ASTE1,ATP13A4,ATP5EP2,ATP8B3,AVL9,AXDND1,B3GAT3,BACE2,BCL2L12,BIN3,BOD1L,BVES,C12orf24,C12orf5,C12orf62,C14orf1,C15orf24,C15orf26,C16orf61,C16orf71,C17orf109,C17orf96,C19orf51,C1orf101,C1orf74,C20orf24,C20orf26,C4orf21,C5,C5orf34,C5orf35,C6orf146,C7orf42,C7orf46,C8orf37,C9orf96,CA4,CALM2,CALY,CCDC54,CCDC73,CCDC8…
hsa-miR-891a	ABCA1,ACP2,ACP6,ACTN1,ADAM10,ADM,ADPRHL2,ADRM1,AFG3L2,AHSP,AIG1,AKIRIN2,AKT2,ALAS2,ALDH1L2,ALS2CR12,ALS2CR8,AMIGO2,AMY2B,ANG,ANKRD33B,ANKRD54,AP1M1,APOD,APOOL,ARHGAP12,ARHGAP21,ARHGAP35,ARHGAP40,ARHGDIB,ARHGEF9,ARMCX1,ASRGL1,ATAD5,ATP5J,ATP5SL,ATP6V1H,ATP8A2,ATP9A,B4GALT5,BARX2,BAX,BEND5,BHLHE40,BIN3,BLCAP,BMP10,BPIFB2,BRD4,C15orf40,C15orf55,C17orf75,C18orf19,C18orf55,C1orf177,C1orf50,C20orf85,C2…
hsa-miR-891b	AADAC,ACMSD,ACTA1,ADAMTSL1,AGTR1,AICDA,AIG1,AIMP1,AKTIP,ALG8,ALPK2,ALS2CR12,AMIGO2,ANKIB1,AP3D1,AP3S1,APLP2,APOA1BP,APOBEC3H,APOD,ARL6IP6,ARMCX1,ARMCX5,ARPC2,ART3,ASCL1,ATP5J,ATP5SL,ATP6V1B1,ATP6V1H,ATP8A2,AXDND1,B2M,BAG3,BEND5,BFSP2,BOD1L,BRIP1,BTG1,C14orf102,C14orf109,C15orf40,C15orf42,C16orf74,C17orf75,C19orf57,C19orf69,C1orf141,C20orf85,C22orf28,C2orf89,C3orf38,C5orf56,C7orf11,C8B,C8orf84,C9o…
hsa-miR-892a	ABHD12B,ACAA1,ACAA2,ACP2,ACTA1,ADAM10,ADIG,AGAP3,AGT,AKR1E2,ALAS1,ALDH8A1,ALG14,AMIGO3,AP3S1,APOB,APRT,ARHGEF25,ARMC7,ARNT2,ARRDC2,ART5,ASB4,ASCC2,ATP1A4,ATP2B2,ATP6V0D1,ATPAF2,AVL9,B9D1,BARX1,BBS4,BBS9,BEST3,BLMH,BPIFA1,BST2,C10orf62,C12orf34,C12orf50,C12orf59,C12orf65,C19orf53,C1QB,C1orf123,C1orf159,C1orf177,C1orf43,C1orf63,C20orf43,C20orf85,C2orf80,C2orf89,C3AR1,C5orf46,C7orf23,C8orf33,C8orf47…
hsa-miR-892b	ABCB11,ABCC3,ABHD12B,ABHD2,ACAA2,ACADVL,ACTN4,ADAMTS8,AKAP4,ALDH18A1,ALDH1L1,ALDH6A1,AMBP,ANPEP,AP2A1,APLNR,APOB,ARHGAP22,ARNT2,ASCC2,ATG7,ATOH8,ATP1A4,ATP2B2,ATP5D,ATP6V0A1,ATP8B3,AVEN,B3GNT7,BAI1,BARHL2,BCAR1,BDH1,BID,BMS1,BOD1,BRMS1,C10orf62,C11orf49,C12orf34,C15orf42,C16orf48,C19orf33,C19orf80,C1orf122,C1orf159,C1orf170,C1orf177,C1orf43,C1orf50,C20orf26,C20orf43,C3orf25,C4orf37,C5orf63,C6orf2…
hsa-miR-9	ACAT2,ADAMTSL3,ADAT1,ADH5,ADSSL1,AGMAT,AKR1B1,ALG12,ALG14,ALOX5,AMIGO2,AMN,ANKAR,ANKRD33,ANKRD58,ANKZF1,ANP32B,ANXA5,AOX1,AP2M1,AP3S1,AP4B1,APRT,ARAP3,ARID3A,ARID3B,ARID3C,ARMCX2,ARPC1A,ARSF,ASPHD2,ATP5C1,ATP5F1,ATP6V1D,AUH,B9D1,BARX2,BEND7,BICC1,BLZF1,BOLA3,BRAT1,BYSL,C11orf63,C12orf48,C12orf50,C14orf102,C15orf60,C18orf21,C1GALT1C1,C1orf177,C1orf222,C1orf63,C20orf111,C20orf195,C2orf53,C7orf25,C7…
hsa-miR-920	A3GALT2P,ABHD16B,ACCN2,ACCN4,ACHE,AFG3L2,AGER,AGPAT2,AHDC1,AHNAK2,AK8,AKAP3,AMBN,ANKRD54,ANO10,ANXA6,AP2A2,APOA1BP,AQP10,ARHGAP30,ARHGAP35,ARHGEF25,ARID5A,ARL2,ASPA,ATP5G2,ATP6V0D1,ATP6V1E1,ATPAF2,ATXN2L,BEST2,BTNL9,BYSL,C10orf116,C10orf125,C12orf44,C14orf1,C16orf53,C17orf109,C17orf56,C19orf28,C1QC,C1orf123,C1orf86,C6orf132,C6orf154,C7orf43,C9orf142,CA4,CABP1,CABP5,CACNG1,CACNG7,CALB2,CAMKMT,CCDC…
hsa-miR-921	A4GNT,ACCS,ADAM9,AHNAK2,ALDH4A1,ALG12,ARPC2,ASCC2,ATAT1,ATF2,ATF6,ATP12A,ATP6V0B,B4GALT3,BAD,BBS9,BEST1,BMF,C10orf116,C18orf21,C19orf54,C19orf80,C1orf147,C20orf62,C2orf66,C7orf59,C9orf68,CAPN12,CAPRIN2,CASP8AP2,CASZ1,CBLN1,CCDC102B,CCDC132,CCDC147,CCDC154,CCDC73,CCL5,CD101,CD2,CDK15,CEP290,CHTF8,CHTOP,CIITA,CLYBL,CNTF,COG1,CRTAC1,CSK,CSNK1E,CTC1,CXCR7,DAD1,DAO,DCST1,DEFB118,DENND1C,DERL2,DNAH12,D…
hsa-miR-922	AARS,ABCA6,ABHD16B,ACTN1,ADSS,AHCY,AHSA1,AIFM3,ALAS2,ALOX12,ALOX5AP,ANKRD13D,AP1S1,AP2A1,APBB1,APH1A,ARHGAP22,ARHGDIA,ASB11,ASNSD1,ATP2A2,AVL9,BAI3,BAMBI,BNIP3,BPIFA1,BRP44L,C11orf49,C11orf87,C12orf5,C12orf53,C12orf63,C14orf1,C14orf37,C15orf17,C17orf70,C2,C20orf46,C22orf31,C3orf37,C7orf43,CAB39L,CARM1,CASC3,CATSPER1,CBS,CCDC12,CCL4,CD3E,CDC37,CDC42,CDCA2,CDCA5,CEBPZ,CEP72,CFH,CHGA,CHRNA1,CLDN6,CO…
hsa-miR-923	ACCS,ACSL1,ADAD2,ADAM23,ADSS,AEBP1,AGBL5,AKAP1,AKD1,AKR1B10,AKT2,ALDH3A1,ALOX5AP,ANKRD13D,AP2A1,APBB1IP,ASB1,ASH2L,ATP13A1,ATP13A3,ATP6V0D1,BAX,BCAT2,BFAR,BHLHA15,BPIFA1,BSND,C10orf11,C10orf90,C12orf44,C17orf101,C17orf70,C19orf10,C19orf44,C19orf51,C1QA,C20orf26,C20orf29,C2orf76,C6orf154,C7orf43,C9orf150,C9orf156,CALY,CAPN10,CARTPT,CCDC116,CCDC132,CCDC147,CCDC22,CCDC24,CCDC88B,CCL17,CCT3,CDKL3,CGA…
hsa-miR-924	A1CF,ABHD11,ABL2,ACCN3,ACCS,ACO2,ACSM5,ACSS3,ACTN4,ACTR5,ADAM15,AGBL5,AGPHD1,AIG1,ANKAR,ANXA1,APOBEC1,AQP11,ATP6V0E1,ATP6V1D,ATP8B1,ATXN10,AURKAIP1,AXL,BAIAP2L2,BCAM,BIN2,BIVM,BMX,C10orf99,C11orf82,C14orf159,C16orf61,C17orf46,C19orf52,C1orf61,C20orf173,C2orf68,C7orf45,C7orf51,C8orf85,C9orf29,CCDC142,CCDC40,CCDC73,CD163,CDK15,CHD8,CHI3L1,CKMT1B,CLTCL1,CMTM8,CNPY3,COL16A1,COL6A2,CPA6,CRNN,CTSL1,CTS…
hsa-miR-92a-1_star	ABCD1,ABCF3,ABI3,ACE,ACRBP,ACY3,ADRA1A,AGXT,AHRR,AHSA1,AIF1,AKAP4,ALDH3A1,ANKRD2,ANKRD33,AQP5,ARAP1,ARHGAP33,ARL2,ARL6IP4,ASL,ASNA1,ATP13A2,ATP1A3,ATP2A1,ATP5D,ATP6V0A1,AVPR2,AZU1,B4GALNT4,BPIFB4,BSCL2,BTD,C10orf107,C10orf116,C12orf52,C15orf55,C16orf79,C16orf89,C19orf28,C19orf48,C19orf60,C1QL1,C1orf111,C1orf159,C2orf15,C2orf53,C2orf85,C4orf36,C4orf6,C6orf164,C9orf16,C9orf23,CA6,CAMK2G,CASZ1,CCDC6…
hsa-miR-92a-2_star	ABCD1,ABCF3,ABHD16B,ACE,ACO2,ACPT,ADCK4,ADRM1,AKAP4,ALDH3A1,ALPI,ANAPC2,ANKRD33,ANKS1B,APOA4,ARHGDIB,ARHGEF1,ARL2,ASNA1,ATP13A2,ATP2A1,ATP5D,AVPR2,AZU1,BAI2,BANF1,BMP1,BSCL2,C10orf107,C10orf116,C17orf109,C17orf50,C17orf81,C19orf21,C19orf28,C19orf53,C1QC,C2,C20orf27,C2orf15,C2orf53,C2orf54,C4orf36,C4orf6,C7orf26,C8G,C9orf16,C9orf23,CA6,CABP1,CAMK2A,CAPN8,CCDC102A,CCDC7,CCK,CCL19,CD27,CD7,CDHR4,CDK…
hsa-miR-92a	AARS,ACAA1,ACAA2,ACACB,ACADL,ACAT2,ACSS2,ACTC1,ADM,ADSSL1,AGMAT,AICDA,AKR1E2,ANKRD24,ANO8,AOAH,APRT,ARHGEF10,ARHGEF17,ARMC2,ARNTL2,ASH2L,ATP6V0D2,AURKA,AXDND1,AXL,BAZ2B,BCAR1,BCAT2,BOLA1,C10orf111,C10orf58,C10orf90,C16orf53,C16orf80,C19orf12,C19orf46,C19orf52,C19orf54,C1orf174,C1orf87,C2CD3,C3orf25,C3orf33,C6orf27,C6orf94,C7orf25,C7orf63,C9orf85,CA1,CACNB4,CAMLG,CARKD,CASS4,CCL8,CCNC,CCNE2,CCNO,C…
hsa-miR-92b	AARS,AATK,ACAA1,ACAA2,ACACB,ACADL,ACAT2,ACTC1,ADM,ADSSL1,AGMAT,AKR1D1,AKR1E2,ANKRD24,AOAH,ARHGEF17,ARMC2,ARNTL2,ATP6V0D2,ATP6V1B2,AURKA,AXDND1,BAZ2B,BCAR1,BCAT2,BOLA1,BRD3,BST2,C10orf111,C10orf137,C10orf58,C10orf90,C12orf43,C15orf61,C16orf53,C19orf12,C19orf46,C19orf52,C19orf54,C1orf174,C1orf228,C20orf112,C2CD3,C3orf25,C3orf33,C6orf27,C6orf35,C6orf94,C7orf25,C7orf63,C9orf150,C9orf85,CA1,CABP2,CABY…
hsa-miR-92b_star	ABCD1,ABHD16B,ABI3,ACO2,ACSF3,ACSL6,ADRM1,AGXT,AHRR,AHSA1,AKT1S1,ALPI,ANAPC2,ANKS1B,APOA2,APOA4,ARAP1,ARHGDIB,ARHGEF1,ARL2,ATP13A2,ATP1A3,ATP2A1,ATXN2L,AWAT2,B4GALNT4,B9D2,BAI2,BANF1,C11orf84,C16orf79,C17orf81,C19orf53,C19orf60,C1QL1,C1orf111,C1orf159,C2,C2orf54,C2orf85,C8G,CABP1,CAMK1,CAMK2A,CAMK2G,CASZ1,CCDC61,CCDC9,CCL1,CD37,CD72,CDK4,CENPT,CENPV,CHD3,CHST8,CIDEB,CIDEC,CIZ1,CKM,CLPTM1,CLTB,CNF…
hsa-miR-93	AADAC,AADAT,AARS2,ABCD3,ACADVL,ACER1,ACOT9,ACPL2,ADHFE1,ADORA2B,ADRA1B,AGAP10,AGAP9,AGMAT,AGMO,AHI1,AIM2,ALDH16A1,ALPK2,AMBRA1,ANKK1,ANKRD44,ANKRD9,APBB2,APCS,APOBEC4,ARPC3,ASAH1,ASB9,ASCL3,ATAD2,ATP6V1D,B3GALNT2,BAMBI,BEX5,BMX,BPHL,BPIFC,BPNT1,BSPH1,C11orf1,C12orf65,C14orf177,C15orf40,C16orf91,C17orf104,C19orf2,C19orf39,C19orf40,C19orf45,C1orf43,C1orf63,C20orf43,C2orf62,C5orf45,C6orf132,C6orf72,…
hsa-miR-933	ABCD1,ADAMTSL5,ADAT3,ADK,ADRA1B,AHRR,AIFM1,AIM1L,AKAP17A,ANKRD2,ANKRD33B,ANO9,AP3D1,ARF5,ARHGAP4,ARL3,ARVCF,ASPN,ATF3,ATP1A1,ATP2B3,ATP9A,AVPR1B,BAG3,BCL2L14,BTBD2,C14orf70,C19orf80,C1orf86,C20orf85,C22orf25,C22orf28,C6orf118,CAMK2N2,CBLN1,CCDC57,CCDC85B,CCL19,CD151,CD22,CDK2,CDKN2A,CENPB,CGREF1,CITED4,CLEC4A,COL7A1,COPS4,CPLX1,CRCP,CREB3L1,CRYAA,CSHL1,CTNNBL1,CUEDC2,CUX1,CXXC1,CYB5A,CYP27A1,CYP4…
hsa-miR-934	ABHD16B,ACAA1,ADAM2,ADAM21,ADCK2,ADRA1B,ANKRD5,AOC2,APOB,APOC2,APOOL,ARHGAP28,AS3MT,ATG16L2,ATG2A,ATP6AP2,ATP6V1E1,ATXN10,AVEN,B3GALNT2,B4GALNT3,BMS1,BOD1,BRD4,BTK,C11orf53,C11orf88,C15orf55,C19orf48,C3orf23,C3orf25,CACNA2D3,CALHM2,CALY,CAST,CCDC146,CCDC62,CCDC69,CD300LD,CDC42BPB,CHCHD4,CKAP2,CMAHP,CMPK1,COMMD3,COMT,CRCP,CRELD2,CRTAM,CST3,CTBP2,CXCL13,CYHR1,CYP39A1,CYP3A4,DCUN1D3,DDIT3,DDX28,DIAP…
hsa-miR-935	AARS,ABCG5,ACO2,ACTR10,AFM,ANKS3,ANP32B,APOOL,ARIH2,ARMC9,ART1,ASB12,ASPG,ASS1,ATF7IP,ATP6V1B1,ATP9A,AUTS2,AZGP1,B3GAT3,BARHL2,BEST1,BEST2,BMP5,BRD4,BRP44,BSPRY,C11orf49,C12orf24,C12orf4,C14orf118,C16orf74,C17orf81,C1orf109,C1orf63,C20orf111,C21orf2,C22orf28,C2CD3,C2orf50,C3orf67,C6orf154,C7orf42,C9orf3,C9orf40,C9orf84,C9orf85,CA9,CACNA2D2,CARKD,CARS2,CC2D1A,CCDC157,CCDC57,CCDC73,CCT7,CDAN1,CDY1,…
hsa-miR-936	ACRV1,ACSL5,ACTC1,ACTN1,ACVR1,ADAM21,ADORA2B,AFAP1,AGPAT4,AIFM3,ALX1,ANKIB1,ANKRD44,AP2A1,APOBEC2,AQR,ASPRV1,ATG7,ATP2C1,ATP6V1H,ATXN2,AUH,BBX,BCDIN3D,BTNL9,C11orf49,C12orf44,C14orf109,C14orf118,C14orf133,C15orf17,C16orf53,C17orf81,C1orf88,C2,CAD,CCDC23,CCDC71,CCM2,CCT3,CDO1,CDSN,CEACAM20,CENPF,CEP72,CETN2,CHCHD3,CHRNA1,CMA1,CPB2,CRTC3,CSPG5,CUL9,CWF19L2,CYP2J2,DDX1,DDX50,DEFB106A,DEFB106B,DNAH11…
hsa-miR-937	ABHD11,ACADS,ACOX3,ACOXL,ACTL9,ACTR3B,ADAMTS13,ADAT3,AGT,ALDH3A1,AMH,ANGPTL4,ANKMY1,ANKRD24,ANKRD58,AP2S1,ARFGAP1,ARHGAP33,ASIP,ATG9B,ATRIP,BANP,BARHL1,BHLHE23,BRI3,BRSK2,BSX,C11orf75,C15orf40,C15orf48,C17orf101,C17orf74,C17orf82,C19orf20,C19orf26,C19orf33,C1QL2,C1orf86,C20orf144,C2CD4C,C2orf82,C4orf36,C5orf38,C7orf50,C9orf96,CABLES1,CACNA1H,CACNG2,CALCOCO2,CALHM2,CAMK2N2,CARD11,CASKIN1,CBY3,CCDC…
hsa-miR-938	ABCA7,ABCF2,ABHD3,ABTB1,ACAD8,ADAP2,ADH4,ADM,ADRA1B,AEBP1,AKNAD1,AMIGO3,AMOT,ANKLE2,ANXA13,APOOL,AQP6,ASCL2,ASGR1,AURKA,AVEN,BCAP31,BCAT2,BCL2L11,BCOR,BEST2,BMP10,BRD2,BTD,C10orf125,C11orf58,C12orf63,C14orf149,C14orf43,C15orf17,C15orf44,C16orf87,C17orf101,C19orf28,C19orf39,C19orf56,C1orf94,C20orf29,C2orf71,C2orf89,C7orf43,C8orf84,C9orf43,CACNB4,CAPN7,CCDC76,CD72,CDCA5,CERS3,CHST14,CKS1B,CLEC1B,CL…
hsa-miR-939	AANAT,ABHD6,ABTB2,ACCN4,ACHE,ACO2,ADAMTSL1,ADCK4,AGER,ALDH1L2,ALDOB,ALPPL2,ANGPTL6,AP2A2,APBA2,APBB1,ARHGAP33,ATG9A,ATP13A2,ATP8B3,ATPAF2,B3GNT7,B4GALNT3,B4GALT2,B4GALT3,BARHL1,BSND,BSX,C17orf56,C19orf33,C1QTNF1,C1orf109,C1orf86,C22orf23,C22orf40,C2CD3,C8orf58,C9orf167,CA4,CACNG7,CAPG,CBY1,CCDC142,CCDC40,CD151,CD79A,CD97,CDHR5,CHRD,CIB2,CLDN14,CNGB1,CNN1,COL16A1,COPZ2,CORO1B,CPT1C,CRHR2,CROCC,CTN…
hsa-miR-93_star	A3GALT2P,ABI2,AFG3L1P,AKR1B1,ALDH2,ANXA13,AOAH,ARID1A,ATPAF2,B3GALNT2,BRSK1,BTBD8,C21orf58,C2orf27B,C2orf40,C2orf57,C8orf84,C9orf68,C9orf9,CARS,CARS2,CCDC33,CCDC86,CD300LF,CD72,CLVS2,CNIH2,CRABP2,CST1,CST2,CST4,CST5,CTSF,CXCR3,DCTN3,DEFB104A,DEFB104B,DNASE1L1,DSG2,DYM,ECE1,EIF2B2,ELMOD3,EPC1,EXOC3L4,FADS6,FAM19A3,FES,GADD45G,GIPC1,GNB3,GPR17,GPSM2,GSS,HIST2H2AA3,HSPB3,IL9R,KCNC1,KIF15,LAG3,LBP,LC…
hsa-miR-940	AAMP,ABHD1,ABHD14B,ACE,ACVRL1,ADAT3,AFF4,AHSA1,AIP,AKR7A2,ALDH1L1,AMDHD2,ANGPT4,ANGPTL4,ANKMY1,ANKRD58,ANO8,AP2S1,APBB1,APOE,ARF5,ARHGAP10,ATAD3B,ATG2A,ATP2A1,ATP5D,ATP6V0E1,ATP7B,AVPR2,AZGP1,B9D2,BARHL1,BCKDK,BCL3,BIRC7,BMP1,C10orf27,C14orf70,C15orf38,C16orf42,C16orf53,C17orf56,C19orf56,C1orf35,C1orf85,C20orf29,C3orf20,C8G,C9orf142,C9orf16,CABP1,CABP2,CACNA1G,CCDC136,CCDC167,CCL1,CDAN1,CDC34,CDH…
hsa-miR-941	AARS2,ABCA2,ACOX3,ADRA1B,ADRBK1,AFG3L1P,AHSA1,AIG1,AKT2,ALDH4A1,ALKBH4,ALKBH6,AMDHD2,AMN,AMOT,AP2A2,AP2S1,APOBEC3H,APOL2,ARHGAP32,ARHGAP4,ARHGDIB,ARL14,ASCL4,ASH2L,ATXN7L1,BARHL1,BARX1,BHLHA15,BMP3,BRF1,BST2,C10orf93,C11orf80,C12orf43,C14orf80,C15orf27,C16orf42,C17orf101,C17orf46,C19orf28,C19orf48,C1QTNF4,C1orf122,C1orf228,C6orf192,C7orf25,C9orf169,CABP7,CACNG1,CAMK1D,CAPN12,CASC5,CCDC12,CCDC37,C…
hsa-miR-942	AANAT,ABCA2,ADCK2,AICDA,AK2,ALKBH3,ALMS1,AMOTL1,ANGPTL4,ANKRD56,AP2A1,APLNR,ARFIP2,ARPC3,ASB10,ASS1,ASTN2,ATF1,ATP12A,BEAN1,BMPR1B,BMS1,BNIP1,BOLA1,BST2,C12orf10,C16orf53,C17orf53,C17orf74,C19orf18,C1QTNF9,C1QTNF9B,C1orf177,C1orf50,C7orf25,C7orf59,C8orf34,C8orf47,C9orf117,C9orf43,CAPN13,CAPS2,CBS,CCDC107,CCDC82,CCL25,CD300LG,CDH16,CDKN2D,CHD8,CHIT1,CHRNA1,CLCN3,CLDN14,CLDN15,CLLU1OS,CLN3,COG4,COL…
hsa-miR-943	AADACL4,ACAA1,ACAD10,ACAD8,ACAT1,ACRBP,ACSF3,ACTB,ADA,ADAM18,ADH5,AEBP1,ALKBH3,ALOX12,ALS2CR11,ANKRD44,ANO2,APOL2,AQP10,AQP4,AQR,ARHGAP10,ARHGAP22,ARL1,ARSF,ARSH,ASAH1,ASL,ATIC,ATP13A4,ATP1A1OS,ATP2B2,ATRNL1,AWAT1,B3GALT1,B9D2,BANF1,BATF,BLMH,BPIFB4,BST2,BYSL,C10orf90,C12orf5,C13orf27,C16orf57,C16orf74,C16orf95,C17orf72,C19orf53,C1orf228,C20orf160,C2orf82,C6orf201,C9orf11,C9orf117,C9orf3,C9orf4,C…
hsa-miR-944	AASS,ABCA6,ABHD5,ACYP2,ADAM2,ADAM29,ADH5,AIM2,AIMP1,ALKBH2,ALS2CR8,ANAPC10,ANGPTL5,ARHGEF35,ATP2C2,AUH,B4GALT4,BAMBI,BBS9,BCAR3,BCL2L14,BRD1,BRDT,BRI3,BRIP1,C11orf73,C12orf5,C14orf2,C16orf61,C17orf47,C1QBP,C1orf168,C20orf26,C4BPA,C4orf47,C5orf32,C5orf34,C6orf58,C7orf36,C7orf46,C8orf34,C9orf43,C9orf84,CA1,CACNB4,CALM2,CAMSAP3,CAPN13,CAT,CCDC138,CCDC148,CCDC58,CCK,CCL8,CCM2,CCRL1,CDC40,CDH19,CDH6,C…
hsa-miR-95	ACSM3,ACTA1,ACTB,ADI1,AJAP1,AKR7A2,ALKBH3,AMACR,AMICA1,ANKMY2,ANKRD17,ARPP19,ARX,ATP6V1E2,ATP8B3,BAI3,BLNK,BPIFB3,BTBD11,BUB1,BYSL,C10orf137,C13orf30,C14orf135,C16orf61,C17orf79,C19orf56,C19orf77,C1QB,C1orf123,C2orf42,C9orf156,C9orf85,CACNA1E,CAPZA1,CASP2,CCNI,CCT2,CD151,CDH23,CDKL3,CDX1,CDY2B,CETN3,CFLAR,CGNL1,CHI3L2,CHST9,CLCF1,CLEC17A,CLEC4F,CLP1,CNIH4,COL16A1,COQ5,CPS1,CPSF4,CPT1A,CTSL2,CUL4B…
hsa-miR-96	ACCN2,ACCS,ACO1,ACTR5,ADCK1,ADCK2,ADCK3,ADCY5,ADRA1B,ADSS,AGRN,AIG1,AIRE,ALG6,ANKRD44,ANKRD7,ANKS3,ANLN,ANO10,AOAH,APRT,AQP5,ARL4D,ARL6IP4,ARRDC5,ARSJ,AS3MT,ASB2,ASB3,ATP6V1G3,AVIL,B3GNTL1,BAI3,BAIAP3,BET1L,BIRC2,BRF2,BTK,C10orf93,C12orf24,C12orf52,C12orf59,C12orf60,C16orf62,C17orf79,C1orf101,C1orf216,C1orf38,C3orf25,C3orf45,C5,C5orf48,C5orf63,C6orf72,C7orf26,C9orf24,CABP1,CACNA1G,CAPNS1,CAPZA3,C…
hsa-miR-96_star	ADCK1,ANGPTL5,ANXA10,ART5,ASPA,ATF7IP,C1orf105,CACNA2D3,CBWD1,CBWD3,CBWD5,CBWD6,CCM2,CDC45,CEP192,CNTN1,CNTNAP3,CNTNAP3B,CNTRL,CR1,CR1L,CYB5R2,CYP20A1,CYorf17,DPY30,FAM26D,FGB,GAD1,GEMIN8,GPR37,HBG2,HSPE1,IDH2,ILK,ITPR1,KCNK17,KIAA0090,LCK,LDLRAD1,LECT2,LEPRE1,LGI1,LRRC70,MPP4,NARS2,NKAIN4,NR6A1,PCCA,PCDHA8,PCOLCE2,PIWIL1,PLS3,PTS,RBM27,REV1,RPL39L,SDHB,SHCBP1L,SIGLEC6,SLC10A4,SLC33A1,SLC46A3,SLC…
hsa-miR-98	ABCB9,ABCC2,ACADVL,ACCN3,ACTA1,ADAM30,ADAMTS12,ADAMTS8,ADM,ADORA2B,ADRB2,AEN,AGPAT4,ALG14,AP2S1,APOBEC1,ASNA1,ATOX1,ATP13A2,ATP2A2,AVEN,AVL9,B3GNT1,BCAM,BEST1,BEST2,BEST3,BRD3,BRF2,BUB1B,BZW1,C11orf84,C14orf28,C15orf39,C17orf62,C18orf21,C19orf52,C19orf53,C2,C20orf54,C6orf103,C8orf58,C9orf117,C9orf23,C9orf40,C9orf68,C9orf85,CALHM3,CAPRIN2,CCDC136,CCDC148,CCDC22,CCDC64,CCDC81,CCDC94,CCNB2,CDC34,CDH…
hsa-miR-99a	ACSF3,ADAD2,ADAMTS6,ADAT1,AFAP1L1,AICDA,AJAP1,AKAP1,ALDH4A1,ALPK2,ANKMY1,APBA3,ARHGEF25,ARID3A,ARL4D,ART3,ASNS,ATF6B,ATG16L2,ATP11C,ATP13A4,ATP6V0B,ATP9A,BATF,BCDIN3D,BCL6B,BIN2,BPGM,BTBD17,C10orf71,C11orf42,C11orf52,C16orf42,C17orf85,C18orf55,C19orf10,C19orf18,C19orf21,C19orf69,C1orf111,C1orf130,C20orf46,C2orf85,C3orf49,C3orf80,C5orf22,C6orf126,C6orf64,C7orf50,CARD9,CBY1,CC2D1A,CCDC134,CCDC152,C…
hsa-miR-99a_star	ADAT3,ADPRHL2,ALS2CR12,AMPD3,APLF,ARHGEF35,ATP9A,BBS2,BRD8,C14orf105,C17orf107,C17orf108,C20orf43,C4orf17,CALHM1,CCDC58,CD320,CD4,CD84,CDH16,CDK7,CHI3L1,CHRNB3,CNTRL,COX5A,CREM,CUX1,CYP2A6,DARS2,DDI2,DDT,DEFA4,DLGAP1,DNAI2,DPH5,DUSP27,EIF2AK4,ENGASE,FBXO2,FERD3L,FGFR2,FXYD7,GC,GOLT1A,GON4L,GPR137,GRPR,GTF3A,HCFC2,HDC,HEATR6,HOXD3,IGLON5,IGSF9,IL15RA,IL16,IL29,IL31RA,INSR,ITGAM,KLF2,KLHDC4,KLHL34,…
hsa-miR-99b	ACOT11,ACSF3,ADAD2,ADAT1,AGFG2,AHSA1,AICDA,AJAP1,AKAP1,ALDH4A1,ALG12,ANKRD10,ARAP1,ARHGEF25,ARID3A,ARL4D,ART3,ASPDH,ATF6B,ATG16L2,ATOH8,ATP13A4,ATP6V0B,ATP6V0D1,ATP9A,BCDIN3D,BCL6B,BIN2,BNIPL,BPGM,C11orf42,C11orf52,C12orf12,C16orf42,C17orf56,C17orf85,C19orf10,C19orf18,C19orf21,C19orf48,C19orf69,C20orf201,C2orf85,C3orf49,C3orf80,C5orf22,C5orf42,C6orf64,C7orf26,C7orf50,C7orf68,CAPN13,CAPS,CARD9,CAR…
hsa-miR-99b_star	AARS,ABHD14A,ADAT3,ADPRHL2,ALS2CR12,AMPD3,AQP8,ARHGAP42,ARPC2,ATP9A,BRD8,C10orf95,C11orf31,C17orf107,C4orf17,CALHM1,CCDC87,CD320,CD4,CD84,CDH16,CHI3L1,CHRDL2,CHRNB3,CILP2,COPB2,COX5A,CPT2,CRCT1,CREM,CUX1,CYP2A6,DDI2,DDT,DDX50,DLGAP1,DNAI2,EFEMP2,EIF2AK4,ENGASE,EVI5L,FBXO2,FCGRT,FERD3L,FGFR2,FRMPD3,FXYD7,GBP5,GBX2,GC,GJD2,GLIS1,GLTPD1,GOLT1A,GPR161,GRM5,GTF3A,HAS1,HCFC2,HEATR6,HOXB1,HPX,HS3ST2,IGL…
hsa-miR-9_star	ACOT12,AGBL4,ALDH1A1,ALG13,ANAPC1,ANKRD43,ANUBL1,ARMCX2,ARPC3,ASS1,ATAD5,ATP5L,ATP6V1H,AVPR1A,BACE2,BARX2,BAZ1A,BVES,C17orf48,C19orf26,C2orf89,C3orf33,C5orf22,C5orf32,C9orf156,C9orf5,CASK,CATSPERB,CBWD6,CCDC111,CCDC84,CDC37L1,CDH1,CDH20,CETN2,CETN3,CFHR5,CGA,CHFR,CKAP2,CLK1,CNOT3,COPB1,CPA3,CPLX1,CPO,CTSL2,CUTC,CXCR7,CXorf22,CXorf30,CYYR1,DDX25,DDX27,DGAT2L6,DMP1,DMRT3,DNER,DOLK,DPYSL3,DSCC1,EAPP…

## Sheet: KEGG pathway
KEGG pathway	Gene sets
Glycolysis / Gluconeogenesis	ADH1B,ADH7,ADH4,GCK,PGM1,ALDH9A1,LDHA,ACYP1,PFKP,FBP2,PFKM,PGK1,ADH5,ALDH3B2,PKLR,PDHA2,DLD,ALDOC,PDHB,BPGM,G6PC,ENO3,GAPDHS,PFKL,LDHAL6B,DLAT,PGK2,HK1,HK2,HK3,GALM,ALDH1B1,LDHB,ALDH1A3,GPI,AKR1A1,ALDH7A1,FBP1,ALDH3A2,PDHX,ENO2,ALDOA,ACYP2,ACSS2,ENO1,ALDH3B1,TPI1,ACSS1,ALDOB,PDHA1,ALDH3A1,PKM2,GAPDH,ADH6,HK2,GAPDH,GAPDH,ALDH2,PGAM2,PGAM4,PGAM1,LDHC,ADH1A,ADH1C,PGM3,LDHAL6A,ADHFE1
Citrate cycle (TCA cycle)	PCK1,OGDHL,PCK2,PC,DLD,SUCLG1,ACLY,IDH3G,IDH3B,SDHA,SDHC,SDHB,OGDH,MDH2,DLST,MDH1,SUCLA2,ACO1,IDH3A,FH,IDH1,IDH2,ACO2,SUCLG2,SDHD,CLYBL,CS
Pentose phosphate pathway	PRPS1,PGM1,RBKS,PFKP,DERA,FBP2,PFKM,TKT,TKTL1,ALDOC,PRPS1L1,PFKL,RPE,TKTL2,TALDO1,G6PD,H6PD,PGD,PGLS,GPI,RPIA,FBP1,ALDOA,ALDOB,PRPS2,PGM3,G6PD
Inositol metabolism	ALDH6A1,TPI1
Pentose and glucuronate interconversions	DCXR,UGT2B15,UGT2B10,UGT2A1,GUSB,RPE,UGT2B4,UGT2B11,UGP2,AKR1B1,UGT1A1,UGDH,UGT2B17,UGT2B28,UGT2B7
Fructose and mannose metabolism	SORD,FUK,PGM2,PFKP,GMPPA,UGGT1,FBP2,PFKM,MPI,PMM1,AKR1B10,HSD17B12,GMDS,B4GALNT4,ALDOC,MTMR2,UGGT2,PFKFB3,PFKL,PFKFB2,RDH13,MTMR1,HK1,TSTA3,OGT,HK2,PHPT1,HK3,RDH12,PFKFB1,HSD3B7,STT3B,PFKFB4,FPGT,FBP1,B4GALNT3,ALDOA,AKR1B1,TPI1,ALDOB,KHK,GMPPB,HK2,PMM2,MTMR6,GALNTL5,UGGT2,GMDS,RDH14,RDH11
Galactose metabolism	GCK,GAA,PGM1,PFKP,GLA,LALBA,PFKM,AKR1B10,GALK2,MGAM,HSD17B12,G6PC,PFKL,B4GALT1,RDH13,HK1,HK2,GALK1,HK3,RDH12,GLB1,HSD3B7,UGP2,AKR1B1,GALT,LCT,HK2,GALE,B4GALT2,PGM3,RDH14,RDH11,GANC
Ascorbate and aldarate metabolism	ALDH9A1,AKR1B10,HSD17B12,RDH13,RDH12,ALDH1B1,ALDH1A3,HSD3B7,ALDH7A1,ALDH3A2,ALDH3A1,ALDH2,RDH14,RDH11
Fatty acid biosynthesis	OLAH,OXSM,FASN,ACACA,ACACB,MCAT
Fatty acid elongation in mitochondria	PPT1,ECHS1,HSD17B10,MECR,ACAA2,PPT2,HSD17B4,HADH,HADHB,HADHA
Fatty acid metabolism	ADH1B,ADH7,ADH4,CYP4A11,ALDH9A1,ACSL5,ACSL6,ECI2,ECHS1,ADH5,CPT1C,CYP4F12,HSD17B10,CYP4F11,ACAA2,ACAT1,CYP4F8,ACSL4,ACAD10,ECI1,ACSL1,HSD17B4,EHHADH,ALDH1B1,HADH,CPT1B,ACAD11,ACOX2,ACADM,ALDH1A3,ACOX1,ACADL,ACOX3,ALDH7A1,ALDH3A2,CPT1A,ACADS,HADHB,HADHA,ALDH3A1,GCDH,ACAT2,ADH6,ALDH2,ACAA1,ADH1A,ADH1C,ACSL3,CPT2,ADHFE1,CYP4A11
Synthesis and degradation of ketone bodies	HMGCS2,ACAT1,BDH1,OXCT1,HMGCS1,OXCT2,HMGCL,ACAT2,
Biosynthesis of steroids	IDI2,EBP,PMVK,SQLE,MVK,MVD,IDI1,SC5DL,VKORC1,FDPS,NQO1,DHCR7,CYP27B1,IDI2,FDFT1,LSS,HMGCR,GGPS1
Bile acid biosynthesis	ADH1B,ADH7,SRD5A1,ADH4,CYP7A1,ALDH9A1,ACAD8,ADH5,ACADSB,AKR1B10,HSD17B12,ACAA2,AKR1D1,BAAT,RDH13,RDH12,ALDH1B1,ACADVL,SRD5A2,ALDH1A3,HSD3B7,ALDH7A1,SOAT1,ALDH3A2,HADHB,CYP27A1,ALDH3A1,CEL,AKR1C4,ACAD9,ADH6,ALDH2,LIPA,ACAA1,ADH1A,ADH1C,SOAT2,RDH14,RDH11,ADHFE1
Ubiquinone biosynthesis	COQ5,COQ6,COQ2,COQ7,NDUFA12,NDUFB11,NDUFA13,COQ3,COQ2
C21-Steroid hormone metabolism	HSD11B2,CYP11B1,HSD11B1,AKR1D1,CYP11A1,HSD3B1,CYP17A1,AKR1C4,CYP11B2,HSD3B2,CYP21A2
Androgen and estrogen metabolism	HSD17B3,SRD5A1,HSD11B2,PRMT1,PRMT6,METTL6,UGT2B15,PRMT3,PRMT2,HSD17B2,CYP11B1,HSD11B1,LCMT2,UGT2B10,AKR1D1,UGT2A1,UGT2B4,CARM1,LCMT1,UGT2B11,HSD3B1,PRMT5,SULT2B1,ARSE,HSD17B8,METTL2B,SRD5A2,SULT1E1,HSD17B7,PRMT8,SULT2A1,HEMK1,STS,ARSD,UGT1A1,AKR1C4,UGT2B17,HEMK1,CYP11B2,WBSCR22,UGT2B28,PRMT7,HSD17B1,HSD3B2,UGT2B7,HSD17B1,STS,STS,LCMT2,BCO2
Oxidative phosphorylation	ATP5G3,COX5B,ATP6AP1,NDUFV1,UQCR11,NDUFB9,ATP6V0A2,COX15,ATP4A,NDUFA4,ATP6V1B1,COX7A2,NDUFA9,ATP6V1F,ATP5G1,NDUFC1,ATP5I,ATP6V1C1,NDUFS8,ATP6V0A4,ATP6V0D1,NDUFB3,UQCRC1,ATP6V1G3,UQCRB,UQCRQ,ATP12A,NDUFS2,ATP5E,NDUFB1,NDUFAB1,NDUFA3,NDUFS7,ATP5J,ATP6V1G2,COX6A2,ATP5C1,ATP6V1D,NDUFA6,COX4I2,NDUFA10,UQCR10,CYC1,ATP6V1B2,ATP5A1,NDUFB4,NDUFA7,COX7A2L,COX6C,COX6A1,ATP6V1G1,ATP6V0C,COX5A,NDUFA11,ATP5B,N…
ATP synthesis	ATP5G3,ATP6AP1,ATP6V0A2,ATP6V1B1,ATP6V1F,ATP5G1,ATP5I,ATP6V1C1,ATP6V0A4,ATP6V0D1,ATP6V1G3,ATP5E,ATP5J,ATP6V1G2,ATP5C1,ATP6V1D,ATP6V1B2,ATP5A1,ATP6V1G1,ATP6V0C,ATP5B,ATP5O,ATP5D,ATP6V0D2,ATP6V0A1,ATP6V1A,ATP6V0E1,ATP5L,ATP6V1H,TCIRG1,ATP5H,ATP5F1,ATP6V1E1,ATP5J2,ATP5G2,ATP6V1C2,ATP6V0B,ATP5J2,ATP6V1E2
Urea cycle and metabolism of amino groups	NAGS,GATM,SRM,CKMT2,GAMT,OTC,CPS1,ASS1,PYCR1,PYCRL,CKB,SARDH,ARG2,CKM,ACY1,GLUD2,CKMT1B,ARG1,ODC1,GLUD1,ALDH18A1,OAT,ASL,PYCR2,CKMT1A,SMS
Purine metabolism	PRPS1,XDH,DCK,CANT1,NME4,PDE8A,AK4,POLR2G,GUCY1A3,POLR2E,APRT,POLR2I,PDE6H,ZNRD1,POLR3B,NT5C,PNP,ADSL,GUCY1B3,NPR2,POLR2C,POLD3,AMPD2,POLR1B,AMPD1,PDE4A,ATIC,PKLR,NT5C2,ALLC,POLE3,PDE4D,NT5C1B,ENTPD2,GUCY2F,PDE4C,NUDT9,NT5E,POLE2,PRPS1L1,AK1,TYMP,ENPP2,PDE1A,ADCY1,PDE4B,POLA2,RRM2,POLR2A,POLD1,POLR3G,POLD2,NT5C1A,ADCY10,PPAT,PDE10A,POLR2K,PAPSS1,GMPR2,GUK1,PNPT1,ADCY9,GUCY1B2,HPRT1,ITPA,POLR2H,PO…
Pyrimidine metabolism	DCK,UMPS,CANT1,NME4,UCK1,CMPK1,POLR2G,POLR2E,POLR2I,ZNRD1,POLR3B,NT5C,PNP,POLR2C,POLD3,POLR1B,NT5C2,POLE3,NT5C1B,UPP2,AICDA,NT5E,POLE2,TYMP,DCTD,POLA2,RRM2,CTPS2,POLR2A,POLD1,POLR3G,POLD2,NT5C1A,DPYD,POLR2K,CAD,PNPT1,ITPA,POLR2H,POLR2F,POLR3A,POLR2L,ENTPD3,DPYS,TXNRD2,ENTPD4,RRM1,UCK2,NME1,NME6,CDA,POLE4,DTYMK,POLR3F,CTPS,UPB1,NT5C3,UPP1,AK3,NUDT2,ENTPD6,RFC5,POLR1D,ENTPD8,RRM2B,TK2,NT5M,NME3,TK1…
Glutamate metabolism	NAGK,ALDH4A1,QARS,GSS,ADC,GPT,GLS,CPS1,GLS2,GAD2,GSR,GCLM,PPAT,ABAT,GLUD2,ALDH5A1,CAD,GAD1,GPT2,EPRS,GLUD1,GOT1,GLUL,NADSYN1,GFPT1,GMPS,GOT2,EARS2,GCLC,GFPT2,GNPNAT1,
Alanine and aspartate metabolism	CRAT,AGXT2,ADSL,PC,GPT,ACY3,PDHA2,DLD,AGXT,ASS1,PDHB,ASPA,GAD2,AARS,DLAT,ABAT,CAD,GAD1,GPT2,NARS,ASNS,ADSS,GOT1,PDHX,DARS,PDHA1,DDO,ADSSL1,GOT2,ASL,DARS2
Glycine, serine and threonine metabolism	AMT,CTH,AGXT2,GCAT,SHMT2,GATM,CHKA,BHMT,GAMT,DAO,AKR1B10,CHDH,DLD,HSD17B12,AOC2,AGXT,GNMT,MAOA,SARDH,AOC3,PEMT,RDH13,GARS,RDH12,PISD,SDS,HSD3B7,PIPOX,ALAS1,TARS,PHGDH,PSAT1,PSPH,SHMT1,ALAS2,SARS,CBS,GLDC,SHMT1,ABP1,MAOB,CHKB,DMGDH,RDH14,SARS2,RDH11,
Methionine metabolism	CTH,MAT2B,BHMT,MARS2,DNMT1,MAT1A,AHCY,AHCYL1,MTR,DNMT3A,MAT2A,MTFMT,CBS,AHCYL2,MARS,DNMT3B
Cysteine metabolism	LDHA,CTH,CHST9,GAL3ST4,SULT1B1,CHST8,SULT4A1,GAL3ST3,MPST,CARS,LDHAL6B,SULT1C4,SULT1C2,SDS,CDO1,LDHB,GOT1,CARS2,CHST10,GOT2,GAL3ST2,LDHC,CHST6,LDHAL6A,CHST9,CHST5
Valine, leucine and isoleucine degradation	ALDH9A1,MYST4,MCCC1,HMGCS2,PCCB,ECHS1,PCCA,MCEE,ESCO2,SH3GLB1,HSD17B10,AUH,ACAA2,ACAT1,OXCT1,ALDH6A1,ACAD10,ABAT,NAA20,HMGCS1,AOX1,HIBADH,HSD17B4,EHHADH,NAA10,BCKDHA,ALDH1B1,HADH,BCAT1,ACAD11,ACADM,ALDH1A3,ESCO1,ACADL,OXCT2,ALDH7A1,MUT,MYST3,ALDH3A2,ACADS,BCAT2,IVD,HADHB,HADHA,ALDH3A1,HMGCL,ACAT2,ALDH2,MCCC2,ACAA1,BCKDHB,PNPLA3,DBT
Valine, leucine and isoleucine biosynthesis	ILVBL,PDHA2,PDHB,LARS,BCAT1,IARS,BCAT2,VARS,LARS2,PDHA1
Lysine biosynthesis	KARS,AASS,AASDHPPT,AADAT
Lysine degradation	ALDH9A1,SPCS1,OGDHL,SPCS3,SHMT2,PLOD1,ECHS1,NSD1,AKR1B10,HSD17B12,TMLHE,PLOD3,AASS,HSD17B10,ACAT1,PRSS16,OTUB2,RDH13,HSD17B4,RDH12,EHHADH,ALDH1B1,HADH,ALDH1A3,HSD3B7,PIPOX,OTUB1,PLOD2,SETD7,ALDH7A1,OGDH,COPS5,EHMT1,ALDH3A2,SHMT1,HADHA,SUV39H1,AASDHPPT,DLST,AADAT,ALDH3A1,GCDH,SUV39H2,ACAT2,BBOX1,ALDH2,SHMT1,SETDB1,MLL3,RDH14,EHMT2,DOT1L,RDH11
Arginine and proline metabolism	ALDH9A1,SAT2,SAT1,LOXL1,GATM,SRM,ALDH4A1,CKMT2,GAMT,ADC,DAO,OTC,AOC2,CPS1,AMD1,ASS1,PYCR1,PYCRL,CKB,MAOA,AOC3,ARG2,LOXL4,CKM,GLUD2,ALDH5A1,PARS2,CKMT1B,ALDH1B1,ARG1,ALDH1A3,ODC1,ALDH7A1,EPRS,ALDH3A2,P4HA1,GLUD1,GOT1,P4HA2,OAT,ALDH3A1,AGMAT,LAP3,GOT2,ALDH2,LOXL2,ASL,NOS3,ABP1,NOS1,MAOB,PYCR2,RARS,CKMT1A,P4HA3,LOXL4,NOS1,NOS1,NOS1,NOS2,SMS,LOXL3
Histidine metabolism	PRPS1,HDC,ALDH9A1,PRMT1,PRMT6,HNMT,ALDH3B2,ACY3,AOC2,METTL6,PRMT3,PRMT2,ASPA,MAOA,HAL,AOC3,LCMT2,CARM1,UROC1,LCMT1,DDC,PRMT5,CNDP1,FTCD,HARS2,METTL2B,ALDH1B1,ALDH1A3,ALDH7A1,ALDH3A2,PRMT8,HEMK1,ALDH3B1,HARS,ALDH3A1,HEMK1,ALDH2,WBSCR22,ABP1,PRMT7,MAOB,PRPS2,LCMT2
Tyrosine metabolism	ADH1B,ADH7,ADH4,PNMT,HPD,PRMT1,PRMT6,MYST4,FAH,ADH5,ALDH3B2,ESCO2,SH3GLB1,AOC2,METTL6,PRMT3,PRMT2,TAT,MAOA,ECH1,AOC3,LCMT2,TYRP1,DCT,CARM1,LCMT1,DDC,PRMT5,HGD,NAA20,COMT,AOX1,MIF,METTL2B,NAA10,TH,ALDH1A3,ESCO1,TPO,MYST3,GOT1,TYR,PRMT8,HEMK1,ALDH3B1,ALDH3A1,ADH6,DBH,HEMK1,GOT2,WBSCR22,ABP1,PRMT7,ADH1A,MAOB,ADH1C,PNPLA3,GSTZ1,DBT,ADHFE1,LCMT2
1,1,1-Trichloro-2,2-bis(4-chlorophenyl)ethane (DDT) degradation	ALOXE3,DHCR24,BCO2
Phenylalanine metabolism	PRDX6,HPD,MYST4,ALDH3B2,ESCO2,SH3GLB1,AOC2,TAT,MAOA,AOC3,LPO,EPX,DDC,NAA20,MIF,NAA10,MPO,ALDH1A3,ESCO1,TPO,MYST3,GOT1,ALDH3B1,ALDH3A1,GOT2,ABP1,MAOB,PNPLA3,DBT
gamma-Hexachlorocyclohexane degradation	ACP5,ALPI,DHRS7,ALPL,CYP3A7,DHRSX,CYP4F12,CYP4F11,CYP4F8,DHRS2,ALPP,DHRS3,ACPT,CYP3A43,ALPPL2,DHRS1,PON1,ACPP,PON3,PON2,ACP2,ACP1,ACP6,CYP3A5,CYP3A4
Benzoate degradation via hydroxylation	ECH1,ACAA2,ALOXE3,HADHB,ACAA1,BCO2
Bisphenol A degradation	DHRS7,AKR1B10,DHRSX,HSD17B12,DHRS2,DHRS3,RDH13,DHRS1,PON1,RDH12,PON3,HSD3B7,PON2,RDH14,RDH11
Tryptophan metabolism	IDO1,CYP1A2,ALDH9A1,TRIM11,OGDHL,PRMT1,PRMT6,MID1,CYP1A1,ECHS1,CCNB1IP1,UHRF1,UBE3C,CYP4F12,MIB1,AOC2,RNF144B,METTL6,PRMT3,PRMT2,CYP1B1,HSD17B10,MAOA,TDO2,CYP4F11,AOC3,LCMT2,ACAT1,ALOXE3,CYP4F8,AMFR,CARM1,LCMT1,DDC,PRMT5,HAAO,TRIM5,TPH2,AOX1,HSD17B4,DZIP3,NFX1,EHHADH,AANAT,METTL2B,ALDH1B1,HADH,ALDH1A3,KYNU,RNF25,SIAH2,ALDH7A1,MYLIP,OGDH,CNOT4,LRSAM1,WARS,DHCR24,ALDH3A2,CAT,PRMT8,HADHA,HEMK1,LNX1,…
Phenylalanine, tyrosine and tryptophan biosynthesis	FARSA,TAT,YARS,ENO3,FARSB,FARS2,GOT1,YARS2,ENO2,ENO1,GOT2,PAH
Novobiocin biosynthesis	TAT,GOT1,GOT2
beta-Alanine metabolism	ALDH9A1,SRM,ECHS1,AOC2,AOC3,GAD2,ACAD10,DPYD,ABAT,CNDP1,GAD1,EHHADH,ALDH1B1,ACAD11,DPYS,ACADM,ALDH1A3,ACADL,UPB1,ALDH7A1,ALDH3A2,HADHA,ALDH3A1,ALDH2,MLYCD,ABP1,SMS
Taurine and hypotaurine metabolism	GAD2,CSAD,BAAT,GAD1,GGT7,GGT5,CDO1,GGT3P,GGTLC2,GGT1
Aminophosphonate metabolism	PRMT1,PRMT6,METTL6,PRMT3,PRMT2,LCMT2,CHPT1,CARM1,LCMT1,PRMT5,METTL2B,PRMT8,HEMK1,PCYT2,HEMK1,WBSCR22,PRMT7,PCYT1B,LCMT2
Selenoamino acid metabolism	CTH,PRMT1,PRMT6,MAT2B,MARS2,SEPHS2,SEPHS1,METTL6,PRMT3,PRMT2,LCMT2,MAT1A,CARM1,LCMT1,PRMT5,PAPSS1,AHCY,METTL2B,GGT7,GGT5,SCLY,AHCYL1,PRMT8,MAT2A,HEMK1,PAPSS2,CBS,GGT3P,HEMK1,AHCYL2,MARS,GGTLC2,GGT1,WBSCR22,PRMT7,LCMT2
Cyanoamino acid metabolism	SHMT2,GBA,GGT7,GGT5,SHMT1,GGT3P,GGTLC2,SHMT1,GGT1,GBA3,GBA
D-Glutamine and D-glutamate metabolism	GLS,GLS2,GLUD2,GLUD1
D-Arginine and D-ornithine metabolism	DAO
Glutathione metabolism	ANPEP,GSTM3,GPX2,GPX7,GSTM5,GPX1,MGST2,GSS,GSTA2,GSTA3,GSTO1,MGST3,GSTO2,GPX5,GSTT1,GSR,GSTM2,GSTM1,OPLAH,GCLM,GSTM4,MGST1,GSTK1,GGT7,GPX4,GGT5,GSTA1,GPX6,G6PD,GSTA4,GSTP1,IDH1,GGT3P,IDH2,GGTLC2,GGT1,GSTA5,GSTT2,GCLC,GSTZ1,G6PD,GSTT1,GPX3
Starch and sucrose metabolism	AGL,GCK,GAA,PGM1,RAD54B,DHX58,MOV10L1,GYS2,MGAM,ATP13A2,TREH,DDX23,UGT2B15,PYGM,IFIH1,ENPP2,UGT2B10,G6PC,UGT2A1,SNRNP200,GUSB,PYGL,GBA,UGT2B4,SMARCA2,UGT2B11,DDX18,PYGB,HK1,GYS1,HK2,HK3,SI,NUDT8,GBE1,SETX,GPI,ERCC3,DDX41,AMY2B,ASCC3,ENPP3,ERCC2,FBXO18,DDX54,RUVBL2,UGP2,DDX50,ENPP1,UGT1A1,NUDT5,SMARCA5,LYZL1,UGDH,UGT2B17,DDX52,HK2,EP400,RAD54L,GBA3,UGT2B28,UGT2B7,AMY2A,DDX56,AMY1A,PGM3,GBA,DDX47,R…
N-Glycan biosynthesis	DOLPP1,ALG2,MGAT2,MAN1A1,MAN2A2,MGAT4A,MAN1C1,ST6GAL1,ALG6,B4GALT1,MGAT3,MAN1B1,B4GALT3,FNTB,DHDDS,B4GALT5,RPN2,ALG14,MAN2A1,MAN1A2,ALG3,ALG8,ALG5,ALG11,MOGS,RPN1,MGAT1,DDOST,DPAGT1,ALG12,MGAT4B,ALG1,GANAB,B4GALT2,MGAT5,DPM1,FUT8,ALG10,ALG9
N-Glycan degradation	FUCA2,MAN2C1,ENGASE,HEXB,MAN2B2,NEU3,AGA,MAN2B1,FUCA1,GLB1,MANBA,NEU1,NEU2,LCT,NEU4,MAN2C1,HEXA,HEXA
O-Glycan biosynthesis	GALNTL1,GALNT12,ST6GALNAC1,GALNT3,C1GALT1,GALNT5,GALNT9,B3GNT6,ST3GAL2,ST3GAL1,GALNTL6,GALNTL2,GALNT14,GALNT13,WBSCR17,GALNT6,GALNT8,GALNT1,GCNT1,GALNT7,GALNT10,GALNT11,GALNT2,GALNTL4,GALNT9
Nucleotide sugars metabolism	TGDS,AKR1B10,HSD17B12,EDEM1,RDH13,RDH12,HSD3B7,CTBS,UGP2,GALT,EDEM3,UGDH,GALE,RDH14,RDH11,EDEM2,UXS1
Streptomycin biosynthesis	GCK,PGM1,TGDS,IMPA2,HK1,ISYNA1,HK2,HK3,HK2,IMPA1,PGM3
Aminosugars metabolism	GNE,NAGK,GNPDA2,HEXB,CHIA,RENBP,MTMR2,CHIT1,EDEM1,CMAS,CYB5R1,MTMR1,HK1,HK2,PHPT1,HK3,AMDHD2,UAP1,CTBS,NANS,EDEM3,CYB5R3,GFPT1,HK2,HEXA,GNPDA1,MTMR6,PGM3,GFPT2,GNPNAT1,HEXA,EDEM2
Glycosaminoglycan degradation	SGSH,HPSE,NAGLU,HEXB,HYAL1,HYAL2,IDUA,SPAM1,ARSB,GUSB,GALNS,GNS,GLB1,IDS,HPSE2,LCT,HEXA,HPSE2,HPSE2,HEXA
Chondroitin sulfate biosynthesis	CHST11,XYLT1,CHSY1,CHST7,CHST3,CHST12,CHSY3,B3GALT6,CHST15,CHST13,B3GAT1,CHST14,B4GALT7,XYLT2,B3GAT3,CHPF,CSGALNACT1,CHPF2,UST,CSGALNACT2,B3GAT2,
Keratan sulfate biosynthesis	B3GNT1,CHST2,CHST1,B3GNT2,CHST4,B4GALT1,B4GALT3,ST3GAL2,B4GALT5,ST3GAL1,ST3GAL4,ST3GAL3,B4GALT2,FUT8,CHST6
Heparan sulfate biosynthesis	HS3ST3B1,HS2ST1,HS3ST2,EXTL1,HS6ST3,GLCE,NDST1,EXTL2,EXT2,HS6ST2,HS3ST3A1,NDST3,EXTL3,EXT1,HS3ST1,HS6ST1,NDST4,HS3ST5,NDST2,HS3ST4,HS3ST2
Peptidoglycan biosynthesis	PGLYRP2,GLUL
Glycerolipid metabolism	ADH1B,ADH7,ADH4,GK,ALDH9A1,DAK,UGGT1,GPAM,GLA,PNLIPRP1,ADH5,GK2,B4GALNT4,LPL,UGGT2,DGKE,DGKI,AGPAT3,MGLL,AGPAT2,AGPAT4,AGPAT6,PPAP2B,OGT,AGPAT1,PNLIPRP2,ALDH1B1,GLB1,ALDH1A3,LIPG,PPAP2C,DGKD,AKR1A1,STT3B,ALDH7A1,ALDH3A2,PNLIP,DGKZ,B4GALNT3,AKR1B1,DGAT1,LIPF,DGKA,ALDH3A1,CEL,LCT,DGKB,DGKQ,ADH6,ALDH2,LIPA,GALNTL5,ADH1A,LIPC,ADH1C,PNPLA3,UGGT2,DGKH,DGKG,PPAP2A,ADHFE1
Inositol phosphate metabolism	ITPKA,IPMK,INPP1,PIK3CG,PIP4K2A,PLCD1,PIK3CA,PLCZ1,INPP5E,MINPP1,OCRL,MIOX,ITGB1BP3,PIP4K2C,FN3K,PIKFYVE,PIK3CB,PLCG1,PIP5K1C,PLCB2,IMPA2,PLCD3,ISYNA1,PLCG2,PLCB1,SYNJ2,DYRK4,INPP5B,PIK3C3,INPP4A,PLCB4,SYNJ1,C9orf95,PTEN,INPP5J,PIK3CD,INPP5A,PLCB3,INPPL1,ITPKB,PI4KA,INPP4B,PIP5K1B,PIK3CA,SHPK,EIF2AK3,INPP5K,PI4KB,PLCD4,PLCE1,PIP5K1A,IMPA1,ITPKB,PIP5K1A,PIP4K2B
Glycosylphosphatidylinositol(GPI)-anchor biosynthesis	PIGG,PIGA,PIGN,PIGK,PIGC,PIGX,PGAP1,PIGU,PIGV,PIGW,PIGT,PIGS,PIGF,PIGL,PIGZ,PIGO,GPLD1,PIGM,PIGH,PIGB,GPAA1,PIGP,PIGP,PIGQ
Glycerophospholipid metabolism	PLA2G1B,PTDSS2,ETNK1,MYST4,GPAM,CHKA,PAFAH1B1,ESCO2,PLD2,AKR1B10,HSD17B12,SH3GLB1,PLA2G3,ACHE,PLA2G6,PLA2G2D,DGKE,DGKI,AGPAT3,PLA2G2E,PEMT,PTDSS1,CHPT1,CHAT,PLA2G2F,PLA2G5,AGPAT2,RDH13,PLA2G12B,AGPAT4,AGPAT6,NAA20,PLD1,LCAT,PLA2G12A,PPAP2B,PHOSPHO1,AGPAT1,RDH12,PISD,NAA10,HSD3B7,ESCO1,PPAP2C,PLA2G2A,PAFAH1B3,DGKD,CDS2,PAFAH2,MYST3,PLA2G4A,GNPAT,DGKZ,GPD2,AGPS,GPD1,DGKA,LYPLA2,DGKB,PLA2G10,PCYT2,P…
Arachidonic acid metabolism	PLA2G1B,CYP2B6,CYP4A11,GPX2,CYP2E1,GPX7,ALOX15,GPX1,AKR1C3,CBR1,ALOX5,CYP4F3,CYP2U1,ALOX15B,HPGDS,ALOX12B,PTGES,PLA2G3,CYP2J2,CBR3,PLA2G6,PLA2G2D,PTGS2,PTGS1,EPHX2,GPX5,PLA2G2E,CYP2C19,CYP2C9,PLA2G2F,PTGIS,PLA2G5,PLA2G12B,PLA2G12A,GGT7,GPX4,GGT5,PTGDS,GPX6,PLA2G2A,PTGES2,PLA2G4A,CYP2C18,TBXAS1,LTA4H,CYP4F2,PLA2G10,GGT3P,GGTLC2,GGT1,ALOX12,DHRS4,LTC4S,CYP2C8,CYP4A11,GPX3
Linoleic acid metabolism	PLA2G1B,CYP1A2,CYP2E1,FADS3,ALOX15,ALOX5,CYP3A7,AKR1B10,HSD17B12,PLA2G3,CYP2J2,PLA2G6,PLA2G2D,PLA2G2E,CYP2C19,CYP2C9,PLA2G2F,CYP3A43,PLA2G5,RDH13,PLA2G12B,PLA2G12A,RDH12,HSD3B7,PLA2G2A,PLA2G4A,FADS2,FADS1,CYP2C18,PLA2G10,CYP3A5,RDH14,CYP2C8,RDH11,CYP3A4
Sphingolipid metabolism	GAL3ST1,ACER3,SGPP1,SMPD2,SPHK1,GLA,KDSR,ARSA,SPTLC1,ENPP7,UGT8,DEGS2,NEU3,CERK,GBA,DEGS1,UGCG,SMPD3,ARSE,PPAP2B,SPTLC2,GLB1,PPAP2C,SMPD1,SGPL1,GALC,NEU1,ASAH1,SPHK2,ARSD,NEU2,LCT,NEU4,B4GALT6,SGPP2,UGCG,SGMS2,SGMS1,PPAP2A,GBA
Glycosphingolipid biosynthesis - lactoseries	FUT1,FUT3,B3GALT2,FUT2,ST3GAL4,ST3GAL3,ABO,B3GALT5,B3GALT1,B3GNT5
Glycosphingolipid biosynthesis - neo-lactoseries	FUT7,B3GNT1,B4GALT4,FUT9,B3GNT3,FUT1,ST3GAL6,FUT3,B3GNT2,B4GALT1,B4GALT3,B3GNT4,FUT4,ST8SIA1,GCNT2,FUT4,FUT2,FUT5,FUT6,B4GALT2,ABO,B3GNT3,FUT6,B3GNT5
Glycosphingolipid biosynthesis - globoseries	FUT9,GLA,HEXB,FUT1,NAGA,A4GALT,ST3GAL2,ST3GAL1,ST8SIA1,B3GALNT1,GBGT1,FUT2,HEXA,B3GALT5,HEXA
Glycosphingolipid biosynthesis - ganglioseries	ST6GALNAC4,HEXB,ST6GALNAC6,B4GALNT1,ST6GALNAC5,ST6GALNAC3,ST3GAL2,ST3GAL1,ST8SIA1,ST3GAL5,GLB1,ST8SIA5,SLC33A1,B3GALT4,LCT,HEXA,ST6GALNAC3,ST6GALNAC3,HEXA
Pyruvate metabolism	PCK1,ALDH9A1,LDHA,ACYP1,ME1,PCK2,PC,PKLR,HAGHL,PDHA2,DLD,GRHPR,HAGH,ACACA,PDHB,ME3,ACAT1,ME2,ACACB,GLO1,LDHAL6B,DLAT,LDHD,ALDH1B1,LDHB,ALDH1A3,ALDH7A1,ALDH3A2,PDHX,ACYP2,ACSS2,MDH2,AKR1B1,MDH1,ACSS1,PDHA1,ALDH3A1,PKM2,ACAT2,ACOT12,ALDH2,LDHC,LDHAL6A
2,4-Dichlorobenzoate degradation	PRDX6,DDHD1,ALOXE3,PPME1,AADAC
1- and 2-Methylnaphthalene degradation	ADH1B,ADH7,ADH4,ACAD8,MYST4,DHRS7,ADH5,ACADSB,ESCO2,DHRSX,SH3GLB1,DHRS2,DHRS3,DHRS1,NAA20,NAA10,ACADVL,ESCO1,MYST3,ACAD9,ADH6,ADH1A,ADH1C,PNPLA3,DBT,ADHFE1
Tetrachloroethene degradation	AKR1B10,HSD17B12,EPHX2,RDH13,RDH12,HSD3B7,RDH14,RDH11
Nitrobenzene degradation	PRMT1,PRMT6,METTL6,PRMT3,PRMT2,LCMT2,ALOXE3,CARM1,LCMT1,PRMT5,METTL2B,PRMT8,HEMK1,HEMK1,WBSCR22,PRMT7,LCMT2
Fluorene degradation	ECH1,ALOXE3
Carbazole degradation	ALOXE3
Glyoxylate and dicarboxylate metabolism	GRHPR,HAO1,MTHFD2,MDH2,MDH1,AFMID,ACO1,MTHFD1L,ACO2,MTHFD1,HAO2,HYI,CS
Benzoate degradation via CoA ligation	ACYP1,MYST4,DHRS7,ECHS1,ESCO2,DHRSX,ITGB1BP3,SH3GLB1,FN3K,ACAT1,DHRS2,DHRS3,ACOT9,DHRS1,NAA20,EHHADH,NAA10,DYRK4,ESCO1,MYST3,C9orf95,HADHA,ACYP2,GCDH,ACAT2,SHPK,EIF2AK3,PNPLA3,DBT,ACOT11
Propanoate metabolism	ALDH9A1,LDHA,SLC27A2,PCCB,ECHS1,PCCA,MCEE,ACACA,ACAT1,ACACB,SUCLG1,ALDH6A1,LDHAL6B,ACAD10,ABAT,EHHADH,ALDH1B1,SLC27A3,ACAD11,ACADM,LDHB,ALDH1A3,ACADL,ALDH7A1,MUT,DHCR24,ALDH3A2,HADHA,ACSS2,ACSS1,ALDH3A1,SUCLA2,ACAT2,ALDH2,MLYCD,SUCLG2,LDHC,LDHAL6A
Ethylbenzene degradation	SLC27A2,MYST4,DHRS7,ESCO2,DHRSX,SH3GLB1,DHRS2,DHRS3,DHRS1,NAA20,NAA10,SLC27A3,ESCO1,MYST3,PNPLA3,DBT
Styrene degradation	FAH,ALOXE3,HGD,GSTZ1
Butanoate metabolism	PRDX6,ALDH9A1,HMGCS2,ECHS1,ILVBL,AKR1B10,DDHD1,PDHA2,HSD17B12,PDHB,HSD17B10,GAD2,ACAT1,L2HGDH,BDH1,OXCT1,ACSM1,RDH13,ABAT,ALDH5A1,HMGCS1,HSD17B4,RDH12,GAD1,EHHADH,ALDH1B1,HADH,ALDH1A3,HSD3B7,OXCT2,ALDH7A1,ALDH3A2,PPME1,AADAC,ACADS,HADHA,PDHA1,ALDH3A1,HMGCL,ACAT2,ALDH2,AACS,RDH14,RDH11
C5-Branched dibasic acid metabolism	ILVBL,SUCLA2
One carbon pool by folate	AMT,SHMT2,ATIC,MTHFS,MTHFR,FTCD,ALDH1L1,MTHFS,MTHFD2,GART,MTR,SHMT1,MTFMT,MTHFD1L,TYMS,DHFR,SHMT1,DHFR,MTHFD1
Methane metabolism	PRDX6,SHMT2,ADH5,MTHFR,LPO,EPX,MPO,TPO,CAT,SHMT1,SHMT1
Carbon fixation	ME1,FBP2,PGK1,TKT,PKLR,TKTL1,GPT,ALDOC,ME3,RPE,TKTL2,PGK2,GPT2,RPIA,FBP1,GOT1,ALDOA,MDH2,TPI1,MDH1,ALDOB,PKM2,GOT2
Reductive carboxylate cycle (CO2 fixation)	ACLY,ACSS2,MDH2,MDH1,ACSS1,SUCLA2,ACO1,FH,IDH1,IDH2,ACO2
Thiamine metabolism	MTMR2,MTMR1,PHPT1,MTMR6,THTPA,TPK1
Riboflavin metabolism	ACP5,RFK,FLAD1,MTMR2,ENPP2,ACPT,MTMR1,PHPT1,ACPP,ENPP3,TYR,ENPP1,ACP2,ACP1,ACP6,MTMR6
Vitamin B6 metabolism	MTMR2,PDXK,MTMR1,AOX1,PHPT1,PSAT1,PNPO,MTMR6
Nicotinate and nicotinamide metabolism	NT5C,PNP,NT5C2,NT5C1B,ITGB1BP3,FN3K,NT5E,MTMR2,VNN3,ENPP2,NMNAT3,VNN2,NT5C1A,MTMR1,SIRT1,AOX1,PHPT1,NUDT12,NAAA,DYRK4,SIRT2,CD38,NNT,ENPP3,NT5C3,NAMPT,C9orf95,NMNAT2,NNMT,QPRT,NT5M,SIRT7,ENPP1,NADSYN1,SIRT5,SHPK,EIF2AK3,NTAN1,SIRT5,NMNAT1,MTMR6,NADK,BST1,BCO2
Pantothenate and CoA biosynthesis	PANK4,ILVBL,VNN3,ENPP2,VNN2,COASY,DPYD,SIRT1,PANK3,NAAA,BCAT1,DPYS,PPCDC,SIRT2,UPB1,ENPP3,BCAT2,SIRT7,PANK2,ENPP1,SIRT5,PANK3,NTAN1,SIRT5,PPCS,PANK1
Biotin metabolism	SPCS1,SPCS3,PRSS16,OTUB2,HLCS,OTUB1,COPS5,BTD
Folate biosynthesis	RAD54B,ALPI,DHX58,MOV10L1,ALPL,QDPR,GGH,GCH1,ATP13A2,DDX23,IFIH1,SNRNP200,ALPP,SMARCA2,SPR,ALPPL2,FPGS,DDX18,NUDT8,SETX,ERCC3,DDX41,ASCC3,ERCC2,FBXO18,PTS,DDX54,RUVBL2,DDX50,NUDT5,SMARCA5,DDX52,DHFR,EP400,RAD54L,DHFR,DDX56,DDX47,RAD54B
Atrazine degradation	APOBEC1,ADAR,APOBEC3A,APOBEC3C,APOBEC2,APOBEC3F,APOBEC3G
Retinol metabolism	ALDH1A1,RDH5,BCMO1,ALDH1A2
Porphyrin and chlorophyll metabolism	ALAD,MMAB,UROD,HMBS,FTMT,UGT2B15,UGT2B10,HCCS,UGT2A1,GUSB,HMOX2,UGT2B4,UGT2B11,FECH,CPOX,BLVRA,EPRS,UROS,BLVRB,PPOX,HMOX1,FTH1,UGT1A1,CP,UGT2B17,EARS2,FTH1,UGT2B28,UGT2B7
Terpenoid biosynthesis	IDI2,SQLE,IDI1,FDPS,IDI2,FDFT1,GGPS1
Monoterpenoid biosynthesis	CYP2C19,CYP2C9
Limonene and pinene degradation	ALDH9A1,SLC27A2,MYST4,DHRS7,ECHS1,ESCO2,DHRSX,SH3GLB1,DHRS2,CYP2C19,CYP2C9,DHRS3,ACOT9,DHRS1,NAA20,EHHADH,NAA10,ALDH1B1,SLC27A3,ALDH1A3,ESCO1,ALDH7A1,MYST3,ALDH3A2,HADHA,ALDH3A1,ALDH2,PNPLA3,DBT,ACOT11
Diterpenoid biosynthesis	EGLN3,EGLN1,P4HTM
Nitrogen metabolism	AMT,CTH,CA1,CA7,CA9,CA3,CA4,CA6,GLS,CA13,CPS1,CA2,CA5A,HAL,CA12,GLS2,GLUD2,CA11,ASNS,GLUD1,GLUL,CA14,CA8,CA5B
Sulfur metabolism	CHST11,CHST12,CHST13,PAPSS1,SULT2B1,BPNT1,SULT1A3,SULT1E1,SULT2A1,PAPSS2,SULT1A2,SUOX,SULT1A1,SULT1A4
Caprolactam degradation	SLC27A2,ECHS1,HSD17B10,VNN3,VNN2,SIRT1,HSD17B4,EHHADH,NAAA,HADH,SLC27A3,SIRT2,AKR1A1,SIRT7,HADHA,SIRT5,NTAN1,SIRT5
Stilbene, coumarine and lignin biosynthesis	PRDX6,LPO,EPX,GBA,MPO,TPO,TYR,GBA3,GBA
Alkaloid biosynthesis I	TAT,DDC,GOT1,TYR,GOT2
Alkaloid biosynthesis II	PRDX6,SLC27A2,MYST4,ESCO2,DDHD1,SH3GLB1,AOC2,AOC3,CES5A,NAA20,NAA10,SLC27A3,ESCO1,MYST3,PPME1,AADAC,CES1,LIPA,ABP1,PNPLA3,DBT
Aminoacyl-tRNA biosynthesis	KARS,FARSA,QARS,MARS2,YARS,CARS,AARS,PARS2,GARS,HARS2,LARS,IARS,NARS,FARSB,TARS,FARS2,WARS,EPRS,DARS,YARS2,CARS2,VARS,WARS2,LARS2,HARS,SARS,MTFMT,EARS2,MARS,DARS2,RARS,SARS2
Metabolism of xenobiotics by cytochrome P450	ADH1B,ADH7,ADH4,CYP2B6,CYP1A2,GSTM3,CYP2E1,CYP1A1,GSTM5,AKR1C3,ADH5,MGST2,ALDH3B2,EPHX1,GSTA2,CYP2S1,GSTA3,CYP3A7,UGT2B15,CYP1B1,GSTO1,MGST3,UGT2B10,GSTO2,UGT2A1,GSTT1,GSTM2,CYP2C19,CYP2C9,UGT2B4,GSTM1,CYP3A43,UGT2B11,GSTM4,MGST1,GSTK1,GSTA1,ALDH1A3,AKR1C1,GSTA4,CYP2C18,GSTP1,ALDH3B1,ALDH3A1,UGT1A1,CYP2F1,AKR1C4,AKR1C2,CYP3A5,UGT2B17,ADH6,DHDH,GSTA5,UGT2B28,UGT2B7,ADH1A,GSTT2,ADH1C,GSTZ1,CYP2C8,A…
Glycan structures - biosynthesis 1	B3GNT1,CHST2,CHST11,GALNTL1,XYLT1,ALG2,GALNT12,HS3ST3B1,HS2ST1,MGAT2,MAN1A1,CHST1,ST6GALNAC1,CHSY1,HS3ST2,MAN2A2,CHST7,EXTL1,CHST3,GALNT3,HS6ST3,B3GNT2,MGAT4A,MAN1C1,ST6GAL1,CHST12,CHSY3,NDST1,C1GALT1,CHST4,ALG6,GALNT5,B4GALT1,MGAT3,A4GNT,MAN1B1,B3GALT6,CHST15,CHST13,GALNT9,B4GALT3,B3GNT6,EXTL2,EXT2,ST3GAL2,B4GALT5,RPN2,ST3GAL1,B3GAT1,HS6ST2,GALNTL6,ALG14,GALNTL2,MAN2A1,MAN1A2,CHST14,B4GALT7,HS3S…
Glycan structures - biosynthesis 2	FUT7,ST6GALNAC4,PIGG,B3GNT1,B4GALT4,UGGT1,FUT9,B3GNT3,FUT1,A4GALT,ST6GALNAC6,PIGA,B4GALNT4,ST3GAL6,PIGN,B4GALNT1,FUT3,B3GNT2,PIGK,PIGC,UGGT2,PIGX,PIGU,PIGV,B4GALT1,ST6GALNAC5,UGCG,B4GALT3,ST6GALNAC3,B3GNT4,ST3GAL2,ST3GAL1,FUT4,OGT,ST8SIA1,ST3GAL5,B3GALNT1,PIGT,PIGS,ST8SIA5,PIGF,STT3B,GBGT1,PIGL,B4GALNT3,PIGZ,B3GALT2,GCNT2,PIGO,B3GALT4,PIGM,PIGH,FUT4,FUT2,B4GALT6,ST3GAL4,UGCG,ST3GAL3,PIGB,FUT5,FUT…
Glycan structures - degradation	FUCA2,MAN2C1,ENGASE,SGSH,HPSE,NAGLU,HEXB,HYAL1,HYAL2,IDUA,SPAM1,ARSB,MAN2B2,NEU3,AGA,GUSB,GALNS,GBA,GNS,MAN2B1,FUCA1,GLB1,IDS,MANBA,HPSE2,NEU1,NEU2,LCT,NEU4,MAN2C1,HEXA,HPSE2,HPSE2,HEXA,GBA
Cell Communication	SPP1,KRT2,COMP,DSG3,VTN,DSG1,KRT17,COL4A1,KRT39,KRT33B,PRPH,DSC3,KRT31,KRT32,KRT73,LAMB4,KRT12,KRT35,GJA1,KRT1,LMNB1,DSC2,CHAD,KRT10,GJC2,COL17A1,ACTC1,GJA3,ITGA6,KRT82,TNC,COL4A6,TNN,THBS1,THBS3,COL1A1,KRT85,GJB5,LAMA2,LAMC3,FN1,COL5A1,THBS4,COL6A3,COL5A3,LAMA1,KRT84,KRT86,GJD2,GJA4,KRT34,GJB1,GJA10,KRT77,GJB4,THBS2,COL11A2,KRT18,DSG4,COL2A1,KRT7,DSG2,COL6A2,KRT5,LAMA3,LAMB2,VWF,COL3A1,GJD3,COL5…
Neurodegenerative Disorders	CASP1,PSEN1,CASP7,SNCA,PSEN2,APLP1,MAPT,PARK2,CASP3,ATN1,BCL2,APBA1,NEFH,BAD,PINK1,NGFR,PARK7,APP,SOD1,GRB2,CREBBP,ALS2,PRNP,GFAP,BCL2L1,EP300,HTT,UCHL1,GAPDH,FBXW7,GAPDH,GAPDH,CASP8,HSPA5,BAX,APOE,CASP6,NGFR,PRNP
Ribosome	UBA52,RPS20,RPL37,RPS27L,RPL41,RPS4X,RPL3,RPS28,RPS29,RPL41,RPL8,RPL35,RPL4,RPS21,RPL32,RSL24D1,RPS24,RPS4Y1,RPL17,RPL39,RPL10L,RPS27A,MRPL13,RPL18A,RPS2,RPLP1,RPS3A,RPL41,RPS15A,RPL17,RPS5,RPL38,RPL19,RPS2,RPL21,RPS14,RPL15,FAU,RPS16,RPL30,RPL23,RPS10,RPS15,RPL36,RPL12,RPS6,RPL13,RPL9,RPL23A,RPL29,RPL36A,RPS17,RPS11,RPL37A,RPLP2,RPL34,RPS19,RPL36AL,RPS13,RPS26,RPSA,RPL31,RPL24,RPL26,RPL17,RPS2,R…
RNA polymerase	POLR2G,POLR2E,POLR2I,ZNRD1,POLR3B,POLR2C,POLR1B,POLR2A,POLR3G,POLR2K,POLR2H,POLR2F,POLR3A,POLR2L,POLR3F,POLR1D,POLR1A,POLR1C,POLR3GL,POLR3C,POLR2B,POLR3B,POLR3K,POLR2J,POLR3H,POLR2D
Basal transcription factors	TAF10,TAF4,STON1,GTF2F1,GTF2E2,TAF5,TAF11,TAF2,TAF1,TAF7L,TAF5L,GTF2H3,TAF4B,TAF7,GTF2E1,GTF2B,GTF2H4,TBPL1,TAF6,GTF2A2,TBPL2,TAF12,GTF2H1,TBP,TAF1L,TAF9B,GTF2A1,GTF2A1,GTF2H2,TAF13,GTF2I,GTF2IRD1,TAF9,GTF2F2,TAF6L
DNA polymerase	POLD3,POLE3,POLK,POLE2,POLA2,REV3L,POLQ,POLD1,POLD2,POLG2,POLI,REV1,POLE4,PAPD7,RFC5,POLL,POLD4,POLE,PRIM1,POLA1,POLM,POLB,PRIM2,POLH,POLG
Proteasome	PSMD1,PSMD3,PSMB6,PSMD8,PSMC5,PSMB3,PSMB4,PSMA1,PSMD13,PSMD6,PSMC6,PSMC4,PSMB7,PSMA7,PSMC3,PSMA4,PSMA2,PSMB1,PSMC1,PSMB5,PSMC2,PSMD7,PSMA6,PSMB2,PSMA5,PSMD4,PSMD2,PSMA3,PSMD14,PSMD12,PSMD11
Protein export	SEC11A,SEC11C,SEC61A2,OXA1L,SRP54,SRP72,SRPR,SRP9,SRP68,SEC61A1,SRP14,SRP19,SRP9
PPAR signaling pathway	APOA4,GK,CYP7A1,CYP4A11,PCK1,ANGPTL4,ACSL5,SLC27A2,ACSL6,ME1,RXRG,FABP7,SLC27A6,APOC3,PCK2,DBI,ADIPOQ,MMP1,APOA1,GK2,PPARA,PLIN1,CPT1C,CD36,PPARG,LPL,APOA2,UCP1,ACSL4,FABP2,SLC27A5,SLC27A1,FABP1,RXRB,FABP4,HMGCS1,ACSL1,HSD17B4,FABP5,OLR1,NR1H3,PLTP,CPT1B,ACOX2,ACADM,CYP8B1,AQP7,PDPK1,ACOX1,ACADL,SCP2,ACOX3,FADS2,CPT1A,CYP27A1,FABP6,UBC,SCD,RXRA,ACAA1,ACSL3,SLC27A4,FABP3,PPARD,ILK,PPARA,CPT2,CYP4A…
MAPK signaling pathway	FGF9,CACNB1,MAPK3,PLA2G1B,DUSP2,CACNA1S,FGFR3,IL1A,FGF4,PDGFB,FASLG,DUSP5,CASP1,NGF,JUND,CASP10,CRKL,FGF13,CACNG3,CASP7,GADD45G,CACNA2D4,IL1R2,MAP3K3,HRAS,FGF5,FGF3,DUSP8,IKBKG,RAC3,FGF8,MAPK11,FLNC,CACNB2,NFKB2,PDGFRA,NFATC4,PTPN5,GADD45A,TGFBR2,FGF18,DUSP14,MAP4K1,NTF3,RASGRP2,MAPT,RPS6KA4,GADD45B,NF1,RAPGEF2,MAP2K5,CACNA1C,CACNB4,CACNA1I,MAPK10,IL1B,PPM1A,RASGRP4,TGFB2,MAPK8,CASP4,CASP3,RASGRP…
Calcium signaling pathway	CCKAR,CCKBR,ADRA1D,TACR3,CACNA1S,AVPR1B,HRH1,AVPR1A,ADRB3,ADRB2,DRD1,ITPKA,OXTR,TRHR,CHRM3,P2RX5,HTR6,SLC8A1,GRM1,P2RX1,PHKA2,PHKG2,ITPR3,HTR5A,SPHK1,HTR7,GNA15,PDGFRA,PTAFR,PHKB,PLCD1,EDNRB,CALML6,MYLK2,TACR2,PLCZ1,ADRB1,RYR2,P2RX6,CACNA1C,ERBB3,TNNC1,CACNA1I,GNAS,MYLK4,MYLK3,TTN,GNAL,CAMK2A,CAMK2D,P2RX3,GRM5,HTR2C,PPP3CC,PPP3R2,PRKACG,PTGER1,ADORA2B,PLN,SLC8A2,TNNC2,EDNRA,PPID,PDE1A,ADCY1,ADORA…
Cytokine-cytokine receptor interaction	LTA,IL2RG,FLT3LG,IL8,IL12A,IL12B,IL3,CXCL1,IL13,CXCR2,IFNG,IL9,KITLG,LTBR,TNFRSF8,CSF2,IFNA4,TNFSF9,GDF5,IL1A,INHBB,PRL,PDGFB,FASLG,PPBP,CSF3,IL5,LIF,EPO,TNFRSF17,CCL16,TNFSF15,IL1R2,CXCR6,IFNA1,IFNA5,IL17A,CCR6,IL17RA,CCL19,CCL11,TNFSF13,IFNA16,CCL21,IL24,IL5RA,CCL1,IFNW1,VEGFA,BMP2,IFNA8,IL4,PDGFRA,CCL20,CCL4,CXCL2,CXCL9,VEGFB,CX3CR1,PF4,TNFRSF11B,TGFBR2,MPL,IL18,TNFRSF9,IL2,CXCL3,CXCL5,IFNB1,I…
Phosphatidylinositol signaling system	ITPKA,PIK3C2G,INPP1,PIK3CG,PIP4K2A,ITPR3,PLCD1,PIK3CA,CALML6,PLCZ1,INPP5E,OCRL,PIK3R1,ITGB1BP3,PIP4K2C,FN3K,PIKFYVE,PIK3C2A,DGKE,CALML3,PIK3CB,DGKI,INPP5D,PLCG1,PIK3R5,PIP5K1C,CALM1,PLCB2,IMPA2,PIK3R2,PLCD3,PLCG2,PLCB1,SYNJ2,DYRK4,INPP5B,PRKCB,PIK3C3,CALM2,INPP4A,DGKD,CDS2,PLCB4,SYNJ1,C9orf95,PIK3C2B,PTEN,DGKZ,ITPR2,CALM3,INPP5J,PIK3CD,INPP5A,PLCB3,INPPL1,DGKA,ITPKB,PI4KA,INPP4B,PRKCA,PIP5K1B,PIK…
Neuroactive ligand-receptor interaction	CCKAR,TSPO,CCKBR,GCGR,P2RY2,OPRD1,DEFA6,THRA,FPR1,GHRHR,TACR3,PTH1R,AVPR1B,EDN2,EDN3,FSHR,GIP,HRH1,HTR1E,NPY,POMC,PRL,PTGER2,AVPR1A,C5AR1,OPRM1,P2RY14,ADRB3,ADRB2,TAC1,DRD1,GLRA2,MLN,OXTR,OPRL1,TRHR,CHRM3,GABRG2,TAC3,SST,P2RX5,P2RY11,P2RY6,HTR6,GABRE,GABRA5,GABRP,GABRB1,GRIA2,GRM1,GLRB,FSHB,GHRH,PTH,NPY2R,P2RX1,SCTR,F2RL2,VIP,HTR5A,CNR2,HTR7,DRD2,CNR1,CRH,PTAFR,ADORA1,NTS,EDNRB,GNRH1,TACR2,AVP,GZ…
Cell cycle	CDC25C,HDAC2,ANAPC5,GADD45G,SMAD2,ORC1,CDK2,MAD2L2,SKP2,CCNB1,CHEK1,CDC14B,ORC6,CCNA2,CDKN2B,CDC23,YWHAQ,SMAD4,PKMYT1,TFDP1,GADD45A,HDAC1,CDK4,CDKN1C,E2F4,GADD45B,CDK6,CDC14A,CCNB3,TGFB2,CUL1,PCNA,ANAPC4,ESPL1,CDC25B,SKP1,MCM3,CDK7,CCNB2,RBL1,SMC1A,YWHAH,CDKN1B,CCNE1,WEE1,ATR,CHEK2,CCNH,SMC1B,CDK1,PTTG1,ATM,CDKN1A,CDC16,CCND2,CDC6,RB1,ORC3,FZR1,CCNA1,BUB3,ABL1,ORC5,CDKN2D,ANAPC1,CDC25A,MCM7,MCM6,…
Ubiquitin mediated proteolysis	NEDD4,ANAPC5,UBE2D4,SKP2,CDC23,CUL2,UBE2C,UBE2D2,UBE2D1,CUL1,ANAPC4,UBE2E1,SKP1,TCEB2,NEDD4L,SMURF1,HERC1,CUL3,CDC16,WWP2,FZR1,HERC2,ANAPC1,CDC27,UBE2E3,RBX1,UBE2E2,ANAPC10,FBXW11,UBR5,CDC34,VHL,UBE2D3,CDC20,ANAPC2,UBA1,ANAPC11,TCEB1,FBXW7,ITCH,UBE2R2,BTRC,WWP1,ANAPC7,SMURF2
SNARE interactions in vesicular transport	VAMP4,USE1,VAMP1,VAMP7,VAMP2,STX10,VAMP3,STX4,SNAP29,STX11,BNIP1,SNAP25,STX3,VTI1A,STX16,SNAP47,TSNARE1,BET1L,STX8,STX2,GOSR1,GOSR2,BET1,STX6,YKT6,STX12,VAMP5,STX18,STX7,STX6,SEC22B,STX5,STX19,STX17,VAMP8,SNAP23,VTI1B
Regulation of autophagy	IFNG,IFNA4,IFNA1,IFNA5,PRKAA1,ULK1,IFNA16,IFNA8,IFNA14,IFNA21,PIK3R4,ULK2,IFNA2,ATG12,IFNA7,IFNA10,IFNA17,PRKAA2,PIK3C3,ATG3,ATG5,GABARAPL1,IFNA6,IFNA13,GABARAP,BECN1,ATG7
mTOR signaling pathway	MAPK3,FIGF,MLST8,PIK3CG,PRKAA1,ULK1,VEGFA,VEGFB,PIK3CA,TSC2,PIK3R1,RPTOR,RPS6KA1,IGF1,ULK2,RPS6KA6,PIK3CB,EIF4E,PGF,PIK3R5,RHEB,EIF4E2,MTOR,TSC1,PIK3R2,RICTOR,RPS6,EIF4EBP1,MAPK1,VEGFC,PRKAA2,RPS6KA3,PDPK1,RPS6KB1,AKT3,STRADA,STK11,PIK3CD,DDIT4,AKT1,RPS6KB2,BRAF,PIK3CA,HIF1A,CAB39,AKT2,RHEB,EIF4B,RPS6KA2,PIK3R3,HIF1A
Apoptosis	IL3,IL1A,FASLG,NGF,CASP10,CASP7,PIK3CG,IKBKG,NFKB2,NFKBIA,MYD88,PIK3CA,FADD,IL1B,BIRC3,PIK3R1,DFFB,IRAK4,CASP3,PPP3CC,BCL2,PPP3R2,PRKACG,CHUK,TNFRSF10D,ENDOG,PIK3CB,TNF,FAS,PIK3R5,TNFRSF1A,PRKAR1A,PPP3R1,CASP9,CAPN2,XIAP,ATM,IRAK3,BAD,PIK3R2,CFLAR,MAP3K14,CHP,NTRK1,AIFM1,PRKAR2B,PPP3CA,CYCS,IRAK2,TRADD,TNFSF10,IL1RAP,DFFA,PRKACB,AKT3,PPP3CB,CAPN1,RELA,BCL2L1,PIK3CD,RIPK1,PRKAR1B,TNFRSF10B,TRAF2,I…
Wnt signaling pathway	MMP7,PSEN1,LRP5,CXXC4,SMAD2,FZD5,WNT4,WNT6,FZD10,DKK1,FZD3,RAC3,ROCK2,WNT7A,CSNK2B,SMAD4,NFATC4,CSNK2A2,WNT10B,FZD1,SOX17,VANGL2,PPP2CA,WNT11,DVL2,WNT10A,MAPK10,FRAT1,MAPK8,FRAT2,FZD2,CAMK2A,CAMK2D,PPP2R2A,CUL1,PPP3CC,WNT9A,PPP3R2,AXIN2,PRKACG,APC,DKK4,SKP1,FZD7,MYC,CTBP1,NLK,DKK2,SFRP1,NKD2,RHOA,WNT1,CER1,WNT2B,WNT16,RUVBL1,SFRP5,PPP3R1,FOSL1,WIF1,FZD8,WNT5B,ROCK1,WNT9B,WNT3A,CAMK2B,PLCB2,DAAM2,…
Dorso-ventral axis formation	MAPK3,NOTCH3,FMN2,RHBDL1,MAP2K1,RAF1,ETV7,SOS2,ETS1,ERBB4,PIWIL1,MAPK1,NOTCH4,GRB2,ERBB2,PIWIL3,NOTCH2,EGFR,NOTCH1,ETV6,KRAS,CPEB1,BRAF,PIWIL2,ETS2,RHBDL3,PIWIL4,SOS1
Notch signaling pathway	PSEN1,HDAC2,NOTCH3,PSEN2,DTX3,HES5,HDAC1,APH1A,DVL2,DLL3,NCOR2,LFNG,PTCRA,DTX2,CTBP1,RBPJL,HES1,NUMBL,DTX1,DLL1,DVL3,ADAM17,MAML2,JAG2,NOTCH4,SNW1,CREBBP,KAT2A,RBPJ,NOTCH2,NOTCH1,CTBP2,DLL4,NCSTN,EP300,MFNG,DTX3L,DTX4,PSENEN,RFNG,MAML3,MAML1,CIR1,NUMB,NUMB,JAG1,DVL1
Hedgehog signaling pathway	GLI3,WNT4,WNT6,GAS1,BMP4,WNT7A,BMP2,WNT10B,WNT11,GLI2,WNT10A,CSNK1G3,WNT9A,PRKACG,SHH,WNT1,WNT2B,WNT16,BMP6,BMP5,WNT5B,WNT9B,WNT3A,PRKX,SUFU,WNT8B,SMO,GSK3B,WNT3,STK36,BMP8A,BMP7,CSNK1E,FBXW11,PRKACB,PTCH1,HHIP,WNT7B,CSNK1A1L,DHH,CSNK1A1,RAB23,WNT2,PRKY,WNT8A,PTCH2,PRKACA,CSNK1D,GLI1,WNT5A,BTRC,CSNK1G1,CSNK1G2,ZIC2,IHH,LRP2,BMP8B,CSNK1A1,
TGF-beta signaling pathway	IFNG,MAPK3,GDF5,COMP,INHBB,FST,SMAD2,ROCK2,BMP4,CDKN2B,BMP2,SMAD4,ID3,TFDP1,TGFBR2,PPP2CA,E2F4,AMH,SMAD9,TGFB2,CUL1,SMAD6,THBS1,CHRD,SMAD5,THBS3,SKP1,ACVR2B,ID2,SMURF1,MYC,RBL1,THBS4,TNF,RHOA,NOG,BMP6,BMP5,ROCK1,NODAL,THBS2,MAPK1,ACVR1B,E2F5,GDF7,CREBBP,RPS6KB1,SMAD7,ACVR2A,ACVR1,BMPR2,BMP8A,BMP7,RBX1,ZFYVE16,PPP2CB,GDF6,TGFBR1,ID1,RBL2,EP300,ID4,LEFTY2,BMPR1A,ZFYVE9,RPS6KB2,ACVR1C,INHBA,ACVRL1,T…
Axon guidance	MAPK3,EPHB3,PLXNB2,FES,ROBO2,ROBO1,RHOD,PAK4,ARHGEF12,SEMA7A,SEMA4F,EFNB3,SEMA5A,SLIT2,PAK7,SEMA3F,UNC5A,HRAS,RAC3,ABLIM3,ROCK2,SEMA3G,GNAI3,EPHA7,GNAI2,NFATC4,SEMA3B,EPHA1,NGEF,EPHB1,EPHA3,RND1,NRP1,MET,GNAI1,LRRC4C,EFNB1,EFNB2,PPP3CC,PPP3R2,SEMA6A,NTN3,DCC,EPHA2,CFL2,NTN4,SEMA3D,SRGAP1,SEMA5B,ABLIM2,UNC5D,RHOA,SEMA3A,SEMA3C,PPP3R1,EPHA8,EFNA5,DPYSL5,ROCK1,EPHA4,NFAT5,EPHB6,UNC5C,FYN,PTK2,CHP,SE…
VEGF signaling pathway	MAPK3,PLA2G1B,SHC2,PIK3CG,HRAS,RAC3,MAPK11,SPHK1,VEGFA,NFATC4,PIK3CA,SH2D2A,PIK3R1,MAP2K1,PPP3CC,PLA2G3,PPP3R2,RAF1,PLA2G6,MAPK13,PLA2G2D,SRC,MAPKAPK3,PIK3CB,PLCG1,PLA2G2E,PIK3R5,PPP3R1,PLA2G2F,PLA2G5,CASP9,PLA2G12B,BAD,PIK3R2,NFAT5,PLA2G12A,PTK2,CHP,PLCG2,RAC1,MAPK1,MAPK12,PPP3CA,NFATC3,PXN,PRKCB,MAP2K2,PLA2G2A,CDC42,KDR,MAPK14,NRAS,PLA2G4A,AKT3,PPP3CB,KRAS,RAC2,PIK3CD,HSPB1,AKT1,SPHK2,PRKCA,NFA…
Focal adhesion	SPP1,MAPK3,COMP,PDGFB,VTN,CRKL,FIGF,COL4A1,PAK4,SHC2,PAK7,PIK3CG,HRAS,RAC3,PPP1R12A,FLNC,ROCK2,LAMB4,VEGFA,CAV1,PDGFRA,VEGFB,PPP1CC,PIK3CA,MYLK2,CHAD,CAV3,ITGA9,VAV1,ACTC1,MAPK10,BIRC3,MYLK4,RAPGEF1,MYLK3,PIK3R1,MET,ITGA6,TTN,MAPK8,TNC,MAP2K1,COL4A6,BCL2,TNN,ITGA10,RAF1,DOCK1,IGF1,THBS1,THBS3,ITGA8,COL1A1,ELK1,PPP1CA,RAP1A,FLNA,SRC,LAMA2,LAMC3,FN1,COL5A1,THBS4,CAV2,ITGB3,COL6A3,COL5A3,PIK3CB,RHOA…
ECM-receptor interaction	SPP1,GP9,GP1BA,SDC2,VTN,COL4A1,SV2B,LAMB4,GP5,DAG1,CHAD,ITGA9,CD36,ITGA6,TNC,COL4A6,TNN,ITGA10,SDC3,THBS1,THBS3,ITGA8,COL1A1,LAMA2,LAMC3,FN1,COL5A1,THBS4,ITGB3,SDC1,COL6A3,COL5A3,ITGA3,LAMA1,AGRN,GP1BB,THBS2,COL11A2,COL2A1,ITGA2B,COL6A2,LAMA3,ITGA11,ITGAV,LAMB2,VWF,ITGA4,COL3A1,COL5A2,CD47,ITGB6,LAMA5,COL6A1,ITGA2,TNXB,COL1A2,LAMB3,CD44,ITGA5,FNDC3A,COL4A2,SV2A,IBSP,FNDC1,COL11A1,FNDC5,ITGA7,ITGB…
Cell adhesion molecules (CAMs)	CD80,SDC2,HLA-DOB,ICOSLG,NRCAM,NLGN2,CLDN11,SIGLEC1,CD58,CLDN15,PTPRM,ICOS,SELP,CDH5,CD276,HLA-B,SELE,CD8A,MADCAM1,VCAM1,GLG1,ITGA9,ITGA6,CNTN1,NEGR1,CDH15,JAM3,SDC3,PDCD1,CLDN8,CD86,ITGA8,PVR,ITGAM,ESAM,ITGAL,HLA-A,CLDN23,CDH3,SDC1,CTLA4,CLDN16,CLDN17,PTPRF,PVRL3,CLDN9,PVRL1,HLA-DPA1,HLA-DMB,CADM3,NRXN3,CADM1,NRXN2,CD34,ITGB2,PECAM1,HLA-DQA1,NEO1,CD8B,CNTNAP1,HLA-DQB1,ICAM2,ITGAV,NLGN3,CLDN1,ITG…
Adherens junction	MAPK3,WAS,SMAD2,SSX2IP,RAC3,SNAI1,PTPRM,PTPN6,CSNK2B,WASF1,SMAD4,TGFBR2,CSNK2A2,ACTC1,BAIAP2,PARD3,MET,WASL,CTNND1,CTNNA2,YES1,SRC,LMO7,NLK,FER,RHOA,FGFR1,ACTN4,PTPRF,PVRL3,PTPRJ,PVRL1,SNAI2,FYN,RAC1,PTPN1,IQGAP1,MAPK1,PTPRB,ACVR1B,CTNNA1,ERBB2,CREBBP,CDH1,INSR,CDC42,WASF2,CTNNB1,EGFR,PVRL4,TGFBR1,ACTN2,ACTN1,ACTG1,TCF7L1,EP300,RAC2,ACTB,LEF1,ACP1,ACVR1C,TCF7,TCF7L2,MLLT4,WASF3,IGF1R,VCL,CSNK2A1,…
Tight junction	HCLS1,MYH10,TJP3,CLDN11,HRAS,CLDN15,TJP2,CSNK2B,GNAI3,GNAI2,CSNK2A2,CDK4,PPP2CA,PARD6A,ACTC1,RAB3B,PPP2R3B,PARD3,GNAI1,PPP2R2A,CRB3,JAM3,RAB13,PRKCD,CLDN8,VAPA,CTNNA2,MPDZ,EPB41,CLDN23,YES1,SRC,EPB41L3,CSDA,RHOA,CLDN16,CLDN17,ACTN4,CLDN9,EXOC4,PRKCH,SPTAN1,PPP2R4,IGSF5,EPB41L1,CLDN1,ZAK,CTNNA1,PRKCB,MYH14,PPP2R1A,CDC42,MYH9,CTNNB1,INADL,PRKCI,PPP2R2C,EXOC3,MAGI3,EPB41L2,NRAS,ASH1L,PPP2CB,CASK,PRK…
Gap junction	MAPK3,PDGFB,DRD1,GUCY1A3,GRM1,HRAS,ITPR3,GNAI3,DRD2,GJA1,PDGFRA,TUBA4A,GNAI2,GUCY1B3,NPR2,ADRB1,TUBB4,MAP2K5,GUCY2F,GNAS,LPAR1,CSNK1G3,GNAI1,TUBA8,MAP2K1,MAP3K2,GRM5,HTR2C,MAPK7,PRKACG,RAF1,ADCY1,TUBB6,SRC,GNAQ,GJD2,SOS2,TUBB2B,TUBB1,CDK1,TUBA3C,PDGFD,PLCB2,PRKX,ADCY9,GUCY1B2,EGF,HTR2B,PLCB1,MAPK1,TUBB2C,ADCY4,GRB2,PRKCB,MAP2K2,PLCB4,CSNK1E,ADCY2,NRAS,PRKACB,EGFR,NPR1,KRAS,PDGFRB,TUBB3,ITPR2,CSNK…
Complement and coagulation cascades	C4BPA,C8G,F12,F11,THBD,C5AR1,C1QB,F5,F7,F3,PROS1,CFB,SERPINC1,PLAU,KNG1,C7,MASP1,C8A,C4BPB,CD55,PLG,CFD,SERPINF2,SERPINA5,A2M,PROC,KLKB1,CD59,FGB,CFI,CR1,F13A1,FGA,F10,CFH,SERPING1,C8B,C2,SERPINE1,F13B,VWF,CR2,C1S,PLAUR,C1QC,SERPIND1,C6,F2R,PLAT,C5,MBL2,CD46,CPB2,TFPI,F9,C1R,SERPINA1,BDKRB1,C3,C4A,FGG,C3AR1,C1QA,C9,F8,BDKRB2,F2,MASP2,CD59,C4B,BDKRB2
Antigen processing and presentation	LTA,TAP2,IFNA4,HLA-DOB,NFYA,IFI30,LGMN,RFXAP,IFNA1,IFNA5,IFNA16,IFNA8,PSME1,HLA-B,NFYB,CD8A,IFNA14,IFNA21,HSPA8,HLA-A,CTSS,HSPA9,IFNA2,HSPA1A,IFNA7,IFNA10,IFNA17,HLA-DPA1,HLA-DMB,TAP1,TAPBP,HLA-DQA1,CD8B,HLA-DQB1,CTSL1,PSME2,CD74,HLA-DPB1,HSP90AB1,HLA-G,PSME2,KLRC1,CALR,CREB1,HLA-F,HLA-DRA,CTSB,HSP90AA1,IFNA6,IFNA13,B2M,HLA-DRB1,KLRD1,CANX,PDIA3,KLRC2,HLA-DQA1,HSPA5,CD4,HLA-DOA,RFX5,KIR3DL3,KIR3D…
Toll-like receptor signaling pathway	IL8,IL12A,IL12B,CD80,IFNA4,TICAM1,PIK3CG,IFNA1,IFNA5,IKBKG,IFNA16,MAPK11,NFKB2,IFNA8,IRF3,CCL4,CXCL9,NFKBIA,MYD88,PIK3CA,FADD,TLR9,IFNB1,IFNA14,IFNA21,MAPK10,IL1B,PIK3R1,MAPK8,IRAK4,LBP,CD14,CD86,TLR4,MAPK13,CHUK,IFNA2,PIK3CB,TNF,TAB2,PIK3R5,IFNA7,IFNA10,IFNA17,IKBKE,ATM,TOLLIP,PIK3R2,RAC1,MAPK12,MAP2K6,CD40,MAPK9,MAPK14,AKT3,RELA,TBK1,TAB1,MAP2K3,CCL3,MAP2K4,CCL5,PIK3CD,TLR2,IRAK1,AKT1,IFNAR1,IF…
Jak-STAT signaling pathway	IL2RG,IL12A,IL12B,IL3,IL13,IFNG,IL9,CSF2,IFNA4,IRF9,PRL,CSF3,IL5,LIF,EPO,STAM2,SPRY2,PIK3CG,IFNA1,IFNA5,SOCS6,SOCS1,IFNA16,IL24,SPRED2,PTPN6,IL5RA,IFNW1,IFNA8,IL4,TYK2,STAT4,PIM1,MPL,PIK3CA,IL2,IFNB1,IFNA14,IL23A,PIAS4,IL22RA1,IFNA21,OSMR,GHR,IL22RA2,CNTFR,PIK3R1,LIFR,PIAS1,IL15,IL10,LEP,MYC,JAK1,IL21R,IFNA2,IL28RA,IL2RA,PIK3CB,OSM,IL26,IL20,PIK3R5,IFNA7,IFNA10,IFNA17,IL22,CRLF2,SOS2,SPRY4,STAM,I…
Hematopoietic cell lineage	FLT3LG,IL3,KITLG,GP9,THPO,ANPEP,CD1A,CD1B,CSF2,GP1BA,IL1A,CD1D,CSF3,IL5,CD3G,EPO,CD3E,IL1R2,CD7,CD5,IL5RA,GP5,IL4,FCGR1A,CD33,CD8A,CD9,CD36,IL1B,CD55,CD1C,ITGA6,CD14,CD37,ITGAM,ITGB3,IL2RA,TNF,CD1E,ITGA3,CD59,GP1BB,MME,CR1,CD34,CD8B,IL9R,ITGA2B,GYPA,ITGA4,CR2,FCER2,IL11,TPO,CD38,KIT,ITGA2,CD44,CD3D,ITGA5,FLT3,IL4R,HLA-DRA,CSF2RA,CD2,CSF3R,TFRC,DNTT,HLA-DRB1,CD22,CSF1R,IL11RA,CSF1,IL7R,IL7,EPOR,CD…
Natural killer cell mediated cytotoxicity	IFNG,MAPK3,GZMB,CSF2,IFNA4,FASLG,PRF1,SHC2,PIK3CG,HRAS,IFNA1,IFNA5,RAC3,IFNA16,PTPN6,IFNA8,NFATC4,HLA-B,PIK3CA,IFNB1,IFNA14,NCR1,IFNA21,VAV1,HCST,PIK3R1,CASP3,MAP2K1,PPP3CC,PPP3R2,CD247,CD244,RAF1,SH3BP2,ITGAL,HLA-A,NCR2,IFNA2,TNFRSF10D,ZAP70,PIK3CB,TNF,CD48,FAS,VAV3,PLCG1,PIK3R5,PPP3R1,IFNA7,IFNA10,IFNA17,SOS2,SHC3,LCP2,ULBP3,SH2D1B,VAV2,PIK3R2,SYK,NFAT5,FCGR3A,ITGB2,KLRK1,FYN,CHP,PLCG2,RAC1,ICA…
T cell receptor signaling pathway	IFNG,CSF2,IL5,CD3G,CD3E,NFKBIB,PAK4,PAK7,PIK3CG,HRAS,IKBKG,ICOS,PTPN6,NFKB2,IL4,NFATC4,NFKBIA,CD8A,PIK3CA,IL2,CDK4,VAV1,PIK3R1,PPP3CC,PPP3R2,CD247,PDCD1,BCL10,IL10,CHUK,ZAP70,PIK3CB,TNF,RHOA,CTLA4,VAV3,PLCG1,PIK3R5,PPP3R1,SOS2,LCP2,VAV2,PIK3R2,NFAT5,FYN,MAP3K14,CD8B,CHP,CBLB,MAP3K8,PPP3CA,PAK1,NFATC3,GRB2,NFKBIE,CBLC,CDC42,LCK,PDK1,NCK1,TEC,NRAS,AKT3,PRKCQ,PPP3CB,CD3D,CBL,KRAS,PAK6,GRAP2,PIK3CD,P…
B cell receptor signaling pathway	NFKBIB,PIK3CG,HRAS,IKBKG,RAC3,CD81,PTPN6,NFKB2,NFATC4,NFKBIA,PIK3CA,CD79B,VAV1,CD72,PIK3R1,RASGRP3,PPP3CC,PPP3R2,BTK,BCL10,CHUK,PIK3CB,INPP5D,VAV3,PIK3R5,PPP3R1,VAV2,PIK3R2,SYK,NFAT5,CHP,PLCG2,RAC1,PPP3CA,NFATC3,GSK3B,CR2,NFKBIE,IFITM1,PRKCB,NRAS,LYN,AKT3,PPP3CB,KRAS,RAC2,PIK3CD,AKT1,NFATC1,PIK3CA,CD22,IKBKB,MALT1,INPP5D,NFKB1,AKT2,CD79A,CARD11,CD19,FCGR2B,PIK3R3,BLNK,VAV2,JUN,CHP,NFATC2,FOS
Fc epsilon RI signaling pathway	IL3,IL13,MAPK3,FCER1A,PLA2G1B,CSF2,IL5,PIK3CG,HRAS,RAC3,MAPK11,IL4,PIK3CA,VAV1,MAPK10,PIK3R1,MAPK8,MAP2K1,PLA2G3,PRKCD,RAF1,BTK,PLA2G6,MAPK13,PLA2G2D,PIK3CB,TNF,INPP5D,VAV3,PLCG1,PLA2G2E,PIK3R5,SOS2,PLA2G2F,LCP2,PLA2G5,PLA2G12B,VAV2,PIK3R2,SYK,MS4A2,PLA2G12A,FYN,PLCG2,RAC1,GAB2,MAPK1,MAPK12,FCER1G,GRB2,PRKCB,MAP2K6,MAP2K2,PLA2G2A,PDK1,MAPK9,MAPK14,NRAS,LYN,PLA2G4A,AKT3,KRAS,MAP2K3,MAP2K4,RAC2,PIK…
Leukocyte transendothelial migration	IL8,PPBP,RAPGEF3,CLDN11,PIK3CG,CLDN15,MAPK11,ROCK2,GNAI3,CDH5,GNAI2,PF4,PIK3CA,MSN,CXCL13,VCAM1,VAV1,ACTC1,PIK3R1,GNAI1,JAM3,CLDN8,CTNND1,CTNNA2,ITGAM,ESAM,ITGAL,MAPK13,CLDN23,RAP1A,PIK3CB,RHOA,NOX3,CLDN16,CLDN17,VAV3,PLCG1,ACTN4,PIK3R5,CYBB,CLDN9,MMP9,ROCK1,RAP1B,VAV2,PIK3R2,ITGB2,PECAM1,PTK2,PLCG2,RAC1,MAPK12,CLDN1,ITGA4,CTNNA1,PXN,PRKCB,CDC42,RAPGEF4,NCF4,CTNNB1,TXK,BCAR1,CXCL14,MAPK14,EZR,PTK…
Circadian rhythm	PER2,CSNK1G3,CRY1,NPAS2,PER3,BHLHE40,BHLHE41,CLOCK,CYCS,PER1,CSNK1E,CSNK1A1L,CSNK1A1,NR1D1,CYCS,CSNK1D,CSNK1G1,CSNK1G2,NPAS2,CSNK1A1
Long-term potentiation	MAPK3,RAPGEF3,GRIA2,GRM1,HRAS,PPP1R12A,ITPR3,PPP1CC,CALML6,CACNA1C,CAMK2A,CAMK2D,MAP2K1,GRM5,PPP3CC,RPS6KA1,PPP3R2,PRKACG,RAF1,PPP1CA,RAP1A,ADCY1,RPS6KA6,CALML3,GNAQ,PPP3R1,CALM1,CAMK2B,PLCB2,RAP1B,PRKX,CHP,GRIN2A,PLCB1,MAPK1,PPP3CA,GRIN2C,GRIN2D,RPS6KA3,CREBBP,PRKCB,MAP2K2,CALM2,PLCB4,NRAS,PRKACB,ATF4,PPP3CB,KRAS,PPP1R1A,ITPR2,CALM3,EP300,GRIA1,CAMK2G,PLCB3,PRKCA,GRIN1,ITPR1,PRKY,CAMK4,ADCY8,PRK…
Long-term depression	MAPK3,PLA2G1B,GUCY1A3,GRIA2,GRM1,HRAS,ITPR3,GNAI3,CRH,GNAI2,GUCY1B3,NPR2,PPP2CA,GUCY2F,GNAS,GNAI1,MAP2K1,PPP2R2A,GRM5,PLA2G3,RAF1,IGF1,PLA2G6,PLA2G2D,C7orf16,GNAQ,PLA2G2E,PLA2G2F,PLA2G5,PLA2G12B,PLCB2,GRIA3,PLA2G12A,GUCY1B2,CRHR1,PLCB1,MAPK1,PRKCB,MAP2K2,RYR1,PLA2G2A,PPP2R1A,PLCB4,PPP2R2C,GRID2,NRAS,GNA12,NPR1,PPP2CB,LYN,PLA2G4A,CACNA1A,KRAS,ITPR2,GNA13,GRIA1,PLCB3,GUCY2C,PRKCA,ITPR1,PLA2G10,PRKG…
Olfactory transduction	CALML6,GUCA1A,GNAL,CAMK2A,CAMK2D,CNGB1,PRKACG,CLCA1,GUCA1C,CNGA3,CALML3,CLCA2,CALM1,CAMK2B,PRKX,CNGA4,ARRB2,GUCA1B,CALM2,PRKACB,CALM3,CAMK2G,CLCA4,PRKG2,PRKY,PRKACA,PDC,PRKG1,ADRBK2,ADCY3,PDE1C
Taste transduction	ITPR3,TAS1R3,KCNB1,TAS1R1,GNAS,PRKACG,GNG3,PDE1A,GNG13,TRPM5,TAS2R9,TAS2R16,TAS2R45,GNAT3,TAS2R40,PLCB2,ACCN1,SCNN1G,PRKX,SCNN1B,GNB1,ADCY4,PRKACB,CACNA1B,CACNA1A,ADCY6,TAS2R7,TAS2R8,TAS2R10,TAS1R2,TAS2R39,TAS2R42,TAS2R1,PRKY,SCNN1A,ADCY8,PRKACA,GNB3,TAS2R38,TAS2R41,GRM4,TAS2R4,TAS2R5,TAS2R3,TAS2R14,TAS2R13,PDE1A,TAS2R20,TAS2R46,TAS2R50,TAS2R43,TAS2R19,TAS2R31,TAS2R60,ADCY6,
Regulation of actin cytoskeleton	FGF9,MAPK3,FGFR3,FGF4,PDGFB,WAS,CRKL,FGF13,CHRM3,MYH10,PAK4,ARHGEF12,CYFIP1,SSH3,PAK7,PIK3CG,HRAS,FGF5,FGF3,RAC3,PPP1R12A,PIP4K2A,FGF8,ROCK2,PDGFRA,WASF1,CSK,PPP1CC,PIK3CA,MYLK2,FGF18,MSN,PFN2,ITGA9,VAV1,ACTC1,ARPC1A,MYLK4,BAIAP2,PFN3,MYLK3,PIK3R1,ARPC5L,ITGA6,TTN,WASL,PIP4K2C,MAP2K1,ITGA10,APC,RAF1,DOCK1,TMSB4Y,CD14,FGFR4,FGF6,ITGA8,ITGAM,PIKFYVE,ITGAL,CFL2,NCKAP1L,PPP1CA,MYL1,SSH1,FGF20,FN1,ITG…
Insulin signaling pathway	MAPK3,GCK,PCK1,CRKL,PFKP,SHC2,PIK3CG,HRAS,PPP1R3D,PRKAA1,SOCS6,SOCS1,PRKAB2,PHKA2,FBP2,PHKG2,PFKM,PCK2,PHKB,PPP1CC,GYS2,FASN,PIK3CA,CALML6,TSC2,PKLR,MAPK10,RAPGEF1,PIK3R1,RPTOR,MAPK8,MAP2K1,PYGM,PRKACG,RAF1,ACACA,FLOT1,ELK1,PPP1CA,PHKA1,G6PC,ACACB,CALML3,PIK3CB,EIF4E,PFKL,INPP5D,PTPRF,PIK3R5,PRKAR1A,CALM1,PYGL,RHEB,SOS2,EIF4E2,SHC3,PPP1R3C,MTOR,PYGB,BAD,FOXO1,TSC1,PIK3R2,MKNK1,SLC2A4,GYS1,PRKX,RP…
GnRH signaling pathway	HBEGF,MAPK3,PLA2G1B,CACNA1S,MMP14,MAP3K3,FSHB,HRAS,MAPK11,ITPR3,GNRH1,CALML6,PLD2,CACNA1C,CGA,MAPK10,GNAS,GNRH2,MAPK8,CAMK2A,CAMK2D,MAP2K1,MAP3K2,PLA2G3,MAPK7,LHB,PRKCD,PRKACG,RAF1,PLA2G6,MAPK13,ELK1,PLA2G2D,ADCY1,SRC,CALML3,GNAQ,PLA2G2E,CALM1,SOS2,PLA2G2F,PLA2G5,PLA2G12B,CAMK2B,PLCB2,PLD1,PLA2G12A,MAP3K4,PRKX,ADCY9,GNRHR,PLCB1,MAPK1,MAPK12,ADCY4,GRB2,PRKCB,MAP2K6,MAP2K2,PLA2G2A,CDC42,CALM2,PLCB4…
Adipocytokine signaling pathway	NPY,PCK1,POMC,ADIPOR1,CAMKK1,NFKBIB,ACSL5,ACSL6,RXRG,PRKAA1,PRKAB2,NFKB2,TYK2,PCK2,ADIPOQ,NFKBIA,PPARA,AGRP,CPT1C,CD36,MAPK10,MAPK8,LEP,JAK1,G6PC,ACACB,TNF,TNFRSF1B,ACSL4,TNFRSF1A,CAMKK2,MTOR,ADIPOR2,SLC2A4,RXRB,ACSL1,PRKAA2,CPT1B,IRS2,NFKBIE,IRS4,TRADD,STAT3,IRS1,SLC2A1,MAPK9,AKT3,PRKCQ,RELA,CPT1A,PTPN11,STK11,JAK3,TRAF2,AKT1,PPARGC1A,SOCS3,PRKAG1,RXRA,PRKAG3,IKBKB,NFKB1,AKT2,PRKAG2,ACSL3,JAK2,P…
Type II diabetes mellitus	MAPK3,GCK,PDX1,PIK3CG,SOCS6,SOCS1,ABCC8,ADIPOQ,PIK3CA,PKLR,CACNA1C,MAPK10,PIK3R1,MAPK8,PRKCD,SLC2A2,PIK3CB,TNF,KCNJ11,PIK3R5,MTOR,PIK3R2,SLC2A4,MAPK1,CACNA1E,IRS2,IRS4,INSR,IRS1,CACNA1D,MAPK9,SOCS2,CACNA1B,PRKCZ,CACNA1A,PIK3CD,MAFA,SOCS3,PKM2,PIK3CA,PRKCE,CACNA1G,IKBKB,CACNA1E,PIK3R3
Type I diabetes mellitus	LTA,IL12A,IL12B,CD80,IFNG,GZMB,IL1A,HLA-DOB,FASLG,PRF1,CPE,HLA-B,PTPRN,IL2,IL1B,CD86,HLA-A,GAD2,TNF,FAS,HLA-DPA1,HLA-DMB,HLA-DQA1,HLA-DQB1,GAD1,HLA-DPB1,ICA1,PTPRN2,HLA-G,HLA-F,HLA-DRA,HLA-DRB1,CD28,HLA-DQA1,HSPD1,HLA-DOA,HLA-E,HLA-C,HLA-C,HLA-DRB1,HLA-DQA1,HLA-DRB4,HLA-DRB4,HSPD1,HLA-DMA
Maturity onset diabetes of the young	GCK,PDX1,NR5A2,FOXA3,MNX1,IAPP,PKLR,HNF4A,HHEX,PAX4,FOXA2,SLC2A2,HNF1B,HNF4G,HES1,PAX6,NKX2-2,MAFA,NEUROG3,NKX6-1,HNF1A,ONECUT1,BHLHA15,NEUROD1
Alzheimer@#$%&s disease	PSEN1,CASP7,SNCA,PSEN2,MAPT,APH1A,CASP3,LRP1,LPL,A2M,MME,APBB1,APP,GSK3B,NAE1,IDE,BACE1,NCSTN,BACE2,PSENEN,GAPDH,GAPDH,GAPDH,APOE
Parkinson@#$%&s disease	SNCA,UBE2L3,PARK2,UBE2J2,UBB,PINK1,GPR37,PARK7,UBE2L6,SNCAIP,TH,UCHL1,UBE2G2,UBA1,CYP2D6,UBE2G2,SEPT5,UBB
Amyotrophic lateral sclerosis (ALS)	KARS,GPX1,BCL2,NEFH,BAD,SSR4,PPP3CA,SOD1,NEFM,ALS2,CAT,SLC1A2,CCS,BCL2L1,NEFL,BAX,TP53,NEFM
Huntington@#$%&s disease	CASP1,CALML6,CASP3,HAP1,PLEKHA8,CALML3,CALM1,HIP1,CLTCL1,IFT57,GRB2,CREBBP,NCOR1,CALM2,CLTB,CLTC,BDNF,CALM3,DCTN1,TGM2,EP300,HTT,CLTA,CBS,GAPDH,GAPDH,GAPDH,CASP8,TP53,CASP6,RASA1,UBE2K
Dentatorubropallidoluysian atrophy (DRPLA)	CASP1,CASP7,BAIAP2,CASP3,ATN1,WWP2,RERE,INSR,GAPDH,GAPDH,GAPDH,CASP8,MAGI2,ITCH,MAGI1,WWP1
Prion disease	APLP1,BCL2,NFE2L2,LAMA1,RPSA,PRNP,GFAP,HSPD1,HSPA5,LAMC1,LAMB1,PRNP,HSPD1
Epithelial cell signaling in Helicobacter pylori infection	IL8,CXCL1,HBEGF,CXCR2,ATP6AP1,ATP6V0A2,IKBKG,MAPK11,ATP6V1B1,NFKB2,CSK,ATP6V1F,NFKBIA,ATP6V1C1,ATP6V0A4,ATP6V0D1,MAPK10,ATP6V1G3,MET,MAPK8,CASP3,JAM3,MAPK13,CXCR1,SRC,CHUK,ATP6V1G2,PLCG1,ATP6V1D,ATP6V1B2,ATP6V1G1,ATP6V0C,MAP3K14,ADAM17,NOD1,PLCG2,RAC1,IGSF5,MAPK12,PAK1,ATP6V0D2,ATP6V0A1,CDC42,ATP6V1A,ATP6V0E1,MAPK9,MAPK14,EGFR,PTPRZ1,ATP6V1H,LYN,TCIRG1,RELA,PTPN11,GIT1,MAP2K4,CCL5,JAM2,F11R,ATP6V…
Colorectal cancer	MAPK3,SMAD2,FZD5,FZD10,PIK3CG,FZD3,RAC3,PDGFRA,SMAD4,TGFBR2,PIK3CA,FZD1,RALGDS,DVL2,MAPK10,PIK3R1,MET,TGFB2,MAPK8,CASP3,FZD2,MAP2K1,BCL2,AXIN2,APC,RAF1,DCC,FZD7,MLH1,MYC,PIK3CB,PIK3R5,MSH3,SOS2,FZD8,CASP9,BAD,PIK3R2,DVL3,RAC1,MAPK1,CYCS,ACVR1B,GRB2,MSH6,GSK3B,APC2,CTNNB1,APPL1,MAPK9,EGFR,TGFBR1,AKT3,KRAS,PDGFRB,RAC2,PIK3CD,CCND1,AKT1,PIK3CA,LEF1,ACVR1C,TCF7,FZD6,FZD4,AXIN1,TGFB3,MSH2,CYCS,BAX,AKT…
