# Supplementary material for: The use of Multidimensional Data to Identify the Molecular Biomarker for Pancreatic Ductal Adenocarcinoma
Source: Biomed Res Int. 2013 Sep 21;2013:798054. doi: 10.1155/2013/798054 (PMC3793503; doi:10.1155/2013/798054)
Supplement: Supplementary file 2 [file 798054.f2.xls]

## Sheet: Sheet1
Supplementary Table 2.
Survival gene list selected by univariate cox proportionhazards model
Symbol	Accession	Parametric p-value	Hazard Ratio	Name
PER2	NM_022817	3e-07	0.436	Homo sapiens period homolog 2 (Drosophila) (PER2), mRNA [NM_022817]
TPM3	NM_001043351	1.4e-06	2.339	Homo sapiens tropomyosin 3 (TPM3), transcript variant 4, mRNA [NM_001043351]
PRR13	NM_001005354	2.6e-06	3.324	Homo sapiens proline rich 13 (PRR13), transcript variant 3, mRNA [NM_001005354]
PHIP	BC036479	4.3e-06	0.429	Homo sapiens pleckstrin homology domain interacting protein, mRNA (cDNA clone IMAGE:5260603). [BC036479]
FTSJ3	NM_017647	4.9e-06	1.93	Homo sapiens FtsJ homolog 3 (E. coli) (FTSJ3), mRNA [NM_017647]
TYMP	NM_001113756	5.7e-06	2.67	Homo sapiens thymidine phosphorylase (TYMP), transcript variant 3, mRNA [NM_001113756]
PPP2R2D	BU681302	6.4e-06	0.321	UI-CF-EC1-abv-i-20-0-UI.s1 UI-CF-EC1 Homo sapiens cDNA clone UI-CF-EC1-abv-i-20-0-UI 3', mRNA sequence [BU681302]
CNPY3	NM_006586	8.4e-06	2.171	Homo sapiens canopy 3 homolog (zebrafish) (CNPY3), mRNA [NM_006586]
MRPL38	NM_032478	8.5e-06	4.013	Homo sapiens mitochondrial ribosomal protein L38 (MRPL38), nuclear gene encoding mitochondrial protein, mRNA [NM_032478]
C8orf17	AF220264	8.9e-06	0.472	Homo sapiens MOST-1 mRNA, complete cds. [AF220264]
EIF4H	NM_022170	1.26e-05	0.256	Homo sapiens eukaryotic translation initiation factor 4H (EIF4H), transcript variant 1, mRNA [NM_022170]
TLK2	NM_006852	1.63e-05	2.326	Homo sapiens tousled-like kinase 2 (TLK2), transcript variant A, mRNA [NM_006852]
HNRNPC	NM_031314	1.92e-05	4.618	Homo sapiens heterogeneous nuclear ribonucleoprotein C (C1/C2) (HNRNPC), transcript variant 1, mRNA [NM_031314]
KIAA0513	NM_014732	2.01e-05	0.332	Homo sapiens KIAA0513 (KIAA0513), mRNA [NM_014732]
VPS25	NM_032353	2.03e-05	4.942	Homo sapiens vacuolar protein sorting 25 homolog (S. cerevisiae) (VPS25), mRNA [NM_032353]
RCE1	NM_005133	2.35e-05	3.719	Homo sapiens RCE1 homolog, prenyl protein peptidase (S. cerevisiae) (RCE1), transcript variant 1, mRNA [NM_005133]
TNIP1	NM_006058	2.4e-05	1.722	Homo sapiens TNFAIP3 interacting protein 1 (TNIP1), mRNA [NM_006058]
UGCGL1	NM_001025777	2.42e-05	2.343	Homo sapiens UDP-glucose ceramide glucosyltransferase-like 1 (UGCGL1), transcript variant 2, mRNA [NM_001025777]
ALCAM	NM_001627	2.45e-05	2.306	Homo sapiens activated leukocyte cell adhesion molecule (ALCAM), mRNA [NM_001627]
DDX42	NM_007372	2.72e-05	2.184	Homo sapiens DEAD (Asp-Glu-Ala-Asp) box polypeptide 42 (DDX42), transcript variant 1, mRNA [NM_007372]
ACLY	U18197	2.77e-05	3.79	Human ATP:citrate lyase mRNA, complete cds. [U18197]
CSF3R	NM_172313	3.09e-05	3.05	Homo sapiens colony stimulating factor 3 receptor (granulocyte) (CSF3R), transcript variant 4, mRNA [NM_172313]
AMOTL2	NM_016201	3.46e-05	0.552	Homo sapiens angiomotin like 2 (AMOTL2), mRNA [NM_016201]
IL17RD	NM_017563	3.49e-05	0.599	Homo sapiens interleukin 17 receptor D (IL17RD), mRNA [NM_017563]
TTTY6	NR_001527	3.89e-05	4.74	Homo sapiens testis-specific transcript, Y-linked 6 (TTTY6), non-coding RNA [NR_001527]
MFF	NM_020194	4.25e-05	0.415	Homo sapiens mitochondrial fission factor (MFF), nuclear gene encoding mitochondrial protein, mRNA [NM_020194]
CIITA	U18288	4.47e-05	3.863	Human clone CIITA-10 MHC class II transactivator CIITA mRNA, complete cds. [U18288]
RP1-21O18.1	NM_015209	4.54e-05	0.503	Homo sapiens kazrin (KIAA1026), transcript variant A, mRNA [NM_015209]
DCP1A	NM_018403	4.77e-05	0.343	Homo sapiens DCP1 decapping enzyme homolog A (S. cerevisiae) (DCP1A), mRNA [NM_018403]
TBC1D10A	NM_031937	5.23e-05	3.412	Homo sapiens TBC1 domain family, member 10A (TBC1D10A), mRNA [NM_031937]
NUFIP1	NM_012345	5.43e-05	0.327	Homo sapiens nuclear fragile X mental retardation protein interacting protein 1 (NUFIP1), mRNA [NM_012345]
RSL1D1	NM_015659	5.6e-05	0.452	Homo sapiens ribosomal L1 domain containing 1 (RSL1D1), mRNA [NM_015659]
EXOC4	NM_001037126	5.63e-05	2.561	Homo sapiens exocyst complex component 4 (EXOC4), transcript variant 2, mRNA [NM_001037126]
KIAA0562	AB011134	5.7e-05	0.333	Homo sapiens mRNA for KIAA0562 protein, partial cds. [AB011134]
UST	NM_005715	6.04e-05	0.473	Homo sapiens uronyl-2-sulfotransferase (UST), mRNA [NM_005715]
CDADC1	NM_030911	6.41e-05	0.402	Homo sapiens cytidine and dCMP deaminase domain containing 1 (CDADC1), mRNA [NM_030911]
LOC339316	BC043286	6.44e-05	6.553	Homo sapiens cDNA clone IMAGE:5297759. [BC043286]
ZNF385B	NM_152520	6.56e-05	0.591	Homo sapiens zinc finger protein 385B (ZNF385B), transcript variant 1, mRNA [NM_152520]
IL1RAP	NM_002182	6.6e-05	1.537	Homo sapiens interleukin 1 receptor accessory protein (IL1RAP), transcript variant 1, mRNA [NM_002182]
ACOX3	NM_003501	6.7e-05	0.408	Homo sapiens acyl-Coenzyme A oxidase 3, pristanoyl (ACOX3), transcript variant 1, mRNA [NM_003501]
C10orf4	NM_145246	7.09e-05	0.264	Homo sapiens chromosome 10 open reading frame 4 (C10orf4), mRNA [NM_145246]
FAH	NM_000137	7.19e-05	3.542	Homo sapiens fumarylacetoacetate hydrolase (fumarylacetoacetase) (FAH), mRNA [NM_000137]
TMC6	NM_007267	8.19e-05	2.105	Homo sapiens transmembrane channel-like 6 (TMC6), transcript variant 2, mRNA [NM_007267]
TSSK6	NM_032037	8.42e-05	4.232	Homo sapiens testis-specific serine kinase 6 (TSSK6), mRNA [NM_032037]
FYCO1	NM_024513	8.83e-05	0.558	Homo sapiens FYVE and coiled-coil domain containing 1 (FYCO1), mRNA [NM_024513]
ZYG11B	NM_024646	9.36e-05	0.375	Homo sapiens zyg-11 homolog B (C. elegans) (ZYG11B), mRNA [NM_024646]
PCGF5	NM_032373	9.37e-05	0.51	Homo sapiens polycomb group ring finger 5 (PCGF5), mRNA [NM_032373]
PRPF3	NM_004698	9.58e-05	3.199	Homo sapiens PRP3 pre-mRNA processing factor 3 homolog (S. cerevisiae) (PRPF3), mRNA [NM_004698]
PCYT1B	NM_004845	9.8e-05	0.377	Homo sapiens phosphate cytidylyltransferase 1, choline, beta (PCYT1B), mRNA [NM_004845]
CDC2L1	NM_033489	0.0001016	1.769	Homo sapiens cell division cycle 2-like 1 (PITSLRE proteins) (CDC2L1), transcript variant 5, mRNA [NM_033489]
LOC100130173	XM_001719623	0.0001026	3.715	Pecanex-like protein C14orf135 (Hepatitis C virus F protein-binding protein 2)(HCV F protein-binding protein 2) [Source:UniProtKB/Swiss-Prot;Acc:Q63HM2] [ENST00000391611]
ZNF850P	XM_001722534	0.000104	0.549	Homo sapiens mRNA; cDNA DKFZp686J154 (from clone DKFZp686J154). [CR627133]
HIPK1	NM_198268	0.0001134	0.403	Homo sapiens homeodomain interacting protein kinase 1 (HIPK1), transcript variant 1, mRNA [NM_198268]
OS9	NM_001017956	0.0001188	1.669	Homo sapiens amplified in osteosarcoma (OS9), transcript variant 2, mRNA [NM_001017956]
STRADA	NM_153335	0.0001197	3.152	Homo sapiens STE20-related kinase adaptor alpha (STRADA), transcript variant 3, mRNA [NM_153335]
ALDH8A1	NM_022568	0.0001232	3.261	Homo sapiens aldehyde dehydrogenase 8 family, member A1 (ALDH8A1), transcript variant 1, mRNA [NM_022568]
C3orf23	NM_173826	0.0001245	0.479	Homo sapiens chromosome 3 open reading frame 23 (C3orf23), transcript variant 1, mRNA [NM_173826]
PUM2	NM_015317	0.0001332	0.368	Homo sapiens pumilio homolog 2 (Drosophila) (PUM2), mRNA [NM_015317]
LOC100131283	XM_001716948	0.0001437	2.187	PREDICTED: Homo sapiens hypothetical protein LOC100131283 (LOC100131283), mRNA [XM_001718599]
PRCC	NM_005973	0.0001469	2.582	Homo sapiens papillary renal cell carcinoma (translocation-associated) (PRCC), transcript variant 1, mRNA [NM_005973]
SPAG9	NM_001130528	0.0001506	2.6	Homo sapiens sperm associated antigen 9 (SPAG9), transcript variant 1, mRNA [NM_001130528]
BTF3	NM_001037637	0.0001549	0.3	Homo sapiens basic transcription factor 3 (BTF3), transcript variant 1, mRNA [NM_001037637]
NIP30	NM_024946	0.0001566	2.382	Homo sapiens NEFA-interacting nuclear protein NIP30 (NIP30), mRNA [NM_024946]
LOC647195	XR_017691	0.000158	3.233	PREDICTED: Homo sapiens hypothetical LOC647195 (LOC647195), mRNA [XR_019590]
NUDT7	NM_001105663	0.0001586	0.503	Homo sapiens nudix (nucleoside diphosphate linked moiety X)-type motif 7 (NUDT7), transcript variant 1, mRNA [NM_001105663]
ACTR3B	NM_020445	0.0001592	0.339	Homo sapiens ARP3 actin-related protein 3 homolog B (yeast) (ACTR3B), transcript variant 1, mRNA [NM_020445]
CPEB3	NM_014912	0.0001592	0.537	Homo sapiens cytoplasmic polyadenylation element binding protein 3 (CPEB3), mRNA [NM_014912]
RPS11	NM_001015	0.0001642	0.265	Homo sapiens ribosomal protein S11 (RPS11), mRNA [NM_001015]
tcag7.1015	NR_002187	0.0001684	2.979	Homo sapiens hypothetical protein LOC286016 (LOC286016), non-coding RNA [NR_002187]
PMPCB	NM_004279	0.0001709	0.195	Homo sapiens peptidase (mitochondrial processing) beta (PMPCB), nuclear gene encoding mitochondrial protein, mRNA [NM_004279]
DDX60L	NM_001012967	0.0001788	2.449	Homo sapiens DEAD (Asp-Glu-Ala-Asp) box polypeptide 60-like (DDX60L), mRNA [NM_001012967]
UBR7	NM_175748	0.000179	0.387	Homo sapiens ubiquitin protein ligase E3 component n-recognin 7 (putative) (UBR7), transcript variant 2, mRNA [NM_175748]
LOC100130776	CR590071	0.0001821	2.946	full-length cDNA clone CS0DC010YD15 of Neuroblastoma Cot 25-normalized of Homo sapiens (human). [CR590071]
ZBP1	NM_030776	0.0001824	2.311	Homo sapiens Z-DNA binding protein 1 (ZBP1), mRNA [NM_030776]
BTN2A2	NM_181531	0.0001826	1.601	Homo sapiens butyrophilin, subfamily 2, member A2 (BTN2A2), transcript variant 2, mRNA [NM_181531]
UBE2Z	NM_023079	0.0001832	2.273	Homo sapiens ubiquitin-conjugating enzyme E2Z (UBE2Z), mRNA [NM_023079]
GPS1	NM_212492	0.0001856	3.095	Homo sapiens G protein pathway suppressor 1 (GPS1), transcript variant 1, mRNA [NM_212492]
RASSF5	NM_182664	0.0001863	3.024	Homo sapiens Ras association (RalGDS/AF-6) domain family member 5 (RASSF5), transcript variant 2, mRNA [NM_182664]
TRAF3IP1	NM_015650	0.0001913	0.47	Homo sapiens TNF receptor-associated factor 3 interacting protein 1 (TRAF3IP1), transcript variant 1, mRNA [NM_015650]
HNRNPCL1	NM_001013631	0.0001919	2.523	Homo sapiens heterogeneous nuclear ribonucleoprotein C-like 1 (HNRNPCL1), mRNA [NM_001013631]
TPI1	NM_000365	0.0002013	2.483	Homo sapiens triosephosphate isomerase 1 (TPI1), mRNA [NM_000365]
ACOXL	NM_001105516	0.0002202	2.321	Homo sapiens acyl-Coenzyme A oxidase-like (ACOXL), transcript variant 2, mRNA [NM_001105516]
ZNF560	NM_152476	0.0002212	0.628	Homo sapiens zinc finger protein 560 (ZNF560), mRNA [NM_152476]
C8orf66	AL834492	0.0002249	4.082	Homo sapiens mRNA; cDNA DKFZp434O0331 (from clone DKFZp434O0331). [AL834492]
TBC1D22A	NM_014346	0.0002299	2.087	Homo sapiens TBC1 domain family, member 22A (TBC1D22A), mRNA [NM_014346]
TBRG4	AB023165	0.0002328	0.433	Homo sapiens mRNA for KIAA0948 protein, partial cds. [AB023165]
FBXO11	NM_012167	0.0002355	2.053	Homo sapiens F-box protein 11 (FBXO11), transcript variant 3, mRNA [NM_012167]
MGC27345	BC024231	0.0002355	0.417	Homo sapiens hypothetical protein MGC27345, mRNA (cDNA clone MGC:27345 IMAGE:4670552), complete cds. [BC024231]
C19orf22	NM_138774	0.0002359	1.695	Homo sapiens chromosome 19 open reading frame 22 (C19orf22), mRNA [NM_138774]
PMF1	NM_007221	0.000238	3.15	Homo sapiens polyamine-modulated factor 1 (PMF1), mRNA [NM_007221]
TCFL5	BC065520	0.0002392	0.377	Homo sapiens cDNA clone IMAGE:5787400, partial cds. [BC065520]
PBX2	NM_002586	0.0002409	2.791	Homo sapiens pre-B-cell leukemia homeobox 2 (PBX2), mRNA [NM_002586]
PALM2	NM_053016	0.000243	2.302	Homo sapiens paralemmin 2 (PALM2), transcript variant 1, mRNA [NM_053016]
FLJ40473	AK097792	0.0002529	0.476	Homo sapiens cDNA FLJ40473 fis, clone TESTI2042806. [AK097792]
NEK4	NM_003157	0.0002538	0.427	Homo sapiens NIMA (never in mitosis gene a)-related kinase 4 (NEK4), mRNA [NM_003157]
ACADSB	NM_001609	0.000267	0.423	Homo sapiens acyl-Coenzyme A dehydrogenase, short/branched chain (ACADSB), nuclear gene encoding mitochondrial protein, mRNA [NM_001609]
CCT5	NM_012073	0.0002684	0.503	Homo sapiens chaperonin containing TCP1, subunit 5 (epsilon) (CCT5), mRNA [NM_012073]
SP140L	NM_138402	0.0002728	1.491	Homo sapiens SP140 nuclear body protein-like (SP140L), mRNA [NM_138402]
ADAMTS15	NM_139055	0.00028	2.477	Homo sapiens ADAM metallopeptidase with thrombospondin type 1 motif, 15 (ADAMTS15), mRNA [NM_139055]
AMN1	NM_001113402	0.0002824	0.406	Homo sapiens antagonist of mitotic exit network 1 homolog (S. cerevisiae) (AMN1), transcript variant 1, mRNA [NM_001113402]
LOC440337	AK094332	0.0002859	0.479	Homo sapiens cDNA FLJ37013 fis, clone BRACE2010171. [AK094332]
DEFA3	NM_005217	0.0002861	1.274	Homo sapiens defensin, alpha 3, neutrophil-specific (DEFA3), mRNA [NM_005217]
NSF	NM_006178	0.0002883	2.234	Homo sapiens N-ethylmaleimide-sensitive factor (NSF), mRNA [NM_006178]
ERC2	NM_015576	0.0002901	0.531	Homo sapiens ELKS/RAB6-interacting/CAST family member 2 (ERC2), mRNA [NM_015576]
ATMIN	NM_015251	0.0002911	0.453	Homo sapiens ATM interactor (ATMIN), mRNA [NM_015251]
MRPL49	NM_004927	0.0002929	2.081	Homo sapiens mitochondrial ribosomal protein L49 (MRPL49), nuclear gene encoding mitochondrial protein, mRNA [NM_004927]
ZMIZ1	NM_020338	0.0002959	0.424	Homo sapiens zinc finger, MIZ-type containing 1 (ZMIZ1), mRNA [NM_020338]
FAM86C	NM_018172	0.0002967	1.954	Homo sapiens family with sequence similarity 86, member C (FAM86C), transcript variant 1, mRNA [NM_018172]
ZCCHC6	NM_024617	0.0002973	2.081	Homo sapiens zinc finger, CCHC domain containing 6 (ZCCHC6), mRNA [NM_024617]
DIDO1	NM_033081	0.000298	0.4	Homo sapiens death inducer-obliterator 1 (DIDO1), transcript variant 4, mRNA [NM_033081]
CASP10	NM_032974	0.0002992	2.338	Homo sapiens caspase 10, apoptosis-related cysteine peptidase (CASP10), transcript variant B, mRNA [NM_032974]
ARID2	NM_152641	0.0003091	0.434	Homo sapiens AT rich interactive domain 2 (ARID, RFX-like) (ARID2), mRNA [NM_152641]
LOC100129720	CR619772	0.0003108	0.544	full-length cDNA clone CS0DI044YN21 of Placenta Cot 25-normalized of Homo sapiens (human). [CR619772]
C11orf58	NM_001142705	0.0003141	0.411	Homo sapiens chromosome 11 open reading frame 58 (C11orf58), transcript variant 2, mRNA [NM_001142705]
HM13	NM_178580	0.0003211	2.665	Homo sapiens histocompatibility (minor) 13 (HM13), transcript variant 2, mRNA [NM_178580]
ZNF567	NM_152603	0.0003213	0.438	Homo sapiens zinc finger protein 567 (ZNF567), mRNA [NM_152603]
FAM47B	NM_152631	0.0003218	0.567	Homo sapiens family with sequence similarity 47, member B (FAM47B), mRNA [NM_152631]
MAP4K4	NM_145686	0.000322	2.197	Homo sapiens mitogen-activated protein kinase kinase kinase kinase 4 (MAP4K4), transcript variant 2, mRNA [NM_145686]
CCDC62	NM_032573	0.0003227	2.446	Homo sapiens coiled-coil domain containing 62 (CCDC62), transcript variant 1, mRNA [NM_032573]
C3orf39	NM_032806	0.000327	0.466	Homo sapiens chromosome 3 open reading frame 39 (C3orf39), mRNA [NM_032806]
EWSR1	BC000527	0.0003334	2.332	Homo sapiens Ewing sarcoma breakpoint region 1, mRNA (cDNA clone MGC:8607 IMAGE:2961279), complete cds. [BC000527]
PTTG1IP	NM_004339	0.0003474	1.662	Homo sapiens pituitary tumor-transforming 1 interacting protein (PTTG1IP), mRNA [NM_004339]
TOR3A	NM_022371	0.0003482	2.97	Homo sapiens torsin family 3, member A (TOR3A), mRNA [NM_022371]
PIP5K1A	NM_003557	0.0003485	2.755	Homo sapiens phosphatidylinositol-4-phosphate 5-kinase, type I, alpha (PIP5K1A), transcript variant 2, mRNA [NM_003557]
ZNF329	NM_024620	0.0003535	0.427	Homo sapiens zinc finger protein 329 (ZNF329), mRNA [NM_024620]
NOTCH4	NM_004557	0.0003554	2.681	Homo sapiens Notch homolog 4 (Drosophila) (NOTCH4), mRNA [NM_004557]
OPHN1	NM_002547	0.000358	0.427	Homo sapiens oligophrenin 1 (OPHN1), mRNA [NM_002547]
CUL3	NM_003590	0.0003586	0.35	Homo sapiens cullin 3 (CUL3), mRNA [NM_003590]
C12orf59	NM_153022	0.00036	6.676	Homo sapiens chromosome 12 open reading frame 59 (C12orf59), mRNA [NM_153022]
FAM174A	NM_198507	0.0003655	0.609	Homo sapiens family with sequence similarity 174, member A (FAM174A), mRNA [NM_198507]
ZBTB37	NM_032522	0.000379	1.712	Homo sapiens zinc finger and BTB domain containing 37 (ZBTB37), transcript variant 2, mRNA [NM_032522]
ATRNL1	NM_207303	0.0003819	0.51	Homo sapiens attractin-like 1 (ATRNL1), mRNA [NM_207303]
SDCCAG10	NM_005869	0.0003869	0.301	Homo sapiens serologically defined colon cancer antigen 10 (SDCCAG10), mRNA [NM_005869]
N-PAC	NM_032569	0.0003898	2.909	Homo sapiens cytokine-like nuclear factor n-pac (N-PAC), mRNA [NM_032569]
TRIM4	NM_033017	0.000395	0.409	Homo sapiens tripartite motif-containing 4 (TRIM4), transcript variant alpha, mRNA [NM_033017]
DNAJC8	NM_014280	0.0003966	0.299	Homo sapiens DnaJ (Hsp40) homolog, subfamily C, member 8 (DNAJC8), mRNA [NM_014280]
CRYBG3	NM_153605	0.0003968	0.584	Homo sapiens beta-gamma crystallin domain containing 3 (CRYBG3), mRNA [NM_153605]
NUBPL	NM_025152	0.0004064	0.6	Homo sapiens nucleotide binding protein-like (NUBPL), mRNA [NM_025152]
KIAA1967	NM_021174	0.0004087	3.502	Homo sapiens KIAA1967 (KIAA1967), transcript variant 1, mRNA [NM_021174]
ARHGDIA	NM_004309	0.0004126	2.958	Homo sapiens Rho GDP dissociation inhibitor (GDI) alpha (ARHGDIA), mRNA [NM_004309]
KLF17	NM_173484	0.0004156	3.175	Homo sapiens Kruppel-like factor 17 (KLF17), mRNA [NM_173484]
TMEM174	NM_153217	0.0004184	4.524	Homo sapiens transmembrane protein 174 (TMEM174), mRNA [NM_153217]
WBP2	NM_012478	0.0004209	2.378	Homo sapiens WW domain binding protein 2 (WBP2), mRNA [NM_012478]
OR51A7	NM_001004749	0.0004262	3.48	Homo sapiens olfactory receptor, family 51, subfamily A, member 7 (OR51A7), mRNA [NM_001004749]
OSBP	NM_002556	0.0004279	1.474	Homo sapiens oxysterol binding protein (OSBP), mRNA [NM_002556]
RABGEF1	NM_014504	0.0004287	0.359	Homo sapiens RAB guanine nucleotide exchange factor (GEF) 1 (RABGEF1), mRNA [NM_014504]
NDUFA5	NM_005000	0.0004363	0.348	Homo sapiens NADH dehydrogenase (ubiquinone) 1 alpha subcomplex, 5, 13kDa (NDUFA5), nuclear gene encoding mitochondrial protein, mRNA [NM_005000]
KRTAP4-7	BX648343	0.0004407	0.474	Homo sapiens mRNA; cDNA DKFZp686I16170 (from clone DKFZp686I16170). [BX648343]
RP11-309M23.2	XM_001719899	0.0004426	0.344	PREDICTED: Homo sapiens 60S ribosomal protein L14-like (LOC442442), mRNA [XM_001719899]
HDGF	NM_004494	0.0004483	2.181	Homo sapiens hepatoma-derived growth factor (high-mobility group protein 1-like) (HDGF), transcript variant 1, mRNA [NM_004494]
LIMS3	BC094740	0.0004528	1.476	Homo sapiens cDNA clone IMAGE:30531558, containing frame-shift errors. [BC094740]
CRIM1	NM_016441	0.0004548	0.437	Homo sapiens cysteine rich transmembrane BMP regulator 1 (chordin-like) (CRIM1), mRNA [NM_016441]
HCCS	NM_005333	0.0004672	0.435	Homo sapiens holocytochrome c synthase (cytochrome c heme-lyase) (HCCS), mRNA [NM_005333]
CD276	NM_001024736	0.0004673	2.405	Homo sapiens CD276 molecule (CD276), transcript variant 1, mRNA [NM_001024736]
PPP4C	NM_002720	0.0004689	2.571	Homo sapiens protein phosphatase 4 (formerly X), catalytic subunit (PPP4C), mRNA [NM_002720]
CHERP	NM_006387	0.00047	0.372	Homo sapiens calcium homeostasis endoplasmic reticulum protein (CHERP), mRNA [NM_006387]
RPS2	NM_002952	0.0004745	0.316	Homo sapiens ribosomal protein S2 (RPS2), mRNA [NM_002952]
FERMT1	NM_017671	0.0004773	1.709	Homo sapiens fermitin family homolog 1 (Drosophila) (FERMT1), mRNA [NM_017671]
PFKFB3	NM_004566	0.0004779	1.743	Homo sapiens 6-phosphofructo-2-kinase/fructose-2,6-biphosphatase 3 (PFKFB3), mRNA [NM_004566]
NDST1	NM_001543	0.0004782	2.458	Homo sapiens N-deacetylase/N-sulfotransferase (heparan glucosaminyl) 1 (NDST1), mRNA [NM_001543]
MMP14	NM_004995	0.0004786	1.515	Homo sapiens matrix metallopeptidase 14 (membrane-inserted) (MMP14), mRNA [NM_004995]
ZNF776	NM_173632	0.0004897	1.921	Homo sapiens zinc finger protein 776 (ZNF776), mRNA [NM_173632]
C4orf6	NM_005750	0.0004979	1.817	Homo sapiens chromosome 4 open reading frame 6 (C4orf6), mRNA [NM_005750]
PPFIA1	NM_177423	0.0004983	2.303	Homo sapiens protein tyrosine phosphatase, receptor type, f polypeptide (PTPRF), interacting protein (liprin), alpha 1 (PPFIA1), transcript variant 1, mRNA [NM_177423]
PTMAP7	AF170294	0.0005013	1.631	Homo sapiens prothymosin a14 mRNA, complete cds. [AF170294]
PLA2G12A	NM_030821	0.0005019	0.488	Homo sapiens phospholipase A2, group XIIA (PLA2G12A), mRNA [NM_030821]
MIP	NM_012064	0.0005066	3.045	Homo sapiens major intrinsic protein of lens fiber (MIP), mRNA [NM_012064]
AHNAK	NM_001620	0.0005106	0.456	Homo sapiens AHNAK nucleoprotein (AHNAK), transcript variant 1, mRNA [NM_001620]
MOP-1	XR_041844	0.0005204	1.663	Homo sapiens mRNA for MOP-1, complete cds. [AB014771]
OLAH	NM_001039702	0.0005243	0.565	Homo sapiens oleoyl-ACP hydrolase (OLAH), transcript variant 2, mRNA [NM_001039702]
ANKRD26	NM_014915	0.0005343	0.517	Homo sapiens ankyrin repeat domain 26 (ANKRD26), mRNA [NM_014915]
C7orf51	NM_173564	0.0005346	3.908	Homo sapiens chromosome 7 open reading frame 51 (C7orf51), mRNA [NM_173564]
IL10	NM_000572	0.0005356	1.796	Homo sapiens interleukin 10 (IL10), mRNA [NM_000572]
LOC147804	NR_003148	0.000538	2.399	Homo sapiens tropomyosin 3 pseudogene (LOC147804), non-coding RNA [NR_003148]
XPR1	NM_004736	0.0005445	0.515	Homo sapiens xenotropic and polytropic retrovirus receptor (XPR1), transcript variant 1, mRNA [NM_004736]
ASB4	NM_016116	0.0005524	0.643	Homo sapiens ankyrin repeat and SOCS box-containing 4 (ASB4), transcript variant 1, mRNA [NM_016116]
EEF2K	NM_013302	0.0005526	0.31	Homo sapiens eukaryotic elongation factor-2 kinase (EEF2K), mRNA [NM_013302]
SH3KBP1	NM_001024666	0.0005581	1.478	Homo sapiens SH3-domain kinase binding protein 1 (SH3KBP1), transcript variant 2, mRNA [NM_001024666]
ABCF3	NM_018358	0.0005641	3.606	Homo sapiens ATP-binding cassette, sub-family F (GCN20), member 3 (ABCF3), mRNA [NM_018358]
ACOX2	NM_003500	0.0005643	0.6	Homo sapiens acyl-Coenzyme A oxidase 2, branched chain (ACOX2), mRNA [NM_003500]
FZR1	NM_016263	0.0005659	3.324	Homo sapiens fizzy/cell division cycle 20 related 1 (Drosophila) (FZR1), transcript variant 2, mRNA [NM_016263]
ZNF323	NM_030899	0.0005672	0.474	Homo sapiens zinc finger protein 323 (ZNF323), transcript variant 1, mRNA [NM_030899]
ITGB6	NM_000888	0.0005699	1.389	Homo sapiens integrin, beta 6 (ITGB6), mRNA [NM_000888]
CSNK1G2	NM_001319	0.000573	1.876	Homo sapiens casein kinase 1, gamma 2 (CSNK1G2), mRNA [NM_001319]
C9orf139	NM_207511	0.0005731	3.022	Homo sapiens chromosome 9 open reading frame 139 (C9orf139), mRNA [NM_207511]
SLC2A13	NM_052885	0.000584	1.977	Homo sapiens solute carrier family 2 (facilitated glucose transporter), member 13 (SLC2A13), mRNA [NM_052885]
C6orf168	NM_032511	0.0005865	0.531	Homo sapiens chromosome 6 open reading frame 168 (C6orf168), mRNA [NM_032511]
FOXP2	NM_148898	0.0005897	0.312	Homo sapiens forkhead box P2 (FOXP2), transcript variant 2, mRNA [NM_148898]
ZNF529	NM_020951	0.0005919	0.499	Homo sapiens zinc finger protein 529 (ZNF529), mRNA [NM_020951]
TSC1	NM_000368	0.0006057	0.528	Homo sapiens tuberous sclerosis 1 (TSC1), transcript variant 1, mRNA [NM_000368]
CDKN1B	NM_004064	0.0006077	2.419	Homo sapiens cyclin-dependent kinase inhibitor 1B (p27, Kip1) (CDKN1B), mRNA [NM_004064]
SPG20	NM_015087	0.0006109	0.59	Homo sapiens spastic paraplegia 20 (Troyer syndrome) (SPG20), transcript variant 1, mRNA [NM_015087]
NT5E	NM_002526	0.0006212	2.013	Homo sapiens 5'-nucleotidase, ecto (CD73) (NT5E), mRNA [NM_002526]
RPL23	NM_000978	0.000623	0.485	Homo sapiens ribosomal protein L23 (RPL23), mRNA [NM_000978]
C11orf59	NM_017907	0.000627	5.679	Homo sapiens chromosome 11 open reading frame 59 (C11orf59), mRNA [NM_017907]
PLEKHB1	NM_021200	0.000627	3.722	Homo sapiens pleckstrin homology domain containing, family B (evectins) member 1 (PLEKHB1), transcript variant 1, mRNA [NM_021200]
SULT1E1	NM_005420	0.0006284	1.377	Homo sapiens sulfotransferase family 1E, estrogen-preferring, member 1 (SULT1E1), mRNA [NM_005420]
CHD7	AK000368	0.0006354	2.897	Homo sapiens cDNA FLJ20361 fis, clone HEP16789. [AK000368]
LOC647954	XR_038441	0.0006394	1.603	PREDICTED: Homo sapiens misc_RNA (LOC647954), miscRNA [XR_018676]
EPB41L4A	NM_022140	0.0006403	1.493	Homo sapiens erythrocyte membrane protein band 4.1 like 4A (EPB41L4A), mRNA [NM_022140]
RPS25	NM_001028	0.0006446	0.223	Homo sapiens ribosomal protein S25 (RPS25), mRNA [NM_001028]
PBX1	NM_002585	0.0006459	0.611	Homo sapiens pre-B-cell leukemia homeobox 1 (PBX1), mRNA [NM_002585]
DAAM1	NM_014992	0.000648	0.406	Homo sapiens dishevelled associated activator of morphogenesis 1 (DAAM1), mRNA [NM_014992]
DIABLO	NM_019887	0.0006487	4.663	Homo sapiens diablo homolog (Drosophila) (DIABLO), nuclear gene encoding mitochondrial protein, transcript variant 1, mRNA [NM_019887]
ZNRF3	NM_032173	0.0006629	0.391	Homo sapiens zinc and ring finger 3 (ZNRF3), mRNA [NM_032173]
PBRM1	NM_018313	0.0006655	0.457	Homo sapiens polybromo 1 (PBRM1), transcript variant 2, mRNA [NM_018313]
EIF4EBP2	NM_004096	0.0006688	0.348	Homo sapiens eukaryotic translation initiation factor 4E binding protein 2 (EIF4EBP2), mRNA [NM_004096]
RNF213	NM_020914	0.0006709	1.579	Homo sapiens ring finger protein 213 (RNF213), mRNA [NM_020914]
PTPN6	NM_002831	0.0006793	2.247	Homo sapiens protein tyrosine phosphatase, non-receptor type 6 (PTPN6), transcript variant 1, mRNA [NM_002831]
FDPS	NM_002004	0.0006801	2.626	Homo sapiens farnesyl diphosphate synthase (farnesyl pyrophosphate synthetase, dimethylallyltranstransferase, geranyltranstransferase) (FDPS), transcript variant 1, mRNA [NM_002004]
LOC643201	BC034407	0.0006845	0.544	Homo sapiens cDNA clone IMAGE:5171181. [BC034407]
SLC4A1	NM_000342	0.000687	3.257	Homo sapiens solute carrier family 4, anion exchanger, member 1 (erythrocyte membrane protein band 3, Diego blood group) (SLC4A1), mRNA [NM_000342]
ATP6V0D1	NM_004691	0.0006886	2.881	Homo sapiens ATPase, H+ transporting, lysosomal 38kDa, V0 subunit d1 (ATP6V0D1), mRNA [NM_004691]
NRP1	NM_003873	0.0006895	1.513	Homo sapiens neuropilin 1 (NRP1), transcript variant 1, mRNA [NM_003873]
KCTD15	NM_024076	0.0006934	0.546	Homo sapiens potassium channel tetramerisation domain containing 15 (KCTD15), transcript variant 1, mRNA [NM_024076]
VPS39	NM_015289	0.0006976	2.399	Homo sapiens vacuolar protein sorting 39 homolog (S. cerevisiae) (VPS39), mRNA [NM_015289]
CSAD	NM_015989	0.0006984	1.857	Homo sapiens cysteine sulfinic acid decarboxylase (CSAD), mRNA [NM_015989]
ACN9	NM_020186	0.0007002	0.443	Homo sapiens ACN9 homolog (S. cerevisiae) (ACN9), mRNA [NM_020186]
HMGN1	NM_004965	0.0007116	1.856	Homo sapiens high-mobility group nucleosome binding domain 1 (HMGN1), mRNA [NM_004965]
YWHAE	NM_006761	0.0007157	2.016	Homo sapiens tyrosine 3-monooxygenase/tryptophan 5-monooxygenase activation protein, epsilon polypeptide (YWHAE), transcript variant 1, mRNA [NM_006761]
SLC25A39	NM_016016	0.0007172	2.225	Homo sapiens solute carrier family 25, member 39 (SLC25A39), transcript variant 2, mRNA [NM_016016]
SUSD4	NM_001037175	0.0007201	1.852	Homo sapiens sushi domain containing 4 (SUSD4), transcript variant 2, mRNA [NM_001037175]
TCF25	NM_014972	0.0007214	1.612	Homo sapiens transcription factor 25 (basic helix-loop-helix) (TCF25), mRNA [NM_014972]
NAALAD2	NM_005467	0.0007296	0.494	Homo sapiens N-acetylated alpha-linked acidic dipeptidase 2 (NAALAD2), mRNA [NM_005467]
GLYATL2	NM_145016	0.0007467	0.385	Homo sapiens glycine-N-acyltransferase-like 2 (GLYATL2), mRNA [NM_145016]
RP3-402G11.5	NM_031454	0.0007486	2.027	Homo sapiens selenoprotein O (SELO), mRNA [NM_031454]
NAT12	NM_001011713	0.0007507	0.426	Homo sapiens N-acetyltransferase 12 (GCN5-related, putative) (NAT12), mRNA [NM_001011713]
ZNF326	NM_182976	0.000754	0.387	Homo sapiens zinc finger protein 326 (ZNF326), transcript variant 1, mRNA [NM_182976]
JMJD2A	NM_014663	0.0007549	1.803	Homo sapiens jumonji domain containing 2A (JMJD2A), mRNA [NM_014663]
RANBP3L	NM_145000	0.0007565	0.333	Homo sapiens RAN binding protein 3-like (RANBP3L), mRNA [NM_145000]
CPSF6	NM_007007	0.0007605	0.497	Homo sapiens cleavage and polyadenylation specific factor 6, 68kDa (CPSF6), mRNA [NM_007007]
C18orf33	AK096231	0.0007652	1.59	Homo sapiens cDNA FLJ38912 fis, clone NT2NE2007425. [AK096231]
TSPYL1	AK096882	0.0007672	0.457	Homo sapiens cDNA FLJ39563 fis, clone SKMUS2001164. [AK096882]
NCRNA00081	NR_024140	0.0007854	0.319	Homo sapiens non-protein coding RNA 81 (NCRNA00081), non-coding RNA [NR_024140]
TRMT2B	NM_024917	0.0007913	3.186	Homo sapiens TRM2 tRNA methyltransferase 2 homolog B (S. cerevisiae) (TRMT2B), mRNA [NM_024917]
LOC729806	XR_037682	0.000792	1.614	PREDICTED: Homo sapiens misc_RNA (LOC729806), miscRNA [XR_037682]
CADPS2	NM_017954	0.0008031	0.436	Homo sapiens Ca++-dependent secretion activator 2 (CADPS2), transcript variant 1, mRNA [NM_017954]
C1orf100	NM_001012970	0.0008049	5.378	Homo sapiens chromosome 1 open reading frame 100 (C1orf100), mRNA [NM_001012970]
CCND1	NM_053056	0.0008059	1.686	Homo sapiens cyclin D1 (CCND1), mRNA [NM_053056]
LOC100128116	XR_038299	0.0008101	1.603	PREDICTED: Homo sapiens misc_RNA (LOC100128116), miscRNA [XR_038299]
ASB5	NM_080874	0.0008159	0.412	Homo sapiens ankyrin repeat and SOCS box-containing 5 (ASB5), mRNA [NM_080874]
GBP3	NM_018284	0.0008167	1.525	Homo sapiens guanylate binding protein 3 (GBP3), mRNA [NM_018284]
DUOXA1	AK056896	0.0008331	1.433	Homo sapiens cDNA FLJ32334 fis, clone PROST2005426. [AK056896]
PARP14	NM_017554	0.000834	1.549	Homo sapiens poly (ADP-ribose) polymerase family, member 14 (PARP14), mRNA [NM_017554]
DENND1B	NM_144977	0.0008394	2.605	Homo sapiens DENN/MADD domain containing 1B (DENND1B), transcript variant 2, mRNA [NM_144977]
ALG9	NM_001077691	0.000848	0.408	Homo sapiens asparagine-linked glycosylation 9, alpha-1,2-mannosyltransferase homolog (S. cerevisiae) (ALG9), transcript variant 3, mRNA [NM_001077691]
PRPF38B	NM_018061	0.0008658	0.36	Homo sapiens PRP38 pre-mRNA processing factor 38 (yeast) domain containing B (PRPF38B), mRNA [NM_018061]
ADCY9	NM_001116	0.0008697	0.608	Homo sapiens adenylate cyclase 9 (ADCY9), mRNA [NM_001116]
OAS3	NM_006187	0.0008716	1.809	Homo sapiens 2'-5'-oligoadenylate synthetase 3, 100kDa (OAS3), mRNA [NM_006187]
PLCL1	NM_006226	0.0008743	0.453	Homo sapiens phospholipase C-like 1 (PLCL1), transcript variant 2, mRNA [NM_006226]
C15orf33	NM_152647	0.0008781	0.26	Homo sapiens chromosome 15 open reading frame 33 (C15orf33), mRNA [NM_152647]
BCL6B	NM_181844	0.000882	3.215	Homo sapiens B-cell CLL/lymphoma 6, member B (zinc finger protein) (BCL6B), mRNA [NM_181844]
RUSC1	NM_014328	0.0008845	3.256	Homo sapiens RUN and SH3 domain containing 1 (RUSC1), transcript variant 4, mRNA [NM_014328]
MUM1	NM_032853	0.0008866	2.947	Homo sapiens melanoma associated antigen (mutated) 1 (MUM1), transcript variant 1, mRNA [NM_032853]
CIAPIN1P	XR_015247	0.0008909	3.296	PREDICTED: Homo sapiens misc_RNA (LOC728599), miscRNA [XR_015541]
NPFFR2	NM_053036	0.0008915	0.428	Homo sapiens neuropeptide FF receptor 2 (NPFFR2), transcript variant 2, mRNA [NM_053036]
LOC100132086	XR_037769	0.0008991	0.49	PREDICTED: Homo sapiens misc_RNA (LOC100132086), miscRNA [XR_037769]
ARFIP2	NM_012402	0.0009007	2.707	Homo sapiens ADP-ribosylation factor interacting protein 2 (ARFIP2), mRNA [NM_012402]
MARK4	AK074578	0.0009098	0.46	Homo sapiens cDNA FLJ90097 fis, clone HEMBA1005929, weakly similar to H.sapiens mRNA for serine/threonine protein kinase EMK. [AK074578]
CEP152	NM_014985	0.0009126	2.015	Homo sapiens centrosomal protein 152kDa (CEP152), mRNA [NM_014985]
DNAJC24	NM_181706	0.0009126	0.454	Homo sapiens DnaJ (Hsp40) homolog, subfamily C, member 24 (DNAJC24), mRNA [NM_181706]
ARL6IP5	NM_006407	0.0009171	0.537	Homo sapiens ADP-ribosylation-like factor 6 interacting protein 5 (ARL6IP5), mRNA [NM_006407]
BRD2	NM_005104	0.0009204	1.814	Homo sapiens bromodomain containing 2 (BRD2), transcript variant 1, mRNA [NM_005104]
C20orf72	NM_052865	0.0009314	2.262	Homo sapiens chromosome 20 open reading frame 72 (C20orf72), mRNA [NM_052865]
MLLT4	NM_005936	0.0009454	1.848	Homo sapiens myeloid/lymphoid or mixed-lineage leukemia (trithorax homolog, Drosophila); translocated to, 4 (MLLT4), transcript variant 3, mRNA [NM_005936]
DET1	NM_017996	0.0009487	0.519	Homo sapiens de-etiolated homolog 1 (Arabidopsis) (DET1), mRNA [NM_017996]
POLR1E	AK225050	0.0009691	0.42	Homo sapiens mRNA for RNA polymerase I associated factor 53 variant, clone: adSE00728. [AK225050]
EPC2	NM_015630	0.0009807	0.473	Homo sapiens enhancer of polycomb homolog 2 (Drosophila) (EPC2), mRNA [NM_015630]
GOLGA3	NM_005895	0.0009825	1.437	Homo sapiens golgi autoantigen, golgin subfamily a, 3 (GOLGA3), mRNA [NM_005895]
ZNF295	NM_020727	0.0009842	0.522	Homo sapiens zinc finger protein 295 (ZNF295), transcript variant 2, mRNA [NM_020727]
CCDC44	NM_016360	0.000989	3.764	Homo sapiens coiled-coil domain containing 44 (CCDC44), mRNA [NM_016360]
POLK	NM_016218	0.0009934	0.534	Homo sapiens polymerase (DNA directed) kappa (POLK), mRNA [NM_016218]
SPACA5	NM_205856	0.0009946	0.337	Homo sapiens sperm acrosome associated 5 (SPACA5), mRNA [NM_205856]
