# Supplementary material for: The use of Multidimensional Data to Identify the Molecular Biomarker for Pancreatic Ductal Adenocarcinoma
Source: Biomed Res Int. 2013 Sep 21;2013:798054. doi: 10.1155/2013/798054 (PMC3793503; doi:10.1155/2013/798054)
Supplement: Supplementary file 3 [file 798054.f3.xls]

## Sheet: Sheet1
Supplementary Table 3.
Enrichment Analysis of survival gene with TF regulation, miRNA target and KEGG pathway
TranscriptionFactor GeneSets	Number of total genes	FDR
TP53	890	0.0141
CEBPA	19	0.0187
STAT6	49	0.0194
PGR	61	0.0225
E2F1	816	0.0329
NFKB2	45	0.0387
HOXB4	13	0.0395
RARB	215	0.0421
E2F4	558	0.0424
GLI2	18	0.0447
STAT4	28	0.0469
NFIC	321	0.0487
MicroRNA GeneSets
hsa-miR-543	551	0.0001
hsa-miR-576	577	0.0004
hsa-miR-32	97	0.0008
hsa-miR-545	185	0.0021
hsa-miR-608	540	0.0072
hsa-miR-658	476	0.0164
hsa-miR-198	512	0.0192
hsa-miR-627	493	0.0197
hsa-miR-652	441	0.023
hsa-miR-616	172	0.0337
hsa-miR-526b	84	0.0412
Kegg Pathway
Glycolysis / Gluconeogenesis	123	0.0001
Circadian rhythm	37	0.0001
Phosphatidylinositol signaling system	158	0.0001
Hedgehog signaling pathway	98	0.0007
Insulin signaling pathway	337	0.0007
Tight junction	318	0.0047
Huntington	121	0.0073
mTOR signaling pathway	162	0.0163
Amyotrophic lateral sclerosis (ALS)	75	0.0213
Alzheimer	116	0.0231
VEGF signaling pathway	264	0.0274
GnRH signaling pathway	308	0.0308
Gap junction	248	0.0356
Colorectal cancer	398	0.0374
Fructose and mannose metabolism	81	0.0385
